# Supplementary material for: Targeted DNA Methylation Screen in the Mouse Mammary Genome Reveals a Parity-Induced Hypermethylation of Igf1r That Persists Long after Parturition
Source: Oxford University Press journal article supplement (doi:10.1158/1940-6207.capr-15-0178), 2015-08-19
Supplement: 19406207capr150178-sup-148893_1_supp_3063685_nrn0cq.xlsx [file 19406207capr150178-sup-148893_1_supp_3063685_nrn0cq.xlsx]

## Sheet: Hyper.MetaAnalysis
	Chromosome	Start	End	stat	p.value	FDR	Weight.1	weight.2	effect.size.1	effect.size.2	p.value.1	p.value.2	Trimmed.mean.difference.1	Trimmed.mean.difference.2	Gene.annotate	Promoter.indicator	CpG.indicator	dist.to.feature	feature.name	feature.strand	prom	exon	intron	CpGi	shores	mean.coverage.by.gene.early	No.CpG.window
chr1.40001881.40002000	chr1	40001881	40002000	1e-20	1e-20	3.86111e-20	1	1	11.7663	15.9142	0.000215686	1.24259e-07	14.3327	14.7577	Map4k4	FALSE	FALSE	44125	NM_001252202	+	0	0	1	0	0	52.5	3
chr1.63493201.63493320	chr1	63493201	63493320	1e-20	1e-20	3.86111e-20	1	1	16.5999	15.2715	3.41545e-06	1.36353e-05	16.9193	11.2585	Adam23	TRUE	FALSE	725	NM_001177600	+	1	0	1	0	1	26.3333	1
chr1.63493321.63493440	chr1	63493321	63493440	1e-20	1e-20	3.86111e-20	1	1	13.8949	22.0931	0.000637584	1.48054e-07	11.4287	13.0937	Adam23	TRUE	FALSE	845	NM_001177600	+	1	0	1	0	1	26.5	1
chr1.92963401.92963520	chr1	92963401	92963520	2.26728e-08	4.53455e-08	1.57102e-07	1	1	16.579	12.7776	5.33697e-06	7.39167e-05	18.7359	15.3709	Lrrfip1	FALSE	FALSE	13382	NM_001111311	+	0	0	1	0	0	40.6667	1
chr1.95111161.95111280	chr1	95111161	95111280	2.26728e-08	4.53455e-08	1.57102e-07	1	1	10.0853	19.4211	0.00259184	1.54653e-07	10.0753	22.6035	E030010N08Rik	FALSE	FALSE	-21194	NM_172463	+	0	0	0	0	0	47.1667	1
chr1.134271121.134271240	chr1	134271121	134271240	1e-20	1e-20	3.86111e-20	1	1	27.3934	21.6038	2.42488e-10	6.47781e-08	16.0534	15.0277	Tmcc2	FALSE	FALSE	16619	NM_178874	-	0	0	1	0	0	19.5	1
chr1.136188841.136188960	chr1	136188841	136188960	1e-20	1e-20	3.86111e-20	1	1	25.9401	24.2827	4.17403e-08	3.99067e-08	23.7789	27.101	Myog	FALSE	FALSE	2262	NM_031189	+	0	1	0	0	0	14.1667	1
chr1.138524041.138524160	chr1	138524041	138524160	2.30582e-05	5.73847e-05	0.000135003	1	1	11.3514	10.2995	0.000780742	0.00191711	10.091	12.7488	Zfp281	FALSE	FALSE	2565	NM_001160251	+	0	1	0	0	0	53.6667	1
chr1.155588161.155588280	chr1	155588161	155588280	1.85917e-05	4.65925e-05	0.000111254	1	1	17.7559	10.4072	5.85855e-05	0.0203608	19.0077	11.4395	Rgs16	TRUE	FALSE	680	NM_011267	+	1	0	1	0	0	27.8333	2
chr1.164502121.164502240	chr1	164502121	164502240	1e-20	1e-20	3.86111e-20	1	1	35.0693	22.4161	3.33067e-16	9.5618e-07	24.4472	24.0898	Vamp4	FALSE	FALSE	1164	NM_016796	+	0	0	1	0	1	18.1667	2
chr1.177577321.177577440	chr1	177577321	177577440	3.17419e-07	7.48201e-07	2.35967e-06	1	1	16.4237	10.3623	4.74747e-06	0.00186918	12.8804	13.3185	Kmo	FALSE	FALSE	14999	NM_133809	+	0	1	1	0	0	29.6667	1
chr1.177811801.177811920	chr1	177811801	177811920	2.26728e-08	4.53455e-08	1.57102e-07	1	1	11.0731	11.8392	1.19402e-05	5.75753e-05	10.4149	12.5546	Exo1	TRUE	FALSE	894	NM_012012	+	1	0	1	0	1	65.5	1
chr1.184391281.184391400	chr1	184391281	184391400	1e-20	1e-20	3.86111e-20	1	1	15.0751	34.9198	0.00104971	2.9976e-15	14.6497	37.8998	Trp53bp2	FALSE	FALSE	51985	NM_173378	+	0	0	1	0	0	21.6667	1
chr1.188961241.188961360	chr1	188961241	188961360	2.26728e-08	4.53455e-08	1.57102e-07	1	1	15.6278	14.5963	1.36271e-05	9.44512e-06	12.8848	17.1182	Spata17	FALSE	FALSE	12226	NR_040554	+	0	0	1	0	0	49	2
chr10.8481121.8481240	chr10	8481121	8481240	4.62524e-06	1.14724e-05	3.0024e-05	1	1	18.525	11.7113	0.000201489	0.00126675	26.4534	10.5883	Sash1	FALSE	FALSE	124629	NM_175155	-	0	0	1	0	0	22.6667	2
chr10.10168681.10168800	chr10	10168681	10168800	3.67525e-05	9.11218e-05	0.000207787	1	1	10.6794	10.0176	0.000989057	0.00251486	10.8242	15.9641	9130014G24Rik	FALSE	FALSE	23313	NM_001127353	-	0	0	1	0	0	53.8333	2
chr10.26500801.26500920	chr10	26500801	26500920	2.77968e-05	6.90612e-05	0.00016041	1	1	14.4487	17.7791	0.00543277	0.00033607	15.8866	17.0406	Arhgap18	FALSE	FALSE	8485	NM_176837	+	0	0	1	0	0	17	1
chr10.59040721.59040840	chr10	59040721	59040840	1e-20	1e-20	3.86111e-20	1	1	14.4096	19.1082	3.6109e-06	1.26543e-12	16.7499	16.9153	Ccdc109a	FALSE	FALSE	38601	NM_001033259	-	0	0	1	0	0	15	1
chr10.69249601.69249720	chr10	69249601	69249720	9.29583e-07	2.28995e-06	6.7284e-06	1	1	11.8901	14.2482	0.00034223	7.68612e-05	13.3834	22.8576	Ank3	FALSE	FALSE	-138560	NM_170687	+	0	0	1	0	0	46.8333	2
chr10.70688881.70689000	chr10	70688881	70689000	1e-20	1e-20	3.86111e-20	1	1	18.1227	11.07	7.4724e-10	0.000239654	20.9158	12.8444	Tfam	FALSE	FALSE	11793	NM_009360	-	0	1	0	0	0	37.5	1
chr10.77388841.77388960	chr10	77388841	77388960	1.81382e-06	4.44386e-06	1.23932e-05	1	1	13.6603	13.5621	0.000227874	0.00037258	11.5209	11.7925	Trpm2	FALSE	FALSE	-23561	NM_145152	-	0	0	1	0	0	17.3333	2
chr10.77874601.77874720	chr10	77874601	77874720	2.43052e-05	6.07176e-05	0.0001424	1	1	16.0868	13.9152	0.000238964	0.00661515	18.5695	19.4292	Rrp1	FALSE	FALSE	1069	NM_010925	-	0	0	1	0	1	27	1
chr10.83834761.83834880	chr10	83834761	83834880	4.0811e-07	9.97601e-07	3.08811e-06	1	1	10.4265	14.026	0.000440034	2.94221e-05	13.3546	14.4145	Nuak1	FALSE	FALSE	68337	NM_001004363	-	0	1	0	0	0	61.1667	3
chr10.115516081.115516200	chr10	115516081	115516200	1.83649e-06	4.51188e-06	1.25677e-05	1	1	11.7258	15.9332	0.00173383	4.98314e-05	12.449	15.9401	Ptprr	FALSE	FALSE	34774	NM_001161855	-	0	0	1	0	0	41.8333	1
chr10.119452201.119452320	chr10	119452201	119452320	2.26728e-08	4.53455e-08	1.57102e-07	1	1	19.3901	13.3702	2.32867e-07	0.00130278	16.2714	11.3006	Grip1	FALSE	FALSE	97702	NM_080446	-	0	0	1	0	0	36.1667	1
chr10.127166401.127166520	chr10	127166401	127166520	8.04203e-05	0.000197276	0.000424795	1	1	10.7946	21.4274	0.0440334	0.000136355	12.7594	17.4019	Tac2	FALSE	FALSE	3955	NM_009312	+	0	0	1	0	0	16	2
chr11.4118761.4118880	chr11	4118761	4118880	1e-20	1e-20	3.86111e-20	1	1	18.4468	18.1186	2.02282e-07	3.95412e-08	17.686	16.9847	Gatsl3	TRUE	FALSE	509	NM_028022	+	1	0	1	0	1	13.5	3
chr11.5891401.5891520	chr11	5891401	5891520	2.85677e-05	7.10111e-05	0.00016465	1	1	10.6581	14.8497	0.00189573	0.000989948	10.2272	25.2655	Camk2b	FALSE	FALSE	35642	NM_019661	+	0	0	1	0	0	41.6667	1
chr11.49619521.49619640	chr11	49619521	49619640	1.58709e-07	3.85437e-07	1.2553e-06	1	1	13.2499	15.7437	0.000337938	1.1019e-05	11.177	15.3857	Gfpt2	FALSE	FALSE	11866	NM_013529	+	0	0	1	0	0	39.6667	2
chr11.51634321.51634440	chr11	51634321	51634440	2.92479e-06	7.3233e-06	1.97832e-05	1	1	10.6878	19.3179	0.0092354	1.58686e-05	12.8119	18.8252	Phf15	FALSE	FALSE	36544	NM_199299	-	0	0	1	0	0	25.5	1
chr11.53687401.53687520	chr11	53687401	53687520	3.17419e-07	7.48201e-07	2.35967e-06	1	1	11.9331	12.9222	7.47116e-05	0.00010495	11.9825	10.2221	Slc22a5	FALSE	FALSE	-14644	NR_033332	-	0	0	1	0	0	65.3333	1
chr11.68849761.68849880	chr11	68849761	68849880	2.26728e-08	4.53455e-08	1.57102e-07	1	1	14.767	17.0289	0.000215216	6.94803e-06	10.4313	14.3249	1500010J02Rik	FALSE	FALSE	-9265	NM_011496	+	0	1	0	0	0	23.6667	1
chr11.69869521.69869640	chr11	69869521	69869640	1e-20	1e-20	3.86111e-20	1	1	12.5269	15.7686	5.10032e-05	6.43338e-07	18.0796	21.975	Asgr1	FALSE	FALSE	1652	NM_009714	+	0	1	1	0	0	12.6667	3
chr11.70685521.70685640	chr11	70685521	70685640	1e-20	1e-20	3.86111e-20	1	1	10.5872	29.2101	0.00987494	2.22045e-16	10.7092	30.7476	c("Rabep1", "LOC100503922")	FALSE	FALSE	27258	NM_019400	+	0	0	1	0	0	31	1
chr11.72740041.72740160	chr11	72740041	72740160	3.02455e-05	7.51148e-05	0.000173558	1	1	11.4845	12.4786	0.00412313	0.000479477	14.5526	13.6434	Zzef1	FALSE	FALSE	-34511	NM_016745	+	0	1	0	0	0	12.3333	2
chr11.74888161.74888280	chr11	74888161	74888280	1e-20	1e-20	3.86111e-20	1	1	15.4823	14.0662	9.88286e-06	4.92606e-06	10.6111	11.6444	Smg6	FALSE	FALSE	-8669	NR_030454	-	0	0	1	0	0	36.1667	1
chr11.78114601.78114720	chr11	78114601	78114720	7.61805e-06	1.93172e-05	4.89026e-05	1	1	10.4805	15.7147	0.00380648	0.000122485	10.8779	20.1288	Gm3948	TRUE	FALSE	-373	NM_017407	+	1	0	0	0	1	34.6667	1
chr11.78281521.78281640	chr11	78281521	78281640	0.000347324	0.000832838	0.00160862	1	1	11.322	14.1844	0.0136745	0.0022356	14.4699	20.9851	Slc46a1	FALSE	FALSE	2320	NM_026740	+	0	0	1	0	1	25.8333	1
chr11.80415361.80415480	chr11	80415361	80415480	2.26728e-08	4.53455e-08	1.57102e-07	1	1	17.9558	10.8454	7.97148e-08	0.0016479	16.4149	10.8781	Myo1d	FALSE	FALSE	124815	NM_009871	+	0	0	1	0	0	46.1667	2
chr11.83231041.83231160	chr11	83231041	83231160	2.26728e-08	4.53455e-08	1.57102e-07	1	1	19.115	17.1235	1.68222e-05	5.78829e-05	17.9026	15.1666	Rasl10b	FALSE	FALSE	7469	NM_001013386	+	0	0	1	0	1	6.5	1
chr11.85528321.85528440	chr11	85528321	85528440	2.26728e-08	4.53455e-08	1.57102e-07	1	1	16.5905	14.9313	3.28031e-06	4.31597e-05	11.5947	11.4029	Bcas3	FALSE	FALSE	4807	NR_045875	-	0	0	1	0	0	40	2
chr11.87952921.87953040	chr11	87952921	87953040	1.68232e-05	4.20126e-05	0.000101043	1	1	11.1661	15.0046	0.00303275	0.000355534	21.3745	13.0939	Cuedc1	FALSE	FALSE	-30027	NM_001172099	+	0	0	1	0	0	37.6667	2
chr11.88922401.88922520	chr11	88922401	88922520	4.30782e-06	1.06789e-05	2.8068e-05	1	1	10.4902	15.6316	0.01236	1.92709e-05	10.9296	14.9845	A930013B10Rik	TRUE	FALSE	-340	NM_019505	-	1	0	0	0	1	16.6667	2
chr11.94226881.94227000	chr11	94226881	94227000	2.494e-07	6.34837e-07	2.01792e-06	1	1	24.194	13.7182	1.11713e-06	0.00571946	14.716	11.11	Abcc3	FALSE	FALSE	27291	NM_029600	-	0	0	1	0	0	16.1667	1
chr11.101324641.101324760	chr11	101324641	101324760	6.16699e-06	1.55535e-05	3.99478e-05	1	1	21.7309	11.1514	1.90124e-05	0.0192667	20.3342	13.9298	c("LOC100502949", "Vat1")	FALSE	FALSE	2754	NM_012037	-	0	0	1	0	0	17.5	1
chr11.104120041.104120160	chr11	104120041	104120160	6.80183e-07	1.67778e-06	5.03138e-06	1	1	11.9336	22.8204	0.0107642	1.89627e-06	16.2638	23.7128	Mapt	FALSE	FALSE	27293	NM_001038609	+	0	0	1	0	0	30.3333	2
chr11.107844121.107844240	chr11	107844121	107844240	1e-20	1e-20	3.86111e-20	1	1	15.5122	25.535	2.05022e-06	5.85088e-14	11.3936	24.1365	Prkca	FALSE	FALSE	-67753	NM_001199301	-	0	0	1	0	0	49.6667	2
chr11.109581361.109581480	chr11	109581361	109581480	1e-20	1e-20	3.86111e-20	1	1	11.5595	11.0696	1.28887e-05	3.07553e-06	11.2951	11.0294	Fam20a	FALSE	FALSE	2091	NM_153782	-	0	0	1	0	1	77.1667	1
chr11.116049241.116049360	chr11	116049241	116049360	5.66819e-07	1.40571e-06	4.26184e-06	1	1	14.504	17.5921	0.000619473	2.69417e-05	10.451	11.6843	Acox1	FALSE	FALSE	-10809	NM_027107	+	0	0	1	0	0	25.5	3
chr11.120811561.120811680	chr11	120811561	120811680	1e-20	1e-20	3.86111e-20	1	1	18.2612	26.475	4.98181e-06	4.41985e-08	20.2605	21.405	Slc16a3	FALSE	FALSE	1182	NM_001038653	+	0	0	1	0	1	38.8333	1
chr12.3852841.3852960	chr12	3852841	3852960	2.08589e-06	5.16939e-06	1.4256e-05	1	1	14.204	16.3489	0.000436361	0.00023588	10.7714	12.0815	Dnmt3a	FALSE	FALSE	9285	NR_045884	-	0	0	1	0	0	35.1667	2
chr12.55299121.55299240	chr12	55299121	55299240	1e-20	1e-20	3.86111e-20	1	1	20.4347	17.0286	1.05575e-09	7.60146e-08	23.3301	17.3794	Egln3	FALSE	FALSE	5622	NM_028133	-	0	0	1	0	0	47.1667	2
chr12.81359521.81359640	chr12	81359521	81359640	4.56856e-05	0.00011282	0.000253287	1	1	11.7991	12.4183	0.00263213	0.00120402	17.2251	12.0996	Actn1	FALSE	FALSE	1719	NM_134156	-	0	0	1	0	1	20.6667	1
chr12.82300441.82300560	chr12	82300441	82300560	1e-20	1e-20	3.86111e-20	1	1	16.4239	16.625	3.57276e-09	8.33528e-06	10.2396	14.5221	Slc8a3	FALSE	FALSE	33305	NR_037227	+	0	1	0	0	0	68.3333	5
chr12.109782361.109782480	chr12	109782361	109782480	2.26728e-08	4.53455e-08	1.57102e-07	1	1	14.6477	15.5612	5.31642e-05	6.33741e-06	16.3968	14.5677	LOC100504467	FALSE	FALSE	-10450	NM_007965	+	0	0	1	0	0	28	1
chr12.111931561.111931680	chr12	111931561	111931680	5.84957e-06	1.47373e-05	3.79684e-05	1	1	13.2242	16.1907	0.000564866	0.000613277	11.7077	13.9481	Hsp90aa1	FALSE	FALSE	2926	NM_010480	-	0	1	0	0	0	33.1667	1
chr12.112777561.112777680	chr12	112777561	112777680	1e-20	1e-20	3.86111e-20	1	1	24.9352	18.8362	6.49203e-10	6.6044e-06	25.3752	16.8733	Eif5	TRUE	TRUE	1251	NM_178041	+	0	1	1	0	1	33	1
chr12.119231761.119231880	chr12	119231761	119231880	2.26728e-08	4.53455e-08	1.57102e-07	1	1	11.6696	20.3526	0.000858015	1.69e-06	15.5932	22.9786	Dnahc11	FALSE	FALSE	149429	NM_146040	+	0	0	1	0	0	30.6667	1
chr13.24852721.24852840	chr13	24852721	24852840	1e-20	1e-20	3.86111e-20	1	1	16.2019	18.4248	1.43071e-05	4.3849e-08	19.359	21.0344	Gmnn	TRUE	FALSE	967	NM_020567	-	1	0	1	0	1	25.1667	3
chr13.25361281.25361400	chr13	25361281	25361400	1e-20	1e-20	3.86111e-20	1	1	15.588	14.4524	3.58963e-07	4.47173e-07	11.4364	12.4908	Nrsn1	TRUE	FALSE	466	NM_009513	-	1	0	1	0	0	48	2
chr13.67830601.67830720	chr13	67830601	67830720	2.26728e-08	4.53455e-08	1.57102e-07	1	1	18.446	10.0296	1.13525e-07	0.00753364	12.5175	12.0888	4930441O14Rik	TRUE	FALSE	404	NR_027969	+	1	1	1	0	0	19.1667	1
chr13.89680321.89680440	chr13	89680321	89680440	1e-20	1e-20	3.86111e-20	1	1	14.3341	12.7715	1.39072e-06	4.82923e-06	17.3875	11.5208	Hapln1	TRUE	FALSE	82	NM_013500	+	1	1	0	0	0	56.8333	5
chr13.91241881.91242000	chr13	91241881	91242000	3.68886e-05	9.14392e-05	0.000208444	1	1	11.6881	13.9711	0.00657437	0.000380612	10.8781	13.891	Atg10	FALSE	FALSE	121593	NM_025770	-	0	0	1	0	0	33.3333	1
chr13.94913401.94913520	chr13	94913401	94913520	1e-20	1e-20	3.86111e-20	1	1	10.5951	24.521	0.00100601	2.77556e-14	11.1932	32.6598	Lhfpl2	FALSE	FALSE	85652	NM_172589	+	0	0	1	0	0	26.3333	5
chr13.95986321.95986440	chr13	95986321	95986440	1e-20	1e-20	3.86111e-20	1	1	10.9827	18.0127	0.00103776	8.18085e-08	12.469	18.737	Pde8b	FALSE	FALSE	6566	NM_001170669	-	0	0	1	0	0	48.6667	3
chr13.96404401.96404520	chr13	96404401	96404520	1.08829e-06	2.69806e-06	7.81476e-06	1	1	17.0854	14.3808	0.000175602	0.000192096	21.8012	18.166	Iqgap2	FALSE	FALSE	-16014	NM_010169	-	0	0	1	0	0	11.1667	1
chr13.98975041.98975160	chr13	98975041	98975160	1e-20	1e-20	3.86111e-20	1	1	12.3331	14.5559	9.4769e-05	4.49271e-07	16.7496	16.2617	Rgnef	TRUE	FALSE	961	NM_012026	-	1	0	1	0	1	63.3333	3
chr13.105612001.105612120	chr13	105612001	105612120	9.0691e-08	2.494e-07	8.31884e-07	1	1	15.325	18.4319	0.00102862	3.23236e-06	10.0638	20.5166	Sfrs12ip1	FALSE	FALSE	4684	NM_026075	+	0	0	1	0	0	22.5	1
chr13.110442001.110442120	chr13	110442001	110442120	1e-20	1e-20	3.86111e-20	1	1	12.7219	19.7038	1.91934e-08	1.11022e-16	10.4935	21.4489	Pde4d	FALSE	FALSE	-251897	NR_035442	+	0	0	1	0	0	108.833	3
chr13.110613721.110613840	chr13	110613721	110613840	4.81569e-05	0.000118851	0.0002657	1	1	15.5914	10.5516	0.000332985	0.0102361	14.5036	15.1186	Pde4d	FALSE	FALSE	-80177	NR_035442	+	0	0	1	0	0	9.16667	1
chr13.113320681.113320800	chr13	113320681	113320800	1e-20	1e-20	3.86111e-20	1	1	19.2029	20.577	3.37011e-05	3.21893e-06	22.225	19.1107	Il31ra	FALSE	FALSE	50071	NM_139299	-	0	0	1	0	0	23	1
chr14.26553961.26554080	chr14	26553961	26554080	2.26728e-08	4.53455e-08	1.57102e-07	1	1	19.2308	17.1639	5.15511e-06	0.000159404	10.6524	15.3305	Zcchc24	FALSE	FALSE	-33194	NR_028021	-	0	0	1	0	0	19.8333	1
chr14.33475561.33475680	chr14	33475561	33475680	1e-20	1e-20	3.86111e-20	1	1	17.2512	11.4606	2.86561e-09	0.0025449	10.2422	14.3411	LOC100504518	FALSE	FALSE	22779	NM_001195097	-	0	1	0	0	0	55	2
chr14.34737361.34737480	chr14	34737361	34737480	1e-20	1e-20	3.86111e-20	1	1	12.1019	16.8415	2.46325e-06	3.00093e-13	10.1156	16.1179	Gdf10	TRUE	TRUE	590	NM_145741	+	1	1	1	0	1	22.8333	6
chr14.35204641.35204760	chr14	35204641	35204760	3.17419e-07	7.48201e-07	2.35967e-06	1	1	13.2297	12.1029	7.29462e-06	0.00109861	10.1032	14.5105	Mmrn2	FALSE	FALSE	15953	NM_153127	+	0	0	1	0	0	49.8333	2
chr14.55690681.55690800	chr14	55690681	55690800	4.67059e-06	1.15404e-05	3.01964e-05	1	1	12.7181	15.5221	0.00014445	0.00177648	12.3009	22.1945	Zfhx2	TRUE	TRUE	-1128	NR_004444	+	0	1	1	0	0	34.3333	4
chr14.67636801.67636920	chr14	67636801	67636920	0.000434002	0.00103608	0.0019675	1	1	13.3835	13.1765	0.0095752	0.00405666	19.1039	17.6452	Ppp2r2a	FALSE	FALSE	-9088	NM_009761	-	0	0	1	0	0	22.3333	1
chr14.70866361.70866480	chr14	70866361	70866480	6.12164e-07	1.4964e-06	4.51492e-06	1	1	10.3704	20.9591	0.0143592	1.2918e-06	10.9456	20.3642	Phyhip	FALSE	FALSE	9039	NM_145981	+	0	0	1	0	0	23.8333	2
chr14.71026441.71026560	chr14	71026441	71026560	2.494e-07	6.34837e-07	2.01792e-06	1	1	12.7359	14.5965	0.000122696	5.10884e-05	11.3231	18.2678	Epb4.9	TRUE	FALSE	313	NM_001252663	-	1	1	1	0	0	55.8333	1
chr14.104093521.104093640	chr14	104093521	104093640	1e-20	1e-20	3.86111e-20	1	1	20.3393	14.6992	3.36455e-07	3.35755e-05	17.6432	14.2999	Slain1	FALSE	FALSE	5010	NR_045148	-	0	1	1	0	0	31.6667	1
chr14.120705721.120705840	chr14	120705721	120705840	2.26728e-08	4.53455e-08	1.57102e-07	1	1	12.4935	19.3405	0.00728105	1.50584e-07	13.6184	16.8115	Mbnl2	TRUE	FALSE	30832	NM_207515	+	0	0	1	0	0	15.5	4
chr14.122670601.122670720	chr14	122670601	122670720	1e-20	1e-20	3.86111e-20	1	1	13.2698	31.9135	0.00019299	2.66454e-15	13.9372	33.1225	Clybl	FALSE	FALSE	-37742	NR_015532	-	0	0	1	0	0	44.8333	2
chr15.32944321.32944440	chr15	32944321	32944440	1e-20	1e-20	3.86111e-20	1	1	15.5223	10.7962	1.88352e-08	0.000102695	15.0197	10.1159	Sdc2	FALSE	FALSE	-68444	NM_176073	+	0	0	1	0	0	73.5	1
chr15.34371961.34372080	chr15	34371961	34372080	2.08589e-06	5.16939e-06	1.4256e-05	1	1	15.1685	13.2153	0.000443115	0.000231415	13.4256	13.8254	Rpl30	TRUE	FALSE	901	NM_009083	-	1	0	1	0	1	22	3
chr15.66993121.66993240	chr15	66993121	66993240	8.16219e-07	1.97253e-06	5.8608e-06	1	1	20.776	19.2051	0.000167756	0.000135203	15.0928	19.8986	St3gal1	FALSE	FALSE	15205	NM_009177	-	0	0	1	0	0	14	1
chr15.79945561.79945680	chr15	79945561	79945680	2.45319e-05	6.11711e-05	0.000143376	1	1	12.2727	12.7314	0.00266745	0.000599485	13.0984	14.0037	Syngr1	FALSE	FALSE	-17904	NM_025609	+	0	0	1	0	0	32.5	1
chr15.89366041.89366160	chr15	89366041	89366160	4.53455e-07	1.08829e-06	3.36106e-06	1	1	11.9688	22.3405	0.0150232	8.76442e-07	11.5369	23.5384	Shank3	FALSE	FALSE	-32597	NM_001205049	+	0	0	1	0	0	22.6667	1
chr15.93352321.93352440	chr15	93352321	93352440	1e-20	1e-20	3.86111e-20	1	1	21.0382	20.6324	2.35056e-07	3.47574e-06	10.0526	17.6007	Prickle1	FALSE	FALSE	73883	NM_001033217	-	0	0	1	0	0	27.6667	3
chr15.99894481.99894600	chr15	99894481	99894600	2.26728e-08	4.53455e-08	1.57102e-07	1	1	19.0346	16.2527	1.58861e-06	0.000103759	12.3631	17.8779	Dip2b	FALSE	FALSE	25388	NM_001159361	+	0	0	1	0	0	30.3333	1
chr16.6455881.6456000	chr16	6455881	6456000	3.21953e-06	8.0715e-06	2.16637e-05	1	1	19.5737	15.8657	0.000176372	0.000930892	13.7859	12.0153	A2bp1	FALSE	FALSE	480203	NR_045799	+	0	0	1	0	0	11.3333	1
chr16.13313521.13313640	chr16	13313521	13313640	1e-20	1e-20	3.86111e-20	1	1	31.2711	20.5627	4.35612e-10	2.48733e-05	29.7685	19.8808	Mkl2	FALSE	FALSE	-44874	NM_153588	+	0	0	1	0	0	20.8333	1
chr16.18875281.18875400	chr16	18875281	18875400	8.61565e-07	2.08589e-06	6.17036e-06	1	1	25.7133	11.1215	7.24383e-07	0.032483	12.2351	20.9969	Mrpl40	FALSE	FALSE	1331	NM_010922	-	0	0	1	0	1	21.8333	1
chr16.24853441.24853560	chr16	24853441	24853560	2.26728e-08	4.53455e-08	1.57102e-07	1	1	12.613	19.8802	0.00458135	4.87382e-07	13.8622	14.4678	Lpp	FALSE	FALSE	131502	NM_001145954	+	0	0	1	0	0	24.5	1
chr16.28928161.28928280	chr16	28928161	28928280	8.54083e-05	0.000209519	0.000449177	1	1	10.2766	11.4553	0.0022287	0.00287732	13.445	10.6265	1600021P15Rik	FALSE	FALSE	1505	NM_177718	-	0	0	1	0	1	25.6667	1
chr16.33594241.33594360	chr16	33594241	33594360	7.86745e-06	1.9884e-05	5.0242e-05	1	1	12.1644	15.4152	0.00481577	0.000100481	16.1861	16.1908	Slc12a8	FALSE	FALSE	75562	NM_001083902	+	0	0	1	0	0	18.1667	1
chr16.35023921.35024040	chr16	35023921	35024040	0.000439534	0.00104882	0.00199006	1	1	11.1284	14.1811	0.0331818	0.00118593	22.1779	18.114	Ptplb	FALSE	FALSE	1416	NM_023587	+	0	0	1	0	1	19.8333	1
chr16.36068521.36068640	chr16	36068521	36068640	5.87224e-06	1.47826e-05	3.80581e-05	1	1	11.7497	18.6754	0.00618429	5.63019e-05	19.5892	15.4379	Fam162a	FALSE	FALSE	2962	NM_027342	-	0	0	1	0	0	34.1667	2
chr16.85021441.85021560	chr16	85021441	85021560	1e-20	1e-20	3.86111e-20	1	1	15.8788	18.8206	2.69854e-06	5.19372e-06	12.8424	11.636	App	FALSE	FALSE	48987	NR_045889	+	0	0	1	0	0	42	1
chr16.87712561.87712680	chr16	87712561	87712680	1e-20	1e-20	3.86111e-20	1	1	10.0443	12.463	1.44142e-07	4.28098e-05	17.2883	12.0734	Bach1	FALSE	FALSE	13364	NM_007520	+	0	0	1	0	0	60.8333	2
chr16.91917721.91917840	chr16	91917721	91917840	7.16232e-05	0.000175805	0.000381805	1	1	12.4682	15.1464	0.00957729	0.000549932	18.5328	16.8954	Itsn1	FALSE	FALSE	14036	NM_138597	-	0	1	0	0	0	14.1667	3
chr16.92694361.92694480	chr16	92694361	92694480	9.0691e-08	2.494e-07	8.31884e-07	1	1	11.758	12.6561	6.54725e-05	4.88641e-05	10.944	13.7894	Runx1	FALSE	FALSE	3094	NM_009821	-	0	0	1	0	1	57.1667	2
chr16.93975481.93975600	chr16	93975481	93975600	1e-20	1e-20	3.86111e-20	1	1	17.7191	23.6236	3.00223e-10	6.11733e-14	13.7256	29.8382	Cldn14	FALSE	TRUE	33483	NM_019500	-	0	0	1	0	0	69.5	4
chr16.94836721.94836840	chr16	94836721	94836840	1e-20	1e-20	3.86111e-20	1	1	30.8051	21.1048	1.86107e-08	0.000425128	22.2085	18.2953	Dyrk1a	FALSE	FALSE	44209	NM_001113389	+	0	0	1	0	0	15.3333	2
chr17.11722441.11722560	chr17	11722441	11722560	1.08829e-06	2.69806e-06	7.81476e-06	1	1	17.8001	13.7349	3.82104e-05	0.000995106	17.2639	12.7824	Park2	FALSE	FALSE	353496	NR_045808	-	0	0	1	0	0	27.5	1
chr17.12187321.12187440	chr17	12187321	12187440	1.21526e-05	3.05175e-05	7.48864e-05	1	1	14.485	17.789	0.0023533	0.000332284	10.564	16.7469	Park2	FALSE	FALSE	-111267	NR_045808	-	0	0	1	0	0	26.3333	1
chr17.15633841.15633960	chr17	15633841	15633960	2.26728e-08	4.53455e-08	1.57102e-07	1	1	17.5708	12.4475	3.05649e-06	0.000249234	12.1091	11.0239	Psmb1	FALSE	FALSE	1281	NM_011185	-	0	0	1	0	1	19.3333	1
chr17.24491521.24491640	chr17	24491521	24491640	2.26728e-08	4.53455e-08	1.57102e-07	1	1	12.7362	14.6922	7.86346e-05	1.39057e-05	12.6119	14.8702	Abca3	FALSE	FALSE	2532	NM_001039581	+	0	0	1	0	1	55.8333	2
chr17.24639361.24639480	chr17	24639361	24639480	4.0811e-07	9.97601e-07	3.08811e-06	1	1	14.0945	20.1739	0.000150521	8.17613e-05	12.1474	18.5362	Caskin1	FALSE	FALSE	13635	NM_027937	+	0	1	1	0	0	24.1667	3
chr17.27820561.27820680	chr17	27820561	27820680	9.74928e-07	2.38064e-06	6.9698e-06	1	1	11.2376	13.3209	0.000426588	6.85904e-05	12.3538	15.5729	Pacsin1	FALSE	FALSE	-1519	NM_178365	+	0	0	1	0	1	44.1667	1
chr17.27836521.27836640	chr17	27836521	27836640	0.000901151	0.00212231	0.00380716	1	1	15.0965	11.5337	0.00307031	0.028472	13.5768	12.8617	Pacsin1	FALSE	FALSE	14324	NM_178365	+	0	0	1	0	0	19.8333	2
chr17.29339761.29339880	chr17	29339761	29339880	2.26728e-08	4.53455e-08	1.57102e-07	1	1	16.6512	16.646	6.84712e-06	8.80049e-05	19.2825	19.1486	Cpne5	FALSE	FALSE	34856	NM_153166	-	0	0	1	0	0	30.5	3
chr17.31396921.31397040	chr17	31396921	31397040	0.000486285	0.00115871	0.00218151	1	1	14.8148	11.2263	0.00216697	0.0203242	18.6834	12.4694	Rsph1	FALSE	FALSE	17262	NM_025290	-	0	0	1	0	0	24.8333	2
chr17.80859721.80859840	chr17	80859721	80859840	1e-20	1e-20	3.86111e-20	1	1	10.2715	16.379	1.84853e-07	1.11022e-16	13.7496	14.3582	Sos1	FALSE	FALSE	19954	NM_009231	-	0	0	1	0	0	121.833	3
chr17.85842481.85842600	chr17	85842481	85842600	0.000397227	0.000949966	0.00181618	1	1	11.365	14.6262	0.0148637	0.00237964	11.1629	10.6903	1700106N22Rik	FALSE	FALSE	175137	NR_038085	-	0	0	1	0	0	23.6667	1
chr17.86407681.86407800	chr17	86407681	86407800	1.26061e-05	3.17645e-05	7.77439e-05	1	1	11.7302	11.1516	0.000629966	0.00129337	13.4003	11.8694	Srbd1	FALSE	FALSE	136716	NM_030133	-	0	0	1	0	0	47.3333	3
chr17.87765841.87765960	chr17	87765841	87765960	1e-20	1e-20	3.86111e-20	1	1	18.6056	12.2636	2.35691e-07	0.000145916	16.4943	14.1965	Ttc7	FALSE	FALSE	61122	NM_029298	-	0	0	1	0	0	27	1
chr18.6773401.6773520	chr18	6773401	6773520	6.80183e-08	1.81382e-07	6.11509e-07	1	1	11.9116	21.4845	0.00429239	6.19054e-07	14.2503	10.4191	Rab18	FALSE	FALSE	8200	NM_181070	+	0	0	1	0	0	27.1667	1
chr18.12903961.12904080	chr18	12903961	12904080	2.26728e-08	4.53455e-08	1.57102e-07	1	1	13.7764	13.8731	6.00074e-06	3.22917e-05	14.0879	20.1095	Cabyr	FALSE	FALSE	4099	NM_001042418	+	0	0	1	0	0	40.8333	1
chr18.33993241.33993360	chr18	33993241	33993360	2.26728e-08	4.53455e-08	1.57102e-07	1	1	18.638	18.053	2.20483e-05	0.000101053	15.8419	24.5697	Epb4.1l4a	TRUE	FALSE	38697	NR_038151	+	0	0	1	0	0	30.5	1
chr18.37984441.37984560	chr18	37984441	37984560	1.07469e-05	2.69352e-05	6.65826e-05	1	1	11.7863	10.357	0.00134288	0.000514834	14.357	10.7245	c("Pcdhga1", "Pcdhga2", "Pcdhga3", "Pcdhgb1", "Pcdhga4", "Pcdhgb2", "Pcdhga5", "Pcdhga6", "Pcdhga7", "Pcdhgb4", "Pcdhga8", "Pcdhgb5", "Pcdhga9", "Pcdhgb6", "Pcdhga10", "Pcdhgb7", "Pcdhga11", "Pcdhgb8", "Pcdhga12", "Pcdhgc3", "Pcdhgc4", "Pcdhgc5")	TRUE	FALSE	5243	NM_033583	+	0	0	1	0	0	14.5	2
chr18.38762041.38762160	chr18	38762041	38762160	6.80183e-08	1.81382e-07	6.11509e-07	1	1	15.4406	13.7317	7.49207e-05	3.67222e-05	11.3346	13.2384	9630014M24Rik	FALSE	FALSE	-1120	NM_011898	-	0	0	0	0	1	14.6667	3
chr18.61335001.61335120	chr18	61335001	61335120	3.85437e-07	9.52256e-07	2.9576e-06	1	1	19.2431	13.2238	5.08515e-06	0.00227207	16.5723	11.374	Hmgxb3	FALSE	FALSE	1584	NM_178277	-	0	0	1	0	1	25.3333	1
chr18.66670081.66670200	chr18	66670081	66670200	2.26728e-08	4.53455e-08	1.57102e-07	1	1	14.2857	12.1502	5.08365e-05	3.81792e-05	12.6008	13.9726	LOC100503565	FALSE	TRUE	6251	NR_040528	+	0	1	0	0	0	10.8333	4
chr18.68221801.68221920	chr18	68221801	68221920	4.55722e-05	0.000112548	0.000252743	1	1	13.3076	11.231	0.000477073	0.00661743	13.2194	10.075	D18Ertd653e	FALSE	FALSE	128892	NM_172631	+	0	0	1	0	0	44.3333	2
chr18.70215121.70215240	chr18	70215121	70215240	2.26728e-08	4.53455e-08	1.57102e-07	1	1	14.2226	14.3917	4.4644e-05	4.50682e-05	12.8788	10.5225	Rab27b	FALSE	FALSE	-2099	NM_030554	-	0	0	1	0	0	44.6667	1
chr18.74091721.74091840	chr18	74091721	74091840	2.26728e-08	4.53455e-08	1.57102e-07	1	1	20.6304	18.912	5.93822e-06	0.000253826	18.7122	28.8098	Mapk4	FALSE	FALSE	72682	NM_027741	+	0	0	1	0	0	27.8333	1
chr18.84259801.84259920	chr18	84259801	84259920	0.000644246	0.00152721	0.00281333	1	1	13.2104	11.3288	0.00636051	0.00945674	17.3885	12.2251	Zadh2	FALSE	FALSE	2253	NM_146090	+	0	0	1	0	1	25	1
chr19.4711201.4711320	chr19	4711201	4711320	1.47373e-06	3.55962e-06	1.00708e-05	1	1	12.2219	14.9512	0.00119619	5.35499e-05	11.2137	18.5392	c("LOC100502815", "Spnb3")	TRUE	FALSE	0	NM_021287	+	1	1	0	0	1	32.1667	1
chr19.6058681.6058800	chr19	6058681	6058800	1e-20	1e-20	3.86111e-20	1	1	31.9878	16.3275	1.2623e-09	0.000220365	24.4032	15.2768	Fau	TRUE	FALSE	716	NM_001190436	+	1	0	1	0	1	11.5	2
chr19.11382841.11382960	chr19	11382841	11382960	1.83649e-06	4.51188e-06	1.25677e-05	1	1	14.803	10.6688	2.48875e-05	0.00344298	11.0996	12.1395	Ms4a14	FALSE	FALSE	-24539	NM_183190	-	0	0	0	0	0	42.5	1
chr19.12041521.12041640	chr19	12041521	12041640	2.26728e-08	4.53455e-08	1.57102e-07	1	1	13.9182	10.1244	3.11731e-07	0.000882388	13.6748	10.8448	Osbp	FALSE	FALSE	1189	NM_001033174	+	0	0	1	0	1	75.1667	1
chr19.23651401.23651520	chr19	23651401	23651520	1e-20	1e-20	3.86111e-20	1	1	14	14.868	1.5921e-05	4.54786e-06	11.432	13.1288	1700028P14Rik	FALSE	FALSE	75783	NM_026188	-	0	0	1	0	0	46.8333	1
chr19.30023401.30023520	chr19	30023401	30023520	5.62284e-06	1.42158e-05	3.67318e-05	1	1	12.8477	10.0453	0.000107618	0.003062	14.9394	11.5276	Il33	FALSE	FALSE	3123	NM_001164724	+	0	0	1	0	0	17.5	1
chr19.36131161.36131280	chr19	36131161	36131280	1e-20	1e-20	3.86111e-20	1	1	12.3957	11.1039	2.38101e-07	1.11392e-07	12.1545	12.0031	Htr7	TRUE	TRUE	571	NM_008315	-	1	1	1	1	0	30.6667	9
chr19.36704161.36704280	chr19	36704161	36704280	2.26728e-08	4.53455e-08	1.57102e-07	1	1	10.4762	14.0357	7.8724e-05	6.58623e-06	11.724	12.736	1500017E21Rik	FALSE	FALSE	59690	NR_033510	-	0	0	1	0	0	81.1667	1
chr19.41816401.41816520	chr19	41816401	41816520	2.26728e-08	4.53455e-08	1.57102e-07	1	1	17.901	14.0433	3.09704e-06	0.000247726	12.7783	14.4028	Slit1	FALSE	FALSE	1827	NM_015748	-	0	0	1	0	1	34.5	2
chr19.46443961.46444080	chr19	46443961	46444080	1e-20	1e-20	3.86111e-20	1	1	11.0327	13.7176	1.35569e-05	4.81837e-14	11.3348	13.0162	Tmem180	FALSE	FALSE	12593	NM_029186	+	0	0	1	0	0	33.3333	2
chr19.53182081.53182200	chr19	53182081	53182200	1e-20	1e-20	3.86111e-20	1	1	20.2051	25.7984	2.58787e-09	4.77396e-15	16.6191	25.7807	Gm9618	FALSE	FALSE	31341	NR_045320	+	0	0	0	0	0	43.5	2
chr19.53825761.53825880	chr19	53825761	53825880	1e-20	1e-20	3.86111e-20	1	1	14.6778	28.0558	0.000667659	4.86508e-08	16.0718	29.8708	Rbm20	FALSE	FALSE	73967	NM_001170847	+	0	0	1	0	0	28.8333	2
chr19.56369401.56369520	chr19	56369401	56369520	7.13512e-05	0.000175147	0.000380521	1	1	11.4908	10.62	0.00453749	0.00115412	19.5749	10.5505	Habp2	FALSE	FALSE	6975	NM_146101	+	0	0	1	0	0	14.5	3
chr19.58470721.58470840	chr19	58470721	58470840	1e-20	1e-20	3.86111e-20	1	1	19.2507	20.8949	7.04108e-08	8.32665e-08	20.9441	23.4593	Gfra1	FALSE	FALSE	58117	NM_010279	-	0	0	1	0	0	38.3333	3
chr2.4182001.4182120	chr2	4182001	4182120	1e-20	1e-20	3.86111e-20	1	1	13.7646	36.5771	0.00330534	1.11022e-16	12.1175	34.1954	Frmd4a	FALSE	FALSE	108094	NM_172475	+	0	0	1	0	0	22.1667	1
chr2.6468241.6468360	chr2	6468241	6468360	1e-20	1e-20	3.86111e-20	1	1	21.4049	17.7877	5.53571e-10	1.92604e-06	18.2912	20.8407	Cugbp2	FALSE	FALSE	194461	NM_181399	+	0	1	1	0	0	46	3
chr2.28890001.28890120	chr2	28890001	28890120	0.000282661	0.000680319	0.00133446	1	1	11.3432	14.212	0.0151673	0.00160768	11.0541	13.0189	1700101E01Rik	FALSE	FALSE	20467	NM_001166705	-	0	0	1	0	0	25.6667	3
chr2.44890441.44890560	chr2	44890441	44890560	1e-20	1e-20	3.86111e-20	1	1	11.4342	13.8319	3.71859e-05	3.3721e-07	10.2747	13.7056	Zeb2	FALSE	FALSE	-11745	NR_039591	-	0	0	1	0	0	60.6667	1
chr2.50993401.50993520	chr2	50993401	50993520	3.01548e-06	7.52735e-06	2.02896e-05	1	1	10.685	15.7745	0.00674821	2.2276e-05	18.323	18.7123	Rnd3	FALSE	FALSE	11112	NM_028810	-	0	0	1	0	0	29.1667	1
chr2.58845121.58845240	chr2	58845121	58845240	1e-20	1e-20	3.86111e-20	1	1	22.397	18.1082	1.83449e-07	7.00164e-06	22.6801	17.6347	Ccdc148	FALSE	FALSE	153445	NM_001001178	-	0	0	1	0	0	27.8333	1
chr2.103139521.103139640	chr2	103139521	103139640	9.0691e-07	2.19926e-06	6.47452e-06	1	1	17.4797	15.1672	0.000215925	0.000116734	16.2734	10.0369	Ehf	FALSE	FALSE	3714	NM_007914	-	0	0	1	0	0	26.1667	2
chr2.110503801.110503920	chr2	110503801	110503920	2.71166e-05	6.73608e-05	0.00015679	1	1	10.471	16.0577	0.0263227	6.76361e-05	13.1562	10.9977	Ano3	FALSE	FALSE	-57845	NM_172979	+	0	0	1	0	0	25.5	2
chr2.126301801.126301920	chr2	126301801	126301920	3.42359e-05	8.50002e-05	0.000194823	1	1	10.6237	11.0782	0.000756344	0.00302812	10.5929	13.3139	Atp8b4	FALSE	FALSE	15370	NM_001080944	-	0	0	1	0	0	60.5	2
chr2.130086961.130087080	chr2	130086961	130087080	0.00178931	0.00414982	0.00704112	1	1	11.3902	13.983	0.017036	0.0109926	14.6944	16.8945	Tmc2	FALSE	FALSE	-13068	NM_024193	+	0	1	1	0	0	22	1
chr2.151910041.151910160	chr2	151910041	151910160	1.63697e-05	4.08563e-05	9.84232e-05	1	1	11.0754	12.3849	0.00108114	0.000978571	11.194	10.6508	Scrt2	FALSE	FALSE	2778	NM_001160410	+	0	0	1	0	1	41.8333	2
chr2.152993641.152993760	chr2	152993641	152993760	2.9928e-06	7.52735e-06	2.02896e-05	1	1	16.3393	14.2365	0.000540652	0.000276675	11.5662	10.9047	Tm9sf4	FALSE	FALSE	6606	NM_133847	+	0	0	1	0	0	8.66667	1
chr2.154285441.154285560	chr2	154285441	154285560	1e-20	1e-20	3.86111e-20	1	1	16.1697	18.056	5.73602e-05	4.00565e-08	11.38	18.993	Cbfa2t2	FALSE	FALSE	23223	NM_172860	+	0	0	1	0	0	18	1
chr2.155755201.155755320	chr2	155755201	155755320	2.26728e-07	5.89492e-07	1.90246e-06	1	1	12.6819	15.1664	0.000606777	8.63269e-06	12.8265	16.1554	Uqcc	TRUE	FALSE	727	NM_018888	-	1	0	1	0	1	19.3333	2
chr2.157251241.157251360	chr2	157251241	157251360	1e-20	1e-20	3.86111e-20	1	1	28.399	25.6132	3.98486e-08	4.67489e-08	31.8965	21.8239	Src	FALSE	FALSE	1214	NM_001025395	+	0	0	1	0	1	18.1667	2
chr2.157387441.157387560	chr2	157387441	157387560	1e-20	1e-20	3.86111e-20	1	1	18.9082	26.101	0.000123686	2.78352e-07	17.1482	34.6284	c("Blcap", "Nnat")	FALSE	TRUE	1597	NM_010923	+	0	1	1	0	1	18.8333	5
chr2.163127281.163127400	chr2	163127281	163127400	1e-20	1e-20	3.86111e-20	1	1	13.2433	16.6665	3.56855e-06	7.55046e-07	15.3142	16.4341	Tox2	FALSE	FALSE	76093	NM_001098799	+	0	0	1	0	0	62.6667	1
chr2.164426041.164426160	chr2	164426041	164426160	7.93546e-06	2.01334e-05	5.08175e-05	1	1	11.9512	17.2266	0.0115397	4.24526e-05	13.3442	17.0256	Wfdc8	FALSE	FALSE	-6971	NM_029325	-	0	0	1	0	0	19	1
chr2.166273801.166273920	chr2	166273801	166273920	1e-20	1e-20	3.86111e-20	1	1	17.6488	20.2539	2.32049e-08	2.17604e-14	13.1402	23.1579	5031425F14Rik	TRUE	FALSE	852	NR_015558	+	1	1	0	0	0	32.3333	3
chr2.166771081.166771200	chr2	166771081	166771200	0.000115472	0.000281233	0.000590099	1	1	15.8039	11.8466	0.00105842	0.0084898	14.5034	10.1606	Cse1l	FALSE	FALSE	39487	NM_023565	+	0	0	1	0	0	15.6667	1
chr2.166954081.166954200	chr2	166954081	166954200	6.67713e-05	0.000164015	0.000358094	1	1	10.7846	10.6609	0.00138754	0.00349046	10.5674	13.9843	Kcnb1	FALSE	FALSE	60119	NM_008420	-	0	0	1	0	0	45.1667	1
chr2.168527881.168528000	chr2	168527881	168528000	1e-20	1e-20	3.86111e-20	1	1	13.1494	24.1067	9.05446e-06	4.55191e-15	17.1186	24.8856	Atp9a	FALSE	TRUE	39301	NM_015731	-	0	0	1	0	0	63.1667	4
chr2.179403601.179403720	chr2	179403601	179403720	1e-20	1e-20	3.86111e-20	1	1	15.6532	27.0864	2.73077e-06	3.33067e-15	10.4208	29.9706	Cdh4	FALSE	TRUE	226420	NM_009867	+	0	0	1	0	0	48.8333	5
chr3.9599761.9599880	chr3	9599761	9599880	2.13124e-06	5.30542e-06	1.46093e-05	1	1	11.894	14.2748	0.00079444	0.000132414	11.1111	16.1026	Zfp704	FALSE	FALSE	10206	NM_133218	-	0	0	1	0	0	43.6667	2
chr3.27881161.27881280	chr3	27881161	27881280	2.90891e-05	7.21674e-05	0.00016716	1	1	12.4714	15.5876	0.00567208	0.000335602	14.4554	17.3584	Pld1	FALSE	FALSE	-1813	NM_008875	+	0	0	1	0	0	22.3333	2
chr3.30253081.30253200	chr3	30253081	30253200	2.26728e-08	4.53455e-08	1.57102e-07	1	1	17.6756	10.8185	2.66791e-07	0.000808369	12.4503	13.836	Mecom	FALSE	FALSE	155210	NM_021442	-	0	0	1	0	0	25	2
chr3.51289801.51289920	chr3	51289801	51289920	3.85437e-07	9.52256e-07	2.9576e-06	1	1	16.7797	11.8388	7.35407e-06	0.00159476	13.574	10.6266	Rab33b	FALSE	FALSE	1915	NM_016858	+	0	0	1	0	1	31.3333	1
chr3.78890281.78890400	chr3	78890281	78890400	1e-20	1e-20	3.86111e-20	1	1	21.978	13.9586	5.07426e-08	0.000499527	22.2708	14.6654	Rapgef2	FALSE	FALSE	59398	NM_001099624	-	0	0	1	0	0	33.1667	1
chr3.79088521.79088640	chr3	79088521	79088640	1e-20	1e-20	3.86111e-20	1	1	15.6767	18.6965	1.20518e-06	1.10761e-07	15.8616	16.7177	LOC100504025	FALSE	FALSE	-60658	NM_001142953	+	0	0	0	0	1	49.5	1
chr3.79341601.79341720	chr3	79341601	79341720	1.65511e-06	4.05842e-06	1.13809e-05	1	1	13.7433	15.1816	0.000734368	0.00010158	14.1536	19.5413	Fnip2	FALSE	FALSE	29882	NM_001162999	-	0	0	1	0	0	39	2
chr3.86636881.86637000	chr3	86636881	86637000	1.58709e-07	3.85437e-07	1.2553e-06	1	1	18.2363	16.7055	4.37253e-05	9.63388e-05	19.3509	16.421	Dclk2	FALSE	TRUE	87807	NM_027539	-	0	0	1	0	0	27.5	3
chr3.108117121.108117240	chr3	108117121	108117240	1e-20	1e-20	3.86111e-20	1	1	12.9123	16.071	1.63786e-05	3.78201e-08	13.4272	19.4028	Sort1	FALSE	FALSE	30141	NM_001271599	+	0	0	1	0	0	62.8333	4
chr3.113277001.113277120	chr3	113277001	113277120	9.97601e-06	2.50534e-05	6.22704e-05	1	1	11.1761	19.9792	0.0239149	2.66011e-05	15.0374	24.7506	Amy1	TRUE	FALSE	561	NM_007446	-	1	0	1	0	0	24.8333	1
chr3.129276601.129276720	chr3	129276601	129276720	2.26728e-08	4.53455e-08	1.57102e-07	1	1	20.7124	16.4851	1.51136e-06	0.000697647	17.4712	16.0143	Elovl6	FALSE	FALSE	41299	NM_130450	+	0	0	1	0	0	11.8333	1
chr3.141161401.141161520	chr3	141161401	141161520	2.26728e-08	4.53455e-08	1.57102e-07	1	1	14.6129	27.6235	0.00684451	6.18648e-08	17.6221	29.4255	Unc5c	FALSE	FALSE	32875	NM_009472	+	0	0	1	0	0	21	1
chr4.44169361.44169480	chr4	44169361	44169480	2.26728e-08	4.53455e-08	1.57102e-07	1	1	12.3173	12.6209	2.20524e-05	2.26498e-05	13.1969	11.9586	Rnf38	FALSE	FALSE	10931	NM_175201	-	0	0	1	0	0	59.1667	1
chr4.49297801.49297920	chr4	49297801	49297920	0.000480073	0.00114391	0.00215578	1	1	11.9674	10.0575	0.00403596	0.0107504	18.6821	15.7901	E130309F12Rik	FALSE	FALSE	123104	NM_145368	-	0	0	1	0	0	30.8333	4
chr4.49399921.49400040	chr4	49399921	49400040	1e-20	1e-20	3.86111e-20	1	1	16.4881	17.1358	3.6733e-06	1.95147e-07	11.1554	16.2569	c("LOC100418419", "Acnat2")	FALSE	FALSE	20984	NM_145368	-	0	0	1	0	0	43.3333	1
chr4.57874321.57874440	chr4	57874321	57874440	3.62764e-07	8.38892e-07	2.62614e-06	1	1	17.6996	12.3602	2.97512e-06	0.00341926	10.3728	10.838	Akap2	FALSE	FALSE	6889	NM_001035533	+	0	0	1	0	0	26.3333	1
chr4.102785761.102785880	chr4	102785761	102785880	0.000674016	0.00159589	0.0029292	1	1	14.1161	13.8053	0.00489366	0.0129252	16.0438	21.1362	Wdr78	FALSE	FALSE	1025	NM_146254	-	0	0	1	0	1	22.3333	1
chr4.106443361.106443480	chr4	106443361	106443480	2.26728e-08	4.53455e-08	1.57102e-07	1	1	15.7204	13.6925	1.77453e-05	2.24573e-05	14.4841	18.0457	Acot11	FALSE	FALSE	28957	NM_025590	-	0	1	1	0	0	38.3333	3
chr4.114584521.114584640	chr4	114584521	114584640	2.26728e-08	4.53455e-08	1.57102e-07	1	1	16.842	22.5189	0.000193117	1.58512e-06	12.6266	21.6458	9130206I24Rik	FALSE	FALSE	2629	NR_030721	+	0	0	1	0	0	25.8333	1
chr4.126755281.126755400	chr4	126755281	126755400	1e-20	1e-20	3.86111e-20	1	1	16.289	27.4797	2.84443e-05	8.88178e-16	14.8069	25.8729	Zmym6	TRUE	FALSE	656	NM_177462	+	1	0	1	0	1	33	1
chr4.132745441.132745560	chr4	132745441	132745560	4.76128e-07	1.13364e-06	3.4866e-06	1	1	10.9884	16.6835	0.00159258	8.3692e-06	13.8223	20.2848	Wasf2	FALSE	FALSE	22892	NM_008154	-	0	0	1	0	0	45	4
chr4.137283601.137283720	chr4	137283601	137283720	1e-20	1e-20	3.86111e-20	1	1	12.8833	20.2362	1.37644e-06	4.06702e-08	13.2861	28.0595	Rap1gap	FALSE	FALSE	46021	NM_001081155	+	0	1	1	0	0	26.5	6
chr4.137433361.137433480	chr4	137433361	137433480	2.7434e-06	6.86984e-06	1.86386e-05	1	1	16.1565	14.3055	0.00024485	0.000545693	14.4515	14.6212	Ece1	FALSE	FALSE	15211	NM_199307	+	0	0	1	0	0	27.5	1
chr4.144493681.144493800	chr4	144493681	144493800	1e-20	1e-20	3.86111e-20	1	1	15.395	17.5598	2.2304e-05	3.72126e-07	17.9342	19.8805	Dhrs3	FALSE	FALSE	10643	NM_011303	+	0	0	1	0	0	41.3333	1
chr4.149511241.149511360	chr4	149511241	149511360	9.49988e-06	2.38291e-05	5.94232e-05	1	1	12.3747	12.0037	0.00081361	0.000747339	11.3105	12.5357	Slc2a5	FALSE	FALSE	-11721	NM_001085529	+	0	0	1	0	0	31.3333	2
chr4.149526841.149526960	chr4	149526841	149526960	2.26728e-08	4.53455e-08	1.57102e-07	1	1	12.4509	23.1573	0.00433802	1.55684e-07	19.0232	13.1389	Slc2a7	FALSE	FALSE	3762	NM_001085529	+	0	0	1	0	0	18.1667	1
chr4.149833921.149834040	chr4	149833921	149834040	2.26728e-08	4.53455e-08	1.57102e-07	1	1	15.1714	18.4591	0.000114025	1.04844e-06	18.3875	18.3483	Rere	FALSE	FALSE	177898	NM_001085492	+	0	0	1	0	0	26.5	1
chr4.150699961.150700080	chr4	150699961	150700080	0.000337937	0.000810891	0.0015695	1	1	14.9152	17.3718	0.0123486	0.00240292	10.7953	16.0389	Camta1	FALSE	FALSE	-267900	NM_009498	-	0	0	1	0	0	17.8333	1
chr5.65807281.65807400	chr5	65807281	65807400	1e-20	1e-20	3.86111e-20	1	1	14.4223	15.0923	3.80237e-06	4.26649e-06	16.082	12.9064	Ugdh	FALSE	FALSE	19682	NM_009466	-	0	0	1	0	0	58.3333	2
chr5.87349921.87350040	chr5	87349921	87350040	2.26728e-08	4.53455e-08	1.57102e-07	1	1	15.1637	16.1143	0.000323038	4.5685e-07	14.4962	20.1092	Ugt2b1	FALSE	FALSE	5489	NM_152811	-	0	0	1	0	0	24.3333	1
chr5.98773801.98773920	chr5	98773801	98773920	3.46893e-06	8.66099e-06	2.3094e-05	1	1	13.0617	13.1024	0.000381285	0.00048423	12.9263	10.3086	1700007G11Rik	FALSE	FALSE	15480	NM_001024614	+	0	0	1	0	0	38.1667	1
chr5.109107121.109107240	chr5	109107121	109107240	3.62764e-07	8.38892e-07	2.62614e-06	1	1	11.5381	16.3477	0.00445606	2.14759e-06	10.0951	18.6183	Idua	FALSE	FALSE	-2454	NM_174870	-	0	0	1	0	1	34.3333	2
chr5.112935601.112935720	chr5	112935601	112935720	1e-20	1e-20	3.86111e-20	1	1	18.322	10.3496	6.39163e-10	0.00781591	15.4347	11.6845	Sez6l	FALSE	FALSE	57157	NM_001177504	+	0	0	1	0	0	53	2
chr5.112939201.112939320	chr5	112939201	112939320	1e-20	1e-20	3.86111e-20	1	1	15.6077	11.7379	6.78759e-09	0.000116267	12.6267	13.746	Sez6l	FALSE	FALSE	60757	NM_001177504	+	0	0	1	0	0	57.8333	1
chr5.113520001.113520120	chr5	113520001	113520120	1.86597e-05	4.67059e-05	0.000111501	1	1	12.2726	15.2426	0.00805407	0.0001485	18.0266	11.2835	2900026A02Rik	FALSE	FALSE	-9398	NM_021352	-	0	1	1	0	0	21.5	3
chr5.113582521.113582640	chr5	113582521	113582640	1e-20	1e-20	3.86111e-20	1	1	29.1539	12.3799	3.61127e-10	0.00824612	32.6523	15.6197	2900026A02Rik	FALSE	FALSE	9694	NM_172884	-	0	0	1	0	0	23	1
chr5.117866521.117866640	chr5	117866521	117866640	3.62764e-07	8.38892e-07	2.62614e-06	1	1	16.8952	19.0933	0.000420154	2.3994e-05	20.5409	15.6456	Ksr2	FALSE	FALSE	2512	NM_001114545	+	0	0	1	0	0	25.3333	1
chr5.117972601.117972720	chr5	117972601	117972720	4.96533e-06	1.24247e-05	3.23625e-05	1	1	14.3102	10.5868	0.000122779	0.00227847	16.0299	11.1302	Ksr2	FALSE	FALSE	108592	NM_001114545	+	0	0	1	0	0	37.5	2
chr5.119063041.119063160	chr5	119063041	119063160	1e-20	1e-20	3.86111e-20	1	1	22.7477	21.6858	4.81178e-08	3.02906e-07	17.5567	14.4456	Med13l	FALSE	FALSE	52315	NM_172424	+	0	0	1	0	0	28.8333	3
chr5.139677841.139677960	chr5	139677841	139677960	1e-20	1e-20	3.86111e-20	1	1	12.8834	13.801	2.79411e-06	1.12232e-06	16.3608	21.5518	Sun1	FALSE	FALSE	1252	NM_024451	+	0	0	1	0	1	59	3
chr5.141120841.141120960	chr5	141120841	141120960	2.33076e-05	5.80196e-05	0.000136417	1	1	12.2408	13.6477	0.0046984	0.00032213	12.3235	15.7583	Ttyh3	FALSE	FALSE	4026	NM_175274	-	0	0	1	0	0	23.1667	5
chr5.145673761.145673880	chr5	145673761	145673880	0.000773232	0.00182464	0.00331312	1	1	12.5445	10.342	0.00204064	0.0360715	16.1917	14.0962	Smurf1	FALSE	FALSE	52820	NM_029438	-	0	0	1	0	0	29	1
chr5.148304881.148305000	chr5	148304881	148305000	0.000133928	0.000325762	0.000676281	1	1	17.8476	12.7377	0.0006443	0.0165027	22.0365	15.6431	Pan3	FALSE	FALSE	62727	NM_028291	+	0	0	1	0	0	16.6667	1
chr5.149780761.149780880	chr5	149780761	149780880	2.26728e-08	4.53455e-08	1.57102e-07	1	1	23.0033	10.785	3.63904e-08	0.00717913	14.0396	11.2434	1810059H22Rik	FALSE	FALSE	18937	NR_040686	+	0	0	0	0	0	37.8333	2
chr5.151381321.151381440	chr5	151381321	151381440	0.000192265	0.000464111	0.000937499	1	1	11.2359	12.6064	0.00842332	0.00188796	16.0112	17.4741	N4bp2l1	FALSE	FALSE	15661	NM_133898	-	0	0	1	0	0	27.5	3
chr6.4699441.4699560	chr6	4699441	4699560	6.93786e-06	1.75714e-05	4.4808e-05	1	1	10.2528	10.5686	0.000638948	0.000645384	14.6522	14.3142	Peg10	FALSE	FALSE	2137	NM_001040611	+	0	0	1	0	1	48.1667	4
chr6.29783641.29783760	chr6	29783641	29783760	2.26728e-08	4.53455e-08	1.57102e-07	1	1	21.5953	13.3237	2.47802e-07	0.000688888	11.0402	11.6709	Ahcyl2	FALSE	FALSE	-25836	NM_001171001	+	0	0	1	0	0	32.3333	1
chr6.30213361.30213480	chr6	30213361	30213480	3.85437e-07	9.52256e-07	2.9576e-06	1	1	11.6196	18.727	0.00654829	1.78936e-06	16.0577	18.6495	Ube2h	FALSE	FALSE	-19559	NM_001169577	-	0	0	1	0	0	32.3333	1
chr6.31476961.31477080	chr6	31476961	31477080	1e-20	1e-20	3.86111e-20	1	1	13.8082	11.9769	9.8389e-08	1.66779e-06	12.9574	12.8081	Podxl	FALSE	FALSE	36858	NM_013723	-	0	0	1	0	0	67	3
chr6.48693121.48693240	chr6	48693121	48693240	5.21473e-07	1.26967e-06	3.87034e-06	1	1	12.3029	18.0693	0.00211724	7.12668e-06	29.5235	18.6407	Gimap1	FALSE	TRUE	-2956	NM_175035	+	0	1	0	1	1	24.1667	5
chr6.56800201.56800320	chr6	56800201	56800320	1e-20	1e-20	3.86111e-20	1	1	19.4013	18.0188	2.72749e-06	3.00983e-05	12.3556	11.2612	Fkbp9	FALSE	FALSE	18150	NM_012056	+	0	0	1	0	0	28.6667	2
chr6.86080321.86080440	chr6	86080321	86080440	1e-20	1e-20	3.86111e-20	1	1	30.3562	16.6109	7.86038e-14	3.11754e-05	18.4711	19.1981	LOC100503219	FALSE	FALSE	52281	NM_013458	+	0	0	0	0	0	28	2
chr6.87582361.87582480	chr6	87582361	87582480	1.32862e-05	3.3465e-05	8.16453e-05	1	1	10.256	10.8256	0.000804763	0.00105299	10.1083	14.5676	Aplf	FALSE	FALSE	39683	NM_001170489	-	0	0	1	0	0	56.6667	1
chr6.88432921.88433040	chr6	88432921	88433040	1e-20	1e-20	3.86111e-20	1	1	14.5855	15.4622	1.29266e-05	4.18424e-06	13.4077	17.8665	Ruvbl1	FALSE	FALSE	17506	NM_019685	+	0	1	1	0	0	41	1
chr6.91644601.91644720	chr6	91644601	91644720	3.25807e-05	8.09644e-05	0.000186216	1	1	10.4566	15.447	0.0392193	5.47434e-05	10.7505	14.0409	Slc6a6	FALSE	FALSE	10542	NM_009320	+	0	0	1	0	0	20.6667	1
chr6.97953121.97953240	chr6	97953121	97953240	2.26728e-08	4.53455e-08	1.57102e-07	1	1	19.8137	17.6747	2.31562e-06	6.19317e-05	19.2008	17.4868	Mitf	FALSE	FALSE	11346	NM_008601	+	0	0	1	0	0	5.83333	1
chr6.113472961.113473080	chr6	113472961	113473080	1e-20	1e-20	3.86111e-20	1	1	18.4493	16.9081	1.19768e-06	5.59053e-05	11.7936	16.0191	Tmem111	FALSE	FALSE	8553	NM_175101	-	0	0	1	0	0	37.8333	1
chr6.142518241.142518360	chr6	142518241	142518360	1e-20	1e-20	3.86111e-20	1	1	21.5827	14.1256	2.82424e-10	3.83387e-05	14.8347	16.8232	Kcnj8	FALSE	FALSE	1517	NM_008428	-	0	0	1	0	1	40.8333	1
chr6.142836841.142836960	chr6	142836841	142836960	0.000370246	0.00088621	0.00170344	1	1	15.7576	16.0059	0.00940783	0.00347238	12.6251	13.5807	St8sia1	FALSE	FALSE	74092	NR_045707	+	0	0	1	0	0	9.33333	1
chr6.144958561.144958680	chr6	144958561	144958680	1e-20	1e-20	3.86111e-20	1	1	21.8144	18.1524	3.69728e-06	8.43104e-07	23.6367	20.2624	Bcat1	FALSE	FALSE	38653	NM_001024468	-	0	1	1	0	0	25.3333	1
chr7.6155761.6155880	chr7	6155761	6155880	2.26728e-08	4.53455e-08	1.57102e-07	1	1	13.0966	16.521	0.000187953	4.82349e-06	20.5503	23.0994	Galp	FALSE	FALSE	7071	NM_178028	+	0	0	1	0	0	43	2
chr7.19843081.19843200	chr7	19843081	19843200	1e-20	1e-20	3.86111e-20	1	1	19.3657	28.8815	2.80929e-09	4.44089e-16	10.199	27.5506	Vasp	FALSE	FALSE	14004	NM_009499	-	0	1	1	0	0	13.8333	1
chr7.26573161.26573280	chr7	26573161	26573280	1e-20	1e-20	3.86111e-20	1	1	13.7805	24.6973	2.33827e-05	7.77156e-16	11.1812	23.9649	Axl	TRUE	FALSE	473	NM_009465	-	1	0	1	0	0	23	4
chr7.52995361.52995480	chr7	52995361	52995480	3.17419e-07	7.48201e-07	2.35967e-06	1	1	11.6529	15.493	0.000930729	9.47782e-06	10.539	17.9412	Sult2b1	FALSE	FALSE	-14176	NM_027055	-	0	0	1	0	0	46.5	6
chr7.56783041.56783160	chr7	56783041	56783160	2.26728e-08	4.53455e-08	1.57102e-07	1	1	19.6512	16.2738	1.1565e-05	8.47042e-05	18.5738	18.2928	Nav2	FALSE	FALSE	109046	NM_001005232	-	0	0	1	0	0	7.83333	1
chr7.70244041.70244160	chr7	70244041	70244160	1e-20	1e-20	3.86111e-20	1	1	16.8354	15.7052	5.17613e-07	4.65249e-07	10.3209	11.1968	Chrna7	FALSE	FALSE	113253	NM_007390	-	0	1	0	0	0	49.1667	1
chr7.72948001.72948120	chr7	72948001	72948120	5.03335e-06	1.26287e-05	3.28066e-05	1	1	18.3256	12.3106	4.15775e-05	0.00712733	21.7996	14.8472	LOC100503969	FALSE	FALSE	-818	NR_045301	+	1	0	0	0	0	25.8333	1
chr7.75230161.75230280	chr7	75230161	75230280	1e-20	1e-20	3.86111e-20	1	1	11.2357	27.778	0.00314718	6.10623e-15	11.4839	30.6298	Igf1r	FALSE	FALSE	133020	NM_010513	+	0	0	1	0	0	24	2
chr7.77501161.77501280	chr7	77501161	77501280	1e-20	1e-20	3.86111e-20	1	1	19.041	21.752	6.69685e-05	1.01618e-06	21.5292	25.6357	Nr2f2	FALSE	FALSE	4200	NM_009697	-	0	0	1	0	1	19.5	1
chr7.82758361.82758480	chr7	82758361	82758480	1e-20	1e-20	3.86111e-20	1	1	14.4047	13.8554	1.26696e-05	4.5903e-06	13.8199	11.1132	Akap13	FALSE	FALSE	157943	NM_029332	+	0	0	1	0	0	10.8333	1
chr7.126657001.126657120	chr7	126657001	126657120	2.26728e-08	4.53455e-08	1.57102e-07	1	1	14.4473	10.6234	7.61987e-07	0.000328215	12.0965	13.016	Pdilt	FALSE	FALSE	9877	NM_027943	-	0	0	1	0	0	75.3333	1
chr7.127873441.127873560	chr7	127873441	127873560	4.53455e-08	1.13364e-07	3.87042e-07	1	1	12.7108	12.513	3.34646e-05	7.29123e-05	11.5491	14.7546	BC030336	FALSE	FALSE	-9511	NM_177697	+	0	0	1	0	0	59.8333	1
chr7.134593201.134593320	chr7	134593201	134593320	2.26728e-08	4.53455e-08	1.57102e-07	1	1	11.2335	22.5425	0.00883101	4.54434e-08	12.5204	24.1382	B130055M24Rik	TRUE	FALSE	-530	NM_175163	-	1	0	0	0	1	21.5	1
chr7.135849481.135849600	chr7	135849481	135849600	1e-20	1e-20	3.86111e-20	1	1	18.6928	12.8772	8.5096e-08	1.84671e-06	13.0388	12.576	1110007A13Rik	FALSE	FALSE	34344	NM_145955	-	0	0	1	0	0	13.3333	1
chr7.146039041.146039160	chr7	146039041	146039160	2.26728e-08	4.53455e-08	1.57102e-07	1	1	11.3596	14.7275	0.000758356	1.33358e-06	12.27	15.4034	Ppp2r2d	TRUE	FALSE	974	NM_026391	+	1	0	1	0	1	20.5	2
chr7.150994921.150995040	chr7	150994921	150995040	0.000141523	0.00034356	0.000710178	1	1	14.2798	15.2985	0.0085157	0.00132662	13.1149	17.0363	Nadsyn1	FALSE	FALSE	13707	NM_030221	-	0	0	1	0	0	19.6667	1
chr8.4370401.4370520	chr8	4370401	4370520	1e-20	1e-20	3.86111e-20	1	1	16.0523	17.2581	1.19593e-07	1.25421e-07	11.8542	16.0489	Gm7434	FALSE	FALSE	20815	NM_009138	+	0	0	0	0	0	57.3333	1
chr8.8652361.8652480	chr8	8652361	8652480	6.80183e-06	1.71179e-05	4.3702e-05	1	1	10.6524	10.7397	0.000463636	0.000870597	12.6973	10.5192	Efnb2	FALSE	FALSE	8294	NM_010111	-	0	0	1	0	0	53.1667	1
chr8.13411561.13411680	chr8	13411561	13411680	6.80183e-07	1.67778e-06	5.03138e-06	1	1	10.2686	10.8768	0.000515508	3.92115e-05	12.8772	10.9067	Grk1	FALSE	FALSE	6482	NM_011881	+	0	0	1	0	0	23	2
chr8.23621521.23621640	chr8	23621521	23621640	1e-20	1e-20	3.86111e-20	1	1	10.1699	11.5201	1.24473e-09	2.06977e-07	10.2918	13.9936	Slc20a2	FALSE	FALSE	-34171	NM_001012667	-	0	0	1	0	0	125	3
chr8.47878201.47878320	chr8	47878201	47878320	1e-20	1e-20	3.86111e-20	1	1	19.724	12.5466	2.10988e-07	0.000380795	20.7298	16.7717	Irf2	FALSE	FALSE	53104	NM_008391	+	0	0	1	0	0	26.5	1
chr8.55611241.55611360	chr8	55611241	55611360	3.46893e-06	8.66099e-06	2.3094e-05	1	1	12.9846	10.5878	0.000131603	0.00140087	14.5262	10.6951	Spcs3	FALSE	FALSE	3992	NM_029701	-	0	0	1	0	0	41.6667	1
chr8.81034561.81034680	chr8	81034561	81034680	4.62524e-06	1.14724e-05	3.0024e-05	1	1	20.7026	11.9945	1.68958e-05	0.015057	18.4877	14.3126	Slc10a7	FALSE	FALSE	1329	NM_029736	+	0	0	1	0	1	16	1
chr8.87427561.87427680	chr8	87427561	87427680	1e-20	1e-20	3.86111e-20	1	1	14.6351	12.8827	6.5567e-06	8.4034e-06	14.806	14.8297	Klf1	FALSE	FALSE	1736	NM_010635	+	0	0	1	0	1	9.16667	3
chr8.91559161.91559280	chr8	91559161	91559280	1e-20	1e-20	3.86111e-20	1	1	22.4574	14.3359	4.60242e-09	0.00111314	11.5256	11.5738	Sall1	FALSE	FALSE	8782	NM_021390	-	0	0	1	0	0	31.3333	1
chr8.109169041.109169160	chr8	109169041	109169160	3.28755e-05	8.17353e-05	0.000187868	1	1	15.6794	15.2705	0.00176333	0.00123363	16.0257	17.3795	Cdh1	FALSE	FALSE	-37808	NM_173037	+	0	0	1	0	0	12.6667	1
chr8.121172761.121172880	chr8	121172761	121172880	1e-20	1e-20	3.86111e-20	1	1	14.2936	20.5318	3.01306e-05	1.54812e-07	11.8514	18.5214	Cdh13	FALSE	FALSE	365108	NM_019707	+	0	0	1	0	0	34.3333	1
chr8.122341081.122341200	chr8	122341081	122341200	1e-20	1e-20	3.86111e-20	1	1	12.0742	12.1101	5.76576e-05	1.25481e-07	12.0204	10.7667	Cotl1	FALSE	FALSE	23280	NM_028071	-	0	0	1	0	0	11.5	1
chr9.8133241.8133360	chr9	8133241	8133360	4.94266e-06	1.23793e-05	3.22634e-05	1	1	11.7746	15.5029	0.00374253	7.34163e-05	12.109	18.9767	AK129341	TRUE	FALSE	935	NM_001045524	-	1	0	1	0	1	36.8333	1
chr9.36665641.36665760	chr9	36665641	36665760	1e-20	1e-20	3.86111e-20	1	1	16.4021	27.8638	0.00112557	7.74094e-08	10.9441	29.994	Fez1	FALSE	FALSE	14399	NM_183171	+	0	0	1	0	0	15	1
chr9.46082641.46082760	chr9	46082641	46082760	3.17419e-07	7.48201e-07	2.35967e-06	1	1	12.5877	17.5224	0.000536891	1.44248e-05	10.8738	18.5071	Zfp259	FALSE	FALSE	1496	NM_011752	+	0	1	1	0	1	39	1
chr9.47572681.47572800	chr9	47572681	47572800	1.26967e-06	3.12884e-06	8.97561e-06	1	1	11.6461	16.5247	0.00252361	1.88953e-05	11.1446	11.6617	Cadm1	FALSE	FALSE	53492	NR_046048	-	0	0	1	0	0	24	2
chr9.48623281.48623400	chr9	48623281	48623400	9.52256e-07	2.35797e-06	6.91039e-06	1	1	11.5775	14.7264	0.00272699	1.02117e-05	12.1223	12.5961	Zbtb16	FALSE	FALSE	20651	NM_001033324	-	0	0	1	0	0	36.3333	1
chr9.57789241.57789360	chr9	57789241	57789360	1e-20	1e-20	3.86111e-20	1	1	17.0383	14.8897	6.28278e-06	2.02635e-07	12.8629	15.0317	Sema7a	FALSE	FALSE	1301	NM_011352	+	0	0	1	0	1	19	2
chr9.65066401.65066520	chr9	65066401	65066520	1e-20	1e-20	3.86111e-20	1	1	25.3053	10.9901	3.88578e-14	0.00842691	26.197	10.3506	Parp16	FALSE	FALSE	3906	NM_177460	+	0	0	1	0	0	44	1
chr9.65755921.65756040	chr9	65755921	65756040	4.39851e-06	1.09056e-05	2.86321e-05	1	1	16.3486	12.9008	7.99977e-05	0.00304115	12.9879	17.8994	Trip4	TRUE	FALSE	562	NM_019797	-	1	0	1	0	1	28.6667	1
chr9.66873001.66873120	chr9	66873001	66873120	1.29235e-06	3.19686e-06	9.14949e-06	1	1	10.4322	14.5117	0.000952704	5.30112e-05	16.4055	12.4424	Tpm1	FALSE	FALSE	18559	NM_001164256	-	0	0	1	0	0	52	2
chr9.89126281.89126400	chr9	89126281	89126400	7.41399e-06	1.8705e-05	4.74927e-05	1	1	10.8687	14.1533	0.00661682	6.74195e-05	11.2766	15.3719	Mthfs	FALSE	FALSE	20255	NM_026829	+	0	0	1	0	0	35.8333	2
chr9.99463921.99464040	chr9	99463921	99464040	1e-20	1e-20	3.86111e-20	1	1	24.5679	19.5006	3.16071e-10	3.23508e-07	25.4078	18.9671	Armc8	FALSE	FALSE	5279	NM_001166138	-	0	0	1	0	0	38.6667	2
chr9.105722041.105722160	chr9	105722041	105722160	2.26728e-08	4.53455e-08	1.57102e-07	1	1	13.0493	14.545	3.31178e-05	1.89146e-05	13.308	13.834	Col6a6	FALSE	FALSE	8256	NM_001102607	-	0	0	1	0	0	47	1
chr9.108462001.108462120	chr9	108462001	108462120	2.494e-07	6.34837e-07	2.01792e-06	1	1	19.8692	16.6573	1.51572e-05	0.000401913	21.3868	13.2546	Qrich1	TRUE	FALSE	-712	NM_011830	+	1	1	0	0	1	24.5	1
chr9.114997921.114998040	chr9	114997921	114998040	1e-20	1e-20	3.86111e-20	1	1	17.6715	13.2379	8.31107e-10	3.16213e-06	17.7551	15.1207	Osbpl10	TRUE	FALSE	21526	NM_148958	+	0	0	1	0	0	74.6667	7
chr9.121367521.121367640	chr9	121367521	121367640	1e-20	1e-20	3.86111e-20	1	1	11.3936	15.6119	0.000489084	5.11102e-08	12.2031	14.9166	Trak1	FALSE	FALSE	37168	NM_031161	-	0	0	1	0	0	59	3
chr9.123124681.123124800	chr9	123124681	123124800	1e-20	1e-20	3.86111e-20	1	1	10.9404	13.5449	1.48983e-06	3.50678e-08	15.0047	11.6908	Cdcp1	TRUE	TRUE	357	NM_133974	-	1	0	1	0	1	80.6667	4
chrX.8596681.8596800	chrX	8596681	8596800	8.41159e-05	0.000206367	0.000442879	1	1	12.9268	12.0041	0.00287443	0.00218896	12.5483	13.8262	Gm9431	FALSE	FALSE	-13812	NM_031261	+	0	0	0	0	0	27.5	4
chrX.10126801.10126920	chrX	10126801	10126920	1e-20	1e-20	3.86111e-20	1	1	23.6768	15.4909	6.99433e-08	0.000667619	26.4479	27.0272	Tspan7	FALSE	FALSE	64561	NM_019634	+	0	0	1	0	0	28.3333	1
chrX.39011401.39011520	chrX	39011401	39011520	1e-20	1e-20	3.86111e-20	1	1	14.323	24.0684	0.00130317	7.15382e-08	20.1113	24.0323	Gria3	FALSE	FALSE	253559	NM_001033422	-	0	0	1	0	0	30.1667	1
chrX.117404041.117404160	chrX	117404041	117404160	1e-20	1e-20	3.86111e-20	1	1	19.4511	12.7942	3.55271e-15	1.91608e-07	18.0539	13.4284	Pcdh11x	TRUE	TRUE	107	NR_073452	+	1	1	0	1	0	19.5	7
chrX.126957961.126958080	chrX	126957961	126958080	1e-20	1e-20	3.86111e-20	1	1	13.271	15.1892	1.55333e-06	3.63339e-08	11.6954	13.0326	Diap2	FALSE	FALSE	673685	NM_172493	+	0	0	1	0	0	80.8333	1
chrX.155694601.155694720	chrX	155694601	155694720	1e-20	1e-20	3.86111e-20	1	1	10.2739	13.3332	1.64496e-05	1.93907e-06	16.6133	21.3113	Rps6ka3	TRUE	TRUE	551	NM_148945	+	1	0	1	1	1	32	7
chrX.156391801.156391920	chrX	156391801	156391920	2.26728e-08	4.53455e-08	1.57102e-07	1	1	19.473	18.528	1.31774e-05	0.000110103	10.8774	13.7876	Sh3kbp1	FALSE	FALSE	-34445	NM_001163085	+	0	0	1	0	0	15	1
chrX.159266401.159266520	chrX	159266401	159266520	1.10643e-05	2.77741e-05	6.85441e-05	1	1	17.1911	13.2358	0.000391968	0.0018171	16.6891	18.1348	4932441K18Rik	TRUE	FALSE	812	NM_178935	-	1	0	1	0	1	17.1667	1

## Sheet: Hypo.MetaAnalysis
	Chromosome	Start	End	stat	p.value	FDR	Weight.1	weight.2	effect.size.1	effect.size.2	p.value.1	p.value.2	Gene	Trimmed.mean.difference.1	Trimmed.mean.difference.2	Promoter.indicator	CpG.indicator	dist.to.feature	feature.name	feature.strand	prom	exon	intron	CpGi	shores	mean.coverage.by.gene.early	No.CpG.window
chr1.53831281.53831400	chr1	53831281	53831400	1.65511e-06	4.05842e-06	1.13809e-05	1	1	-15.9461	-18.5816	0.000633372	0.00012103	Stk17b	-18.1724	-20.8157	FALSE	FALSE	10660	NM_133810	-	0	0	1	0	0	12	1
chr1.54980641.54980760	chr1	54980641	54980760	1.58709e-06	3.89971e-06	1.09939e-05	1	1	-11.3457	-10.2683	0.000103912	0.000654084	Ankrd44	-15.3554	-12.2318	FALSE	FALSE	2472	NM_001081433	-	0	0	1	0	1	62.5	3
chr1.58854481.58854600	chr1	58854481	58854600	3.21953e-06	8.0715e-06	2.16637e-05	1	1	-16.7937	-15.0233	0.000165972	0.000986942	Casp8	-19.2607	-12.7538	FALSE	FALSE	2265	NM_009812	+	0	0	1	0	1	19.8333	1
chr10.50629321.50629440	chr10	50629321	50629440	2.26728e-08	4.53455e-08	1.57102e-07	1	1	-18.3819	-20.621	3.00892e-05	2.59992e-05	Sim1	-15.5547	-10.1661	FALSE	FALSE	13866	NM_011376	+	0	1	1	0	0	22.8333	2
chr10.77470081.77470200	chr10	77470081	77470200	0.000189068	0.000456629	0.000923561	1	1	-14.5735	-12.7171	0.00165861	0.00942287	Pfkl	-15.5572	-12.2631	FALSE	FALSE	2342	NM_008826	-	0	0	1	0	1	9.33333	3
chr10.85038841.85038960	chr10	85038841	85038960	1.10416e-05	2.77061e-05	6.83969e-05	1	1	-15.7013	-11.1357	8.67458e-05	0.00814009	Btbd11	-12.6867	-11.793	FALSE	FALSE	-22196	NM_001017525	+	0	0	1	0	0	37.3333	1
chr10.90289681.90289800	chr10	90289681	90289800	1.67778e-06	4.10377e-06	1.14926e-05	1	1	-19.3434	-13.1229	8.14587e-06	0.00989426	Anks1b	-22.7579	-19.2369	FALSE	FALSE	250247	NM_001177396	+	0	0	1	0	1	28	2
chr10.106350241.106350360	chr10	106350241	106350360	1e-20	1e-20	3.86111e-20	1	1	-18.7684	-19.377	2.73961e-07	3.5843e-06	Ppfia2	-18	-18.7427	FALSE	FALSE	210361	NM_198636	-	0	0	1	0	0	15.1667	2
chr10.127933201.127933320	chr10	127933201	127933320	1e-20	1e-20	3.86111e-20	1	1	-16.8594	-17.6811	1.45996e-06	1.26359e-07	Myl6b	-16.1949	-16.5715	FALSE	FALSE	-2321	NM_010860	-	0	1	1	0	0	31.6667	2
chr11.46512481.46512600	chr11	46512481	46512600	1e-20	1e-20	3.86111e-20	1	1	-20.3338	-12.3791	9.47889e-10	0.000251889	Timd2	-15.349	-14.7951	TRUE	FALSE	-150	NM_001161355	-	1	0	1	0	0	45.1667	2
chr11.70782121.70782240	chr11	70782121	70782240	1e-20	1e-20	3.86111e-20	1	1	-20.9373	-10.0254	5.22687e-10	0.0179115	Nup88	-16.4965	-10.4346	FALSE	FALSE	1236	NR_075087	-	0	0	1	0	1	40.8333	2
chr11.75352441.75352560	chr11	75352441	75352560	1e-20	1e-20	3.86111e-20	1	1	-14.932	-20.7761	2.05082e-09	4.56302e-14	Slc43a2	-12.2471	-18.1228	FALSE	FALSE	6829	NM_001199283	+	0	0	1	0	0	83.3333	2
chr11.82833361.82833480	chr11	82833361	82833480	1e-20	1e-20	3.86111e-20	1	1	-11.1783	-22.8782	1.69575e-06	2.22045e-16	Slfn8	-10.6303	-20.145	TRUE	FALSE	745	NM_001167743	-	1	1	1	0	0	91.5	4
chr11.83037361.83037480	chr11	83037361	83037480	0.000107355	0.000262233	0.000553214	1	1	-13.0159	-11.6674	0.000709411	0.0116149	AI662270	-11.7399	-11.4406	TRUE	FALSE	285	NR_015519	+	1	0	1	0	0	8.16667	1
chr11.87936241.87936360	chr11	87936241	87936360	1.04295e-06	2.56202e-06	7.4652e-06	1	1	-21.9696	-14.108	9.65468e-06	0.00332805	Cuedc1	-34.7031	-17.4262	FALSE	FALSE	23595	NM_198013	+	0	0	1	0	0	15.6667	2
chr11.100685281.100685400	chr11	100685281	100685400	6.12164e-07	1.4964e-06	4.51492e-06	1	1	-11.4897	-17.8896	0.00222643	8.41e-06	Stat5b	-11.3269	-11.9405	FALSE	FALSE	-1398	NM_011489	-	0	0	1	0	0	16.1667	1
chr11.102259201.102259320	chr11	102259201	102259320	0.000879204	0.00207154	0.00372361	1	1	-12.793	-10.7797	0.00758575	0.0112175	Rundc3a	-10.3731	-11.8152	FALSE	FALSE	4486	NM_001252347	+	0	0	1	0	1	17.8333	2
chr11.102955321.102955440	chr11	102955321	102955440	1e-20	1e-20	3.86111e-20	1	1	-11.29	-23.7774	0.000378648	3.33067e-16	Plcd3	-13.332	-21.5724	FALSE	FALSE	7533	NM_152813	-	0	0	1	0	0	53	4
chr11.104262601.104262720	chr11	104262601	104262720	9.52256e-07	2.35797e-06	6.91039e-06	1	1	-16.6774	-14.5607	5.38309e-05	0.000519959	1700081L11Rik	-12.7417	-13.0847	FALSE	FALSE	40886	NM_001081045	-	0	0	1	0	0	9.16667	1
chr11.113051881.113052000	chr11	113051881	113052000	3.28755e-06	8.23021e-06	2.20464e-05	1	1	-11.9379	-12.7801	0.00041464	0.000405568	2610035D17Rik	-14.8145	-15.9665	FALSE	FALSE	11153	NR_015556	-	0	0	1	0	0	45.6667	1
chr11.115110601.115110720	chr11	115110601	115110720	4.0811e-07	9.97601e-07	3.08811e-06	1	1	-10.3182	-11.9137	0.000267364	4.70998e-05	Grin2c	-16.0804	-15.1121	FALSE	FALSE	17838	NM_010350	-	0	1	0	0	1	66.6667	2
chr11.115761001.115761120	chr11	115761001	115761120	2.26728e-08	4.53455e-08	1.57102e-07	1	1	-16.679	-10.4492	3.35888e-08	0.0104943	Recql5	-12.3469	-12.3517	TRUE	FALSE	-333	NM_183259	+	1	0	1	0	0	14.5	1
chr11.117205561.117205680	chr11	117205561	117205680	1e-20	1e-20	3.86111e-20	1	1	-20.5714	-15.3584	2.39515e-09	7.24151e-05	2015-09-09	-25.0004	-15.092	FALSE	FALSE	11936	NM_001113488	+	0	0	1	0	0	32.3333	2
chr11.118126801.118126920	chr11	118126801	118126920	1e-20	1e-20	3.86111e-20	1	1	-17.3997	-14.7128	6.04224e-06	3.17792e-06	Usp36	-15.9994	-17.0809	FALSE	FALSE	-16896	NM_001112699	-	0	0	1	0	0	34	1
chr11.119403601.119403720	chr11	119403601	119403720	3.78635e-06	9.40919e-06	2.49422e-05	1	1	-15.4115	-10.1004	3.36739e-05	0.00607163	Nptx1	-13.8894	-18.7259	FALSE	FALSE	5415	NM_008730	-	0	1	0	0	0	37.3333	4
chr12.103858321.103858440	chr12	103858321	103858440	9.90799e-06	2.48947e-05	6.19164e-05	1	1	-12.9517	-12.6836	0.000994172	0.000637815	Itpk1	-16.5858	-15.2402	FALSE	FALSE	64791	NR_035457	-	0	0	1	0	0	34.1667	2
chr12.104582041.104582160	chr12	104582041	104582160	1.58709e-07	3.85437e-07	1.2553e-06	1	1	-16.0871	-15.4423	1.20762e-05	0.000356708	Asb2	-20.6582	-10.9504	FALSE	FALSE	12052	NM_023049	-	0	0	1	0	0	29.1667	1
chr12.109673401.109673520	chr12	109673401	109673520	2.26728e-08	4.53455e-08	1.57102e-07	1	1	-17.6349	-20.0763	2.23446e-05	1.29151e-05	Eml1	-18.7886	-19.3184	FALSE	FALSE	12377	NM_001043335	+	0	0	1	0	0	23.1667	1
chr13.23555161.23555280	chr13	23555161	23555280	9.0691e-07	2.19926e-06	6.47452e-06	1	1	-12.0433	-14.1916	0.000188606	0.000129936	Btn1a1	-16.3514	-15.1012	FALSE	FALSE	2491	NM_013483	-	0	0	1	0	1	16.1667	1
chr13.32942161.32942280	chr13	32942161	32942280	1e-20	1e-20	3.86111e-20	1	1	-12.3671	-19.4069	0.000140558	2.761e-08	Serpinb1a	-10.2469	-20.5175	TRUE	FALSE	775	NM_025429	-	1	1	0	0	0	30.3333	1
chr13.49403761.49403880	chr13	49403761	49403880	1e-20	1e-20	3.86111e-20	1	1	-11.3378	-29.0468	0.00295578	5.11369e-13	Fgd3	-13.9642	-33.3357	TRUE	FALSE	698	NM_015759	-	1	0	1	0	0	36.8333	1
chr13.52692721.52692840	chr13	52692721	52692840	4.81116e-05	0.000118737	0.000265478	1	1	-12.4112	-10.1097	0.000808225	0.00420332	Sykb	-13.2907	-12.1384	TRUE	FALSE	472	NM_011518	+	1	0	1	0	0	34.5	1
chr13.59569561.59569680	chr13	59569561	59569680	1.40798e-05	3.54602e-05	8.62573e-05	1	1	-13.0216	-17.0503	0.00264174	0.000336298	Agtpbp1	-11.2593	-19.3976	FALSE	FALSE	89001	NM_023328	-	0	0	1	0	0	18	1
chr14.8769841.8769960	chr14	8769841	8769960	2.26728e-08	4.53455e-08	1.57102e-07	1	1	-10.968	-12.2669	9.67318e-05	2.54745e-06	Flnb	-11.0856	-12.4852	FALSE	TRUE	56737	NM_007870	-	0	0	1	0	0	67.5	4
chr14.21883681.21883800	chr14	21883681	21883800	1e-20	1e-20	3.86111e-20	1	1	-11.9633	-23.5537	0.000627675	1.22125e-15	Adk	-11.309	-23.556	FALSE	FALSE	-11574	NM_001243041	+	0	0	1	0	0	25.8333	1
chr14.25057801.25057920	chr14	25057801	25057920	0.00113749	0.00266373	0.00469006	1	1	-13.0578	-11.2447	0.00299213	0.0378933	Dlg5	-13.0004	-10.2445	FALSE	FALSE	7223	NM_001163513	-	0	0	1	0	0	15.6667	1
chr14.28124281.28124400	chr14	28124281	28124400	1e-20	1e-20	3.86111e-20	1	1	-16.5476	-11.9715	2.35373e-08	0.000116558	Arhgef3	-11.3385	-11.9112	FALSE	FALSE	73058	NM_027871	+	0	0	1	0	0	39.6667	1
chr14.61346641.61346760	chr14	61346641	61346760	2.26728e-08	4.53455e-08	1.57102e-07	1	1	-13.3516	-16.7614	0.00089311	1.40259e-07	Spata13	-12.074	-13.7146	FALSE	FALSE	-40211	NM_183175	+	0	0	1	0	0	36.1667	2
chr14.79991521.79991640	chr14	79991521	79991640	3.4916e-06	8.70634e-06	2.3195e-05	1	1	-11.927	-16.9432	0.00674264	2.74821e-05	Sugt1	-10.8878	-20.3924	FALSE	FALSE	4025	NM_026474	+	0	0	1	0	0	30.1667	2
chr14.120247801.120247920	chr14	120247801	120247920	1e-20	1e-20	3.86111e-20	1	1	-19.554	-22.9226	3.23677e-05	6.33359e-07	Hs6st3	-22.7217	-28.0778	FALSE	FALSE	99354	NR_045621	+	0	0	1	0	0	24.6667	2
chr15.5187721.5187840	chr15	5187721	5187840	4.49374e-05	0.000111006	0.000249484	1	1	-14.261	-12.6739	0.00193124	0.0016084	Ptger4	-17.8039	-13.1409	FALSE	FALSE	5843	NM_001136079	-	0	0	1	0	0	23.6667	1
chr15.25774801.25774920	chr15	25774801	25774920	1e-20	1e-20	3.86111e-20	1	1	-16.3433	-18.9078	9.5503e-05	2.18645e-07	Fam134b	-18.0834	-17.1965	FALSE	FALSE	1784	NM_001034851	+	0	0	1	0	1	32.3333	2
chr15.58872481.58872600	chr15	58872481	58872600	8.16219e-07	1.97253e-06	5.8608e-06	1	1	-16.52	-10.749	1.46221e-05	0.0015354	Mtss1	-15.1691	-13.3777	TRUE	FALSE	40982	NM_144800	-	0	0	1	0	0	42.8333	3
chr15.61937281.61937400	chr15	61937281	61937400	1e-20	1e-20	3.86111e-20	1	1	-16.0286	-10.7984	1.23919e-07	0.000483887	Pvt1	-15.6669	-19.9391	FALSE	FALSE	67741	NR_003368	+	0	0	1	0	0	60.5	1
chr15.67004761.67004880	chr15	67004761	67004880	1e-20	1e-20	3.86111e-20	1	1	-21.1244	-12.3971	1.54186e-08	0.000585587	St3gal1	-18.5725	-20.7055	FALSE	FALSE	3565	NM_009177	-	0	0	1	0	0	27.8333	2
chr15.103194841.103194960	chr15	103194841	103194960	1.65511e-06	4.05842e-06	1.13809e-05	1	1	-15.9854	-13.6031	9.53364e-05	0.000810077	Itga5	-14.6805	-10.9499	FALSE	FALSE	2220	NM_010577	-	0	0	1	0	1	32	1
chr16.16100161.16100280	chr16	16100161	16100280	4.76128e-07	1.13364e-06	3.4866e-06	1	1	-12.4026	-19.7065	0.00256213	5.40641e-06	c(2310008H04Rik, LOC100416953)	-11.9498	-26.668	FALSE	FALSE	46647	NM_146068	-	0	0	1	0	0	31.1667	1
chr16.21783361.21783480	chr16	21783361	21783480	1e-20	1e-20	3.86111e-20	1	1	-21.4765	-10.1213	1.531e-13	0.00113273	Ehhadh	-17.5309	-10.7048	FALSE	FALSE	4428	NM_023737	-	0	0	1	0	0	67.6667	4
chr16.55892281.55892400	chr16	55892281	55892400	9.52256e-07	2.35797e-06	6.91039e-06	1	1	-17.5306	-14.8726	0.000110629	0.000256721	Fam55c	-12.3929	-13.6318	FALSE	FALSE	2993	NM_001134457	-	0	0	1	0	0	26.8333	1
chr16.92061001.92061120	chr16	92061001	92061120	1e-20	1e-20	3.86111e-20	1	1	-16.7089	-14.3493	4.67757e-06	1.27729e-05	c(Slc5a3, Mrps6)	-15.6917	-16.7771	FALSE	FALSE	2422	NM_080456	+	0	0	1	0	1	38.1667	2
chr17.6950041.6950160	chr17	6950041	6950160	1e-20	1e-20	3.86111e-20	1	1	-13.3095	-15.4478	1.98874e-06	4.69528e-07	Ezr	-12.1813	-17.5167	FALSE	FALSE	36970	NM_009510	-	0	0	1	0	0	60.1667	3
chr17.10707721.10707840	chr17	10707721	10707840	4.30782e-06	1.06789e-05	2.8068e-05	1	1	-13.2427	-14.1059	0.000778367	0.000303356	Pacrg	-24.1941	-17.3653	FALSE	FALSE	190256	NR_045461	+	0	0	1	0	0	34.5	1
chr17.26013121.26013240	chr17	26013121	26013240	0.00482225	0.0108992	0.0170217	1	1	-11.5385	-10.0973	0.0187875	0.0303799	0610011F06Rik	-12.5763	-15.4204	TRUE	FALSE	678	NM_026686	+	1	1	1	0	1	8.16667	2
chr17.28314961.28315080	chr17	28314961	28315080	1e-20	1e-20	3.86111e-20	1	1	-21.5463	-18.194	1.28568e-07	7.10351e-05	Zfp523	-22.1085	-21.5314	TRUE	FALSE	600	NM_172617	+	1	0	1	0	1	20	3
chr17.34727521.34727640	chr17	34727521	34727640	1e-20	1e-20	3.86111e-20	1	1	-12.1264	-16.0696	4.56185e-10	9.63674e-14	Gpsm3	-10.2682	-17.2524	TRUE	FALSE	772	NM_134116	+	1	0	1	0	1	142.333	2
chr18.6767401.6767520	chr18	6767401	6767520	5.89492e-07	1.45106e-06	4.3866e-06	1	1	-13.2027	-13.7207	0.000100241	0.000176183	Rab18	-14.0716	-15.6556	FALSE	FALSE	2200	NM_181070	+	0	0	1	0	1	47.8333	1
chr18.55130281.55130400	chr18	55130281	55130400	1e-20	1e-20	3.86111e-20	1	1	-15.1572	-10.2539	8.8077e-09	0.000305688	Zfp608	-14.6771	-12.5036	FALSE	FALSE	19435	NM_175751	-	0	0	1	0	0	78.5	1
chr18.67508641.67508760	chr18	67508641	67508760	1e-20	1e-20	3.86111e-20	1	1	-24.7962	-10.8809	6.66134e-16	0.000527127	Cidea	-21.5712	-14.4142	FALSE	FALSE	-4885	NR_033214	-	0	0	1	0	0	48.6667	1
chr18.67638361.67638480	chr18	67638361	67638480	1e-20	1e-20	3.86111e-20	1	1	-13.3453	-11.8199	2.57872e-07	5.31622e-06	Slmo1	-12.9123	-11.2301	FALSE	FALSE	13860	NM_144867	+	0	0	1	0	0	55.3333	1
chr18.74611801.74611920	chr18	74611801	74611920	0.000970417	0.00228138	0.00406886	1	1	-13.0889	-11.1546	0.00721435	0.0131694	Myo5b	-13.7689	-13.7704	FALSE	FALSE	9530	NM_201600	+	0	0	1	0	0	19	2
chr18.89778721.89778840	chr18	89778721	89778840	1e-20	1e-20	3.86111e-20	1	1	-11.1555	-15.0417	7.68854e-07	2.45692e-13	Dok6	-10.4549	-12.7239	FALSE	FALSE	159689	NM_001039173	-	0	0	1	0	0	62.3333	3
chr19.3319801.3319920	chr19	3319801	3319920	1e-20	1e-20	3.86111e-20	1	1	-20.6746	-14.7034	5.64979e-07	6.97471e-05	Gm7810	-19.72	-16.2233	FALSE	FALSE	-3381	NM_013495	+	0	0	0	0	0	32	1
chr19.10064161.10064280	chr19	10064161	10064280	3.18552e-05	7.91506e-05	0.000182265	1	1	-13.7852	-11.2283	0.000579056	0.00362259	Best1	-15.1269	-13.6002	FALSE	FALSE	7027	NM_010239	+	0	1	1	0	0	19.3333	1
chr19.16614001.16614120	chr19	16614001	16614120	1.72313e-06	4.23981e-06	1.1861e-05	1	1	-11.9184	-11.5164	0.000398931	0.00020824	Gna14	-12.1535	-11.6586	FALSE	FALSE	103846	NM_008137	+	0	0	1	0	0	45.5	2
chr19.16853521.16853640	chr19	16853521	16853640	8.68367e-06	2.18792e-05	5.48682e-05	1	1	-16.282	-15.4841	0.000738379	0.000756058	Vps13a	-18.9069	-16.3411	FALSE	FALSE	1784	NM_173028	-	0	0	1	0	1	17.8333	1
chr19.41627521.41627640	chr19	41627521	41627640	3.9904e-05	9.87172e-05	0.000223816	1	1	-14.0404	-11.021	0.000447871	0.00606336	Lcor	-10.1475	-15.5721	FALSE	FALSE	3394	NM_172154	+	0	0	1	0	0	13.8333	1
chr19.42200521.42200640	chr19	42200521	42200640	1e-20	1e-20	3.86111e-20	1	1	-10.4026	-13.9164	0.000212539	3.55402e-07	Avpi1	-13.9869	-12.5705	FALSE	FALSE	2844	NM_027106	-	0	0	1	0	0	69.8333	2
chr19.46207081.46207200	chr19	46207081	46207200	1e-20	1e-20	3.86111e-20	1	1	-22.4965	-14.3396	7.57627e-09	0.000116005	Elovl3	-12.5327	-22.9996	TRUE	FALSE	694	NM_007703	+	1	0	1	0	0	30.6667	3
chr19.46606201.46606320	chr19	46606201	46606320	1e-20	1e-20	3.86111e-20	1	1	-24.4362	-19.6712	1.91037e-08	9.43701e-05	Arl3	-24.2176	-17.4687	FALSE	FALSE	30065	NM_053100	+	0	0	1	0	0	10.6667	1
chr19.53874361.53874480	chr19	53874361	53874480	3.21953e-06	8.0715e-06	2.16637e-05	1	1	-14.168	-11.5504	0.000106381	0.00155807	Rbm20	-11.5904	-16.1861	FALSE	FALSE	-92241	NM_011050	+	0	0	1	0	0	44.1667	1
chr2.4484521.4484640	chr2	4484521	4484640	1.28781e-05	3.2422e-05	7.92419e-05	1	1	-19.3886	-10.5626	2.10946e-05	0.0393221	Frmd4a	-12.0716	-13.4797	FALSE	FALSE	3723	NM_001177844	+	0	0	1	0	0	21.5	1
chr2.6246001.6246120	chr2	6246001	6246120	6.80183e-08	1.81382e-07	6.11509e-07	1	1	-13.7573	-11.699	1.30393e-05	0.000211719	Usp6nl	-20.2259	-11.0668	FALSE	FALSE	2200	NM_001080548	+	0	0	1	0	1	49.1667	1
chr2.18595441.18595560	chr2	18595441	18595560	1e-20	1e-20	3.86111e-20	1	1	-15.7443	-18.1929	4.84442e-07	4.85886e-08	Commd3	-11.0674	-15.8424	FALSE	FALSE	1354	NM_147778	+	0	1	1	0	1	31	1
chr2.29478601.29478720	chr2	29478601	29478720	1.26967e-06	3.12884e-06	8.97561e-06	1	1	-11.3579	-13.4021	0.00053859	8.67858e-05	Rapgef1	-13.0167	-12.2004	FALSE	FALSE	3363	NM_001039086	+	0	0	1	0	0	47.8333	3
chr2.60054601.60054720	chr2	60054601	60054720	2.26728e-08	4.53455e-08	1.57102e-07	1	1	-11.1312	-18.5173	0.00107043	1.55053e-06	2015-03-07	-11.1573	-18.2491	FALSE	FALSE	6610	NM_020575	+	0	0	1	0	0	43.3333	1
chr2.69384961.69385080	chr2	69384961	69385080	4.59577e-05	0.000113568	0.00025484	1	1	-11.6408	-10.7613	0.00213142	0.00149796	Lrp2	-17.6894	-12.4296	FALSE	FALSE	39045	NM_001081088	-	0	0	1	0	0	40.6667	5
chr2.75839641.75839760	chr2	75839641	75839760	2.26728e-08	4.53455e-08	1.57102e-07	1	1	-10.899	-13.562	0.000189771	1.79525e-06	Pde11a	-11.5884	-12.5497	FALSE	FALSE	-19618	NM_030188	-	0	0	1	0	0	29.6667	3
chr2.77294521.77294640	chr2	77294521	77294640	9.0691e-08	2.494e-07	8.31884e-07	1	1	-13.6199	-13.7645	2.59079e-06	0.00119058	Zfp385b	-10.9416	-13.631	FALSE	FALSE	-6061	NR_040368	+	0	0	1	0	0	28.8333	2
chr2.126382081.126382200	chr2	126382081	126382200	0.000197774	0.000476808	0.000960879	1	1	-13.1034	-12.5758	0.00383243	0.00428955	Slc27a2	-12.24	-10.9437	FALSE	FALSE	3323	NM_011978	+	0	0	1	0	0	23.3333	1
chr2.145096561.145096680	chr2	145096561	145096680	9.74928e-07	2.38064e-06	6.9698e-06	1	1	-11.2675	-13.889	0.0013151	2.23471e-05	Slc24a3	-10.6921	-14.2469	FALSE	FALSE	28216	NM_053195	+	0	0	1	0	0	41	1
chr2.146091241.146091360	chr2	146091241	146091360	1e-20	1e-20	3.86111e-20	1	1	-12.4214	-23.9053	8.50285e-05	2.32481e-13	Ralgapa2	-13.0898	-28.5485	FALSE	FALSE	6221	NR_040619	+	0	0	1	0	0	42.5	2
chr2.146136121.146136240	chr2	146136121	146136240	3.96773e-06	9.90799e-06	2.6184e-05	1	1	-14.7817	-19.3603	0.00374051	5.70623e-05	Ralgapa2	-16.0809	-24.95	FALSE	FALSE	51101	NR_040619	+	0	0	1	0	0	21.3333	2
chr2.153477001.153477120	chr2	153477001	153477120	1e-20	1e-20	3.86111e-20	1	1	-20.7768	-11.2741	1.09095e-09	0.00112924	Dnmt3b	-16.5306	-17.6193	FALSE	FALSE	1818	NM_001003960	+	0	0	1	0	1	40	4
chr2.165847681.165847800	chr2	165847681	165847800	4.53455e-08	1.13364e-07	3.87042e-07	1	1	-13.6098	-18.152	0.000195743	1.25269e-05	Ncoa3	-13.1926	-11.4067	FALSE	FALSE	29546	NM_008679	+	0	0	1	0	0	13.8333	1
chr2.167056441.167056560	chr2	167056441	167056560	0.00745711	0.0166185	0.0250017	1	1	-11.4976	-12.2593	0.0460428	0.0202815	Ptgis	-13.2424	-10.7273	FALSE	FALSE	9478	NM_008968	-	0	0	1	0	0	14	2
chr2.168408481.168408600	chr2	168408481	168408600	1e-20	1e-20	3.86111e-20	1	1	-26.8293	-25.7532	7.7911e-06	1.0299e-06	Nfatc2	-22.2633	-32.9064	FALSE	FALSE	7092	NM_001136073	-	0	0	1	0	0	12.5	1
chr2.172850041.172850160	chr2	172850041	172850160	1e-20	1e-20	3.86111e-20	1	1	-11.4049	-10.4386	2.21594e-06	9.21639e-06	Rbm38	-13.5222	-12.0649	FALSE	FALSE	2640	NM_019547	+	0	0	1	0	0	98.3333	4
chr2.172949761.172949880	chr2	172949761	172949880	8.38892e-07	2.08589e-06	6.17036e-06	1	1	-12.9388	-13.3223	0.000366478	6.35698e-05	Gm6103	-16.9207	-13.4973	FALSE	FALSE	-370	NR_040321	+	1	0	0	0	0	41.1667	2
chr3.83958481.83958600	chr3	83958481	83958600	2.26728e-08	4.53455e-08	1.57102e-07	1	1	-12.7351	-13.4136	4.67151e-05	4.44094e-05	Mnd1	-14.2852	-12.8174	FALSE	FALSE	1109	NM_029797	-	0	0	1	0	1	48.3333	1
chr3.88982881.88983000	chr3	88982881	88983000	1.83649e-06	4.51188e-06	1.25677e-05	1	1	-12.0399	-12.8118	0.000402938	0.000215007	Scamp3	-14.6529	-13.8801	FALSE	FALSE	1476	NM_011886	+	0	0	1	0	1	50.3333	1
chr3.95734681.95734800	chr3	95734681	95734800	2.26728e-08	4.53455e-08	1.57102e-07	1	1	-17.4771	-14.9317	1.21396e-05	0.000133346	Anp32e	-20.0265	-15.2229	FALSE	FALSE	1503	NM_001253757	+	0	0	1	0	1	25.8333	2
chr3.98233201.98233320	chr3	98233201	98233320	1.13364e-06	2.81142e-06	8.12784e-06	1	1	-11.3646	-13.9568	0.00131722	2.9769e-05	Zfp697	-12.5442	-15.6475	FALSE	FALSE	46799	NM_172863	+	0	1	0	0	1	24	1
chr3.108520801.108520920	chr3	108520801	108520920	9.74928e-07	2.38064e-06	6.9698e-06	1	1	-10.0347	-18.7992	0.0053944	5.49697e-06	Gpsm2	-11.4714	-18.4142	FALSE	FALSE	4298	NM_029522	-	0	0	1	0	0	33.3333	2
chr3.138192481.138192600	chr3	138192481	138192600	1e-20	1e-20	3.86111e-20	1	1	-23.8189	-13.4803	7.50182e-09	0.000432774	Eif4e	-22.7363	-13.2376	FALSE	FALSE	3098	NR_035481	+	0	0	1	0	1	27.1667	2
chr3.138195961.138196080	chr3	138195961	138196080	3.5823e-06	8.93307e-06	2.37477e-05	1	1	-12.9145	-10.4885	0.000220458	0.000876471	Eif4e	-14.6032	-10.9083	FALSE	FALSE	6578	NR_035481	+	0	0	1	0	0	32.6667	1
chr4.54982561.54982680	chr4	54982561	54982680	1e-20	1e-20	3.86111e-20	1	1	-15.6307	-11.3823	4.60874e-09	7.64884e-06	Zfp462	-15.0674	-12.4391	FALSE	FALSE	21746	NM_172867	+	0	0	1	0	0	77.5	2
chr4.55053361.55053480	chr4	55053361	55053480	6.12164e-07	1.4964e-06	4.51492e-06	1	1	-11.1819	-15.4205	0.00258462	7.25379e-06	Zfp462	-12.0162	-12.8578	FALSE	FALSE	92546	NM_172867	+	0	0	1	0	0	24.6667	2
chr4.107226721.107226840	chr4	107226721	107226840	0.00069365	0.00164099	0.0030054	1	1	-10.5342	-13.121	0.0222309	0.00293849	Glis1	-13.1396	-14.0728	FALSE	FALSE	119399	NM_147221	+	0	0	1	0	0	16.8333	3
chr4.128686081.128686200	chr4	128686081	128686200	1e-20	1e-20	3.86111e-20	1	1	-12.6802	-13.4414	1.96788e-07	1.5732e-05	Ak2	-13.3954	-14.2773	FALSE	FALSE	15615	NM_001033966	+	0	0	1	0	0	13.3333	1
chr4.135773281.135773400	chr4	135773281	135773400	8.16219e-07	1.97253e-06	5.8608e-06	1	1	-15.2537	-11.2337	5.81056e-06	0.00398376	Asap3	-11.868	-10.7892	FALSE	FALSE	11003	NM_001008232	+	0	0	1	0	0	18.5	1
chr4.147861841.147861960	chr4	147861841	147861960	0.000188524	0.000455382	0.000921229	1	1	-12.7218	-12.0807	0.00489664	0.00318141	Mtor	-12.312	-10.6572	FALSE	FALSE	12612	NM_001039554	-	0	0	1	0	0	26.3333	1
chr5.23110441.23110560	chr5	23110441	23110560	7.02855e-07	1.7458e-06	5.22087e-06	1	1	-12.1813	-12.1148	2.73114e-05	0.00075559	Srpk2	-15.428	-11.9528	FALSE	FALSE	11830	NM_009274	-	0	0	1	0	0	61.6667	2
chr5.38213401.38213520	chr5	38213401	38213520	0.00313045	0.00715849	0.0115952	1	1	-10.1238	-11.8716	0.0264621	0.0132387	c(Msx1, Msx1as)	-13.633	-20.1265	FALSE	FALSE	1600	NR_027920	+	0	1	1	0	1	25.8333	4
chr5.66463081.66463200	chr5	66463081	66463200	1e-20	1e-20	3.86111e-20	1	1	-12.1055	-14.3089	4.02487e-05	1.11539e-06	Rbm47	-12.0584	-15.7077	FALSE	FALSE	26218	NM_139065	-	0	0	1	0	0	49.1667	3
chr5.123440881.123441000	chr5	123440881	123441000	3.85437e-07	9.52256e-07	2.9576e-06	1	1	-18.2288	-11.0619	2.32572e-06	0.00449735	A930024E05Rik	-11.8896	-11.1325	FALSE	FALSE	1520	NR_045820	+	0	0	1	0	1	23.5	1
chr5.128437201.128437320	chr5	128437201	128437320	1.26967e-05	3.19459e-05	7.81566e-05	1	1	-10.2712	-20.0661	0.0423284	1.93509e-05	Tmem132d	-15.2059	-19.1193	FALSE	FALSE	324571	NM_177005	+	0	0	1	0	0	22.3333	2
chr5.136515841.136515960	chr5	136515841	136515960	2.26728e-08	4.53455e-08	1.57102e-07	1	1	-13.2207	-16.7637	0.000182289	2.84237e-06	Upk3b	-12.2984	-19.301	FALSE	FALSE	1477	NM_175309	+	0	1	1	0	0	19.8333	2
chr5.137950801.137950920	chr5	137950801	137950920	2.44412e-05	6.09897e-05	0.000142998	1	1	-12.7521	-10.8526	0.000793116	0.0020049	Gm8066	-10.2721	-10.9975	FALSE	FALSE	-7145	NM_028753	-	0	0	0	0	1	35.5	1
chr6.4568161.4568280	chr6	4568161	4568280	2.26728e-08	4.53455e-08	1.57102e-07	1	1	-16.9185	-11.8143	7.14537e-07	0.000444071	Casd1	-14.4438	-14.183	FALSE	FALSE	17097	NM_145398	+	0	0	1	0	0	47.3333	2
chr6.66903841.66903960	chr6	66903841	66903960	9.0691e-08	2.494e-07	8.31884e-07	1	1	-15.4872	-17.6866	7.8902e-05	3.66325e-05	Gng12	-14.4916	-12.3404	FALSE	FALSE	56958	NM_001177558	+	0	0	1	0	0	16.6667	1
chr6.67108561.67108680	chr6	67108561	67108680	2.35797e-06	5.89492e-06	1.6112e-05	1	1	-12.7055	-15.6406	0.00146515	8.04446e-05	A430010J10Rik	-18.2059	-13.2099	FALSE	FALSE	-108293	NM_001113565	+	0	0	0	0	0	31.6667	3
chr6.72685081.72685200	chr6	72685081	72685200	2.26728e-08	4.53455e-08	1.57102e-07	1	1	-14.9451	-17.2288	1.19292e-05	3.24416e-05	Tcf7l1	-16.9929	-11.7688	FALSE	FALSE	53751	NM_009332	-	0	0	1	0	0	28.6667	2
chr6.94134001.94134120	chr6	94134001	94134120	1e-20	1e-20	3.86111e-20	1	1	-23.2219	-20.0145	5.56628e-07	5.02048e-05	Magi1	-22.8612	-23.9455	FALSE	FALSE	99779	NM_010367	-	0	0	1	0	0	4.83333	2
chr6.114349081.114349200	chr6	114349081	114349200	9.0691e-08	2.494e-07	8.31884e-07	1	1	-12.4428	-21.5383	0.00377264	7.52123e-07	Hrh1	-17.4813	-18.9035	FALSE	FALSE	1153	NM_008285	+	0	0	1	0	1	20.3333	2
chr6.119268361.119268480	chr6	119268361	119268480	1e-20	1e-20	3.86111e-20	1	1	-37.8337	-17.1173	3.33067e-15	8.41303e-07	c(Cacna2d4, Lrtm2)	-36.1855	-18.6018	FALSE	FALSE	10743	NM_001172207	-	0	0	1	0	0	27.1667	1
chr6.120905281.120905400	chr6	120905281	120905400	1e-20	1e-20	3.86111e-20	1	1	-18.3121	-26.1612	1.56309e-08	2.66454e-15	LOC100504032	-15.8315	-22.9321	FALSE	FALSE	-38444	NM_007544	-	0	0	1	0	0	27	2
chr6.146179081.146179200	chr6	146179081	146179200	0.00177625	0.0041203	0.00699536	1	1	-11.2293	-12.879	0.0162449	0.0114346	Itpr2	-11.0284	-13.9424	FALSE	FALSE	271546	NM_019923	-	0	0	1	0	0	22.5	1
chr7.56250481.56250600	chr7	56250481	56250600	2.26728e-08	4.53455e-08	1.57102e-07	1	1	-22.8222	-19.0688	1.43178e-06	0.000641249	Nav2	-22.0517	-12.4396	FALSE	FALSE	36040	NM_001111016	+	0	0	1	0	0	18.6667	3
chr7.72026521.72026640	chr7	72026521	72026640	4.76128e-07	1.13364e-06	3.4866e-06	1	1	-11.1909	-23.8153	0.00750892	1.78459e-06	Fam189a1	-20.5788	-25.9259	FALSE	FALSE	-8596	NM_023239	-	0	0	1	0	0	17.8333	1
chr7.109417441.109417560	chr7	109417441	109417560	2.26728e-08	4.53455e-08	1.57102e-07	1	1	-14.9487	-16.3252	3.71081e-05	3.83232e-05	Stim1	-12.8106	-12.2943	TRUE	FALSE	1105	NM_009287	+	0	0	1	0	1	13.3333	3
chr7.126119761.126119880	chr7	126119761	126119880	1.97933e-05	4.93359e-05	0.000117238	1	1	-20.7917	-11.435	5.78079e-05	0.0221725	Gprc5b	-16.3868	-10.1617	FALSE	FALSE	18846	NM_001195774	-	0	0	1	0	0	17.5	1
chr8.15122041.15122160	chr8	15122041	15122160	2.26728e-08	4.53455e-08	1.57102e-07	1	1	-13.0117	-13.6056	3.5469e-05	2.34104e-05	Myom2	-11.007	-11.5747	FALSE	FALSE	64390	NM_008664	+	0	0	1	0	0	31.3333	1
chr8.79816681.79816800	chr8	79816681	79816800	1e-20	1e-20	3.86111e-20	1	1	-20.6855	-11.2157	2.32884e-10	0.000205631	Arhgap10	-14.7291	-11.041	FALSE	FALSE	-224155	NR_028125	+	0	0	1	0	0	39.8333	3
chr8.87283201.87283320	chr8	87283201	87283320	5.44146e-07	1.33769e-06	4.06933e-06	1	1	-10.6294	-18.7134	0.00491299	3.14967e-06	Nfix	-10.6984	-20.7437	FALSE	FALSE	14949	NM_001081981	-	0	0	1	0	0	27.1667	1
chr9.3571921.3572040	chr9	3571921	3572040	2.26728e-08	4.53455e-08	1.57102e-07	1	1	-12.2825	-27.1532	0.0160873	1.20488e-07	Gucy1a2	-15.2362	-24.8412	FALSE	FALSE	39574	NM_001033322	+	0	0	1	0	0	20.6667	1
chr9.80024881.80025000	chr9	80024881	80025000	1.55535e-05	3.89291e-05	9.40925e-05	1	1	-13.5235	-13.9794	0.00165163	0.000603684	Myo6	-14.216	-17.8048	FALSE	FALSE	12042	NM_001039546	+	0	0	1	0	0	31.3333	4
chr9.96159481.96159600	chr9	96159481	96159600	1.65511e-06	4.05842e-06	1.13809e-05	1	1	-13.6285	-17.6334	0.000689714	0.000101905	Tfdp2	-13.2861	-13.2708	TRUE	FALSE	-67	NM_001184710	+	1	0	1	0	0	15.6667	1
chr9.121361881.121362000	chr9	121361881	121362000	4.51188e-06	1.1155e-05	2.92453e-05	1	1	-11.3806	-11.7786	0.000197383	0.00126376	Trak1	-10.9146	-14.1274	FALSE	FALSE	42808	NM_031161	-	0	0	1	0	1	57.6667	2
chr9.121402681.121402800	chr9	121402681	121402800	2.33529e-06	5.8269e-06	1.59406e-05	1	1	-15.5016	-11.4055	2.27286e-05	0.00515906	Cck	-18.0607	-15.5267	FALSE	FALSE	2008	NM_031161	-	0	0	1	0	1	34.1667	4
chrX.50097601.50097720	chrX	50097601	50097720	1e-20	1e-20	3.86111e-20	1	1	-17.5963	-11.5338	5.21805e-15	8.35039e-06	Kis2	-21.3736	-13.4898	TRUE	TRUE	51	NR_003188	-	1	1	0	1	0	46.1667	11
chrX.156195841.156195960	chrX	156195841	156195960	2.26728e-08	4.53455e-08	1.57102e-07	1	1	-13.5619	-13.2604	4.02218e-05	4.10476e-05	Sh3kbp1	-18.1416	-13.1428	FALSE	FALSE	49310	NM_021389	+	0	0	1	0	0	54.5	1

## Sheet: Diff.Methylation Late
id	chr	start	end	strand	pvalue	qvalue	meth.diff	Gene.annotate	prom	exon	intron	target.row	dist.to.feature	feature.name	feature.strand	Upstream.promoter.indicator	CpGi	shores	coverage	No.CpG.window
chr10.100164721.100164840	chr10	100164721	100164840	*	0	0	-36.4066	NA	0	0	0	1	109703	NM_001081246	+	FALSE	0	0	78.4286	3
chr10.10373761.10373880	chr10	10373761	10373880	*	0	0	29.982	NA	0	0	0	2	48020	NR_033630	+	FALSE	0	0	81.8571	4
chr10.107377441.107377560	chr10	107377441	107377560	*	2.99342e-11	1.20364e-10	29.5915	NA	0	0	0	3	-28252	NM_001177567	-	FALSE	0	0	38	1
chr10.107377561.107377680	chr10	107377561	107377680	*	0	0	31.4431	NA	0	0	0	4	-28372	NM_001177567	-	FALSE	0	0	228.143	3
chr10.107616601.107616720	chr10	107616601	107616720	*	0	0	34.2959	Ppp1r12a	0	0	1	5	17147	NM_027892	+	FALSE	0	0	100.286	2
chr10.107831881.107832000	chr10	107831881	107832000	*	0	0	26.8311	Pawr	0	0	1	6	62638	NM_054056	+	FALSE	0	0	254.857	5
chr10.110315881.110316000	chr10	110315881	110316000	*	0	0	26.4019	NA	0	0	1	7	17564	NR_045979	-	FALSE	0	0	144	1
chr10.110337001.110337120	chr10	110337001	110337120	*	2.12053e-13	1.08957e-12	28.4957	NA	0	0	0	8	-3439	NR_045979	-	FALSE	0	0	52.2857	2
chr10.110337361.110337480	chr10	110337361	110337480	*	0	0	39.735	NA	0	0	0	9	-3799	NR_045979	-	FALSE	0	0	81.7143	3
chr10.110366881.110367000	chr10	110366881	110367000	*	0	0	37.3728	Csrp2	0	0	1	10	9651	NM_007792	+	FALSE	0	0	76.8571	2
chr10.110390041.110390160	chr10	110390041	110390160	*	0	0	32.4129	Zdhhc17	0	0	1	11	32811	NM_007792	+	FALSE	0	0	130.286	4
chr10.110390281.110390400	chr10	110390281	110390400	*	0	0	27.9167	Zdhhc17	0	0	1	12	33051	NM_007792	+	FALSE	0	0	100.714	2
chr10.110429401.110429520	chr10	110429401	110429520	*	0	0	26.3803	Zdhhc17	0	0	1	13	17603	NM_172554	-	FALSE	0	0	87.8571	1
chr10.11064601.11064720	chr10	11064601	11064720	*	0	0	27.1512	Epm2a	0	0	1	14	1360	NM_010146	+	FALSE	0	1	198.857	3
chr10.110827201.110827320	chr10	110827201	110827320	*	0	0	27.4163	NA	0	0	0	15	-82928	NM_015781	+	FALSE	0	0	77.8571	2
chr10.111031921.111032040	chr10	111031921	111032040	*	0	0	28.8307	NA	1	0	0	16	-593	NR_045344	-	FALSE	0	0	77.7143	4
chr10.111109681.111109800	chr10	111109681	111109800	*	0	0	31.1627	NA	0	0	0	17	-78353	NR_045344	-	FALSE	0	0	72.7143	1
chr10.111113401.111113520	chr10	111113401	111113520	*	0	0	29.5497	NA	0	0	0	18	-82073	NR_045344	-	FALSE	0	0	65.7143	1
chr10.111272161.111272280	chr10	111272161	111272280	*	0	0	34.0729	NA	0	0	0	19	39153	NR_046029	-	FALSE	0	0	177.714	3
chr10.111411721.111411840	chr10	111411721	111411840	*	0	0	-28.3904	Krr1	0	0	1	20	1972	NM_178610	+	FALSE	0	1	77.4286	2
chr10.114749041.114749160	chr10	114749041	114749160	*	0	0	-27.6229	Rab21	0	0	1	21	3488	NM_024454	-	FALSE	0	0	101.571	3
chr10.115240921.115241040	chr10	115240921	115241040	*	0	0	-33.5766	NA	0	0	0	22	-13300	NM_146010	+	FALSE	0	0	50.1429	2
chr10.115787881.115788000	chr10	115787881	115788000	*	0	0	28.6419	Ptprb	0	1	1	23	49453	NM_029928	+	FALSE	0	0	213.714	6
chr10.115788001.115788120	chr10	115788001	115788120	*	2.21823e-13	1.13717e-12	26.0747	Ptprb	0	0	1	24	49573	NM_029928	+	FALSE	0	0	54.1429	1
chr10.116208601.116208720	chr10	116208601	116208720	*	0	0	35.319	NA	0	0	0	25	-42369	NR_045345	-	FALSE	0	0	406.286	5
chr10.116208841.116208960	chr10	116208841	116208960	*	0	0	33.1364	NA	0	0	0	26	-42609	NR_045345	-	FALSE	0	0	271.857	4
chr10.116208961.116209080	chr10	116208961	116209080	*	0	0	33.3998	NA	0	0	0	27	-42729	NR_045345	-	FALSE	0	0	60.2857	1
chr10.116767921.116768040	chr10	116767921	116768040	*	0	0	-26.4647	NA	0	0	0	28	-37998	NM_013590	-	FALSE	0	0	147.714	2
chr10.117119761.117119880	chr10	117119761	117119880	*	0	0	28.527	Cpm	0	0	1	29	27893	NM_010786	-	FALSE	0	0	93.4286	2
chr10.117168721.117168840	chr10	117168721	117168840	*	4.44089e-16	2.9725e-15	-30.4099	NA	0	0	0	30	14575	NM_029875	-	FALSE	0	0	61.1429	4
chr10.117293401.117293520	chr10	117293401	117293520	*	9.21485e-15	5.4446e-14	-30.9766	NA	0	0	0	31	-10372	NM_024457	-	FALSE	0	0	54.4286	1
chr10.117353521.117353640	chr10	117353521	117353640	*	0	0	32.138	NA	0	0	0	32	-8875	NR_045342	+	FALSE	0	0	204.571	4
chr10.11738281.11738400	chr10	11738281	11738400	*	0	0	27.3832	NA	0	0	0	33	675040	NM_010146	+	FALSE	0	0	173.143	3
chr10.117566641.117566760	chr10	117566641	117566760	*	1.01067e-10	3.81222e-10	27.6188	NA	0	0	0	34	-12083	NM_001162904	+	FALSE	0	0	38.8571	2
chr10.118085401.118085520	chr10	118085401	118085520	*	0	0	43.8971	NA	0	0	0	35	207300	NM_008337	+	FALSE	0	0	43.4286	1
chr10.118159321.118159440	chr10	118159321	118159440	*	0	0	28.8644	NA	0	0	0	36	146520	NM_001014390	-	FALSE	0	0	149.571	2
chr10.118389961.118390080	chr10	118389961	118390080	*	0	0	-35.9719	NA	0	0	0	37	-84003	NM_001014390	-	FALSE	0	0	52.5714	6
chr10.118492321.118492440	chr10	118492321	118492440	*	0	0	27.2359	NA	0	0	0	38	-37521	NR_045348	+	FALSE	0	0	101	3
chr10.118492441.118492560	chr10	118492441	118492560	*	0	0	31.9763	NA	0	0	0	39	-37401	NR_045348	+	FALSE	0	0	52.7143	1
chr10.118492561.118492680	chr10	118492561	118492680	*	0	0	26.1433	NA	0	0	0	40	-37281	NR_045348	+	FALSE	0	0	450.857	5
chr10.118492681.118492800	chr10	118492681	118492800	*	0	0	25.1092	NA	0	0	0	41	-37161	NR_045348	+	FALSE	0	0	103.286	1
chr10.118658761.118658880	chr10	118658761	118658880	*	0	0	32.0113	Cand1	0	0	1	42	18232	NM_027994	-	FALSE	0	0	101	3
chr10.119562601.119562720	chr10	119562601	119562720	*	2.01797e-08	5.64582e-08	-25.0522	NA	0	0	0	43	-12581	NM_080446	-	FALSE	0	0	44.7143	2
chr10.119626561.119626680	chr10	119626561	119626680	*	0	0	-29.4767	Irak3	0	0	1	44	11914	NM_028679	-	FALSE	0	0	412.857	5
chr10.119626681.119626800	chr10	119626681	119626800	*	0	0	-38.3971	Irak3	0	0	1	45	11794	NM_028679	-	FALSE	0	0	101.143	1
chr10.119745841.119745960	chr10	119745841	119745960	*	0	0	29.6748	NA	0	0	0	46	-80619	NR_040626	+	FALSE	0	0	75.8571	1
chr10.119866201.119866320	chr10	119866201	119866320	*	0	0	25.8241	Hmga2	0	0	1	47	18847	NR_030434	-	FALSE	0	0	120.143	3
chr10.120001081.120001200	chr10	120001081	120001200	*	0	0	27.0157	NA	0	0	0	48	-87091	NM_010441	-	FALSE	0	0	345.857	4
chr10.120001201.120001320	chr10	120001201	120001320	*	0	0	26.6596	NA	0	0	0	49	-87211	NM_010441	-	FALSE	0	0	187.429	2
chr10.120104041.120104160	chr10	120104041	120104160	*	0	0	31.3607	NA	0	0	0	50	-98628	NR_038003	+	FALSE	0	0	108	2
chr10.120104161.120104280	chr10	120104161	120104280	*	0	0	26.1418	NA	0	0	0	51	-98508	NR_038003	+	FALSE	0	0	198.857	4
chr10.120111361.120111480	chr10	120111361	120111480	*	1.56541e-14	9.04175e-14	29.2558	NA	0	0	0	52	-91308	NR_038003	+	FALSE	0	0	57	1
chr10.120117121.120117240	chr10	120117121	120117240	*	0	0	-27.2913	NA	0	0	0	53	-85548	NR_038003	+	FALSE	0	0	417.286	3
chr10.120263521.120263640	chr10	120263521	120263640	*	0	0	-32.093	Msrb3	0	0	1	54	-31045	NR_038023	+	FALSE	0	0	233.714	3
chr10.120263641.120263760	chr10	120263641	120263760	*	0	0	-34.6715	Msrb3	0	0	1	55	-30925	NR_038023	+	FALSE	0	0	191	3
chr10.120263881.120264000	chr10	120263881	120264000	*	0	0	-30.8203	Msrb3	0	0	1	56	-30685	NR_038023	+	FALSE	0	0	159.857	2
chr10.120264001.120264120	chr10	120264001	120264120	*	0	0	-30.7883	Msrb3	0	0	1	57	-30565	NR_038023	+	FALSE	0	0	476.286	4
chr10.120454081.120454200	chr10	120454081	120454200	*	0	0	25.2972	NA	0	0	0	58	-16860	NM_011915	+	FALSE	0	0	234.857	4
chr10.120566161.120566280	chr10	120566161	120566280	*	0	0	26.1723	NA	0	0	0	59	95103	NM_011915	+	FALSE	0	0	114.714	5
chr10.120873241.120873360	chr10	120873241	120873360	*	1.44995e-13	7.58677e-13	26.9986	Rassf3	0	0	1	60	39947	NM_138956	-	FALSE	0	0	65.8571	1
chr10.120892321.120892440	chr10	120892321	120892440	*	1.16518e-12	5.50901e-12	26.37	Rassf3	0	0	1	61	20867	NM_138956	-	FALSE	0	0	60.2857	1
chr10.120896401.120896520	chr10	120896401	120896520	*	0	0	27.7951	Rassf3	0	0	1	62	16787	NM_138956	-	FALSE	0	0	184	2
chr10.120899041.120899160	chr10	120899041	120899160	*	0	0	27.4778	Rassf3	0	0	1	63	14147	NM_138956	-	FALSE	0	0	227.286	4
chr10.120899161.120899280	chr10	120899161	120899280	*	0	0	30.6703	Rassf3	0	0	1	64	14027	NM_138956	-	FALSE	0	0	145	3
chr10.120937201.120937320	chr10	120937201	120937320	*	0	0	33.9597	NA	0	0	0	65	-23896	NM_138956	-	FALSE	0	0	95.2857	2
chr10.120946921.120947040	chr10	120946921	120947040	*	0	0	27.5351	NA	0	0	0	66	-33616	NM_138956	-	FALSE	0	0	155.571	4
chr10.121168321.121168440	chr10	121168321	121168440	*	1.66533e-15	1.06e-14	-27.8505	NA	0	0	0	67	-8553	NM_173022	+	FALSE	0	0	64.5714	1
chr10.12189601.12189720	chr10	12189601	12189720	*	0	0	26.6197	Utrn	0	0	1	68	391814	NM_011682	-	FALSE	0	0	243.286	2
chr10.122190361.122190480	chr10	122190361	122190480	*	0	0	26.848	Ppm1h	0	0	1	69	74545	NM_001110218	+	FALSE	0	0	183.571	1
chr10.122239201.122239320	chr10	122239201	122239320	*	0	0	32.1028	Ppm1h	0	1	1	70	123385	NM_001110218	+	FALSE	0	1	91.1429	5
chr10.122239321.122239440	chr10	122239321	122239440	*	0	0	25.1914	Ppm1h	0	1	0	71	123505	NM_001110218	+	FALSE	1	1	143.571	9
chr10.122320921.122321040	chr10	122320921	122321040	*	0	0	25.3412	Ppm1h	0	0	1	72	101741	NR_029527	-	FALSE	0	0	212	3
chr10.122321161.122321280	chr10	122321161	122321280	*	0	0	31.8489	Ppm1h	0	0	1	73	101501	NR_029527	-	FALSE	0	0	56.1429	2
chr10.122321521.122321640	chr10	122321521	122321640	*	0	0	33.8778	Ppm1h	0	0	1	74	101141	NR_029527	-	FALSE	0	0	122.857	4
chr10.122323801.122323920	chr10	122323801	122323920	*	0	0	28.2047	Ppm1h	0	0	1	75	98861	NR_029527	-	FALSE	0	0	72.8571	1
chr10.122323921.122324040	chr10	122323921	122324040	*	0	0	29.5924	Ppm1h	0	0	1	76	98741	NR_029527	-	FALSE	0	0	79.7143	2
chr10.122324161.122324280	chr10	122324161	122324280	*	0	0	30.2575	Ppm1h	0	0	1	77	98501	NR_029527	-	FALSE	0	0	579.857	7
chr10.122324401.122324520	chr10	122324401	122324520	*	1.59772e-12	7.43634e-12	29.0191	Ppm1h	0	0	1	78	98261	NR_029527	-	FALSE	0	0	45.1429	3
chr10.122350201.122350320	chr10	122350201	122350320	*	0	0	35.6776	Ppm1h	0	0	1	79	72461	NR_029527	-	FALSE	0	0	110.714	2
chr10.124931761.124931880	chr10	124931761	124931880	*	0	0	25.8181	NA	0	0	0	80	-166171	NM_011391	-	FALSE	0	0	110.429	1
chr10.125406481.125406600	chr10	125406481	125406600	*	0	0	31.2326	Lrig3	0	0	1	81	3208	NM_177152	+	FALSE	0	0	128.286	3
chr10.125807641.125807760	chr10	125807641	125807760	*	1.66533e-14	9.59493e-14	25.4127	NA	0	0	0	82	404368	NM_177152	+	FALSE	0	0	78.7143	1
chr10.126364441.126364560	chr10	126364441	126364560	*	0	0	37.9417	NA	0	0	0	83	-26015	NM_026858	-	FALSE	0	1	227.286	3
chr10.126367681.126367800	chr10	126367681	126367800	*	4.22329e-13	2.09881e-12	25.4882	NA	0	0	0	84	-29255	NM_026858	-	FALSE	0	1	67.1429	4
chr10.126398881.126399000	chr10	126398881	126399000	*	7.49392e-11	2.87063e-10	25.6589	NA	0	0	0	85	-16773	NM_001113470	+	FALSE	0	0	43.1429	4
chr10.126408961.126409080	chr10	126408961	126409080	*	0	0	28.0422	NA	0	0	0	86	-6693	NM_001113470	+	FALSE	0	0	116.857	5
chr10.126418321.126418440	chr10	126418321	126418440	*	0	0	31.6458	Ctdsp2	0	0	1	87	2550	NM_001113470	+	FALSE	0	1	72.7143	1
chr10.126517201.126517320	chr10	126517201	126517320	*	0	0	29.4663	Agap2	0	1	0	88	1240	NM_001033263	+	FALSE	1	0	186.714	8
chr10.126517921.126518040	chr10	126517921	126518040	*	0	0	39.3462	Agap2	0	0	1	89	1960	NM_001033263	+	FALSE	0	1	71.4286	2
chr10.126518041.126518160	chr10	126518041	126518160	*	0	0	35.3506	Agap2	0	0	1	90	2080	NM_001033263	+	FALSE	0	1	63.7143	2
chr10.126518401.126518520	chr10	126518401	126518520	*	0	0	43.1259	Agap2	0	0	1	91	2440	NM_001033263	+	FALSE	0	1	148.143	9
chr10.126518521.126518640	chr10	126518521	126518640	*	0	0	43.2191	Agap2	0	0	1	92	2560	NM_001033263	+	FALSE	1	1	148.857	9
chr10.126518761.126518880	chr10	126518761	126518880	*	0	0	31.7918	Agap2	0	0	1	93	2800	NM_001033263	+	FALSE	1	1	245.571	7
chr10.126518881.126519000	chr10	126518881	126519000	*	9.10383e-15	5.38243e-14	27.1334	Agap2	0	0	1	94	2920	NM_001033263	+	FALSE	0	1	62.7143	1
chr10.126519361.126519480	chr10	126519361	126519480	*	0	0	27.7687	Agap2	0	1	1	95	3400	NM_001033263	+	FALSE	0	1	101.714	3
chr10.126527761.126527880	chr10	126527761	126527880	*	0	0	38.3989	Agap2	0	1	1	96	11800	NM_001033263	+	FALSE	0	1	145.429	6
chr10.126528001.126528120	chr10	126528001	126528120	*	0	0	33.4015	Agap2	0	1	0	97	12040	NM_001033263	+	FALSE	1	1	133.857	10
chr10.126528121.126528240	chr10	126528121	126528240	*	0	0	34.6552	Agap2	0	1	1	98	12160	NM_001033263	+	FALSE	1	0	121.429	8
chr10.126548281.126548400	chr10	126548281	126548400	*	0	0	-26.2331	Os9	0	0	1	99	9817	NM_177614	-	FALSE	0	0	205.714	4
chr10.126578761.126578880	chr10	126578761	126578880	*	0	0	-30.1166	NA	0	0	0	100	-20546	NM_001171026	-	FALSE	0	0	122.571	6
chr10.126604321.126604440	chr10	126604321	126604440	*	3.59535e-12	1.61011e-11	-34.5571	B4galnt1	0	0	1	101	1436	NM_001244618	+	FALSE	0	1	34.4286	1
chr10.126607201.126607320	chr10	126607201	126607320	*	0	0	40.9046	B4galnt1	0	1	1	102	4316	NM_001244618	+	FALSE	0	1	251	6
chr10.126624721.126624840	chr10	126624721	126624840	*	5.88418e-15	3.54464e-14	26.0609	D10Ertd610e	0	0	1	103	2040	NM_001166413	-	FALSE	0	1	78	3
chr10.126628801.126628920	chr10	126628801	126628920	*	2.22045e-16	1.52189e-15	26.687	Dtx3	0	0	1	104	-1692	NM_028027	-	FALSE	0	1	72.5714	1
chr10.126633481.126633600	chr10	126633481	126633600	*	0	0	35.3615	F420014N23Rik	1	0	1	105	-717	NM_030714	-	TRUE	0	1	213.143	3
chr10.126633601.126633720	chr10	126633601	126633720	*	0	0	32.5024	F420014N23Rik	1	0	1	106	-837	NM_030714	-	TRUE	0	1	90.2857	1
chr10.126633721.126633840	chr10	126633721	126633840	*	3.10862e-15	1.92576e-14	27.0564	F420014N23Rik	1	1	1	107	-957	NM_030714	-	TRUE	0	1	73.2857	1
chr10.126668041.126668160	chr10	126668041	126668160	*	0	0	-25.8196	Kif5a	0	1	1	108	-19364	NM_054097	-	FALSE	0	0	162.857	4
chr10.126705601.126705720	chr10	126705601	126705720	*	0	0	38.7461	Dctn2	0	0	1	109	2285	NM_001190454	+	FALSE	0	1	66.5714	2
chr10.126705721.126705840	chr10	126705721	126705840	*	0	0	30.7065	Dctn2	0	0	1	110	2405	NM_001190454	+	FALSE	0	1	115.143	2
chr10.126720121.126720240	chr10	126720121	126720240	*	0	0	27.787	Mbd6	0	1	1	111	5588	NM_033072	-	TRUE	0	0	83.2857	2
chr10.126730201.126730320	chr10	126730201	126730320	*	0	0	28.8027	Ddit3	0	0	1	112	2354	NM_007837	+	FALSE	0	0	109	1
chr10.126760801.126760920	chr10	126760801	126760920	*	0	0	-42.2242	Arhgap9	1	1	1	113	20	NM_146011	+	TRUE	0	0	87.7143	4
chr10.126762481.126762600	chr10	126762481	126762600	*	0	0	-30.1783	Arhgap9	0	1	1	114	1700	NM_146011	+	TRUE	0	1	157.429	2
chr10.126764281.126764400	chr10	126764281	126764400	*	0	0	25.0167	Arhgap9	0	0	1	115	3500	NM_146011	+	FALSE	1	1	245.143	5
chr10.126953761.126953880	chr10	126953761	126953880	*	0	0	35.4719	Ndufa4l2	0	1	0	116	1768	NM_001098789	+	FALSE	0	0	190.714	8
chr10.127027321.127027440	chr10	127027321	127027440	*	0	0	-27.8575	Lrp1	0	0	1	117	30765	NM_008512	-	FALSE	0	0	266.429	4
chr10.12704881.12705000	chr10	12704881	12705000	*	0	0	-33.4423	NA	0	0	0	118	-20817	NM_001163590	-	FALSE	0	0	160.286	2
chr10.127055641.127055760	chr10	127055641	127055760	*	0	0	27.8406	Lrp1	0	0	1	119	2445	NM_008512	-	FALSE	0	0	119.429	2
chr10.127059481.127059600	chr10	127059481	127059600	*	0	0	26.248	NA	0	0	0	120	-1278	NM_008512	-	FALSE	0	1	129.571	2
chr10.127090441.127090560	chr10	127090441	127090560	*	0	0	27.158	Stat6	0	0	1	121	10401	NM_009284	+	FALSE	0	0	335.714	4
chr10.127095841.127095960	chr10	127095841	127095960	*	0	0	27.6984	Stat6	0	0	1	122	7800	NM_008668	-	FALSE	0	0	195.286	3
chr10.127155361.127155480	chr10	127155361	127155480	*	0	0	29.4993	Myo1a	0	0	1	123	-6054	NM_001199971	+	TRUE	0	0	94.1429	3
chr10.127186441.127186560	chr10	127186441	127186560	*	0	0	36.6138	NA	0	0	0	124	2295	NM_007412	-	FALSE	0	0	68.8571	1
chr10.127186921.127187040	chr10	127186921	127187040	*	1.11022e-16	7.76597e-16	26.0538	Gpr182	0	1	0	125	1815	NM_007412	-	FALSE	0	0	88.4286	6
chr10.127527121.127527240	chr10	127527121	127527240	*	0	0	25.5009	Atp5b	0	1	0	126	-2599	NM_054078	+	FALSE	0	0	113	4
chr10.127674841.127674960	chr10	127674841	127674960	*	0	0	28.9193	Timeless	1	0	1	127	-162	NM_011589	+	TRUE	0	0	179.143	3
chr10.127684081.127684200	chr10	127684081	127684200	*	0	0	28.415	Timeless	0	0	1	128	-6987	NM_133996	+	FALSE	0	0	152.143	2
chr10.127684561.127684680	chr10	127684561	127684680	*	0	0	30.9133	Timeless	0	1	1	129	-6507	NM_133996	+	FALSE	0	0	240.571	7
chr10.127734841.127734960	chr10	127734841	127734960	*	0	0	31.8837	Il23a	1	1	1	130	181	NM_031252	-	TRUE	0	0	117.143	5
chr10.127799761.127799880	chr10	127799761	127799880	*	0	0	33.1967	NA	0	0	0	131	7214	NM_001081040	-	FALSE	0	0	50.8571	1
chr10.128020921.128021040	chr10	128020921	128021040	*	1.70164e-10	6.2484e-10	30.2002	Erbb3	0	0	1	132	5518	NM_010153	-	FALSE	0	0	33.5714	3
chr10.128174761.128174880	chr10	128174761	128174880	*	0	0	28.9152	Dgka	0	0	1	133	6233	NM_016811	-	FALSE	0	0	163.714	5
chr10.128240161.128240280	chr10	128240161	128240280	*	0	0	38.5267	1110012D08Rik	0	1	0	134	1147	NM_178066	-	TRUE	0	1	42.7143	3
chr10.128303161.128303280	chr10	128303161	128303280	*	0	0	32.5012	Sarnp	0	0	1	135	25495	NM_010272	-	FALSE	0	0	81.7143	1
chr10.128416081.128416200	chr10	128416081	128416200	*	0	0	28.1536	NA	0	0	0	136	-10770	NM_146861	+	FALSE	0	0	109.714	2
chr10.13558441.13558560	chr10	13558441	13558560	*	0	0	29.4768	Aig1	0	0	1	137	30077	NM_025446	-	FALSE	0	0	142.857	1
chr10.15020401.15020520	chr10	15020401	15020520	*	0	0	30.8663	NA	0	0	0	138	540308	NM_008703	+	FALSE	0	0	69.5714	1
chr10.16723441.16723560	chr10	16723441	16723560	*	0	0	27.1941	LOC100504235	0	0	1	139	92029	NR_038020	-	FALSE	0	0	226.286	2
chr10.16950121.16950240	chr10	16950121	16950240	*	0	0	27.1822	NA	0	0	0	140	-134534	NR_038020	-	FALSE	0	0	284.571	3
chr10.17204761.17204880	chr10	17204761	17204880	*	2.24265e-14	1.275e-13	-33.9712	NA	0	0	0	141	-238154	NM_010828	+	FALSE	0	0	43.2857	1
chr10.17241481.17241600	chr10	17241481	17241600	*	0	0	29.2097	NA	0	0	0	142	-201434	NM_010828	+	FALSE	0	0	70.2857	3
chr10.17650441.17650560	chr10	17650441	17650560	*	0	0	28.9339	Heca	0	0	1	143	17314	NM_001033432	-	FALSE	0	0	96.4286	1
chr10.18229801.18229920	chr10	18229801	18229920	*	0	0	-25.1005	Nhsl1	0	0	1	144	35963	NM_019487	-	FALSE	0	0	123.571	3
chr10.18230161.18230280	chr10	18230161	18230280	*	0	0	30.1039	Nhsl1	0	0	1	145	35603	NM_019487	-	FALSE	0	0	61.8571	1
chr10.18247441.18247560	chr10	18247441	18247560	*	1.55431e-15	9.92452e-15	-28.5878	Nhsl1	0	1	1	146	18323	NM_019487	-	FALSE	0	0	64.5714	1
chr10.18781681.18781800	chr10	18781681	18781800	*	0	0	-28.5994	NA	0	0	0	147	-46466	NM_009397	-	FALSE	0	0	133.857	2
chr10.18784681.18784800	chr10	18784681	18784800	*	0	0	-37.0213	NA	0	0	0	148	-49466	NM_009397	-	FALSE	0	0	134.857	2
chr10.19765561.19765680	chr10	19765561	19765680	*	0	0	28.1268	Map3k5	0	0	1	149	-103046	NM_008635	+	FALSE	0	0	164.429	1
chr10.19765921.19766040	chr10	19765921	19766040	*	2.38926e-09	7.58365e-09	27.2727	Map3k5	0	0	1	150	-102686	NM_008635	+	FALSE	0	0	40	1
chr10.19766161.19766280	chr10	19766161	19766280	*	0	0	39.2773	Map3k5	0	1	1	151	-102446	NM_008635	+	FALSE	0	0	65.5714	1
chr10.19766281.19766400	chr10	19766281	19766400	*	0	0	38.8101	Map3k5	0	1	1	152	-102326	NM_008635	+	FALSE	0	0	119.429	2
chr10.19797001.19797120	chr10	19797001	19797120	*	4.68736e-13	2.317e-12	28.6808	Map3k5	0	0	1	153	-71606	NM_008635	+	FALSE	0	0	48.7143	1
chr10.19917121.19917240	chr10	19917121	19917240	*	1.72244e-10	6.32011e-10	-27.45	Mtap7	0	0	1	154	4421	NR_045350	-	FALSE	0	0	47.1429	1
chr10.20005321.20005440	chr10	20005321	20005440	*	0	0	27.2521	NA	0	0	0	155	-26835	NM_153787	+	FALSE	0	0	134.429	2
chr10.20005681.20005800	chr10	20005681	20005800	*	0	0	26.8394	NA	0	0	0	156	-26475	NM_153787	+	FALSE	0	0	353.286	3
chr10.20006041.20006160	chr10	20006041	20006160	*	1.95055e-12	8.99029e-12	28.2354	NA	0	0	0	157	-26115	NM_153787	+	FALSE	0	0	51.5714	1
chr10.20006161.20006280	chr10	20006161	20006280	*	0	0	27.4094	NA	0	0	0	158	-25995	NM_153787	+	FALSE	0	0	101.571	3
chr10.20006761.20006880	chr10	20006761	20006880	*	0	0	28.6031	NA	0	0	0	159	-25395	NM_153787	+	FALSE	0	0	123.571	4
chr10.20157241.20157360	chr10	20157241	20157360	*	0	0	-35.5138	Pde7b	0	0	1	160	89618	NM_027930	+	FALSE	0	0	122.143	2
chr10.20157481.20157600	chr10	20157481	20157600	*	0	0	-32.066	Pde7b	0	0	1	161	89858	NM_027930	+	FALSE	0	0	214	6
chr10.20268841.20268960	chr10	20268841	20268960	*	0	0	32.1326	Pde7b	0	0	1	162	175915	NM_013875	-	TRUE	0	0	175	1
chr10.20352001.20352120	chr10	20352001	20352120	*	3.66374e-15	2.25398e-14	26.7103	Pde7b	0	0	1	163	92755	NM_013875	-	FALSE	0	0	67.4286	2
chr10.20602321.20602440	chr10	20602321	20602440	*	0	0	-29.8176	NA	0	0	0	164	-69913	NM_026203	+	FALSE	0	0	90.5714	1
chr10.20602561.20602680	chr10	20602561	20602680	*	0	0	-33.5319	NA	0	0	0	165	-69673	NM_026203	+	FALSE	0	0	211	2
chr10.20829721.20829840	chr10	20829721	20829840	*	0	0	31.5376	NA	0	0	0	166	50951	NM_001198914	-	FALSE	0	0	78.2857	2
chr10.20864641.20864760	chr10	20864641	20864760	*	0	0	25.3386	Myb	0	0	1	167	16031	NM_001198914	-	FALSE	0	0	111.286	4
chr10.20864761.20864880	chr10	20864761	20864880	*	0	0	31.2455	Myb	0	1	1	168	15911	NM_001198914	-	FALSE	0	0	65.4286	4
chr10.20972281.20972400	chr10	20972281	20972400	*	0	0	-31.7213	NA	0	0	0	169	-43385	NM_001145209	+	FALSE	0	0	164	2
chr10.21083041.21083160	chr10	21083041	21083160	*	0	0	-28.2681	Hbs1l	0	0	1	170	-13946	NM_178713	+	FALSE	0	0	126.143	3
chr10.21199321.21199440	chr10	21199321	21199440	*	5.55112e-16	3.68631e-15	-31.2999	NA	0	0	0	171	102217	NM_178713	+	FALSE	0	0	58	2
chr10.21567481.21567600	chr10	21567481	21567600	*	0	0	27.0812	NA	0	0	0	172	-34390	NM_001161845	+	FALSE	0	0	86.2857	2
chr10.21577561.21577680	chr10	21577561	21577680	*	0	0	31.5418	NA	0	0	0	173	-24310	NM_001161845	+	FALSE	0	0	93.5714	6
chr10.21611641.21611760	chr10	21611641	21611760	*	0	0	26.6072	Sgk1	0	0	1	174	9653	NM_001161845	+	FALSE	0	0	94.8571	2
chr10.21627001.21627120	chr10	21627001	21627120	*	3.36273e-10	1.19078e-09	-26.8915	Sgk1	0	0	1	175	25013	NM_001161845	+	FALSE	0	0	40	1
chr10.21642601.21642720	chr10	21642601	21642720	*	3.70505e-11	1.47427e-10	26.4172	Sgk1	0	0	1	176	40613	NM_001161845	+	FALSE	0	0	39.8571	2
chr10.21642841.21642960	chr10	21642841	21642960	*	0	0	34.1221	Sgk1	0	0	1	177	40853	NM_001161845	+	FALSE	0	0	236	4
chr10.21642961.21643080	chr10	21642961	21643080	*	0	0	32.5406	Sgk1	0	0	1	178	40973	NM_001161845	+	FALSE	0	0	98.7143	2
chr10.21643321.21643440	chr10	21643321	21643440	*	0	0	29.3803	Sgk1	0	0	1	179	41333	NM_001161845	+	FALSE	0	0	298	4
chr10.21643561.21643680	chr10	21643561	21643680	*	1.62093e-14	9.34817e-14	27.4675	Sgk1	0	0	1	180	41573	NM_001161845	+	FALSE	0	0	52.2857	2
chr10.21643681.21643800	chr10	21643681	21643800	*	0	0	32.5695	Sgk1	0	0	1	181	41693	NM_001161845	+	FALSE	0	0	520.571	4
chr10.21643801.21643920	chr10	21643801	21643920	*	0	0	28.7155	Sgk1	0	0	1	182	41813	NM_001161845	+	FALSE	0	0	330.714	2
chr10.21717601.21717720	chr10	21717601	21717720	*	0	0	26.6577	Sgk1	0	1	1	183	3131	NM_011361	+	FALSE	0	0	274.286	3
chr10.21720721.21720840	chr10	21720721	21720840	*	0	0	25.8278	NA	0	0	0	184	6251	NM_011361	+	FALSE	0	0	139	2
chr10.22022641.22022760	chr10	22022641	22022760	*	0	0	-28.2384	NA	0	0	1	185	-3766	NR_015465	+	FALSE	0	0	243.429	1
chr10.23516041.23516160	chr10	23516041	23516160	*	0	0	35.1072	NA	1	0	0	186	-632	NM_183116	+	TRUE	0	1	123.429	2
chr10.23516281.23516400	chr10	23516281	23516400	*	0	0	29.1131	NA	1	0	0	187	-392	NM_183116	+	TRUE	0	1	355.571	4
chr10.23546521.23546640	chr10	23546521	23546640	*	3.71603e-12	1.66105e-11	26.218	1110021L09Rik	0	1	0	188	-24628	NM_011979	+	FALSE	0	0	57.4286	2
chr10.23614321.23614440	chr10	23614321	23614440	*	0	0	28.433	NA	1	0	0	189	-54	NM_011704	+	TRUE	0	0	281.714	2
chr10.23886121.23886240	chr10	23886121	23886240	*	0	0	25.3459	Stx7	0	0	1	190	17000	NM_016797	+	FALSE	0	0	175.857	2
chr10.24099241.24099360	chr10	24099241	24099360	*	0	0	25.5194	NA	0	0	0	191	155920	NM_021509	+	FALSE	0	0	114.571	2
chr10.24355681.24355800	chr10	24355681	24355800	*	0	0	-31.2735	NA	0	0	0	192	40435	NM_010217	+	FALSE	0	0	92.1429	2
chr10.24478081.24478200	chr10	24478081	24478200	*	0	0	28.7177	NA	0	0	0	193	-46174	NM_008813	-	FALSE	0	0	176.429	3
chr10.24672361.24672480	chr10	24672361	24672480	*	0	0	26.9967	NA	0	0	0	194	-25086	NM_007482	-	FALSE	0	0	113.286	2
chr10.24672481.24672600	chr10	24672481	24672600	*	0	0	27.2732	NA	0	0	0	195	-25206	NM_007482	-	FALSE	0	0	171.714	2
chr10.24678841.24678960	chr10	24678841	24678960	*	0	0	27.2476	NA	0	0	0	196	-31566	NM_007482	-	FALSE	0	0	269.429	4
chr10.24678961.24679080	chr10	24678961	24679080	*	0	0	31.0754	NA	0	0	0	197	-31686	NM_007482	-	FALSE	0	0	63.7143	3
chr10.24831361.24831480	chr10	24831361	24831480	*	0	0	25.9711	NA	0	0	0	198	-184086	NM_007482	-	FALSE	0	0	233.714	3
chr10.24831601.24831720	chr10	24831601	24831720	*	0	0	37.3291	NA	0	0	0	199	-184326	NM_007482	-	FALSE	0	0	149.286	2
chr10.24860041.24860160	chr10	24860041	24860160	*	0	0	30.5614	NA	0	0	0	200	158810	NM_018747	-	FALSE	0	0	70.4286	3
chr10.25081681.25081800	chr10	25081681	25081800	*	0	0	27.6301	NA	0	0	1	201	2079	NM_001199265	+	FALSE	0	1	299.714	5
chr10.25092361.25092480	chr10	25092361	25092480	*	0	0	38.4235	NA	0	0	1	202	12759	NM_001199265	+	FALSE	0	0	194.571	4
chr10.25101841.25101960	chr10	25101841	25101960	*	0	0	32.8655	NA	0	0	1	203	22239	NM_001199265	+	FALSE	0	0	104.286	4
chr10.25101961.25102080	chr10	25101961	25102080	*	0	0	30.2773	NA	0	0	1	204	22359	NM_001199265	+	FALSE	0	0	98.4286	2
chr10.25152241.25152360	chr10	25152241	25152360	*	0	0	27.3571	Epb4.1l2	0	0	1	205	24069	NM_013511	+	FALSE	0	0	120	2
chr10.25152361.25152480	chr10	25152361	25152480	*	0	0	25.4685	Epb4.1l2	0	0	1	206	24189	NM_013511	+	FALSE	0	0	251.571	4
chr10.25239841.25239960	chr10	25239841	25239960	*	0	0	25.7525	Epb4.1l2	0	0	1	207	16119	NM_001195596	-	FALSE	0	0	104.143	1
chr10.26017441.26017560	chr10	26017441	26017560	*	0	0	28.7525	L3mbtl3	0	0	1	208	67930	NM_001013766	+	FALSE	0	0	78.2857	4
chr10.26096401.26096520	chr10	26096401	26096520	*	0	0	-29.1091	NA	0	0	0	209	-1411	NM_172787	-	TRUE	0	1	73	2
chr10.26489041.26489160	chr10	26489041	26489160	*	1.68977e-11	6.99718e-11	28.3573	NA	0	0	0	210	-3158	NM_176837	+	FALSE	0	0	49.2857	1
chr10.27807361.27807480	chr10	27807361	27807480	*	0	0	31.5629	Ptprk	0	0	1	211	12737	NM_008983	+	FALSE	0	0	99.8571	2
chr10.27886801.27886920	chr10	27886801	27886920	*	0	0	32.763	Ptprk	0	0	1	212	92177	NM_008983	+	FALSE	0	0	184.286	2
chr10.27887041.27887160	chr10	27887041	27887160	*	7.77156e-16	5.09818e-15	26.0419	Ptprk	0	0	1	213	92417	NM_008983	+	FALSE	0	0	70.8571	1
chr10.27905281.27905400	chr10	27905281	27905400	*	0	0	29.9996	Ptprk	0	0	1	214	110657	NM_008983	+	FALSE	0	0	107	1
chr10.30488281.30488400	chr10	30488281	30488400	*	0	0	26.2944	Ncoa7	0	0	1	215	34514	NM_172495	-	FALSE	0	0	305.143	3
chr10.33956401.33956520	chr10	33956401	33956520	*	0	0	42.2101	NA	0	0	0	216	-29045	NM_172508	-	FALSE	0	0	81.4286	2
chr10.36909841.36909960	chr10	36909841	36909960	*	0	0	-32.7202	NA	0	0	0	217	-51110	NM_008538	-	FALSE	0	0	85.1429	1
chr10.36909961.36910080	chr10	36909961	36910080	*	0	0	-30.8582	NA	0	0	0	218	-51230	NM_008538	-	FALSE	0	0	118.571	3
chr10.36910201.36910320	chr10	36910201	36910320	*	7.67941e-13	3.70381e-12	-28.5681	NA	0	0	0	219	-51470	NM_008538	-	FALSE	0	0	46.4286	2
chr10.37200121.37200240	chr10	37200121	37200240	*	0	0	29.0647	NA	0	0	0	220	-341390	NM_008538	-	FALSE	0	0	90	1
chr10.38883001.38883120	chr10	38883001	38883120	*	0	0	30.7572	Wisp3	1	0	1	221	481	NM_001127376	-	TRUE	0	0	70.1429	7
chr10.38961961.38962080	chr10	38961961	38962080	*	0	0	-33.8203	NA	0	0	0	222	-78362	NM_001127376	-	FALSE	0	0	132.143	1
chr10.39222001.39222120	chr10	39222001	39222120	*	0	0	31.306	Fyn	0	0	1	223	-110620	NM_134000	+	FALSE	0	0	71.4286	1
chr10.39222121.39222240	chr10	39222121	39222240	*	0	0	30.6581	Fyn	0	0	1	224	-110500	NM_134000	+	FALSE	0	0	68	2
chr10.39222481.39222600	chr10	39222481	39222600	*	0	0	40.6608	Fyn	0	0	1	225	-110140	NM_134000	+	FALSE	0	0	40.4286	1
chr10.39379441.39379560	chr10	39379441	39379560	*	0	0	35.6266	NA	0	0	1	226	46703	NM_134000	+	FALSE	0	0	95.5714	2
chr10.39883081.39883200	chr10	39883081	39883200	*	0	0	-38.722	NA	0	0	0	227	-21022	NM_001114332	-	FALSE	0	0	82.4286	1
chr10.39883201.39883320	chr10	39883201	39883320	*	0	0	-31.5202	NA	0	0	0	228	-21142	NM_001114332	-	FALSE	0	0	152.714	2
chr10.39883441.39883560	chr10	39883441	39883560	*	0	0	-31.9942	NA	0	0	0	229	-21382	NM_001114332	-	FALSE	0	0	126.571	2
chr10.40091401.40091520	chr10	40091401	40091520	*	1.92957e-13	9.95951e-13	-29.5816	Cdk19	0	0	1	230	22289	NM_001168304	+	FALSE	0	0	48	2
chr10.40092481.40092600	chr10	40092481	40092600	*	0	0	29.0087	Cdk19	0	0	1	231	23369	NM_001168304	+	FALSE	0	0	127.429	1
chr10.40350241.40350360	chr10	40350241	40350360	*	0	0	25.4278	Ddo	1	0	1	232	426	NM_027442	+	TRUE	0	0	118.714	4
chr10.40601161.40601280	chr10	40601161	40601280	*	0	0	28.1238	Cdc40	0	0	1	233	1670	NM_027879	-	FALSE	0	1	101.143	1
chr10.40941121.40941240	chr10	40941121	40941240	*	0	0	28.6301	Fig4	0	0	1	234	81808	NM_133999	-	FALSE	0	0	89.1429	2
chr10.41193601.41193720	chr10	41193601	41193720	*	0	0	-27.2995	NA	0	0	0	235	-2400	NM_001164433	+	FALSE	0	0	102	1
chr10.41193721.41193840	chr10	41193721	41193840	*	0	0	-27.704	NA	0	0	0	236	-2280	NM_001164433	+	FALSE	0	0	85.8571	1
chr10.41193841.41193960	chr10	41193841	41193960	*	0	0	-36.8337	NA	0	0	0	237	-2160	NM_001164433	+	FALSE	0	0	84.1429	1
chr10.41193961.41194080	chr10	41193961	41194080	*	0	0	-31.8662	NA	0	0	0	238	-2040	NM_001164433	+	FALSE	0	0	62.5714	1
chr10.41209201.41209320	chr10	41209201	41209320	*	0	0	25.3758	Smpd2	1	1	1	239	827	NM_009213	-	TRUE	0	1	96	3
chr10.41273521.41273640	chr10	41273521	41273640	*	0	0	28.0928	Ccdc162	0	0	1	240	-14182	NR_045341	+	FALSE	0	0	172.857	2
chr10.41606641.41606760	chr10	41606641	41606760	*	2.49134e-13	1.26939e-12	27.6754	Sesn1	1	0	1	241	-485	NM_001013370	+	TRUE	0	1	60.4286	1
chr10.41654761.41654880	chr10	41654761	41654880	*	0	0	38.197	Armc2	0	0	1	242	47518	NM_001013370	+	FALSE	0	0	106.286	4
chr10.41700961.41701080	chr10	41700961	41701080	*	0	0	32.4447	Armc2	0	0	1	243	37109	NM_001034858	-	FALSE	0	0	184.286	2
chr10.41711401.41711520	chr10	41711401	41711520	*	0	0	28.2391	Armc2	0	0	1	244	26669	NM_001034858	-	FALSE	0	0	253.714	2
chr10.41711881.41712000	chr10	41711881	41712000	*	6.10623e-15	3.67248e-14	25.9472	Armc2	0	0	1	245	26189	NM_001034858	-	FALSE	0	0	74.5714	3
chr10.41855161.41855280	chr10	41855161	41855280	*	0	0	27.5427	NA	0	0	0	246	-116974	NM_001034858	-	FALSE	0	0	80.4286	3
chr10.41970961.41971080	chr10	41970961	41971080	*	0	0	33.6854	Foxo3	0	0	1	247	25469	NM_019740	-	FALSE	0	0	136.714	3
chr10.42400561.42400680	chr10	42400561	42400680	*	1.71454e-11	7.09533e-11	25.1958	Ostm1	0	0	1	248	1841	NM_172416	+	FALSE	0	1	61.4286	4
chr10.42630721.42630840	chr10	42630721	42630840	*	0	0	27.5151	Scml4	0	0	1	249	50405	NM_172938	+	FALSE	0	0	149.429	1
chr10.42670561.42670680	chr10	42670561	42670680	*	1.11022e-16	7.76597e-16	27.1265	Scml4	0	0	1	250	90245	NM_172938	+	FALSE	0	0	67.7143	1
chr10.42688441.42688560	chr10	42688441	42688560	*	8.07976e-12	3.47413e-11	25.9616	NA	0	0	0	251	108125	NM_172938	+	FALSE	0	0	61.7143	1
chr10.43159681.43159800	chr10	43159681	43159800	*	0	0	27.2341	Pdss2	0	1	1	252	-39146	NM_199028	+	FALSE	0	0	190.571	1
chr10.43209721.43209840	chr10	43209721	43209840	*	8.03024e-13	3.86575e-12	28.0644	Bend3	0	0	1	253	10777	NM_199028	+	FALSE	0	0	57.7143	1
chr10.43302601.43302720	chr10	43302601	43302720	*	0	0	-27.896	Cd24a	0	1	0	254	3628	NM_009846	+	FALSE	0	0	144.143	3
chr10.43438801.43438920	chr10	43438801	43438920	*	0	0	27.355	NA	0	0	0	255	-27044	NR_040581	+	FALSE	0	0	94.1429	2
chr10.43438921.43439040	chr10	43438921	43439040	*	0	0	26.3153	NA	0	0	0	256	-26924	NR_040581	+	FALSE	0	0	123.857	5
chr10.43481881.43482000	chr10	43481881	43482000	*	0	0	-32.7934	NA	0	0	1	257	15919	NR_040581	+	FALSE	0	0	126.571	2
chr10.43713001.43713120	chr10	43713001	43713120	*	3.33067e-16	2.25203e-15	31.0824	Aim1	0	0	1	258	11533	NM_172393	-	FALSE	0	0	58.1429	1
chr10.44112001.44112120	chr10	44112001	44112120	*	0	0	25.8289	NA	0	0	0	259	32521	NR_035450	+	FALSE	0	0	129.714	3
chr10.44147881.44148000	chr10	44147881	44148000	*	0	0	30.7265	NA	0	0	0	260	30494	NM_007548	-	FALSE	0	0	198.571	5
chr10.44327161.44327280	chr10	44327161	44327280	*	1.11022e-16	7.76597e-16	-26.3891	NA	0	0	0	261	-148669	NM_007548	-	FALSE	0	0	78.5714	1
chr10.44475241.44475360	chr10	44475241	44475360	*	0	0	27.0681	NA	0	0	0	262	-296749	NM_007548	-	FALSE	0	0	180	2
chr10.44475361.44475480	chr10	44475361	44475480	*	0	0	28.3618	NA	0	0	0	263	-296869	NM_007548	-	FALSE	0	0	280.143	2
chr10.44475481.44475600	chr10	44475481	44475600	*	0	0	27.2338	NA	0	0	0	264	-296989	NM_007548	-	FALSE	0	0	163.143	2
chr10.44768881.44769000	chr10	44768881	44769000	*	3.03535e-11	1.21953e-10	30.3615	NA	0	0	0	265	-18020	NM_011156	+	FALSE	0	0	33.1429	1
chr10.45520321.45520440	chr10	45520321	45520440	*	0	0	-33.0347	NA	0	0	0	266	-7070	NR_040624	+	FALSE	0	0	95.5714	2
chr10.45527401.45527520	chr10	45527401	45527520	*	0	0	39.0507	NA	1	1	0	267	0	NR_040624	+	FALSE	0	0	73.5714	2
chr10.52096441.52096560	chr10	52096441	52096560	*	0	0	-28.4467	Gopc	0	0	1	268	5371	NM_001199272	-	FALSE	0	0	92.8571	1
chr10.52124641.52124760	chr10	52124641	52124760	*	0	0	32.2098	NA	0	0	0	269	-12593	NM_030250	+	FALSE	0	0	49.4286	3
chr10.53025721.53025840	chr10	53025721	53025840	*	0	0	27.2314	Gm9766	0	0	1	270	25647	NR_038015	+	FALSE	0	0	90.4286	2
chr10.53102761.53102880	chr10	53102761	53102880	*	1.20041e-10	4.48881e-10	25.945	NA	0	0	0	271	-3105	NM_001204983	-	FALSE	0	0	49.1429	1
chr10.53154961.53155080	chr10	53154961	53155080	*	0	0	29.2966	NA	0	0	0	272	-55305	NM_001204983	-	FALSE	0	0	386.429	4
chr10.53182561.53182680	chr10	53182561	53182680	*	1.26719e-11	5.32213e-11	26.2561	NA	0	0	0	273	56116	NR_037973	-	FALSE	0	0	51.7143	1
chr10.5632801.5632920	chr10	5632801	5632920	*	0	0	30.2998	Esr1	0	0	1	274	101576	NM_007956	-	FALSE	0	1	105.571	4
chr10.5741401.5741520	chr10	5741401	5741520	*	0	0	27.1007	NA	0	0	0	275	-6907	NM_007956	-	FALSE	0	0	92.7143	2
chr10.58064041.58064160	chr10	58064041	58064160	*	5.82423e-13	2.84501e-12	25.0151	Edar	0	1	0	276	74285	NM_010100	-	FALSE	0	0	72.7143	2
chr10.58914601.58914720	chr10	58914601	58914720	*	0	0	27.9743	Ccdc109a	0	0	1	277	-10075	NM_010959	-	FALSE	0	0	87.5714	1
chr10.58914841.58914960	chr10	58914841	58914960	*	4.44089e-16	2.9725e-15	27.4988	Ccdc109a	0	0	1	278	-10315	NM_010959	-	FALSE	0	0	77.1429	1
chr10.58966561.58966680	chr10	58966561	58966680	*	0	0	32.2248	Ccdc109a	0	0	1	279	-62035	NM_010959	-	FALSE	0	0	139.857	8
chr10.59000521.59000640	chr10	59000521	59000640	*	0	0	40.9569	Ccdc109a	0	0	1	280	78801	NM_001033259	-	FALSE	0	0	100.571	1
chr10.59040481.59040600	chr10	59040481	59040600	*	0	0	27.0061	Ccdc109a	0	0	1	281	38841	NM_001033259	-	FALSE	0	0	140.143	2
chr10.59052481.59052600	chr10	59052481	59052600	*	0	0	-29.7326	Ccdc109a	0	0	1	282	26841	NM_001033259	-	FALSE	0	0	164.714	3
chr10.59066641.59066760	chr10	59066641	59066760	*	0	0	29.248	Ccdc109a	0	0	1	283	12681	NM_001033259	-	FALSE	0	0	103.857	2
chr10.59155321.59155440	chr10	59155321	59155440	*	0	0	-27.6647	NA	0	0	0	284	-9943	NM_144822	+	FALSE	0	0	177	1
chr10.59305921.59306040	chr10	59305921	59306040	*	5.77316e-15	3.48072e-14	27.6523	Cbara1	0	0	1	285	-36299	NM_019965	+	FALSE	0	0	69	1
chr10.59348401.59348520	chr10	59348401	59348520	*	0	0	-28.1461	Dnajb12	0	0	1	286	6064	NM_019965	+	FALSE	0	0	81.5714	2
chr10.59406601.59406720	chr10	59406601	59406720	*	0	0	32.9544	NA	0	0	0	287	7799	NM_029083	-	FALSE	0	0	198	4
chr10.59441641.59441760	chr10	59441641	59441760	*	0	0	28.2772	NA	0	0	0	288	-23793	NM_026937	+	FALSE	0	0	130.571	3
chr10.59441761.59441880	chr10	59441761	59441880	*	0	0	29.6923	NA	0	0	0	289	-23673	NM_026937	+	FALSE	0	0	244.571	4
chr10.59443561.59443680	chr10	59443561	59443680	*	0	0	-27.8377	NA	0	0	0	290	-21873	NM_026937	+	FALSE	0	0	72.8571	3
chr10.59596681.59596800	chr10	59596681	59596800	*	0	0	28.2014	NA	0	0	0	291	27678	NM_052994	+	FALSE	0	0	121.143	2
chr10.59709241.59709360	chr10	59709241	59709360	*	2.22045e-16	1.52189e-15	31.3633	NA	0	0	0	292	-27234	NM_016803	-	FALSE	0	0	60.5714	3
chr10.59743321.59743440	chr10	59743321	59743440	*	0	0	43.471	Psap	0	0	1	293	2947	NM_001146120	+	FALSE	0	0	119.571	2
chr10.6007201.6007320	chr10	6007201	6007320	*	0	0	29.4681	Akap12	0	0	1	294	48770	NM_001033466	+	FALSE	0	0	478.571	5
chr10.6010561.6010680	chr10	6010561	6010680	*	0	0	48.7571	Akap12	0	0	1	295	52130	NM_001033466	+	FALSE	0	0	43.7143	1
chr10.6010921.6011040	chr10	6010921	6011040	*	0	0	29.2116	Akap12	0	0	1	296	52490	NM_001033466	+	FALSE	0	0	298.429	2
chr10.60276361.60276480	chr10	60276361	60276480	*	1.11022e-16	7.76597e-16	-27.2183	c("Unc5b", "LOC100503834", "LOC100503931")	0	0	1	297	17850	NM_029770	-	FALSE	0	0	66.4286	3
chr10.60295081.60295200	chr10	60295081	60295200	*	0	0	31.468	NA	1	0	0	298	-753	NM_029770	-	TRUE	0	1	67.8571	2
chr10.60543721.60543840	chr10	60543721	60543840	*	0	0	26.3971	NA	0	0	0	299	-8251	NM_025273	+	FALSE	0	0	120.143	4
chr10.6068161.6068280	chr10	6068161	6068280	*	0	0	29.3269	Akap12	0	0	1	300	11933	NM_031185	-	FALSE	0	0	207.714	2
chr10.60775681.60775800	chr10	60775681	60775800	*	4.10783e-15	2.51454e-14	27.2738	NA	0	0	0	301	15099	NM_011073	+	FALSE	0	0	73.4286	1
chr10.60865801.60865920	chr10	60865801	60865920	*	0	0	30.0233	NA	0	0	0	302	-14800	NM_013611	+	FALSE	0	0	75.8571	1
chr10.6097081.6097200	chr10	6097081	6097200	*	3.33067e-15	2.0568e-14	25.6663	NA	0	0	0	303	-16870	NM_031185	-	FALSE	0	0	81.7143	2
chr10.61054321.61054440	chr10	61054321	61054440	*	1.11022e-16	7.76597e-16	30.1926	NA	0	0	0	304	-3792	NM_001177511	+	FALSE	0	0	64.5714	2
chr10.61394521.61394640	chr10	61394521	61394640	*	0	0	28.9609	Col13a1	0	0	1	305	47217	NM_007731	-	FALSE	0	0	104	3
chr10.61394641.61394760	chr10	61394641	61394760	*	0	0	26.8989	Col13a1	0	0	1	306	47097	NM_007731	-	FALSE	0	0	81.5714	1
chr10.61394761.61394880	chr10	61394761	61394880	*	0	0	35.3829	Col13a1	0	0	1	307	46977	NM_007731	-	FALSE	0	0	86.1429	1
chr10.61777201.61777320	chr10	61777201	61777320	*	7.17204e-14	3.87254e-13	30.3506	Hk1	0	0	1	308	25850	NM_001146100	-	FALSE	0	0	50.7143	1
chr10.61790161.61790280	chr10	61790161	61790280	*	0	0	-27.6402	Hk1	0	0	1	309	12890	NM_001146100	-	FALSE	0	0	106.429	4
chr10.61792921.61793040	chr10	61792921	61793040	*	0	0	33.1104	Hk1	0	0	1	310	10130	NM_001146100	-	FALSE	0	0	91.2857	1
chr10.61795321.61795440	chr10	61795321	61795440	*	0	0	33.1405	Hk1	0	0	1	311	7730	NM_001146100	-	FALSE	0	0	129.286	3
chr10.61795441.61795560	chr10	61795441	61795560	*	0	0	36.0401	Hk1	0	0	1	312	7610	NM_001146100	-	FALSE	0	0	116.714	4
chr10.62006521.62006640	chr10	62006521	62006640	*	0	0	-25.6132	NA	0	0	0	313	34566	NM_028197	-	FALSE	0	0	212.143	5
chr10.62016361.62016480	chr10	62016361	62016480	*	0	0	-31.5548	NA	0	0	0	314	24726	NM_028197	-	FALSE	0	0	346.143	3
chr10.62016841.62016960	chr10	62016841	62016960	*	0	0	-32.3256	NA	0	0	0	315	24246	NM_028197	-	FALSE	0	0	76.1429	2
chr10.62019241.62019360	chr10	62019241	62019360	*	0	0	-39.4855	NA	0	0	0	316	21846	NM_028197	-	FALSE	0	0	90.8571	2
chr10.62329441.62329560	chr10	62329441	62329560	*	9.59233e-14	5.11234e-13	30.7432	Tet1	0	0	1	317	13203	NM_001253857	-	FALSE	0	0	47.1429	2
chr10.62353801.62353920	chr10	62353801	62353920	*	0	0	-28.523	NA	0	0	0	318	-11040	NM_027384	-	FALSE	0	0	90.8571	3
chr10.6240601.6240720	chr10	6240601	6240720	*	0	0	32.3667	Mthfd1l	0	0	1	319	132747	NM_001170785	-	FALSE	0	0	75	1
chr10.6246121.6246240	chr10	6246121	6246240	*	0	0	-37.9886	Mthfd1l	0	0	1	320	127227	NM_001170785	-	FALSE	0	0	56.7143	2
chr10.6246361.6246480	chr10	6246361	6246480	*	0	0	-33.0763	Mthfd1l	0	0	1	321	126987	NM_001170785	-	FALSE	0	0	242.571	4
chr10.62510641.62510760	chr10	62510641	62510760	*	0	0	-34.0556	3110049J23Rik	0	1	1	322	-13605	NM_026701	+	FALSE	0	0	65.7143	4
chr10.62519761.62519880	chr10	62519761	62519880	*	0	0	30.1627	3110049J23Rik	0	0	1	323	-4485	NM_026701	+	FALSE	0	0	59.7143	5
chr10.62519881.62520000	chr10	62519881	62520000	*	0	0	28.8754	3110049J23Rik	0	0	1	324	-4365	NM_026701	+	FALSE	0	0	136	4
chr10.6280441.6280560	chr10	6280441	6280560	*	0	0	30.9948	Mthfd1l	0	0	1	325	92907	NM_001170785	-	FALSE	0	0	80.4286	1
chr10.62920081.62920200	chr10	62920081	62920200	*	3.09752e-14	1.7369e-13	26.9116	Ctnna3	1	0	1	326	-59	NM_001164376	+	TRUE	0	0	67.5714	1
chr10.62920201.62920320	chr10	62920201	62920320	*	0	0	28.5689	Ctnna3	1	1	1	327	0	NM_001164376	+	TRUE	0	0	145.571	2
chr10.6304681.6304800	chr10	6304681	6304800	*	0	0	26.9187	Mthfd1l	0	1	1	328	68667	NM_001170785	-	FALSE	0	0	421.571	5
chr10.6309241.6309360	chr10	6309241	6309360	*	0	0	33.0233	Mthfd1l	0	0	1	329	64107	NM_001170785	-	FALSE	0	0	87.1429	1
chr10.6405361.6405480	chr10	6405361	6405480	*	0	0	36.8696	Plekhg1	0	0	1	330	-31896	NM_001170786	-	FALSE	0	0	106.286	4
chr10.6561001.6561120	chr10	6561001	6561120	*	3.4972e-14	1.9511e-13	31.2876	Plekhg1	0	0	1	331	45045	NM_001159942	-	FALSE	0	0	52.1429	1
chr10.66384241.66384360	chr10	66384241	66384360	*	0	0	38.7873	NA	0	0	0	332	175377	NM_001204915	-	FALSE	0	0	89.5714	3
chr10.66384361.66384480	chr10	66384361	66384480	*	0	0	34.8415	NA	0	0	0	333	175257	NM_001204915	-	FALSE	0	0	122.429	4
chr10.66384841.66384960	chr10	66384841	66384960	*	0	0	31.2147	NA	0	0	0	334	174777	NM_001204915	-	FALSE	0	0	128.714	4
chr10.66391081.66391200	chr10	66391081	66391200	*	0	0	36.3915	NA	0	0	0	335	168537	NM_001204915	-	FALSE	0	0	87.5714	2
chr10.66511441.66511560	chr10	66511441	66511560	*	0	0	30.8014	Reep3	0	0	1	336	48177	NM_001204915	-	FALSE	0	0	137.143	4
chr10.66546601.66546720	chr10	66546601	66546720	*	0	0	29.7475	Reep3	0	0	1	337	13017	NM_001204915	-	FALSE	0	0	109	2
chr10.66546721.66546840	chr10	66546721	66546840	*	0	0	38.0512	Reep3	0	0	1	338	12897	NM_001204915	-	FALSE	0	0	76.2857	1
chr10.66665401.66665520	chr10	66665401	66665520	*	0	0	-29.5154	Jmjd1c	0	0	1	339	16905	NM_001242396	+	FALSE	0	0	236	4
chr10.66792481.66792600	chr10	66792481	66792600	*	0	0	41.0125	NA	0	0	0	340	-44453	NM_001036293	-	FALSE	0	0	71.7143	3
chr10.67248481.67248600	chr10	67248481	67248600	*	0	0	32.0217	NA	0	0	0	341	126811	NM_178679	-	FALSE	0	0	83.1429	1
chr10.67589041.67589160	chr10	67589041	67589160	*	4.78173e-13	2.36107e-12	26.3052	Arid5b	0	0	1	342	146697	NM_001081346	+	FALSE	0	0	59.2857	1
chr10.67589641.67589760	chr10	67589641	67589760	*	0	0	26.0141	Arid5b	0	0	1	343	147297	NM_001081346	+	FALSE	0	0	141.286	1
chr10.67590001.67590120	chr10	67590001	67590120	*	4.77396e-15	2.90278e-14	26.2929	Arid5b	0	0	1	344	147657	NM_001081346	+	FALSE	0	0	55	1
chr10.67642321.67642440	chr10	67642321	67642440	*	1.11022e-16	7.76597e-16	35.1927	Arid5b	0	0	1	345	99035	NM_023598	-	FALSE	0	0	42	2
chr10.67927681.67927800	chr10	67927681	67927800	*	0	0	42.8397	1700040L02Rik	0	0	1	346	76824	NM_028491	-	FALSE	0	0	184.143	2
chr10.68021521.68021640	chr10	68021521	68021640	*	0	0	28.9114	NA	0	0	0	347	-16899	NM_028491	-	FALSE	0	0	217.286	5
chr10.69046681.69046800	chr10	69046681	69046800	*	1.95503e-11	8.03627e-11	31.7887	Ank3	0	0	1	348	50227	NM_170689	+	FALSE	0	0	39.5714	1
chr10.69046801.69046920	chr10	69046801	69046920	*	0	0	25.649	Ank3	0	0	1	349	50347	NM_170689	+	FALSE	0	0	179.286	2
chr10.69248281.69248400	chr10	69248281	69248400	*	0	0	36.6282	Ank3	0	0	1	350	-139880	NM_170687	+	TRUE	0	0	135	6
chr10.69373081.69373200	chr10	69373081	69373200	*	0	0	31.6582	Ank3	0	0	1	351	-15080	NM_170687	+	FALSE	0	0	62.1429	2
chr10.69583801.69583920	chr10	69583801	69583920	*	0	0	44.5492	Ccdc6	0	0	1	352	23934	NM_001111121	+	FALSE	0	0	57.7143	2
chr10.69584041.69584160	chr10	69584041	69584160	*	0	0	34.7857	Ccdc6	0	0	1	353	24174	NM_001111121	+	FALSE	0	0	263.857	3
chr10.69584161.69584280	chr10	69584161	69584280	*	0	0	26.3056	Ccdc6	0	0	1	354	24294	NM_001111121	+	FALSE	0	0	334.857	4
chr10.69594721.69594840	chr10	69594721	69594840	*	0	0	26.2108	Ccdc6	0	0	1	355	34854	NM_001111121	+	FALSE	0	0	81.4286	3
chr10.69643681.69643800	chr10	69643681	69643800	*	0	0	-27.5198	Ccdc6	0	0	1	356	-23615	NR_038041	+	FALSE	0	0	234.714	4
chr10.69658081.69658200	chr10	69658081	69658200	*	0	0	-26.8447	NA	0	0	0	357	-9215	NR_038041	+	FALSE	0	0	507	5
chr10.70521961.70522080	chr10	70521961	70522080	*	7.46422e-11	2.85976e-10	27.7902	Bicc1	0	0	1	358	100303	NM_031397	-	FALSE	0	0	48.7143	1
chr10.70656001.70656120	chr10	70656001	70656120	*	0	0	38.595	NA	0	0	0	359	-11214	NR_038040	-	FALSE	0	0	140.286	7
chr10.70714801.70714920	chr10	70714801	70714920	*	0	0	25.6492	NA	0	0	0	360	-14010	NM_009360	-	FALSE	0	0	137.857	4
chr10.7107841.7107960	chr10	7107841	7107960	*	2.22933e-13	1.14267e-12	-29.3457	NA	0	0	0	361	29073	NM_001204916	+	FALSE	0	0	44.2857	1
chr10.7385161.7385280	chr10	7385161	7385280	*	1.60777e-09	5.21695e-09	26.5548	NA	0	0	0	362	-1780	NM_008786	-	FALSE	0	1	39	3
chr10.74745481.74745600	chr10	74745481	74745600	*	0	0	-25.5397	Cytsa	0	0	1	363	-34088	NM_009630	+	FALSE	0	0	123.857	1
chr10.74745601.74745720	chr10	74745601	74745720	*	0	0	-28.2689	Cytsa	0	0	1	364	-33968	NM_009630	+	FALSE	0	0	227.286	2
chr10.74836561.74836680	chr10	74836561	74836680	*	0	0	27.6235	NA	0	0	0	365	21763	NR_033602	+	FALSE	0	0	135.857	4
chr10.74836681.74836800	chr10	74836681	74836800	*	1.87106e-12	8.63792e-12	26.4031	NA	0	0	0	366	21883	NR_033602	+	FALSE	0	0	63.7143	3
chr10.74836801.74836920	chr10	74836801	74836920	*	1.83298e-13	9.48672e-13	27.0079	NA	0	0	0	367	22003	NR_033602	+	FALSE	0	0	66.4286	5
chr10.74836921.74837040	chr10	74836921	74837040	*	0	0	28.5993	NA	0	0	0	368	22123	NR_033602	+	FALSE	0	0	101	4
chr10.74860201.74860320	chr10	74860201	74860320	*	0	0	34.2074	NA	0	0	0	369	-9459	NM_133995	+	FALSE	0	0	220.857	2
chr10.74919121.74919240	chr10	74919121	74919240	*	0	0	43.1104	NA	0	0	1	370	6868	NR_045841	+	FALSE	0	0	110.857	3
chr10.74919361.74919480	chr10	74919361	74919480	*	0	0	35.4828	NA	0	0	1	371	7108	NR_045841	+	FALSE	0	0	142.286	6
chr10.74919481.74919600	chr10	74919481	74919600	*	0	0	27.8194	NA	0	0	1	372	7228	NR_045841	+	FALSE	0	0	99	2
chr10.75028441.75028560	chr10	75028441	75028560	*	1.11022e-16	7.76597e-16	-27.3676	NA	0	0	0	373	-5367	NM_198860	-	FALSE	0	0	85.1429	3
chr10.75111961.75112080	chr10	75111961	75112080	*	5.08704e-13	2.50392e-12	27.5162	Cabin1	0	0	1	374	-5209	NM_001162913	-	FALSE	0	0	56.7143	1
chr10.75323641.75323760	chr10	75323641	75323760	*	1.26898e-13	6.67878e-13	26.7115	NA	1	0	0	375	-647	NM_010798	-	TRUE	0	1	59	2
chr10.75406681.75406800	chr10	75406681	75406800	*	0	0	29.1177	NA	0	0	0	376	-4257	NM_009514	+	FALSE	0	0	180.286	2
chr10.75406801.75406920	chr10	75406801	75406920	*	2.55724e-09	8.08621e-09	28.4027	NA	0	0	0	377	-4137	NM_009514	+	FALSE	0	0	33.4286	1
chr10.75407281.75407400	chr10	75407281	75407400	*	0	0	29.4428	NA	0	0	0	378	-3657	NM_009514	+	FALSE	0	0	261.143	2
chr10.7590721.7590840	chr10	7590721	7590840	*	0	0	30.2967	NA	0	0	0	379	34544	NR_039563	+	FALSE	0	0	61.1429	2
chr10.76426801.76426920	chr10	76426801	76426920	*	0	0	26.6248	NA	0	0	0	380	-2110	NM_021568	-	FALSE	0	1	155.429	3
chr10.76470721.76470840	chr10	76470721	76470840	*	0	0	35.7143	NA	0	0	0	381	-3900	NR_045882	+	FALSE	0	0	47.1429	3
chr10.76552441.76552560	chr10	76552441	76552560	*	0	0	25.943	Col18a1	0	0	1	382	23891	NM_001109991	-	FALSE	0	0	359.857	5
chr10.76560241.76560360	chr10	76560241	76560360	*	5.08815e-13	2.50441e-12	25.959	Col18a1	0	0	1	383	16091	NM_001109991	-	FALSE	0	0	63.7143	1
chr10.76560361.76560480	chr10	76560361	76560480	*	0	0	28.0495	Col18a1	0	0	1	384	15971	NM_001109991	-	FALSE	0	0	236.714	2
chr10.76560841.76560960	chr10	76560841	76560960	*	1.11022e-16	7.76597e-16	28.2628	Col18a1	0	0	1	385	15491	NM_001109991	-	FALSE	0	0	73.1429	2
chr10.76576801.76576920	chr10	76576801	76576920	*	0	0	29.8802	Col18a1	1	0	1	386	-352	NM_001109991	-	TRUE	0	0	154.143	2
chr10.76576921.76577040	chr10	76576921	76577040	*	0	0	32.3037	Col18a1	1	0	1	387	-472	NM_001109991	-	TRUE	0	0	140.857	1
chr10.76674361.76674480	chr10	76674361	76674480	*	0	0	32.9492	NA	0	0	0	388	-45087	NM_009929	-	FALSE	0	0	144	3
chr10.76713961.76714080	chr10	76713961	76714080	*	0	0	28.7042	NA	0	0	0	389	7889	NR_026944	-	FALSE	0	0	125.571	4
chr10.76714081.76714200	chr10	76714081	76714200	*	0	0	28.8155	NA	0	0	0	390	7769	NR_026944	-	FALSE	0	0	178.714	5
chr10.76714321.76714440	chr10	76714321	76714440	*	0	0	27.8226	NA	0	0	0	391	7529	NR_026944	-	FALSE	0	0	88.7143	3
chr10.76992841.76992960	chr10	76992841	76992960	*	0	0	-35.688	NA	1	0	0	392	-133	NM_008404	+	TRUE	0	0	223	3
chr10.76993201.76993320	chr10	76993201	76993320	*	0	0	-30.7987	Itgb2	1	1	1	393	110	NM_008404	+	TRUE	0	0	179.429	2
chr10.76993321.76993440	chr10	76993321	76993440	*	0	0	-44.6978	Itgb2	1	0	1	394	230	NM_008404	+	TRUE	0	0	60.4286	1
chr10.77043361.77043480	chr10	77043361	77043480	*	1.01807e-13	5.41118e-13	32.4792	NA	0	0	0	395	-1032	NM_145925	+	FALSE	0	1	41.7143	2
chr10.77070481.77070600	chr10	77070481	77070600	*	0	0	32.6018	Sumo3	0	0	1	396	1504	NM_019929	+	FALSE	0	1	91.5714	1
chr10.7746841.7746960	chr10	7746841	7746960	*	0	0	30.0485	NA	0	0	0	397	-70921	NM_138667	-	FALSE	0	0	245.429	2
chr10.77723161.77723280	chr10	77723161	77723280	*	0	0	29.4483	NA	0	0	0	398	-15775	NM_001081055	-	FALSE	0	0	75.1429	2
chr10.77774641.77774760	chr10	77774641	77774760	*	0	0	31.152	Agpat3	0	0	1	399	39686	NM_053014	-	FALSE	0	0	164.571	3
chr10.77835601.77835720	chr10	77835601	77835720	*	0	0	-27.1117	NA	0	0	0	400	-21157	NM_053014	-	FALSE	0	0	453.857	3
chr10.77835961.77836080	chr10	77835961	77836080	*	0	0	-26.2048	NA	0	0	0	401	-21517	NM_053014	-	FALSE	0	0	328	6
chr10.77928481.77928600	chr10	77928481	77928600	*	0	0	-29.477	NA	1	0	0	402	-789	NM_172134	-	TRUE	0	1	74.8571	1
chr10.7806241.7806360	chr10	7806241	7806360	*	8.19012e-13	3.93808e-12	29.1882	NA	0	0	0	403	-130321	NM_138667	-	FALSE	0	0	52.5714	1
chr10.79016521.79016640	chr10	79016521	79016640	*	0	0	28.8721	Mier2	0	0	1	404	1197	NM_027422	-	FALSE	0	1	88.8571	3
chr10.79016641.79016760	chr10	79016641	79016760	*	0	0	37.2693	Mier2	0	0	1	405	1077	NM_027422	-	FALSE	0	1	76.8571	2
chr10.79146841.79146960	chr10	79146841	79146960	*	0	0	32.1773	Cdc34	0	0	1	406	1903	NM_177613	+	FALSE	0	1	93.5714	3
chr10.79158481.79158600	chr10	79158481	79158600	*	1.33227e-14	7.74342e-14	30.1873	NA	0	0	0	407	6718	NM_008504	+	FALSE	0	0	60.4286	1
chr10.79158601.79158720	chr10	79158601	79158720	*	6.21725e-15	3.73651e-14	25.8899	NA	0	0	0	408	6838	NM_008504	+	FALSE	0	0	79	3
chr10.79158841.79158960	chr10	79158841	79158960	*	5.55112e-15	3.35282e-14	28.9932	NA	0	0	0	409	7078	NM_008504	+	FALSE	0	0	69	2
chr10.79159081.79159200	chr10	79159081	79159200	*	0	0	31.2639	NA	0	0	0	410	7318	NM_008504	+	FALSE	0	0	116.286	1
chr10.79199401.79199520	chr10	79199401	79199520	*	3.33067e-16	2.25203e-15	27.8866	Polrmt	0	1	1	411	9807	NM_172551	-	FALSE	0	1	54.5714	8
chr10.79244761.79244880	chr10	79244761	79244880	*	0	0	-30.0541	c("Fstl3", "Prssl1")	0	1	0	412	4744	NM_031380	+	FALSE	0	1	117.143	2
chr10.79247281.79247400	chr10	79247281	79247400	*	0	0	30.9163	Prssl1	0	1	1	413	4331	NM_001042710	-	FALSE	0	0	79.1429	5
chr10.79257121.79257240	chr10	79257121	79257240	*	0	0	27.8423	c("LOC100503626", "Palm")	1	0	1	414	806	NM_001161747	+	TRUE	0	1	193.857	6
chr10.79264921.79265040	chr10	79264921	79265040	*	9.70224e-12	4.13097e-11	27.0043	Palm	0	0	1	415	8606	NM_001161747	+	FALSE	0	0	76.5714	3
chr10.79265041.79265160	chr10	79265041	79265160	*	7.79394e-11	2.97896e-10	26.7792	Palm	0	0	1	416	8726	NM_001161747	+	FALSE	0	0	49.5714	3
chr10.79303321.79303440	chr10	79303321	79303440	*	0	0	37.9512	NA	0	0	0	417	-13910	NM_008956	+	FALSE	0	0	44.2857	1
chr10.79312681.79312800	chr10	79312681	79312800	*	0	0	-26.1079	NA	0	0	0	418	-4550	NM_008956	+	FALSE	0	0	103.857	2
chr10.79380721.79380840	chr10	79380721	79380840	*	3.33067e-15	2.0568e-14	28.4154	Kiss1r	0	1	0	419	1007	NM_053244	+	FALSE	0	1	58	1
chr10.79380841.79380960	chr10	79380841	79380960	*	0	0	27.3647	Kiss1r	0	1	0	420	1127	NM_053244	+	FALSE	0	1	113	2
chr10.79381201.79381320	chr10	79381201	79381320	*	0	0	29.2628	Kiss1r	0	1	0	421	1487	NM_053244	+	FALSE	0	1	75.5714	6
chr10.79397041.79397160	chr10	79397041	79397160	*	0	0	27.6006	Arid3a	0	0	1	422	7226	NM_007880	+	FALSE	0	0	136	4
chr10.79397161.79397280	chr10	79397161	79397280	*	0	0	29.8312	Arid3a	0	0	1	423	7346	NM_007880	+	FALSE	0	0	192.571	5
chr10.79397401.79397520	chr10	79397401	79397520	*	0	0	30.7127	Arid3a	0	0	1	424	7586	NM_007880	+	FALSE	0	0	237.429	3
chr10.79432321.79432440	chr10	79432321	79432440	*	5.60768e-10	1.93045e-09	26.2624	NA	0	0	0	425	-1029	NM_130455	+	FALSE	0	1	49	1
chr10.79460521.79460640	chr10	79460521	79460640	*	0	0	36.488	Abca7	1	1	1	426	163	NM_013850	+	TRUE	0	0	74.4286	3
chr10.79466281.79466400	chr10	79466281	79466400	*	0	0	31.8041	Abca7	0	0	1	427	5923	NM_013850	+	FALSE	0	0	142.714	3
chr10.79466401.79466520	chr10	79466401	79466520	*	0	0	30.5674	Abca7	0	0	1	428	6043	NM_013850	+	FALSE	0	0	149.429	2
chr10.79477441.79477560	chr10	79477441	79477560	*	0	0	33.1528	Abca7	0	0	1	429	-1857	NM_001142701	+	FALSE	0	1	153.286	5
chr10.79479481.79479600	chr10	79479481	79479600	*	0	0	-29.1193	Hmha1	1	1	0	430	66	NM_001142701	+	TRUE	0	0	139.429	4
chr10.79479601.79479720	chr10	79479601	79479720	*	0	0	-25.2822	Hmha1	1	1	1	431	186	NM_001142701	+	TRUE	0	0	167.714	5
chr10.79480561.79480680	chr10	79480561	79480680	*	4.36284e-12	1.93534e-11	-25.4646	Hmha1	0	1	0	432	1146	NM_001142701	+	TRUE	0	0	59.8571	4
chr10.7948081.7948200	chr10	7948081	7948200	*	2.53871e-10	9.12277e-10	26.1203	Ust	0	0	1	433	-272161	NM_138667	-	FALSE	0	0	52.4286	1
chr10.79521121.79521240	chr10	79521121	79521240	*	0	0	35.9986	Sbno2	0	1	1	434	4341	NM_001037741	+	FALSE	0	1	60.7143	5
chr10.79533841.79533960	chr10	79533841	79533960	*	0	0	41.9011	Sbno2	0	0	1	435	17061	NM_001037741	+	FALSE	0	0	58.7143	1
chr10.79534081.79534200	chr10	79534081	79534200	*	0	0	30.4762	Sbno2	0	0	1	436	17301	NM_001037741	+	FALSE	0	0	72.7143	2
chr10.79608481.79608600	chr10	79608481	79608600	*	0	0	26.2005	Atp5d	0	1	0	437	-2435	NM_021565	+	FALSE	0	0	238.714	2
chr10.79628641.79628760	chr10	79628641	79628760	*	0	0	36.052	NA	0	0	0	438	-1826	NM_007705	+	FALSE	0	1	60.5714	5
chr10.80121361.80121480	chr10	80121361	80121480	*	0	0	-26.4945	NA	0	0	0	439	-1546	NM_145361	-	FALSE	0	0	118	1
chr10.80142121.80142240	chr10	80142121	80142240	*	0	0	30.1419	NA	0	0	0	440	-7401	NM_021462	-	FALSE	0	0	69.5714	1
chr10.80155681.80155800	chr10	80155681	80155800	*	0	0	-35.3946	Mobkl2a	0	0	1	441	8766	NM_172457	-	FALSE	0	1	167.429	4
chr10.80157721.80157840	chr10	80157721	80157840	*	0	0	-33.7193	Mobkl2a	0	0	1	442	6726	NM_172457	-	FALSE	0	0	109.714	4
chr10.80160241.80160360	chr10	80160241	80160360	*	0	0	-25.9378	Mobkl2a	0	0	1	443	4206	NM_172457	-	FALSE	0	0	265	5
chr10.80163481.80163600	chr10	80163481	80163600	*	0	0	-25.0192	Mobkl2a	1	0	1	444	966	NM_172457	-	TRUE	0	1	198.571	2
chr10.8016961.8017080	chr10	8016961	8017080	*	0	0	36.1747	Ust	0	0	1	445	221544	NM_177387	-	FALSE	0	0	76.5714	1
chr10.80423401.80423520	chr10	80423401	80423520	*	0	0	31.0292	Gng7	0	0	1	446	30567	NM_008655	+	FALSE	0	0	90.7143	2
chr10.80603761.80603880	chr10	80603761	80603880	*	0	0	29.2703	Zbtb7a	0	0	1	447	4747	NM_010731	+	FALSE	0	0	67.7143	3
chr10.80780041.80780160	chr10	80780041	80780160	*	0	0	26.2603	Pip5k1c	0	1	1	448	-3688	NM_027381	+	FALSE	0	0	209.714	14
chr10.80827441.80827560	chr10	80827441	80827560	*	0	0	26.7513	4930404N11Rik	0	1	1	449	1006	NM_001014836	-	FALSE	1	0	221.714	13
chr10.80828401.80828520	chr10	80828401	80828520	*	3.58602e-14	1.99872e-13	28.0467	4930404N11Rik	1	1	1	450	46	NM_001014836	-	TRUE	0	1	68.5714	4
chr10.80852401.80852520	chr10	80852401	80852520	*	0	0	34.0884	LOC100503793	0	0	0	451	-3289	NM_001099917	+	FALSE	0	0	61.4286	1
chr10.80864161.80864280	chr10	80864161	80864280	*	0	0	25.5241	Nfic	0	0	1	452	8354	NM_001099917	+	FALSE	0	0	111.286	3
chr10.80864401.80864520	chr10	80864401	80864520	*	0	0	38.8837	Nfic	0	0	1	453	8594	NM_001099917	+	FALSE	0	0	61	2
chr10.80864641.80864760	chr10	80864641	80864760	*	0	0	28.4766	Nfic	0	0	1	454	8834	NM_001099917	+	FALSE	0	0	57	5
chr10.80865001.80865120	chr10	80865001	80865120	*	0	0	28.4453	Nfic	0	0	1	455	9194	NM_001099917	+	FALSE	0	0	103.429	1
chr10.80865121.80865240	chr10	80865121	80865240	*	0	0	34.3531	Nfic	0	0	1	456	9314	NM_001099917	+	FALSE	0	0	178.857	3
chr10.80874121.80874240	chr10	80874121	80874240	*	0	0	36.1131	Nfic	0	0	1	457	15679	NM_026756	-	FALSE	0	0	110.857	4
chr10.80874481.80874600	chr10	80874481	80874600	*	0	0	27.6083	Nfic	0	0	1	458	15319	NM_026756	-	FALSE	0	0	83.4286	5
chr10.80874601.80874720	chr10	80874601	80874720	*	0	0	41.7806	Nfic	0	0	1	459	15199	NM_026756	-	FALSE	0	0	52.1429	3
chr10.80874721.80874840	chr10	80874721	80874840	*	2.22045e-16	1.52189e-15	34.041	Nfic	0	0	1	460	15079	NM_026756	-	FALSE	0	0	46.5714	2
chr10.80885161.80885280	chr10	80885161	80885280	*	0	0	32.7769	Nfic	0	0	1	461	4639	NM_026756	-	FALSE	0	1	71.7143	1
chr10.80887801.80887920	chr10	80887801	80887920	*	5.55112e-16	3.68631e-15	25.5444	Nfic	0	0	1	462	1999	NM_026756	-	FALSE	0	0	68.4286	3
chr10.80888161.80888280	chr10	80888161	80888280	*	0	0	33.553	Nfic	0	0	1	463	1639	NM_026756	-	FALSE	0	0	131.714	5
chr10.80960401.80960520	chr10	80960401	80960520	*	0	0	-29.8764	S1pr4	0	1	0	464	-1294	NM_134009	-	FALSE	0	1	744.143	5
chr10.80961601.80961720	chr10	80961601	80961720	*	0	0	-37.1631	S1pr4	0	1	0	465	1163	NM_010102	-	FALSE	0	1	145	7
chr10.80961841.80961960	chr10	80961841	80961960	*	0	0	-28.5415	S1pr4	1	1	0	466	923	NM_010102	-	TRUE	1	1	273.143	8
chr10.80961961.80962080	chr10	80961961	80962080	*	0	0	-39.9113	S1pr4	1	1	0	467	803	NM_010102	-	TRUE	1	0	182.286	6
chr10.81036001.81036120	chr10	81036001	81036120	*	2.48823e-12	1.13464e-11	33.7679	NA	0	0	0	468	-1912	NM_001252401	+	FALSE	0	1	34	1
chr10.82159561.82159680	chr10	82159561	82159680	*	0	0	30.6585	NA	0	0	0	469	-2072	NM_001081218	+	FALSE	0	0	82.5714	1
chr10.82479721.82479840	chr10	82479721	82479840	*	0	0	26.1499	Chst11	0	0	1	470	31481	NM_021439	+	FALSE	0	0	118.143	6
chr10.82479841.82479960	chr10	82479841	82479960	*	0	0	35.8051	Chst11	0	0	1	471	31601	NM_021439	+	FALSE	0	0	54.1429	2
chr10.82482721.82482840	chr10	82482721	82482840	*	0	0	25.4326	Chst11	0	0	1	472	34481	NM_021439	+	FALSE	0	0	234.571	5
chr10.83008321.83008440	chr10	83008321	83008440	*	0	0	25.0849	A230046K03Rik	0	0	1	473	1637	NM_001033375	+	FALSE	0	1	160.429	1
chr10.83181961.83182080	chr10	83181961	83182080	*	0	0	-25.1861	NA	0	0	0	474	-3530	NM_001145198	+	FALSE	0	0	103.571	1
chr10.83400121.83400240	chr10	83400121	83400240	*	0	0	33.4763	NA	0	0	0	475	214513	NM_001145198	+	FALSE	0	0	112.143	2
chr10.83995201.83995320	chr10	83995201	83995320	*	0	0	27.1442	Ckap4	0	0	1	476	1314	NM_175451	-	FALSE	0	1	142.143	5
chr10.84012961.84013080	chr10	84012961	84013080	*	0	0	-26.8722	NA	0	0	1	477	3004	NR_040658	-	FALSE	0	0	350.857	3
chr10.84036361.84036480	chr10	84036361	84036480	*	3.66263e-13	1.83315e-12	-27.7357	NA	0	0	0	478	-3212	NM_146008	+	FALSE	0	0	61	1
chr10.84036721.84036840	chr10	84036721	84036840	*	7.0689e-12	3.06062e-11	-30.6018	NA	0	0	0	479	-2852	NM_146008	+	FALSE	0	0	41.8571	1
chr10.84273121.84273240	chr10	84273121	84273240	*	0	0	28.0516	Rfx4	0	0	1	480	-27653	NM_027689	+	FALSE	0	0	217	1
chr10.8482441.8482560	chr10	8482441	8482560	*	0	0	28.1986	Sash1	0	0	1	481	123309	NM_175155	-	FALSE	0	0	105.857	1
chr10.8485801.8485920	chr10	8485801	8485920	*	0	0	-27.2986	Sash1	0	0	1	482	119949	NM_175155	-	FALSE	0	0	266.429	5
chr10.85802281.85802400	chr10	85802281	85802400	*	6.66134e-16	4.39546e-15	32.135	c("Syn3", "Timp3")	0	0	1	483	39126	NM_011595	+	FALSE	0	0	41.8571	1
chr10.87275521.87275640	chr10	87275521	87275640	*	1.1674e-12	5.51877e-12	27.5351	NA	0	0	0	484	-46161	NM_010512	+	FALSE	0	0	54.5714	2
chr10.87837121.87837240	chr10	87837121	87837240	*	0	0	31.9854	NA	0	0	0	485	-4917	NM_001004164	+	FALSE	0	0	129.429	1
chr10.88175161.88175280	chr10	88175161	88175280	*	2.32043e-11	9.45568e-11	-25.2315	NA	0	0	0	486	18567	NM_001037166	-	FALSE	0	0	57.8571	2
chr10.88921561.88921680	chr10	88921561	88921680	*	0	0	27.328	Nr1h4	0	0	1	487	-14850	NM_001033331	-	FALSE	0	0	132.286	1
chr10.92574361.92574480	chr10	92574361	92574480	*	0	0	32.0535	NA	0	0	0	488	-49141	NM_146239	+	FALSE	0	0	68.5714	3
chr10.92606761.92606880	chr10	92606761	92606880	*	5.55112e-16	3.68631e-15	-26.4456	NA	0	0	0	489	-16741	NM_146239	+	FALSE	0	0	69.4286	3
chr10.92751121.92751240	chr10	92751121	92751240	*	0	0	26.2561	Elk3	0	0	1	490	22665	NM_013508	-	FALSE	0	0	79.1429	1
chr10.92751241.92751360	chr10	92751241	92751360	*	0	0	27.3554	Elk3	0	0	1	491	22545	NM_013508	-	FALSE	0	0	189.429	2
chr10.92754001.92754120	chr10	92754001	92754120	*	0	0	28.4373	Elk3	0	0	1	492	19785	NM_013508	-	FALSE	0	0	80.8571	2
chr10.92754121.92754240	chr10	92754121	92754240	*	0	0	30.1823	Elk3	0	0	1	493	19665	NM_013508	-	FALSE	0	0	76	2
chr10.92901241.92901360	chr10	92901241	92901360	*	0	0	-31.2822	NA	0	0	0	494	-14781	NM_008517	+	FALSE	0	0	81.2857	1
chr10.93003241.93003360	chr10	93003241	93003360	*	0	0	-27.9971	NA	1	0	0	495	-17	NM_175488	+	TRUE	0	1	167	6
chr10.93370321.93370440	chr10	93370321	93370440	*	1.4132e-12	6.61847e-12	26.3775	NA	0	0	0	496	-16375	NM_019648	-	FALSE	0	0	63.2857	2
chr10.93396841.93396960	chr10	93396841	93396960	*	0	0	36.7296	NA	0	0	0	497	29649	NR_029764	-	FALSE	0	0	178.714	6
chr10.93396961.93397080	chr10	93396961	93397080	*	0	0	35.5868	NA	0	0	0	498	29529	NR_029764	-	FALSE	0	0	43.5714	1
chr10.93592561.93592680	chr10	93592561	93592680	*	0	0	28.3089	Fgd6	0	0	1	499	-17996	NM_011629	+	FALSE	0	0	138.286	3
chr10.93796201.93796320	chr10	93796201	93796320	*	0	0	-30.8994	NA	0	0	0	500	-34754	NR_033209	-	FALSE	0	0	116.714	3
chr10.93819721.93819840	chr10	93819721	93819840	*	0	0	-26.7076	NA	0	0	0	501	-58274	NR_033209	-	FALSE	0	0	646	7
chr10.93819841.93819960	chr10	93819841	93819960	*	0	0	-26.6492	NA	0	0	0	502	-58394	NR_033209	-	FALSE	0	0	114.571	1
chr10.93984121.93984240	chr10	93984121	93984240	*	1.29011e-09	4.23668e-09	26.6822	Tmcc3	0	0	1	503	6521	NM_172051	+	FALSE	0	0	39.5714	1
chr10.94008721.94008840	chr10	94008721	94008840	*	0	0	26.7818	Tmcc3	0	0	1	504	-29162	NM_001168684	+	FALSE	0	0	92.7143	2
chr10.94016401.94016520	chr10	94016401	94016520	*	0	0	-32.6947	Tmcc3	0	0	1	505	-21482	NM_001168684	+	FALSE	0	0	383.857	5
chr10.94028641.94028760	chr10	94028641	94028760	*	7.21645e-15	4.30832e-14	29.673	Tmcc3	0	0	1	506	-9242	NM_001168684	+	FALSE	0	0	56.8571	1
chr10.94030921.94031040	chr10	94030921	94031040	*	0	0	30.9677	Tmcc3	0	0	1	507	-6962	NM_001168684	+	FALSE	0	0	117.571	4
chr10.94037521.94037640	chr10	94037521	94037640	*	0	0	36.1982	Tmcc3	1	0	1	508	-362	NM_001168684	+	TRUE	0	0	315	3
chr10.94037641.94037760	chr10	94037641	94037760	*	0	0	31.792	Tmcc3	1	0	1	509	-242	NM_001168684	+	TRUE	0	0	298.857	3
chr10.94037761.94037880	chr10	94037761	94037880	*	0	0	31.7965	Tmcc3	1	0	1	510	-122	NM_001168684	+	TRUE	0	0	241.429	3
chr10.94234441.94234560	chr10	94234441	94234560	*	0	0	29.5989	Ccdc41	0	0	1	511	82908	NM_029852	+	FALSE	0	0	172.143	2
chr10.94290961.94291080	chr10	94290961	94291080	*	0	0	-36.3069	Plxnc1	0	0	1	512	116133	NM_018797	-	FALSE	0	0	197.571	2
chr10.94291081.94291200	chr10	94291081	94291200	*	0	0	-37.9625	Plxnc1	0	0	1	513	116013	NM_018797	-	FALSE	0	0	106	1
chr10.94291201.94291320	chr10	94291201	94291320	*	0	0	-30.674	Plxnc1	0	0	1	514	115893	NM_018797	-	FALSE	0	0	390	4
chr10.94291321.94291440	chr10	94291321	94291440	*	0	0	-26.6198	Plxnc1	0	0	1	515	115773	NM_018797	-	FALSE	0	0	230	4
chr10.94291681.94291800	chr10	94291681	94291800	*	0	0	-32.9839	Plxnc1	0	0	1	516	115413	NM_018797	-	FALSE	0	0	55.7143	1
chr10.94291801.94291920	chr10	94291801	94291920	*	0	0	-31.2115	Plxnc1	0	0	1	517	115293	NM_018797	-	FALSE	0	0	89	1
chr10.94368481.94368600	chr10	94368481	94368600	*	0	0	30.2419	Plxnc1	0	0	1	518	38613	NM_018797	-	FALSE	0	0	169.714	6
chr10.94579561.94579680	chr10	94579561	94579680	*	0	0	29.137	NA	0	0	0	519	-172350	NM_018797	-	FALSE	0	0	132.857	3
chr10.94642801.94642920	chr10	94642801	94642920	*	0	0	-33.4622	Cradd	0	0	1	520	143812	NM_009950	-	FALSE	0	0	146.714	2
chr10.94698841.94698960	chr10	94698841	94698960	*	0	0	37.0828	Cradd	0	0	1	521	87772	NM_009950	-	FALSE	0	0	250.714	2
chr10.94717201.94717320	chr10	94717201	94717320	*	0	0	34.4344	Cradd	0	0	1	522	69412	NM_009950	-	FALSE	0	0	264.571	4
chr10.94717321.94717440	chr10	94717321	94717440	*	0	0	44.8788	Cradd	0	0	1	523	69292	NM_009950	-	FALSE	0	0	40.7143	2
chr10.9474841.9474960	chr10	9474841	9474960	*	0	0	27.9638	NA	0	0	0	524	70323	NR_038036	+	FALSE	0	0	97.5714	1
chr10.94780681.94780800	chr10	94780681	94780800	*	5.77316e-15	3.48072e-14	29.7683	Cradd	0	0	1	525	5932	NM_009950	-	FALSE	0	0	56.7143	3
chr10.94780801.94780920	chr10	94780801	94780920	*	4.9627e-14	2.72431e-13	30.0086	Cradd	0	0	1	526	5812	NM_009950	-	FALSE	0	0	53.1429	2
chr10.94781161.94781280	chr10	94781161	94781280	*	0	0	38.8888	Cradd	0	0	1	527	5452	NM_009950	-	FALSE	0	0	132.429	4
chr10.95018401.95018520	chr10	95018401	95018520	*	0	0	29.9459	Nudt4	0	0	1	528	3436	NR_037212	-	FALSE	0	0	105.429	3
chr10.95067481.95067600	chr10	95067481	95067600	*	0	0	-28.3797	NA	0	0	0	529	-40681	NM_027722	-	FALSE	0	0	97.4286	3
chr10.95086921.95087040	chr10	95086921	95087040	*	0	0	25.278	NA	0	0	0	530	-60121	NM_027722	-	FALSE	0	0	95.7143	2
chr10.95650921.95651040	chr10	95650921	95651040	*	0	0	34.832	NA	0	0	0	531	247626	NM_001001932	+	FALSE	0	0	450.714	4
chr10.95651161.95651280	chr10	95651161	95651280	*	0	0	26.2884	NA	0	0	0	532	247866	NM_001001932	+	FALSE	0	0	508.857	6
chr10.95942641.95942760	chr10	95942641	95942760	*	0	0	26.3295	NA	0	0	0	533	-136875	NM_007569	+	FALSE	0	0	90	2
chr10.96149521.96149640	chr10	96149521	96149640	*	0	0	28.7016	NA	0	0	0	534	69888	NM_007569	+	FALSE	0	0	64.5714	1
chr10.96149761.96149880	chr10	96149761	96149880	*	0	0	32.1947	NA	0	0	0	535	70128	NM_007569	+	FALSE	0	0	340.143	4
chr10.96183721.96183840	chr10	96183721	96183840	*	2.57394e-11	1.04302e-10	-25.5242	NA	0	0	0	536	104088	NM_007569	+	FALSE	0	0	49.8571	1
chr10.97030201.97030320	chr10	97030201	97030320	*	8.39059e-10	2.82548e-09	25.3026	Lum	0	0	1	537	2068	NM_008524	+	FALSE	0	0	44.8571	1
chr10.98006521.98006640	chr10	98006521	98006640	*	0	0	28.3015	NA	0	0	0	538	-192021	NR_045179	-	FALSE	0	0	213.429	2
chr10.98589721.98589840	chr10	98589721	98589840	*	0	0	-28.0339	Wdr51b	0	0	1	539	18954	NM_015737	+	FALSE	0	0	211.429	7
chr10.98589841.98589960	chr10	98589841	98589960	*	0	0	-29.0826	Wdr51b	0	0	1	540	19074	NM_015737	+	FALSE	0	0	187.857	2
chr10.98590201.98590320	chr10	98590201	98590320	*	0	0	-39.6853	Wdr51b	0	0	1	541	19434	NM_015737	+	FALSE	0	0	104.286	2
chr10.98671921.98672040	chr10	98671921	98672040	*	0	0	27.9754	NA	0	0	0	542	-53825	NM_026268	+	FALSE	0	0	95.8571	3
chr10.98672041.98672160	chr10	98672041	98672160	*	0	0	31.4406	NA	0	0	0	543	-53705	NM_026268	+	FALSE	0	0	56.4286	1
chr10.98672281.98672400	chr10	98672281	98672400	*	0	0	26.554	NA	0	0	0	544	-53465	NM_026268	+	FALSE	0	0	341	4
chr10.98747521.98747640	chr10	98747521	98747640	*	2.22045e-16	1.52189e-15	-30.0108	NA	0	0	0	545	21658	NM_026268	+	FALSE	0	0	50.4286	1
chr10.99501361.99501480	chr10	99501361	99501480	*	0	0	26.1451	Kitl	0	0	1	546	22905	NM_013598	+	FALSE	0	0	111.571	3
chr1.10030681.10030800	chr1	10030681	10030800	*	0	0	26.8541	Cspp1	0	0	1	547	2384	NM_026493	+	TRUE	0	1	95.2857	2
chr1.10315561.10315680	chr1	10315561	10315680	*	0	0	-32.2867	Cpa6	0	0	1	548	-92811	NM_001102430	-	FALSE	0	0	676.857	4
chr1.10315681.10315800	chr1	10315681	10315800	*	0	0	-35.9106	Cpa6	0	0	1	549	-92931	NM_001102430	-	FALSE	0	0	194.571	1
chr1.107822161.107822280	chr1	107822161	107822280	*	0	0	29.2008	NA	0	0	0	550	-64703	NM_001122675	+	FALSE	0	0	65.7143	1
chr1.107822401.107822520	chr1	107822401	107822520	*	0	0	33.5034	NA	0	0	0	551	-64463	NM_001122675	+	FALSE	0	0	44.8571	1
chr1.108005881.108006000	chr1	108005881	108006000	*	0	0	46.8055	NA	0	0	0	552	62102	NR_040630	-	FALSE	0	0	88.4286	2
chr1.108051961.108052080	chr1	108051961	108052080	*	0	0	27.0215	NA	0	0	1	553	16022	NR_040630	-	FALSE	0	0	217.143	3
chr1.108059401.108059520	chr1	108059401	108059520	*	0	0	-34.1925	NA	0	0	1	554	8582	NR_040630	-	FALSE	0	0	79.2857	1
chr1.108070681.108070800	chr1	108070681	108070800	*	0	0	34.3575	Phlpp1	0	0	1	555	2237	NM_133821	+	FALSE	0	1	218.286	1
chr1.108070801.108070920	chr1	108070801	108070920	*	0	0	37.721	Phlpp1	0	0	1	556	2357	NM_133821	+	FALSE	0	1	238.143	1
chr1.108439441.108439560	chr1	108439441	108439560	*	0	0	33.0695	Bcl2	0	1	0	557	171308	NM_009741	-	FALSE	0	0	170.429	2
chr1.108439561.108439680	chr1	108439561	108439680	*	0	0	33.7693	Bcl2	0	1	0	558	171188	NM_009741	-	FALSE	0	0	111.143	2
chr1.108441721.108441840	chr1	108441721	108441840	*	0	0	-28.3917	Bcl2	0	0	1	559	169028	NM_009741	-	FALSE	0	0	123.429	1
chr1.108478441.108478560	chr1	108478441	108478560	*	0	0	-31.9595	Bcl2	0	0	1	560	132308	NM_009741	-	FALSE	0	0	174.857	1
chr1.108509281.108509400	chr1	108509281	108509400	*	0	0	-25.7025	Bcl2	0	0	1	561	101468	NM_009741	-	FALSE	0	0	182.429	3
chr1.108606841.108606960	chr1	108606841	108606960	*	0	0	-32.7861	Bcl2	0	0	1	562	3908	NM_009741	-	FALSE	0	0	63.8571	1
chr1.108712081.108712200	chr1	108712081	108712200	*	0	0	-31.9243	NA	0	0	0	563	-18780	NM_009190	-	FALSE	0	0	88.2857	1
chr1.109532761.109532880	chr1	109532761	109532880	*	0	0	26.0053	NA	0	0	0	564	46180	NM_011459	+	FALSE	0	0	52.1429	1
chr11.100139161.100139280	chr11	100139161	100139280	*	6.55032e-15	3.92681e-14	30.8007	NA	0	0	0	565	-7977	NM_212483	-	FALSE	0	0	54	2
chr11.100237441.100237560	chr11	100237441	100237560	*	0	0	28.5901	Jup	0	0	1	566	-19987	NM_010404	-	FALSE	0	0	101.571	1
chr11.100249921.100250040	chr11	100249921	100250040	*	0	0	38.2925	Jup	0	0	1	567	9065	NM_010593	-	FALSE	0	0	86.8571	3
chr11.100252801.100252920	chr11	100252801	100252920	*	0	0	38.7442	Jup	0	0	1	568	6185	NM_010593	-	FALSE	0	0	68.4286	2
chr11.100257481.100257600	chr11	100257481	100257600	*	0	0	35.1184	Jup	0	0	1	569	1505	NM_010593	-	FALSE	0	1	100.714	3
chr11.100474681.100474800	chr11	100474681	100474800	*	0	0	28.4158	Dnajc7	0	0	1	570	6683	NM_019795	-	FALSE	0	0	64.8571	1
chr11.100562641.100562760	chr11	100562641	100562760	*	0	0	31.1097	Dhx58	0	1	1	571	2826	NM_030150	-	FALSE	0	0	375.429	8
chr11.100563481.100563600	chr11	100563481	100563600	*	6.10623e-15	3.67248e-14	26.1125	Dhx58	0	1	1	572	1986	NM_030150	-	FALSE	0	0	71.4286	3
chr11.100563721.100563840	chr11	100563721	100563840	*	0	0	25.9462	Dhx58	0	0	1	573	1746	NM_030150	-	FALSE	0	0	200.571	4
chr11.100566001.100566120	chr11	100566001	100566120	*	2.60125e-13	1.32251e-12	26.3512	Kat2a	1	1	0	574	-417	NM_030150	-	TRUE	0	0	64.7143	2
chr11.100667761.100667880	chr11	100667761	100667880	*	0	0	32.9988	Stat5b	0	0	1	575	16005	NM_011489	-	FALSE	0	0	71.1429	1
chr11.100667881.100668000	chr11	100667881	100668000	*	0	0	28.8775	Stat5b	0	0	1	576	15885	NM_011489	-	FALSE	0	0	163.857	5
chr11.100683241.100683360	chr11	100683241	100683360	*	0	0	-33.5075	Stat5b	1	0	1	577	525	NM_011489	-	TRUE	0	0	127.143	3
chr11.100683361.100683480	chr11	100683361	100683480	*	0	0	-26.3537	Stat5b	1	1	1	578	405	NM_011489	-	TRUE	0	0	354.571	3
chr11.100690801.100690920	chr11	100690801	100690920	*	0	0	33.474	Stat5b	0	0	1	579	-6918	NM_011489	-	FALSE	0	0	52.4286	1
chr11.100731841.100731960	chr11	100731841	100731960	*	0	0	27.5143	Stat5a	0	0	1	580	10045	NM_001164062	+	FALSE	0	0	289.714	3
chr11.100821481.100821600	chr11	100821481	100821600	*	0	0	26.9846	Ptrf	0	0	1	581	10332	NM_008986	-	FALSE	0	1	182.429	2
chr11.100822081.100822200	chr11	100822081	100822200	*	0	0	42.7608	Ptrf	0	0	1	582	9732	NM_008986	-	FALSE	0	1	42.5714	1
chr11.100823641.100823760	chr11	100823641	100823760	*	0	0	30.8383	Ptrf	0	0	1	583	8172	NM_008986	-	FALSE	0	0	189.286	1
chr11.100824001.100824120	chr11	100824001	100824120	*	0	0	32.9631	Ptrf	0	0	1	584	7812	NM_008986	-	FALSE	0	0	57.4286	1
chr11.100824121.100824240	chr11	100824121	100824240	*	0	0	28.9174	Ptrf	0	0	1	585	7692	NM_008986	-	FALSE	0	0	193.571	4
chr11.100991761.100991880	chr11	100991761	100991880	*	0	0	27.5667	NA	0	0	0	586	10318	NM_134024	+	FALSE	0	0	395.714	6
chr11.101091841.101091960	chr11	101091841	101091960	*	0	0	31.5571	NA	0	0	0	587	-4078	NM_007970	-	FALSE	0	0	178.429	2
chr11.101091961.101092080	chr11	101091961	101092080	*	0	0	26.9016	NA	0	0	0	588	-4198	NM_007970	-	FALSE	0	0	146	2
chr11.101106721.101106840	chr11	101106721	101106840	*	0	0	29.2563	NA	1	0	0	589	-808	NM_019444	+	TRUE	0	1	135.143	3
chr11.101184961.101185080	chr11	101184961	101185080	*	1.11022e-16	7.76597e-16	27.4108	NA	0	0	0	590	-1297	NM_178932	+	FALSE	0	0	65.4286	1
chr11.101210041.101210160	chr11	101210041	101210160	*	5.66214e-15	3.41649e-14	31.8976	NA	0	0	0	591	18123	NM_009675	+	FALSE	0	0	38.1429	1
chr11.101287561.101287680	chr11	101287561	101287680	*	0	0	25.6528	Rundc1	1	0	1	592	-915	NM_026865	-	TRUE	0	1	288.857	4
chr11.101342161.101342280	chr11	101342161	101342280	*	9.99201e-16	6.49239e-15	27.2451	NA	0	0	0	593	12511	NM_009708	+	FALSE	0	0	76.5714	1
chr11.101444041.101444160	chr11	101444041	101444160	*	0	0	31.0885	Tmem106a	1	0	1	594	487	NM_144830	+	TRUE	0	0	302.857	2
chr11.101529361.101529480	chr11	101529361	101529480	*	2.22045e-16	1.52189e-15	33.1741	NA	0	0	0	595	2508	NM_025404	+	FALSE	0	0	48.4286	1
chr11.101529481.101529600	chr11	101529481	101529600	*	0	0	38.4934	NA	0	0	0	596	2628	NM_025404	+	FALSE	0	0	177.857	5
chr11.101625121.101625240	chr11	101625121	101625240	*	0	0	28.0595	Dhx8	0	1	1	597	21385	NM_008815	-	FALSE	0	0	71	1
chr11.101742481.101742600	chr11	101742481	101742600	*	0	0	28.7531	Meox1	0	0	1	598	13069	NM_010791	-	FALSE	0	0	79	2
chr11.101742721.101742840	chr11	101742721	101742840	*	0	0	29.1966	Meox1	0	0	1	599	12829	NM_010791	-	FALSE	0	0	153.857	2
chr11.101836321.101836440	chr11	101836321	101836440	*	0	0	28.6903	Dusp3	0	0	1	600	-7993	NM_024449	-	FALSE	0	0	168.286	4
chr11.101853001.101853120	chr11	101853001	101853120	*	1.42331e-13	7.45449e-13	25.5138	1700006E09Rik	0	0	1	601	4633	NM_029287	+	FALSE	0	0	73.8571	2
chr11.102027721.102027840	chr11	102027721	102027840	*	6.27276e-14	3.40632e-13	27.5446	Lsm12	0	0	1	602	-10001	NM_029649	-	FALSE	0	0	60	1
chr11.102086161.102086280	chr11	102086161	102086280	*	1.44551e-13	7.56502e-13	25.2223	Hdac5	0	1	1	603	5207	NM_010412	-	FALSE	1	0	65.4286	8
chr11.102182281.102182400	chr11	102182281	102182400	*	0	0	27.1879	NA	0	0	0	604	-1872	NM_011551	-	FALSE	0	1	180.429	3
chr11.102294481.102294600	chr11	102294481	102294600	*	1.00142e-13	5.32666e-13	28.354	Grn	0	1	1	605	2847	NM_008175	+	FALSE	0	0	40	1
chr11.102306841.102306960	chr11	102306841	102306960	*	0	0	33.1694	Fam171a2	0	0	1	606	2018	NM_199200	-	FALSE	0	1	54.7143	1
chr11.102443281.102443400	chr11	102443281	102443400	*	3.30846e-14	1.84968e-13	25.0245	NA	0	0	0	607	-2849	NR_040286	-	FALSE	0	0	76.2857	1
chr11.102472321.102472440	chr11	102472321	102472440	*	0	0	25.1611	NA	0	0	0	608	6578	NM_020510	+	FALSE	0	0	347.714	7
chr11.102492121.102492240	chr11	102492121	102492240	*	0	0	44.2002	NA	0	0	0	609	-6392	NR_033474	-	FALSE	0	0	54.4286	2
chr11.102864601.102864720	chr11	102864601	102864720	*	3.93796e-13	1.96384e-12	26.3466	Dcakd	0	0	1	610	13742	NM_026551	-	FALSE	0	0	49	3
chr11.102928921.102929040	chr11	102928921	102929040	*	0	0	33.6492	NA	0	0	0	611	33933	NM_152813	-	FALSE	0	0	78.7143	2
chr11.102958801.102958920	chr11	102958801	102958920	*	0	0	35.2273	Plcd3	0	0	1	612	4053	NM_152813	-	FALSE	0	0	55.4286	3
chr11.102959041.102959160	chr11	102959041	102959160	*	0	0	32.8024	Plcd3	0	0	1	613	3813	NM_152813	-	FALSE	0	0	144.143	6
chr11.102972721.102972840	chr11	102972721	102972840	*	0	0	36.4167	Acbd4	0	0	1	614	-4799	NM_138753	+	FALSE	0	0	51.7143	1
chr11.102972841.102972960	chr11	102972841	102972960	*	0	0	26.4037	Acbd4	0	1	1	615	-4679	NM_138753	+	FALSE	0	0	282.714	7
chr11.102973081.102973200	chr11	102973081	102973200	*	0	0	26.8638	Acbd4	0	1	0	616	-4439	NM_138753	+	FALSE	0	0	97.1429	2
chr11.102981961.102982080	chr11	102981961	102982080	*	4.71327e-09	1.43745e-08	25.555	NA	0	0	0	617	4324	NM_138753	+	FALSE	0	0	37.1429	1
chr11.103019881.103020000	chr11	103019881	103020000	*	3.33067e-16	2.25203e-15	28.6954	NA	0	0	0	618	-12452	NM_019679	+	FALSE	0	0	66.5714	2
chr11.103033081.103033200	chr11	103033081	103033200	*	0	0	-35.2038	Fmnl1	1	0	1	619	631	NM_001077698	+	TRUE	0	1	117.429	4
chr11.103034881.103035000	chr11	103034881	103035000	*	0	0	-36.8855	Fmnl1	0	0	1	620	2431	NM_001077698	+	FALSE	0	0	77.8571	2
chr11.103036441.103036560	chr11	103036441	103036560	*	2.22045e-16	1.52189e-15	-27.9925	Fmnl1	0	0	1	621	3991	NM_001077698	+	FALSE	0	0	72.1429	4
chr11.103039081.103039200	chr11	103039081	103039200	*	0	0	-32.3481	Fmnl1	0	0	1	622	6631	NM_001077698	+	FALSE	0	0	221.286	4
chr11.103053841.103053960	chr11	103053841	103053960	*	0	0	34.4823	Fmnl1	0	0	1	623	15903	NM_001254724	-	TRUE	0	0	72.7143	7
chr11.103059721.103059840	chr11	103059721	103059840	*	0	0	25.3386	Fmnl1	0	1	1	624	10023	NM_001254724	-	FALSE	0	1	546.429	6
chr11.103059841.103059960	chr11	103059841	103059960	*	0	0	30.9328	Fmnl1	0	1	0	625	9903	NM_001254724	-	FALSE	0	1	267	6
chr11.103059961.103060080	chr11	103059961	103060080	*	0	0	36.9526	Fmnl1	0	1	0	626	9783	NM_001254724	-	FALSE	0	1	50.1429	5
chr11.103060561.103060680	chr11	103060561	103060680	*	0	0	28.3826	1700023F06Rik	0	1	1	627	9183	NM_001254724	-	FALSE	0	1	77	4
chr11.103085521.103085640	chr11	103085521	103085640	*	0	0	25.7518	Map3k14	0	1	1	628	-5776	NM_177801	-	FALSE	0	0	129.429	8
chr11.103126561.103126680	chr11	103126561	103126680	*	0	0	-33.339	Map3k14	0	0	1	629	2036	NM_016896	-	FALSE	0	1	149.857	4
chr11.103153801.103153920	chr11	103153801	103153920	*	0	0	26.2855	NA	0	0	0	630	-25087	NM_016896	-	FALSE	0	0	74.7143	2
chr11.103154041.103154160	chr11	103154041	103154160	*	0	0	25.6213	NA	0	0	0	631	-25327	NM_016896	-	FALSE	0	0	75.1429	2
chr11.103165921.103166040	chr11	103165921	103166040	*	0	0	-26.6622	NA	0	0	0	632	-37207	NM_016896	-	FALSE	0	0	380	6
chr11.103205641.103205760	chr11	103205641	103205760	*	0	0	-33.3546	Arhgap27	1	0	1	633	257	NM_133715	-	TRUE	0	0	292.429	3
chr11.103205761.103205880	chr11	103205761	103205880	*	0	0	-35.7894	Arhgap27	1	1	1	634	137	NM_133715	-	TRUE	0	0	420.143	5
chr11.103206001.103206120	chr11	103206001	103206120	*	1.83664e-12	8.48713e-12	-25.4901	c("Arhgap27", "F830206d12rik")	1	1	1	635	0	NM_133715	-	TRUE	0	0	65.4286	3
chr11.103207801.103207920	chr11	103207801	103207920	*	0	0	39.9917	F830206d12rik	0	0	1	636	1736	NR_045346	+	FALSE	0	0	63.5714	5
chr11.103267801.103267920	chr11	103267801	103267920	*	2.37214e-09	7.53213e-09	28.1353	Plekhm1	0	0	1	637	6059	NM_183034	-	FALSE	0	0	37.7143	1
chr11.103590481.103590600	chr11	103590481	103590600	*	0	0	36.1368	Wnt9b	0	1	0	638	20536	NM_011719	-	FALSE	0	0	84.1429	6
chr11.103829041.103829160	chr11	103829041	103829160	*	0	0	27.9267	Arf2	1	0	1	639	858	NM_007477	+	TRUE	0	1	119.571	1
chr11.103862641.103862760	chr11	103862641	103862760	*	0	0	-30.0689	NA	0	0	0	640	34458	NM_007477	+	FALSE	0	0	83.7143	2
chr11.104286481.104286600	chr11	104286481	104286600	*	1.11022e-16	7.76597e-16	-25.3321	1700081L11Rik	0	1	0	641	17006	NM_001081045	-	FALSE	0	0	86.1429	5
chr11.104486281.104486400	chr11	104486281	104486400	*	0	0	39.6035	Itgb3	0	0	1	642	16969	NM_016780	+	FALSE	0	0	39.4286	1
chr11.104487601.104487720	chr11	104487601	104487720	*	0	0	31.0992	Itgb3	0	0	1	643	18289	NM_016780	+	FALSE	0	0	117	1
chr11.104523001.104523120	chr11	104523001	104523120	*	0	0	-29.7839	Itgb3	0	0	1	644	53689	NM_016780	+	FALSE	0	0	53.2857	1
chr11.105193441.105193560	chr11	105193441	105193560	*	0	0	31.7348	Mrc2	0	1	1	645	39483	NM_008626	+	FALSE	0	0	75.1429	1
chr11.105796201.105796320	chr11	105796201	105796320	*	6.44129e-12	2.80159e-11	32.1521	Cyb561	0	1	0	646	9142	NM_007805	-	FALSE	0	0	40.1429	1
chr11.105806161.105806280	chr11	105806161	105806280	*	0	0	31.8096	NA	1	0	0	647	-701	NM_007805	-	TRUE	0	1	73	2
chr11.105807481.105807600	chr11	105807481	105807600	*	0	0	29.3392	NA	0	0	0	648	-2021	NM_007805	-	FALSE	0	1	71.7143	1
chr11.105807961.105808080	chr11	105807961	105808080	*	0	0	-29.6664	NA	0	0	0	649	-2501	NM_007805	-	FALSE	0	0	185.429	4
chr11.105808081.105808200	chr11	105808081	105808200	*	0	0	-25.7376	NA	0	0	0	650	-2621	NM_007805	-	FALSE	0	0	227.143	4
chr11.105817201.105817320	chr11	105817201	105817320	*	0	0	-32.8016	NA	0	0	0	651	-11741	NM_007805	-	FALSE	0	0	206.143	16
chr11.105918241.105918360	chr11	105918241	105918360	*	0	0	-25.2853	Dcaf7	0	1	0	652	-9061	NM_027346	+	FALSE	0	0	133	1
chr11.105918361.105918480	chr11	105918361	105918480	*	3.56382e-14	1.98665e-13	-25.3138	Dcaf7	0	1	0	653	-8941	NM_027346	+	FALSE	0	0	63	1
chr11.106063201.106063320	chr11	106063201	106063320	*	0	0	-31.0348	Ccdc47	0	0	1	654	-8285	NM_001252449	-	TRUE	0	0	189.286	2
chr11.106063321.106063440	chr11	106063321	106063440	*	0	0	-26.7043	Ccdc47	0	1	1	655	-8405	NM_001252449	-	TRUE	0	0	611.143	5
chr11.106136401.106136520	chr11	106136401	106136520	*	0	0	27.4342	NA	0	0	0	656	-1466	NM_029467	+	FALSE	0	1	259.286	4
chr11.106281001.106281120	chr11	106281001	106281120	*	1.11022e-16	7.76597e-16	-28.3886	Ern1	0	0	1	657	-37047	NM_010494	-	FALSE	0	0	72.4286	1
chr11.106343041.106343160	chr11	106343041	106343160	*	0	0	-26.203	Ern1	0	0	1	658	5951	NM_023913	-	FALSE	0	0	199.857	2
chr11.106343161.106343280	chr11	106343161	106343280	*	0	0	-27.0427	Ern1	0	0	1	659	5831	NM_023913	-	FALSE	0	0	102.286	1
chr11.106347601.106347720	chr11	106347601	106347720	*	0	0	-39.7049	Ern1	0	0	1	660	1391	NM_023913	-	FALSE	0	1	63.2857	1
chr11.106418041.106418160	chr11	106418041	106418160	*	0	0	-26.5986	Tex2	0	0	1	661	55738	NR_030703	+	FALSE	0	0	368.286	2
chr11.106441801.106441920	chr11	106441801	106441920	*	1.11022e-16	7.76597e-16	27.4275	Tex2	0	0	1	662	32325	NM_198292	-	FALSE	0	0	75	1
chr11.106441921.106442040	chr11	106441921	106442040	*	0	0	27.9705	Tex2	0	0	1	663	32205	NM_198292	-	FALSE	0	0	179.857	2
chr11.106442041.106442160	chr11	106442041	106442160	*	0	0	29.7892	Tex2	0	0	1	664	32085	NM_198292	-	FALSE	0	0	136.143	5
chr11.106459681.106459800	chr11	106459681	106459800	*	0	0	-33.0464	Tex2	0	0	1	665	14445	NM_198292	-	FALSE	0	0	56.8571	1
chr11.106480921.106481040	chr11	106480921	106481040	*	0	0	-36.8277	NA	0	0	0	666	-6678	NM_198292	-	FALSE	0	0	49.5714	4
chr11.106521001.106521120	chr11	106521001	106521120	*	0	0	29.8844	Pecam1	0	0	1	667	-46758	NM_198292	-	FALSE	0	0	193.571	2
chr11.106536841.106536960	chr11	106536841	106536960	*	0	0	30.3081	Pecam1	0	0	1	668	39636	NM_001032378	-	FALSE	0	0	338.571	4
chr11.106571281.106571400	chr11	106571281	106571400	*	0	0	26.135	Pecam1	0	0	1	669	5196	NM_001032378	-	FALSE	0	0	145.714	4
chr11.106612681.106612800	chr11	106612681	106612800	*	0	0	-27.763	Gm885	1	1	1	670	143	NR_073165	+	TRUE	0	0	206.286	3
chr11.106974601.106974720	chr11	106974601	106974720	*	0	0	26.6385	c("Bptf", "LOC100503350")	0	0	1	671	18517	NM_176850	-	FALSE	0	0	152.143	1
chr11.106974721.106974840	chr11	106974721	106974840	*	0	0	26.1718	c("Bptf", "LOC100503350")	0	0	1	672	18397	NM_176850	-	FALSE	0	0	188.571	2
chr11.107202841.107202960	chr11	107202841	107202960	*	0	0	29.6429	Pitpnc1	0	0	1	673	129075	NM_145823	-	FALSE	0	0	217.143	6
chr11.107209441.107209560	chr11	107209441	107209560	*	0	0	28.1384	Pitpnc1	0	0	1	674	122475	NM_145823	-	FALSE	0	0	77.1429	2
chr11.107209561.107209680	chr11	107209561	107209680	*	0	0	30.2738	Pitpnc1	0	0	1	675	122355	NM_145823	-	FALSE	0	0	126	6
chr11.107227441.107227560	chr11	107227441	107227560	*	0	0	25.5064	Pitpnc1	0	0	1	676	104475	NM_145823	-	FALSE	0	0	103	2
chr11.107227681.107227800	chr11	107227681	107227800	*	0	0	30.2236	Pitpnc1	0	0	1	677	104235	NM_145823	-	FALSE	0	0	82.1429	1
chr11.107228041.107228160	chr11	107228041	107228160	*	0	0	29.2455	Pitpnc1	0	0	1	678	103875	NM_145823	-	FALSE	0	0	181.857	3
chr11.107228161.107228280	chr11	107228161	107228280	*	0	0	27.6275	Pitpnc1	0	0	1	679	103755	NM_145823	-	FALSE	0	0	157	3
chr11.107239921.107240040	chr11	107239921	107240040	*	0	0	25.7822	Pitpnc1	0	0	1	680	91995	NM_145823	-	FALSE	0	0	88	6
chr11.107240881.107241000	chr11	107240881	107241000	*	0	0	32.1339	Pitpnc1	0	0	1	681	91035	NM_145823	-	FALSE	0	0	118	4
chr11.107241001.107241120	chr11	107241001	107241120	*	0	0	31.6079	Pitpnc1	0	0	1	682	90915	NM_145823	-	FALSE	0	0	338.429	7
chr11.107241241.107241360	chr11	107241241	107241360	*	0	0	32.1648	Pitpnc1	0	0	1	683	90675	NM_145823	-	FALSE	0	0	374	2
chr11.107241481.107241600	chr11	107241481	107241600	*	0	0	32.2364	Pitpnc1	0	0	1	684	90435	NM_145823	-	FALSE	0	0	386.143	6
chr11.107245441.107245560	chr11	107245441	107245560	*	0	0	31.1975	Pitpnc1	0	0	1	685	86475	NM_145823	-	FALSE	0	0	160.429	2
chr11.107277841.107277960	chr11	107277841	107277960	*	0	0	27.4939	Pitpnc1	0	0	1	686	54075	NM_145823	-	FALSE	0	0	102.571	2
chr11.107554681.107554800	chr11	107554681	107554800	*	0	0	-26.4674	NA	0	0	0	687	22991	NM_007582	-	FALSE	0	0	283.857	2
chr11.107554801.107554920	chr11	107554801	107554920	*	0	0	-30.9789	NA	0	0	0	688	22871	NM_007582	-	FALSE	0	0	353.429	2
chr11.107564761.107564880	chr11	107564761	107564880	*	6.66134e-15	3.9909e-14	29.1236	Cacng1	0	1	0	689	12911	NM_007582	-	FALSE	0	0	62	3
chr11.107581801.107581920	chr11	107581801	107581920	*	0	0	-31.873	NA	0	0	0	690	-4012	NM_007582	-	FALSE	0	0	54.1429	1
chr11.107604721.107604840	chr11	107604721	107604840	*	0	0	30.3836	Cacng4	0	0	1	691	-26932	NM_007582	-	FALSE	0	0	91.4286	2
chr11.108110641.108110760	chr11	108110641	108110760	*	0	0	-27.6049	Prkca	0	0	1	692	94443	NM_011101	-	FALSE	0	0	236.429	3
chr11.108778921.108779040	chr11	108778921	108779040	*	0	0	26.6085	NA	0	0	0	693	-2623	NM_015732	+	FALSE	0	0	177.714	2
chr11.109215121.109215240	chr11	109215121	109215240	*	0	0	34.5322	NA	0	0	0	694	6942	NR_027883	+	FALSE	0	0	76.1429	3
chr11.109238161.109238280	chr11	109238161	109238280	*	0	0	30.7216	Gna13	0	0	1	695	-13194	NR_038097	-	FALSE	0	0	127.429	1
chr11.109331641.109331760	chr11	109331641	109331760	*	0	0	-31.1056	Slc16a6	0	0	1	696	2784	NM_134038	-	FALSE	0	1	373	4
chr11.109357201.109357320	chr11	109357201	109357320	*	0	0	-27.281	Arsg	0	0	1	697	-22292	NM_001029842	-	FALSE	0	0	99.4286	2
chr11.109358641.109358760	chr11	109358641	109358760	*	1.11022e-16	7.76597e-16	-27.2543	Arsg	0	0	1	698	-23732	NM_001029842	-	FALSE	0	0	77.4286	2
chr11.109471561.109471680	chr11	109471561	109471680	*	8.56941e-10	2.882e-09	25.236	Wipi1	0	0	1	699	1024	NM_145940	-	FALSE	0	1	39.2857	1
chr11.109477921.109478040	chr11	109477921	109478040	*	0	0	28.1458	NA	0	0	0	700	-5219	NM_145940	-	FALSE	0	0	185.857	3
chr11.109478281.109478400	chr11	109478281	109478400	*	1.75415e-13	9.09821e-13	31.0547	NA	0	0	0	701	-5579	NM_145940	-	FALSE	0	0	42.5714	1
chr11.109567441.109567560	chr11	109567441	109567560	*	0	0	25.6035	Fam20a	0	0	1	702	16011	NM_153782	-	FALSE	0	0	195.714	2
chr11.109581841.109581960	chr11	109581841	109581960	*	0	0	25.0125	Fam20a	0	0	1	703	1611	NM_153782	-	FALSE	0	1	181	2
chr11.109582321.109582440	chr11	109582321	109582440	*	0	0	30.7854	Fam20a	0	0	1	704	1131	NM_153782	-	FALSE	0	1	154	4
chr11.109582441.109582560	chr11	109582441	109582560	*	0	0	32.9363	Fam20a	0	0	1	705	1011	NM_153782	-	FALSE	0	1	70.5714	3
chr11.109736521.109736640	chr11	109736521	109736640	*	0	0	35.5717	NA	0	0	0	706	29331	NR_045909	+	FALSE	0	0	195.429	2
chr11.109737001.109737120	chr11	109737001	109737120	*	4.4032e-11	1.73678e-10	27.237	NA	0	0	0	707	29811	NR_045909	+	FALSE	0	0	50	1
chr11.110310361.110310480	chr11	110310361	110310480	*	0	0	34.5936	Map2k6	0	0	1	708	49927	NM_011943	+	FALSE	0	0	90.4286	4
chr11.110310601.110310720	chr11	110310601	110310720	*	0	0	34.2591	Map2k6	0	0	1	709	50167	NM_011943	+	FALSE	0	0	74.2857	3
chr11.111549841.111549960	chr11	111549841	111549960	*	2.22045e-16	1.52189e-15	25.2309	NA	0	0	0	710	622365	NM_008425	+	FALSE	0	0	99.2857	2
chr11.112058881.112059000	chr11	112058881	112059000	*	2.36555e-12	1.08088e-11	28.4276	NA	0	0	0	711	513671	NR_024085	-	FALSE	0	0	52.8571	2
chr11.113055601.113055720	chr11	113055601	113055720	*	0	0	-28.5045	2610035D17Rik	0	0	1	712	7433	NR_015556	-	FALSE	0	0	114.857	3
chr11.113592361.113592480	chr11	113592361	113592480	*	0	0	29.3848	Cdc42ep4	0	0	1	713	19995	NM_020006	-	FALSE	0	0	82.4286	1
chr11.113595601.113595720	chr11	113595601	113595720	*	0	0	45.3303	Cdc42ep4	0	0	1	714	16755	NM_020006	-	FALSE	0	0	49.8571	1
chr11.113610241.113610360	chr11	113610241	113610360	*	0	0	35.0804	Cdc42ep4	0	0	1	715	2115	NM_020006	-	FALSE	0	1	52	5
chr11.113610721.113610840	chr11	113610721	113610840	*	0	0	33.8786	Cdc42ep4	0	0	1	716	1635	NM_020006	-	FALSE	0	1	107.857	5
chr11.113610961.113611080	chr11	113610961	113611080	*	0	0	28.0409	Cdc42ep4	0	0	1	717	1395	NM_020006	-	FALSE	0	1	176.571	5
chr11.113622961.113623080	chr11	113622961	113623080	*	0	0	-28.3482	NA	0	0	0	718	-9833	NM_001163346	-	FALSE	0	0	98.4286	2
chr11.113667481.113667600	chr11	113667481	113667600	*	0	0	-27.7026	Sdk2	0	1	1	719	-54353	NM_001163346	-	FALSE	0	0	78	4
chr11.114237361.114237480	chr11	114237361	114237480	*	0	0	26.6367	NA	0	0	0	720	72695	NR_027643	-	FALSE	0	0	162.429	2
chr11.11428681.11428800	chr11	11428681	11428800	*	0	0	-29.1739	NA	0	0	0	721	39414	NM_028669	+	FALSE	0	0	326.857	3
chr11.11464321.11464440	chr11	11464321	11464440	*	1.11022e-16	7.76597e-16	-30.1592	NA	0	0	0	722	75054	NM_028669	+	FALSE	0	0	65.1429	1
chr11.11464801.11464920	chr11	11464801	11464920	*	0	0	-27.2317	NA	0	0	0	723	75534	NM_028669	+	FALSE	0	0	110.429	2
chr11.11465401.11465520	chr11	11465401	11465520	*	0	0	-35.9903	NA	0	0	0	724	76134	NM_028669	+	FALSE	0	0	41.4286	1
chr11.114684121.114684240	chr11	114684121	114684240	*	0	0	37.9323	NA	0	0	0	725	23885	NM_181749	+	FALSE	0	0	178.857	3
chr11.114684241.114684360	chr11	114684241	114684360	*	0	0	35.7356	NA	0	0	0	726	24005	NM_181749	+	FALSE	0	0	168.571	4
chr11.114691801.114691920	chr11	114691801	114691920	*	0	0	34.2105	NA	0	0	0	727	-20926	NM_001110337	+	FALSE	0	0	72.2857	3
chr11.114691921.114692040	chr11	114691921	114692040	*	0	0	30.1453	NA	0	0	0	728	-20806	NM_001110337	+	FALSE	0	0	128.143	2
chr11.114698401.114698520	chr11	114698401	114698520	*	0	0	26.7025	NA	0	0	0	729	-14326	NM_001110337	+	FALSE	0	0	121.429	2
chr11.114736561.114736680	chr11	114736561	114736680	*	6.66134e-16	4.39546e-15	31.4734	NA	0	0	0	730	-14675	NM_170758	+	FALSE	0	0	54.7143	2
chr11.115013761.115013880	chr11	115013761	115013880	*	0	0	26.3999	Rab37	0	0	1	731	-1612	NM_021411	+	FALSE	0	1	300.857	4
chr11.115023001.115023120	chr11	115023001	115023120	*	0	0	-31.1557	Rab37	0	1	0	732	-1535	NM_012030	+	FALSE	0	1	205.429	4
chr11.115047601.115047720	chr11	115047601	115047720	*	0	0	28.8098	Nat9	1	0	1	733	911	NM_025400	-	TRUE	0	1	177.286	3
chr11.115047841.115047960	chr11	115047841	115047960	*	1.27232e-13	6.69531e-13	26.6254	Nat9	1	0	1	734	671	NM_025400	-	TRUE	0	1	69.1429	1
chr11.115221001.115221120	chr11	115221001	115221120	*	0	0	27.9104	C630004H02Rik	0	1	1	735	7914	NM_175454	-	FALSE	0	0	80.2857	6
chr11.115245241.115245360	chr11	115245241	115245360	*	3.26308e-09	1.01673e-08	26.2783	Cdr2l	0	0	1	736	2013	NM_001080929	+	FALSE	0	1	41.1429	1
chr11.115245961.115246080	chr11	115245961	115246080	*	0	0	31.9054	Cdr2l	0	0	1	737	2733	NM_001080929	+	FALSE	0	0	54.5714	2
chr11.115269601.115269720	chr11	115269601	115269720	*	0	0	-31.8116	Ict1	0	0	1	738	4523	NM_026729	+	FALSE	0	0	72.7143	1
chr11.115338721.115338840	chr11	115338721	115338840	*	0	0	-35.2716	Armc7	0	0	1	739	1732	NM_177778	+	FALSE	0	1	54.1429	1
chr11.115371001.115371120	chr11	115371001	115371120	*	0	0	35.0649	Hn1	0	0	1	740	4565	NM_008258	-	FALSE	0	0	92.2857	1
chr11.115371481.115371600	chr11	115371481	115371600	*	0	0	34.5559	Hn1	0	0	1	741	4085	NM_008258	-	FALSE	0	0	169.857	3
chr11.115462681.115462800	chr11	115462681	115462800	*	1.09525e-06	2.36875e-06	-25.9647	Gga3	0	0	1	742	2431	NM_001252067	-	FALSE	0	0	30.4286	1
chr11.115508761.115508880	chr11	115508761	115508880	*	0	0	27.7507	Grb2	0	0	1	743	-19153	NM_001252384	-	FALSE	0	0	105.857	5
chr11.115547881.115548000	chr11	115547881	115548000	*	0	0	27.1931	Grb2	0	0	1	744	21912	NM_008163	-	FALSE	0	0	122.857	2
chr11.11557081.11557200	chr11	11557081	11557200	*	0	0	-27.0125	NA	0	0	0	745	-29016	NM_009578	+	FALSE	0	0	414.571	3
chr11.115578961.115579080	chr11	115578961	115579080	*	8.88178e-16	5.7972e-15	-26.1639	NA	0	0	0	746	-9051	NM_008163	-	FALSE	0	0	68.5714	2
chr11.115584241.115584360	chr11	115584241	115584360	*	0	0	26.8396	NA	0	0	0	747	-14331	NM_008163	-	FALSE	0	0	488.714	5
chr11.115595641.115595760	chr11	115595641	115595760	*	0	0	27.6602	NA	0	0	0	748	-25731	NM_008163	-	FALSE	0	0	102.571	1
chr11.115637041.115637160	chr11	115637041	115637160	*	0	0	28.738	2310067B10Rik	0	0	1	749	10296	NM_028014	+	FALSE	0	0	129.286	2
chr11.115637281.115637400	chr11	115637281	115637400	*	5.52891e-14	3.01972e-13	27.7807	2310067B10Rik	0	0	1	750	10536	NM_028014	+	FALSE	0	0	60.7143	2
chr11.115637641.115637760	chr11	115637641	115637760	*	8.88178e-16	5.7972e-15	30.3885	2310067B10Rik	0	0	1	751	10896	NM_028014	+	FALSE	0	0	57.4286	2
chr11.115760041.115760160	chr11	115760041	115760160	*	0	0	-35.0271	Recql5	0	0	1	752	-1293	NM_183259	+	FALSE	0	0	142.857	3
chr11.115760161.115760280	chr11	115760161	115760280	*	0	0	-30.0113	Recql5	0	0	1	753	-1173	NM_183259	+	FALSE	0	0	79.4286	1
chr11.115761721.115761840	chr11	115761721	115761840	*	0	0	29.2445	c("Recql5", "2210020M01Rik")	1	0	1	754	270	NM_183259	+	TRUE	0	0	84.2857	3
chr11.11587201.11587320	chr11	11587201	11587320	*	0	0	-31.744	Ikzf1	1	0	1	755	987	NM_001025597	+	TRUE	0	1	56.8571	1
chr11.11587681.11587800	chr11	11587681	11587800	*	0	0	-25.3868	Ikzf1	0	0	1	756	1467	NM_001025597	+	FALSE	0	1	381	3
chr11.11587801.11587920	chr11	11587801	11587920	*	0	0	-26.7068	Ikzf1	0	0	1	757	1587	NM_001025597	+	FALSE	0	1	319.857	2
chr11.11587921.11588040	chr11	11587921	11588040	*	0	0	-32.2052	Ikzf1	0	0	1	758	1707	NM_001025597	+	FALSE	0	1	471.714	3
chr11.11588161.11588280	chr11	11588161	11588280	*	0	0	-36.0038	Ikzf1	0	0	1	759	1947	NM_001025597	+	FALSE	0	1	278.286	2
chr11.11588881.11589000	chr11	11588881	11589000	*	0	0	-30.1665	Ikzf1	0	0	1	760	2667	NM_001025597	+	FALSE	0	0	149.429	1
chr11.11589001.11589120	chr11	11589001	11589120	*	0	0	-31.8864	Ikzf1	0	0	1	761	2787	NM_001025597	+	FALSE	0	0	95.2857	1
chr11.11591521.11591640	chr11	11591521	11591640	*	0	0	-39.58	Ikzf1	0	0	1	762	5307	NM_001025597	+	FALSE	0	0	202	5
chr11.11591641.11591760	chr11	11591641	11591760	*	0	0	-29.0257	Ikzf1	0	0	1	763	5427	NM_001025597	+	FALSE	0	0	123	2
chr11.11591761.11591880	chr11	11591761	11591880	*	0	0	-30.3134	Ikzf1	0	0	1	764	5547	NM_001025597	+	FALSE	0	0	300.429	3
chr11.11592841.11592960	chr11	11592841	11592960	*	0	0	-31.3856	Ikzf1	0	0	1	765	6627	NM_001025597	+	FALSE	0	0	97.2857	1
chr11.11592961.11593080	chr11	11592961	11593080	*	0	0	-26.701	Ikzf1	0	0	1	766	6747	NM_001025597	+	FALSE	0	0	440.714	3
chr11.11593081.11593200	chr11	11593081	11593200	*	0	0	-41.9414	Ikzf1	0	0	1	767	6867	NM_001025597	+	FALSE	0	0	36.5714	1
chr11.115938121.115938240	chr11	115938121	115938240	*	0	0	-28.0941	Unc13d	0	0	1	768	1036	NM_001009573	-	TRUE	0	0	106.286	4
chr11.115938361.115938480	chr11	115938361	115938480	*	0	0	-35.994	Unc13d	1	0	1	769	796	NM_001009573	-	TRUE	0	0	80.1429	3
chr11.115938721.115938840	chr11	115938721	115938840	*	0	0	-34.9439	Unc13d	1	1	1	770	436	NM_001009573	-	TRUE	0	0	107.857	4
chr11.115938841.115938960	chr11	115938841	115938960	*	0	0	-32.9442	Unc13d	1	1	0	771	316	NM_001009573	-	TRUE	0	0	72.7143	6
chr11.116049001.116049120	chr11	116049001	116049120	*	0	0	28.4473	Acox1	0	0	1	772	-11049	NM_027107	+	FALSE	0	0	97.1429	3
chr11.116083681.116083800	chr11	116083681	116083800	*	0	0	29.2171	Evpl	0	1	0	773	6367	NR_004853	+	FALSE	1	0	229	7
chr11.116103241.116103360	chr11	116103241	116103360	*	0	0	25.5704	NA	0	0	0	774	-3837	NM_025276	-	FALSE	0	0	245	5
chr11.116116201.116116320	chr11	116116201	116116320	*	0	0	-32.4912	Srp68	0	0	1	775	-16797	NM_025276	-	FALSE	0	0	136.286	2
chr11.116127001.116127120	chr11	116127001	116127120	*	0	0	-36.1911	Srp68	0	0	1	776	8412	NM_146032	-	FALSE	0	0	74.1429	1
chr11.116155681.116155800	chr11	116155681	116155800	*	3.04201e-14	1.70717e-13	29.8339	Exoc7	0	1	1	777	12253	NM_016857	-	FALSE	0	0	63.5714	1
chr11.11626321.11626440	chr11	11626321	11626440	*	0	0	-27.9887	Ikzf1	0	0	1	778	40107	NM_001025597	+	FALSE	0	0	163.857	2
chr11.116267761.116267880	chr11	116267761	116267880	*	0	0	-32.1509	Rnf157	0	0	1	779	6467	NM_027258	-	FALSE	0	0	126.714	5
chr11.116292481.116292600	chr11	116292481	116292600	*	0	0	30.5468	NA	0	0	0	780	-2808	NM_176902	+	FALSE	0	0	137.857	2
chr11.116308081.116308200	chr11	116308081	116308200	*	1.45439e-14	8.42494e-14	25.5465	Qrich2	0	1	0	781	7462	NM_001033267	-	FALSE	0	0	78	1
chr11.116355841.116355960	chr11	116355841	116355960	*	0	0	33.7904	NA	0	0	0	782	-4182	NM_026364	-	FALSE	0	0	59.2857	3
chr11.116356081.116356200	chr11	116356081	116356200	*	0	0	26.6881	NA	0	0	0	783	-4422	NM_026364	-	FALSE	0	0	196.286	3
chr11.116519641.116519760	chr11	116519641	116519760	*	1.14083e-10	4.2765e-10	25.3067	Gm11744	0	0	1	784	1221	NM_001163318	+	FALSE	0	0	53.7143	2
chr11.116556961.116557080	chr11	116556961	116557080	*	0	0	30.2755	NA	1	0	0	785	-988	NM_009180	-	TRUE	0	1	217.571	3
chr11.116681281.116681400	chr11	116681281	116681400	*	9.85989e-13	4.69704e-12	32.4547	Mxra7	0	0	1	786	7961	NM_026280	-	FALSE	0	0	38.5714	1
chr11.116945041.116945160	chr11	116945041	116945160	*	0	0	29.5384	NA	0	0	0	787	6946	NR_027059	+	FALSE	0	0	87.7143	3
chr11.116951041.116951160	chr11	116951041	116951160	*	0	0	31.4828	NA	0	0	0	788	12946	NR_027059	+	FALSE	0	0	68.7143	2
chr11.116953081.116953200	chr11	116953081	116953200	*	0	0	33.1287	NA	0	0	0	789	14986	NR_027059	+	FALSE	0	0	72.2857	4
chr11.116969881.116970000	chr11	116969881	116970000	*	0	0	32.0931	NA	0	0	0	790	-6486	NM_001166506	+	FALSE	0	0	201.571	4
chr11.116970001.116970120	chr11	116970001	116970120	*	0	0	38.7245	NA	0	0	0	791	-6366	NM_001166506	+	FALSE	0	0	111.429	2
chr11.116974921.116975040	chr11	116974921	116975040	*	0	0	29.4246	NA	0	0	0	792	-1446	NM_001166506	+	FALSE	0	1	77.8571	2
chr11.116977801.116977920	chr11	116977801	116977920	*	0	0	29.6148	Sec14l1	0	0	1	793	1317	NM_028777	+	FALSE	0	1	371.429	5
chr11.116977921.116978040	chr11	116977921	116978040	*	0	0	27.5851	Sec14l1	0	0	1	794	1437	NM_028777	+	FALSE	0	1	183.714	2
chr11.116978041.116978160	chr11	116978041	116978160	*	0	0	33.6173	Sec14l1	0	0	1	795	1557	NM_028777	+	FALSE	0	1	262.143	2
chr11.116978641.116978760	chr11	116978641	116978760	*	0	0	28.0622	Sec14l1	0	0	1	796	2157	NM_028777	+	FALSE	0	1	399.286	6
chr11.116978761.116978880	chr11	116978761	116978880	*	0	0	33.8606	Sec14l1	0	0	1	797	2277	NM_028777	+	FALSE	0	1	300.429	7
chr11.116979121.116979240	chr11	116979121	116979240	*	0	0	31.9043	Sec14l1	0	0	1	798	2637	NM_028777	+	FALSE	0	1	261.714	4
chr11.117103561.117103680	chr11	117103561	117103680	*	0	0	-25.2668	2014-09-09	0	0	1	799	-23880	NM_001113487	+	FALSE	0	0	236.857	4
chr11.117174241.117174360	chr11	117174241	117174360	*	0	0	28.0698	2014-09-09	0	0	1	800	-18669	NM_017380	+	FALSE	0	0	100	2
chr11.117202801.117202920	chr11	117202801	117202920	*	0	0	32.5643	2014-09-09	0	0	1	801	9176	NM_001113488	+	FALSE	0	0	149.429	4
chr11.117384361.117384480	chr11	117384361	117384480	*	2.67564e-14	1.51056e-13	27.1764	NA	0	0	0	802	-88081	NR_015489	+	FALSE	0	0	64.8571	3
chr11.117384481.117384600	chr11	117384481	117384600	*	0	0	32.52	NA	0	0	0	803	-87961	NR_015489	+	FALSE	0	0	76.7143	3
chr11.117384721.117384840	chr11	117384721	117384840	*	0	0	34.2827	NA	0	0	0	804	-87721	NR_015489	+	FALSE	0	0	69.5714	3
chr11.117459481.117459600	chr11	117459481	117459600	*	0	0	26.4235	NA	0	0	0	805	-12961	NR_015489	+	FALSE	0	0	117.571	2
chr11.117472921.117473040	chr11	117472921	117473040	*	1.02301e-10	3.85568e-10	26.9939	2900041M22Rik	1	0	1	806	362	NR_015489	+	TRUE	0	0	51.5714	1
chr11.11755441.11755560	chr11	11755441	11755560	*	0	0	34.3087	Ddc	0	0	1	807	-12566	NR_045178	+	FALSE	0	0	98	2
chr11.117655681.117655800	chr11	117655681	117655800	*	0	0	-31.5122	NA	0	0	0	808	-3174	NM_029964	+	FALSE	0	0	56.2857	1
chr11.117733201.117733320	chr11	117733201	117733320	*	0	0	-33.1262	c("Tha1", "LOC100503754")	0	0	1	809	1521	NM_027919	-	FALSE	0	1	122.286	3
chr11.117733321.117733440	chr11	117733321	117733440	*	0	0	-30.6391	c("Tha1", "LOC100503754")	0	0	1	810	1401	NM_027919	-	FALSE	0	1	107.857	3
chr11.117733441.117733560	chr11	117733441	117733560	*	6.66134e-16	4.39546e-15	-27.5272	c("Tha1", "LOC100503754")	0	0	1	811	1281	NM_027919	-	FALSE	0	1	74.2857	3
chr11.117750361.117750480	chr11	117750361	117750480	*	0	0	32.392	NA	0	0	0	812	-15522	NM_027919	-	FALSE	0	0	70.2857	5
chr11.117823321.117823440	chr11	117823321	117823440	*	2.15405e-12	9.88141e-12	29.6611	NA	0	0	0	813	7241	NM_007707	-	FALSE	0	1	42.8571	2
chr11.117824161.117824280	chr11	117824161	117824280	*	0	0	27.912	NA	0	0	0	814	6401	NM_007707	-	FALSE	0	1	292	3
chr11.117824281.117824400	chr11	117824281	117824400	*	0	0	27.1532	NA	0	0	0	815	6281	NM_007707	-	FALSE	0	1	95.7143	2
chr11.117836761.117836880	chr11	117836761	117836880	*	0	0	27.7531	NA	0	0	0	816	-6082	NM_007707	-	FALSE	0	0	102.429	5
chr11.118002481.118002600	chr11	118002481	118002600	*	0	0	30.0173	NA	0	0	0	817	-11949	NM_001167746	-	FALSE	0	0	91.1429	1
chr11.118081801.118081920	chr11	118081801	118081920	*	0	0	28.3892	Cyth1	0	0	1	818	-7746	NM_001112700	-	FALSE	0	0	97.2857	1
chr11.118102321.118102440	chr11	118102321	118102440	*	0	0	-28.1416	Cyth1	0	0	1	819	7467	NM_011180	-	FALSE	0	0	71.8571	2
chr11.118106641.118106760	chr11	118106641	118106760	*	0	0	-31.8328	Cyth1	0	0	1	820	3147	NM_011180	-	FALSE	0	0	92.4286	1
chr11.118188361.118188480	chr11	118188361	118188480	*	7.37288e-12	3.18491e-11	27.1097	Timp2	0	0	1	821	15369	NM_021440	-	FALSE	0	0	54.8571	1
chr11.118240681.118240800	chr11	118240681	118240800	*	0	0	28.1623	NA	0	0	0	822	22446	NM_011150	-	FALSE	0	0	72.5714	3
chr11.118294801.118294920	chr11	118294801	118294920	*	0	0	25.4781	NA	1	0	1	823	-195	NM_019959	+	TRUE	0	0	130.571	4
chr11.118898761.118898880	chr11	118898761	118898880	*	0	0	26.999	NA	0	0	0	824	3348	NM_013926	-	FALSE	1	0	268.857	6
chr11.118944481.118944600	chr11	118944481	118944600	*	6.66134e-16	4.39546e-15	-25.9331	Cbx4	0	0	1	825	2952	NM_007625	-	TRUE	0	1	79.4286	4
chr11.11925961.11926080	chr11	11925961	11926080	*	0	0	-43.5366	Grb10	0	0	1	826	1895	NM_001177629	-	TRUE	1	0	85.8571	12
chr11.11926081.11926200	chr11	11926081	11926200	*	0	0	-25.906	Grb10	0	0	1	827	1775	NM_001177629	-	TRUE	1	0	279.429	13
chr11.119447041.119447160	chr11	119447041	119447160	*	1.11799e-13	5.9151e-13	32.3201	NA	0	0	0	828	-17149	NM_028898	+	FALSE	0	0	45.7143	3
chr11.119450641.119450760	chr11	119450641	119450760	*	2.77556e-14	1.56432e-13	-25.3687	NA	0	0	0	829	-13549	NM_028898	+	FALSE	0	0	77.1429	3
chr11.119518921.119519040	chr11	119518921	119519040	*	1.88738e-15	1.19405e-14	27.2728	Rptor	0	1	1	830	54614	NM_028898	+	FALSE	0	0	78.4286	2
chr11.119532361.119532480	chr11	119532361	119532480	*	0	0	-38.5071	Rptor	0	0	1	831	68054	NM_028898	+	FALSE	0	0	104.714	4
chr11.119546761.119546880	chr11	119546761	119546880	*	0	0	26.9078	Rptor	0	0	1	832	82454	NM_028898	+	FALSE	0	0	112.286	1
chr11.119778001.119778120	chr11	119778001	119778120	*	0	0	39.7334	Chmp6	0	1	1	833	2879	NM_001085498	+	FALSE	0	0	52.8571	2
chr11.119778121.119778240	chr11	119778121	119778240	*	0	0	26.3929	Chmp6	0	0	1	834	2999	NM_001085498	+	FALSE	0	0	168.429	5
chr11.119790001.119790120	chr11	119790001	119790120	*	0	0	-36.5939	NA	0	0	0	835	-14286	NM_001037754	+	FALSE	0	0	133.857	4
chr11.119891161.119891280	chr11	119891161	119891280	*	0	0	35.2168	Aatk	0	0	1	836	11816	NM_001198787	-	FALSE	0	0	134.286	3
chr11.119907241.119907360	chr11	119907241	119907360	*	0	0	29.8991	Aatk	0	0	1	837	1100	NM_001198785	-	FALSE	0	1	70.2857	2
chr11.119999161.119999280	chr11	119999161	119999280	*	0	0	31.5092	Slc38a10	0	1	1	838	13386	NM_001164799	-	FALSE	0	0	96.5714	4
chr11.120046321.120046440	chr11	120046321	120046440	*	0	0	28.0464	NA	0	0	0	839	4731	NR_030682	-	FALSE	0	1	70.1429	3
chr11.120046561.120046680	chr11	120046561	120046680	*	0	0	36.2488	Gm9734	0	0	0	840	4491	NR_030682	-	FALSE	0	1	78.1429	3
chr11.120046681.120046800	chr11	120046681	120046800	*	0	0	31.0589	Gm9734	0	0	0	841	4371	NR_030682	-	FALSE	1	1	294	12
chr11.120046801.120046920	chr11	120046801	120046920	*	0	0	28.0766	Gm9734	0	0	0	842	4251	NR_030682	-	FALSE	1	0	127.714	5
chr11.120047041.120047160	chr11	120047041	120047160	*	0	0	25.7176	Gm9734	0	0	0	843	4011	NR_030682	-	FALSE	1	0	115.286	9
chr11.120047281.120047400	chr11	120047281	120047400	*	0	0	31.433	Gm9734	0	0	0	844	3771	NR_030682	-	FALSE	1	1	127.857	9
chr11.120048721.120048840	chr11	120048721	120048840	*	0	0	30.8824	2810410L24Rik	0	1	0	845	2331	NR_030682	-	FALSE	1	0	128.143	7
chr11.120048841.120048960	chr11	120048841	120048960	*	0	0	27.55	2810410L24Rik	0	1	0	846	2211	NR_030682	-	FALSE	1	0	166.286	8
chr11.120090721.120090840	chr11	120090721	120090840	*	2.33147e-15	1.46236e-14	26.7501	NA	0	0	0	847	-3421	NM_198423	+	FALSE	0	1	72.1429	2
chr11.120109801.120109920	chr11	120109801	120109920	*	0	0	33.511	Bahcc1	0	0	1	848	15542	NM_198423	+	FALSE	0	0	54.5714	1
chr11.120131161.120131280	chr11	120131161	120131280	*	0	0	31.1799	Bahcc1	0	0	1	849	36902	NM_198423	+	FALSE	0	0	130.429	2
chr11.120141721.120141840	chr11	120141721	120141840	*	8.32667e-15	4.94052e-14	33.5442	Bahcc1	0	0	1	850	47462	NM_198423	+	FALSE	0	0	46.5714	2
chr11.120231241.120231360	chr11	120231241	120231360	*	2.85882e-13	1.4469e-12	28.4834	2310003H01Rik	0	1	0	851	8395	NM_172802	+	FALSE	0	0	55	3
chr11.120297961.120298080	chr11	120297961	120298080	*	0	0	26.6939	Nploc4	1	0	1	852	935	NM_199469	-	TRUE	0	1	170	1
chr11.120489601.120489720	chr11	120489601	120489720	*	0	0	-28.523	Mafg	0	1	0	853	-3286	NM_153056	-	FALSE	0	0	84.2857	3
chr11.120489721.120489840	chr11	120489721	120489840	*	1.11022e-16	7.76597e-16	-28.9098	Mafg	0	1	0	854	-3406	NM_153056	-	FALSE	0	0	54	2
chr11.120490921.120491040	chr11	120490921	120491040	*	0	0	-37.5546	Mafg	0	1	0	855	3822	NM_010756	-	FALSE	0	0	70.2857	7
chr11.120594841.120594960	chr11	120594841	120594960	*	0	0	26.1464	NA	0	0	0	856	-1507	NM_007621	-	FALSE	0	0	52.4286	1
chr11.121558681.121558800	chr11	121558681	121558800	*	0	0	-37.7176	NA	0	0	0	857	-4941	NM_144797	+	FALSE	0	0	82	1
chr11.121558801.121558920	chr11	121558801	121558920	*	0	0	-27.9341	NA	0	0	0	858	-4821	NM_144797	+	FALSE	0	0	107.143	1
chr11.121602721.121602840	chr11	121602721	121602840	*	0	0	28.0675	NA	0	0	0	859	38982	NM_144797	+	FALSE	0	0	77	1
chr11.17092201.17092320	chr11	17092201	17092320	*	0	0	-28.1215	Ppp3r1	0	0	1	860	19273	NM_025443	-	TRUE	0	0	196.143	2
chr11.18898681.18898800	chr11	18898681	18898800	*	0	0	-25.8816	Meis1	0	0	1	861	20173	NM_001193271	-	FALSE	0	0	137.571	1
chr11.19483681.19483800	chr11	19483681	19483800	*	0	0	33.0811	NA	0	0	0	862	-340645	NM_033523	+	FALSE	0	0	109.143	1
chr11.19843921.19844040	chr11	19843921	19844040	*	3.10862e-15	1.92576e-14	-29.745	Spred2	0	0	1	863	19478	NM_033523	+	FALSE	0	0	55.7143	1
chr11.19855201.19855320	chr11	19855201	19855320	*	0	0	25.7485	Spred2	0	0	1	864	30758	NM_033523	+	FALSE	0	0	260.571	3
chr11.19855321.19855440	chr11	19855321	19855440	*	0	0	33.5381	Spred2	0	0	1	865	30878	NM_033523	+	FALSE	0	0	73.5714	1
chr11.19855441.19855560	chr11	19855441	19855560	*	0	0	27.7624	Spred2	0	0	1	866	30998	NM_033523	+	FALSE	0	0	120.571	3
chr11.19887001.19887120	chr11	19887001	19887120	*	0	0	31.6707	Spred2	0	0	1	867	62558	NM_033523	+	FALSE	0	0	91	1
chr11.20044921.20045040	chr11	20044921	20045040	*	1.48193e-09	4.8296e-09	26.4171	NA	0	0	0	868	-31968	NM_146243	-	FALSE	0	0	42.5714	1
chr1.120287161.120287280	chr1	120287161	120287280	*	8.88178e-16	5.7972e-15	27.4525	Clasp1	0	0	1	869	1528	NM_029709	+	FALSE	0	1	69.2857	1
chr1.120378001.120378120	chr1	120378001	120378120	*	0	0	34.0293	Clasp1	0	0	1	870	-22160	NR_027901	-	FALSE	0	0	69.2857	1
chr1.120422041.120422160	chr1	120422041	120422160	*	0	0	29.4683	Clasp1	0	0	1	871	-66200	NR_027901	-	FALSE	0	0	261.714	2
chr11.20461681.20461800	chr11	20461681	20461800	*	0	0	28.1674	Sertad2	0	0	1	872	18427	NM_021372	+	FALSE	0	0	86.8571	2
chr11.20540041.20540160	chr11	20540041	20540160	*	0	0	34.655	Sertad2	0	0	1	873	8063	NM_001038625	+	FALSE	0	0	96.5714	2
chr11.20540161.20540280	chr11	20540161	20540280	*	0	0	36.735	Sertad2	0	0	1	874	8183	NM_001038625	+	FALSE	0	0	93.8571	3
chr11.20548201.20548320	chr11	20548201	20548320	*	0	0	28.1923	Sertad2	0	1	0	875	16223	NM_001038625	+	FALSE	0	0	295.571	4
chr11.20548441.20548560	chr11	20548441	20548560	*	0	0	28.2941	Sertad2	0	1	0	876	16463	NM_001038625	+	FALSE	0	0	170	3
chr11.20759521.20759640	chr11	20759521	20759640	*	0	0	25.9884	NA	0	0	0	877	-28411	NM_173752	-	FALSE	0	0	95.1429	3
chr11.20816641.20816760	chr11	20816641	20816760	*	0	0	29.7549	NA	0	0	0	878	-85531	NM_173752	-	FALSE	0	0	153.714	2
chr11.20816761.20816880	chr11	20816761	20816880	*	0	0	30.5556	NA	0	0	0	879	-85651	NM_173752	-	FALSE	0	0	351.571	3
chr11.20860681.20860800	chr11	20860681	20860800	*	0	0	26.3482	NA	0	0	0	880	-129571	NM_173752	-	FALSE	0	0	100.429	2
chr1.121113961.121114080	chr1	121113961	121114080	*	4.44089e-16	2.9725e-15	27.6349	NA	0	0	0	881	-163766	NM_001081125	-	FALSE	0	0	57.2857	1
chr1.121202041.121202160	chr1	121202041	121202160	*	7.38403e-10	2.50256e-09	26.2216	NA	0	0	0	882	116666	NM_008381	-	FALSE	0	0	47.1429	2
chr1.121225801.121225920	chr1	121225801	121225920	*	0	0	32.4435	NA	0	0	0	883	92906	NM_008381	-	FALSE	0	0	59.8571	2
chr1.121350481.121350600	chr1	121350481	121350600	*	0	0	28.1194	NA	0	0	0	884	-31657	NM_008381	-	FALSE	0	0	114.571	2
chr1.121373641.121373760	chr1	121373641	121373760	*	0	0	-33.7962	Ralb	0	0	1	885	27600	NM_022327	-	FALSE	0	0	67.1429	4
chr1.121400161.121400280	chr1	121400161	121400280	*	0	0	26.8768	Ralb	0	0	1	886	1080	NM_022327	-	FALSE	0	1	495.714	2
chr1.121400281.121400400	chr1	121400281	121400400	*	0	0	33.4988	Ralb	1	0	1	887	960	NM_022327	-	TRUE	0	1	79.1429	1
chr1.121862641.121862760	chr1	121862641	121862760	*	0	0	25.5898	Gm101	0	0	1	888	29028	NM_001115074	-	FALSE	0	0	137	2
chr11.21907081.21907200	chr11	21907081	21907200	*	0	0	-31.0906	Ehbp1	0	1	1	889	-5428	NM_011023	-	FALSE	0	0	107.429	6
chr11.21907921.21908040	chr11	21907921	21908040	*	0	0	-36.9402	Ehbp1	0	0	1	890	-6268	NM_011023	-	FALSE	0	0	215.143	3
chr1.121934281.121934400	chr1	121934281	121934400	*	3.59712e-14	2.00443e-13	25.8586	Sctr	0	0	1	891	30726	NM_001012322	+	FALSE	0	0	71	3
chr11.22529041.22529160	chr11	22529041	22529160	*	0	0	34.7656	NA	0	0	0	892	116757	NM_153596	+	FALSE	0	0	93.7143	2
chr11.22529161.22529280	chr11	22529161	22529280	*	0	0	36.6883	NA	0	0	0	893	116877	NM_153596	+	FALSE	0	0	50.2857	1
chr11.22529521.22529640	chr11	22529521	22529640	*	0	0	38.0588	NA	0	0	0	894	117237	NM_153596	+	FALSE	0	0	86.1429	3
chr11.22529641.22529760	chr11	22529641	22529760	*	0	0	32.5823	NA	0	0	0	895	117357	NM_153596	+	FALSE	0	0	51.7143	1
chr11.22529881.22530000	chr11	22529881	22530000	*	0	0	35.411	NA	0	0	0	896	117597	NM_153596	+	FALSE	0	0	194.143	4
chr11.22662601.22662720	chr11	22662601	22662720	*	0	0	-32.3625	NA	0	0	0	897	97016	NM_016888	-	FALSE	0	0	196.571	6
chr11.22662721.22662840	chr11	22662721	22662840	*	0	0	-28.1938	NA	0	0	0	898	96896	NM_016888	-	FALSE	0	0	288	7
chr11.22662841.22662960	chr11	22662841	22662960	*	0	0	-27.1399	NA	0	0	0	899	96776	NM_016888	-	FALSE	0	0	147.857	1
chr11.22700521.22700640	chr11	22700521	22700640	*	0	0	29.4369	NA	0	0	0	900	59096	NM_016888	-	FALSE	0	0	122.429	4
chr11.22713481.22713600	chr11	22713481	22713600	*	0	0	-26.9377	NA	0	0	0	901	46136	NM_016888	-	FALSE	0	0	119.714	1
chr11.22713841.22713960	chr11	22713841	22713960	*	0	0	-31.9288	NA	0	0	0	902	45776	NM_016888	-	FALSE	0	0	103.714	1
chr11.22748761.22748880	chr11	22748761	22748880	*	0	0	-29.9625	B3gnt2	0	0	1	903	10856	NM_016888	-	FALSE	0	0	313	3
chr11.22757281.22757400	chr11	22757281	22757400	*	0	0	-29.3845	B3gnt2	0	0	1	904	2336	NM_016888	-	FALSE	0	1	181.857	1
chr11.22757521.22757640	chr11	22757521	22757640	*	6.99104e-11	2.68873e-10	-26.4427	B3gnt2	0	0	1	905	2096	NM_016888	-	FALSE	0	1	51.1429	2
chr11.22771441.22771560	chr11	22771441	22771560	*	7.69357e-09	2.27837e-08	-27.8972	NA	0	0	0	906	-11106	NM_001169114	-	FALSE	0	0	34	1
chr11.22997161.22997280	chr11	22997161	22997280	*	0	0	30.515	NA	0	0	0	907	83776	NM_028672	+	FALSE	0	0	107.429	1
chr11.23040961.23041080	chr11	23040961	23041080	*	0	0	34.9228	NA	0	0	0	908	-114961	NM_134014	+	FALSE	0	0	238.143	2
chr11.23041081.23041200	chr11	23041081	23041200	*	0	0	35.6304	NA	0	0	0	909	-114841	NM_134014	+	FALSE	0	0	100.857	1
chr11.23041201.23041320	chr11	23041201	23041320	*	0	0	26.8367	NA	0	0	0	910	-114721	NM_134014	+	FALSE	0	0	253.143	4
chr11.23983441.23983560	chr11	23983441	23983560	*	0	0	-27.6708	Bcl11a	0	0	1	911	2748	NM_001159290	+	FALSE	0	1	114.571	1
chr11.23983561.23983680	chr11	23983561	23983680	*	0	0	-25.6383	Bcl11a	0	0	1	912	2868	NM_001159290	+	FALSE	0	1	353.571	4
chr11.24032161.24032280	chr11	24032161	24032280	*	0	0	-35.1695	Bcl11a	0	0	1	913	51468	NM_001159290	+	FALSE	0	0	82.5714	3
chr11.25214041.25214160	chr11	25214041	25214160	*	0	0	28.9044	NA	0	0	0	914	-11947	NR_045853	+	FALSE	0	0	110.286	4
chr1.125871121.125871240	chr1	125871121	125871240	*	1.22125e-15	7.8753e-15	29.8292	Dpp10	0	0	1	915	70897	NM_199021	-	FALSE	0	0	61.7143	2
chr11.26705041.26705160	chr11	26705041	26705160	*	0	0	-30.9613	NA	0	0	0	916	19935	NR_002890	+	FALSE	0	0	82.8571	1
chr1.127363321.127363440	chr1	127363321	127363440	*	0	0	-28.6419	NA	0	0	0	917	-31018	NM_023735	-	FALSE	0	0	76.5714	1
chr1.127364761.127364880	chr1	127364761	127364880	*	0	0	-25.0215	NA	0	0	0	918	-32458	NM_023735	-	FALSE	0	0	369.429	4
chr1.127422841.127422960	chr1	127422841	127422960	*	0	0	31.8363	NA	0	0	0	919	-34633	NM_028787	+	FALSE	0	0	109.857	1
chr1.127584721.127584840	chr1	127584721	127584840	*	0	0	34.794	Gpr39	0	0	1	920	11150	NM_027677	+	FALSE	0	0	71	2
chr1.12804961.12805080	chr1	12804961	12805080	*	0	0	-34.4544	Sulf1	0	0	1	921	96337	NM_172294	+	FALSE	0	0	127.714	5
chr1.128812921.128813040	chr1	128812921	128813040	*	0	0	-29.7111	NA	0	0	0	922	-85713	NM_176957	-	FALSE	0	0	48.1429	2
chr1.129199441.129199560	chr1	129199441	129199560	*	0	0	-32.3054	Mgat5	0	0	1	923	97880	NM_145128	+	FALSE	0	0	192.143	2
chr1.129205681.129205800	chr1	129205681	129205800	*	0	0	-26.3521	Mgat5	0	0	1	924	104120	NM_145128	+	FALSE	0	0	251.714	2
chr1.129206041.129206160	chr1	129206041	129206160	*	4.31877e-14	2.38638e-13	-25.003	Mgat5	0	0	1	925	104480	NM_145128	+	FALSE	0	0	53.2857	2
chr11.29274721.29274840	chr11	29274721	29274840	*	6.66134e-16	4.39546e-15	28.2495	Ccdc88a	1	0	1	926	948	NM_176841	+	TRUE	0	1	57.5714	2
chr11.29926561.29926680	chr11	29926561	29926680	*	6.55032e-15	3.92681e-14	25.8187	NA	1	0	0	927	-529	NM_146016	-	TRUE	0	1	70.1429	2
chr11.30002641.30002760	chr11	30002641	30002760	*	0	0	38.774	Spnb2	0	0	1	928	-76609	NM_146016	-	FALSE	0	0	55	1
chr11.30066721.30066840	chr11	30066721	30066840	*	1.17578e-11	4.95407e-11	-25.5595	Spnb2	0	0	1	929	31418	NM_009260	-	FALSE	0	0	49	1
chr11.30087121.30087240	chr11	30087121	30087240	*	0	0	-25.9633	Spnb2	0	0	1	930	11018	NM_009260	-	FALSE	0	0	141.857	1
chr11.30138361.30138480	chr11	30138361	30138480	*	9.83122e-11	3.71415e-10	26.3477	NA	0	0	0	931	-18590	NM_175836	-	FALSE	0	0	45	1
chr11.30166201.30166320	chr11	30166201	30166320	*	0	0	29.1159	NA	0	0	0	932	-46430	NM_175836	-	FALSE	0	1	80.5714	1
chr1.130343881.130344000	chr1	130343881	130344000	*	0	0	-33.1871	NA	0	0	0	933	-29889	NM_145507	-	FALSE	0	0	364.143	4
chr1.130344001.130344120	chr1	130344001	130344120	*	0	0	-34.6792	NA	0	0	0	934	-30009	NM_145507	-	FALSE	0	0	77.5714	1
chr11.30472921.30473040	chr11	30472921	30473040	*	0	0	28.7406	Acyp2	0	0	1	935	76357	NM_029344	-	FALSE	0	0	157.286	5
chr1.130757041.130757160	chr1	130757041	130757160	*	0	0	26.661	NA	0	0	0	936	-268166	NM_009911	-	FALSE	0	0	193.714	3
chr11.31258921.31259040	chr11	31258921	31259040	*	0	0	34.7664	NA	0	0	0	937	11022	NM_011491	-	FALSE	0	0	182.286	4
chr11.31712281.31712400	chr11	31712281	31712400	*	0	0	-25.6317	NA	0	0	0	938	-59811	NM_026252	+	FALSE	0	0	194.714	4
chr11.31732081.31732200	chr11	31732081	31732200	*	0	0	-27.0796	NA	0	0	0	939	-40011	NM_026252	+	FALSE	0	0	72.4286	1
chr11.31772401.31772520	chr11	31772401	31772520	*	0	0	30.3326	Cpeb4	1	1	0	940	192	NM_026252	+	TRUE	0	1	61.4286	1
chr11.31772641.31772760	chr11	31772641	31772760	*	0	0	27.7108	Cpeb4	1	1	0	941	432	NM_026252	+	TRUE	0	1	349.571	4
chr11.31773001.31773120	chr11	31773001	31773120	*	0	0	26.1625	Cpeb4	1	1	0	942	792	NM_026252	+	TRUE	0	1	96.1429	1
chr11.31773121.31773240	chr11	31773121	31773240	*	0	0	29.2994	Cpeb4	1	1	0	943	912	NM_026252	+	TRUE	0	1	236.143	4
chr11.31773241.31773360	chr11	31773241	31773360	*	0	0	35.97	Cpeb4	0	1	0	944	1032	NM_026252	+	FALSE	0	1	238	3
chr11.31773361.31773480	chr11	31773361	31773480	*	0	0	37.5531	Cpeb4	0	1	1	945	1152	NM_026252	+	FALSE	0	1	71	1
chr11.32100361.32100480	chr11	32100361	32100480	*	0	0	-28.2555	NA	1	0	0	946	-83	NM_008374	-	TRUE	0	0	97	3
chr11.32121001.32121120	chr11	32121001	32121120	*	0	0	30.7424	Rhbdf1	0	0	1	947	1174	NM_010117	-	FALSE	0	1	164	1
chr11.32137201.32137320	chr11	32137201	32137320	*	0	0	32.3486	Mare	0	1	1	948	10698	NM_010822	+	FALSE	0	0	78.2857	2
chr11.32143681.32143800	chr11	32143681	32143800	*	7.86072e-11	3.00335e-10	28.047	Mare	0	0	1	949	17178	NM_010822	+	FALSE	0	0	44.8571	1
chr11.32249401.32249520	chr11	32249401	32249520	*	0	0	27.1244	Sh3pxd2b	0	0	1	950	1592	NM_177364	+	FALSE	0	1	126.857	4
chr11.32389201.32389320	chr11	32389201	32389320	*	2.88658e-15	1.79489e-14	-28.1062	Ubtd2	0	0	1	951	33831	NM_173784	+	FALSE	0	0	55.2857	1
chr11.32453041.32453160	chr11	32453041	32453160	*	0	0	27.7577	Stk10	0	0	1	952	19777	NM_009288	+	FALSE	0	0	147.714	2
chr11.32502361.32502480	chr11	32502361	32502480	*	2.73578e-09	8.61318e-09	26.7842	Stk10	0	0	1	953	-40075	NM_001271347	+	FALSE	0	0	40.8571	1
chr11.32571721.32571840	chr11	32571721	32571840	*	0	0	-26.5915	Fbxw11	0	0	1	954	29168	NM_001271348	+	FALSE	0	0	295.429	2
chr11.32618401.32618520	chr11	32618401	32618520	*	1.1392e-12	5.39144e-12	27.0739	Fbxw11	0	0	1	955	75848	NM_001271348	+	FALSE	0	0	59.1429	1
chr1.132628561.132628680	chr1	132628561	132628680	*	3.93863e-10	1.38248e-09	26.8672	AA986860	1	1	0	956	10	NM_177604	+	TRUE	0	0	43.5714	2
chr1.132642841.132642960	chr1	132642841	132642960	*	1.11022e-16	7.76597e-16	25.0349	NA	0	0	0	957	14290	NM_177604	+	FALSE	0	0	87.4286	1
chr1.132769561.132769680	chr1	132769561	132769680	*	0	0	-29.5451	Faim3	0	0	1	958	7209	NM_026976	+	FALSE	0	0	103	1
chr1.133009201.133009320	chr1	133009201	133009320	*	0	0	26.0736	NA	0	0	0	959	-15082	NM_008551	-	FALSE	0	0	107.571	1
chr1.133032841.133032960	chr1	133032841	133032960	*	0	0	-25.012	Dyrk3	0	1	1	960	1852	NM_145508	-	FALSE	0	1	292	2
chr1.133095121.133095240	chr1	133095121	133095240	*	0	0	-26.5088	Rassf5	0	0	1	961	45339	NM_010709	+	FALSE	0	0	587.143	4
chr1.133095241.133095360	chr1	133095241	133095360	*	0	0	-26.9856	Rassf5	0	0	1	962	45459	NM_010709	+	FALSE	0	0	254.714	2
chr1.133095481.133095600	chr1	133095481	133095600	*	0	0	-28.4429	Rassf5	0	0	1	963	45699	NM_010709	+	FALSE	0	0	80.8571	1
chr1.133096081.133096200	chr1	133096081	133096200	*	0	0	-28.3617	Rassf5	0	0	1	964	45556	NM_018750	-	TRUE	0	0	446.286	3
chr1.133096321.133096440	chr1	133096321	133096440	*	0	0	-29.3569	Rassf5	0	0	1	965	45316	NM_018750	-	TRUE	0	0	262.714	5
chr1.133179001.133179120	chr1	133179001	133179120	*	0	0	28.9044	NA	0	0	0	966	-2862	NM_019777	-	FALSE	0	0	317.286	6
chr1.133375561.133375680	chr1	133375561	133375680	*	0	0	26.6242	Srgap2	0	0	1	967	48259	NM_001081011	-	FALSE	0	0	281.143	2
chr1.133421521.133421640	chr1	133421521	133421640	*	0	0	25.2529	Srgap2	0	1	0	968	2299	NM_001081011	-	TRUE	0	1	207.714	5
chr1.133443721.133443840	chr1	133443721	133443840	*	0	0	27.0799	NA	0	0	0	969	19157	NM_175382	+	FALSE	0	0	101.429	1
chr1.133445161.133445280	chr1	133445161	133445280	*	0	0	25.5718	NA	0	0	0	970	20597	NM_175382	+	FALSE	0	0	110.714	1
chr11.33478921.33479040	chr11	33478921	33479040	*	9.53682e-14	5.08416e-13	27.6456	Gabrp	1	1	0	971	0	NM_146017	-	TRUE	0	0	57.5714	3
chr11.33508201.33508320	chr11	33508201	33508320	*	0	0	26.8325	D130052B06Rik	0	0	0	972	-29245	NM_146017	-	FALSE	0	0	86.2857	3
chr1.133598641.133598760	chr1	133598641	133598760	*	0	0	-34.6353	5430435G22Rik	0	0	1	973	13371	NM_145509	+	FALSE	0	0	48.8571	1
chr1.133762921.133763040	chr1	133762921	133763040	*	0	0	-26.6267	NA	1	0	0	974	-814	NM_144875	+	TRUE	0	1	104.286	1
chr1.133763041.133763160	chr1	133763041	133763160	*	0	0	-28.3107	NA	1	0	0	975	-694	NM_144875	+	TRUE	0	1	106.857	1
chr11.33839281.33839400	chr11	33839281	33839400	*	2.22045e-16	1.52189e-15	-25.9701	NA	0	0	1	976	-23613	NM_031169	+	FALSE	0	0	58.4286	1
chr1.133850881.133851000	chr1	133850881	133851000	*	6.91447e-13	3.34982e-12	-27.7572	NA	0	0	0	977	-8492	NM_001177628	+	FALSE	0	0	57.8571	1
chr1.133851001.133851120	chr1	133851001	133851120	*	1.44873e-12	6.77621e-12	-25.7936	NA	0	0	0	978	-8372	NM_001177628	+	FALSE	0	0	63.2857	2
chr11.3388201.3388320	chr11	3388201	3388320	*	0	0	34.4748	Pla2g3	1	1	0	979	0	NM_172791	+	TRUE	0	0	100.714	2
chr11.33908281.33908400	chr11	33908281	33908400	*	0	0	-38.1219	NA	0	0	0	980	-15089	NM_001190886	-	FALSE	0	0	67.2857	3
chr11.33963721.33963840	chr11	33963721	33963840	*	0	0	-28.6719	Lcp2	0	0	1	981	16522	NM_010696	+	FALSE	0	0	95.4286	2
chr11.33964201.33964320	chr11	33964201	33964320	*	0	0	-32.9921	Lcp2	0	0	1	982	17002	NM_010696	+	FALSE	0	0	57.8571	1
chr1.134092921.134093040	chr1	134092921	134093040	*	1.50924e-12	7.04483e-12	27.6003	NA	0	0	1	983	-1625	NR_029777	+	FALSE	0	0	53.4286	2
chr11.3415561.3415680	chr11	3415561	3415680	*	1.55431e-15	9.92452e-15	27.0758	Selm	1	0	1	984	858	NM_053267	+	TRUE	0	1	79.4286	1
chr1.134163721.134163840	chr1	134163721	134163840	*	0	0	32.9429	NA	0	0	0	985	-31363	NM_144810	+	FALSE	0	0	76.1429	2
chr1.134202961.134203080	chr1	134202961	134203080	*	0	0	-28.5263	Klhdc8a	0	1	0	986	7760	NM_144810	+	FALSE	0	0	161.857	2
chr1.134230801.134230920	chr1	134230801	134230920	*	0	0	29.3472	NA	0	0	0	987	18101	NM_028778	+	FALSE	0	0	144.143	2
chr1.134232121.134232240	chr1	134232121	134232240	*	0	0	27.047	NA	0	0	0	988	19421	NM_028778	+	FALSE	0	0	104.857	2
chr1.134232241.134232360	chr1	134232241	134232360	*	0	0	40.7124	NA	0	0	0	989	19541	NM_028778	+	FALSE	0	0	98.4286	4
chr1.134267041.134267160	chr1	134267041	134267160	*	9.65894e-15	5.69356e-14	26.6337	Tmcc2	0	0	1	990	20699	NM_178874	-	FALSE	0	0	66.1429	2
chr1.134286481.134286600	chr1	134286481	134286600	*	0	0	36.6901	Tmcc2	0	0	1	991	1259	NM_178874	-	TRUE	0	1	122.571	2
chr1.134286601.134286720	chr1	134286601	134286720	*	0	0	32.7033	Tmcc2	0	0	1	992	1139	NM_178874	-	TRUE	0	1	122.714	2
chr11.34427281.34427400	chr11	34427281	34427400	*	0	0	29.9675	NA	0	0	1	993	169926	NM_033374	-	FALSE	0	0	73.2857	1
chr11.34518241.34518360	chr11	34518241	34518360	*	2.5739e-11	1.04302e-10	30.2195	Dock2	0	0	1	994	78966	NM_033374	-	FALSE	0	0	41.1429	1
chr11.34596601.34596720	chr11	34596601	34596720	*	1.11022e-16	7.76597e-16	-36.0563	Dock2	1	0	1	995	606	NM_033374	-	TRUE	0	0	47.7143	1
chr11.34596721.34596840	chr11	34596721	34596840	*	0	0	-27.5545	Dock2	1	0	1	996	486	NM_033374	-	TRUE	0	0	88.7143	2
chr11.34597081.34597200	chr11	34597081	34597200	*	0	0	-31.4078	Dock2	1	0	1	997	126	NM_033374	-	TRUE	0	0	198.714	4
chr11.34597201.34597320	chr11	34597201	34597320	*	0	0	-42.4449	Dock2	1	1	1	998	6	NM_033374	-	TRUE	0	0	235.714	5
chr11.34597681.34597800	chr11	34597681	34597800	*	0	0	-32.3453	NA	1	0	0	999	-357	NM_033374	-	TRUE	0	0	93.5714	3
chr11.3474601.3474720	chr11	3474601	3474720	*	0	0	30.9156	NA	0	0	0	1000	-35307	NM_001159284	-	FALSE	0	0	265.286	3
chr11.3474721.3474840	chr11	3474721	3474840	*	0	0	33.4333	NA	0	0	0	1001	-35427	NM_001159284	-	FALSE	0	0	82.8571	2
chr1.134973481.134973600	chr1	134973481	134973600	*	0	0	27.2862	Pik3c2b	0	0	1	1002	30894	NM_001099276	+	FALSE	0	0	111.714	3
chr1.134973601.134973720	chr1	134973601	134973720	*	0	0	27.381	Pik3c2b	0	0	1	1003	31014	NM_001099276	+	FALSE	0	0	75.8571	2
chr1.134973721.134973840	chr1	134973721	134973840	*	0	0	26.4024	Pik3c2b	0	0	1	1004	31134	NM_001099276	+	FALSE	0	0	121.143	3
chr11.35109001.35109120	chr11	35109001	35109120	*	0	0	29.3749	Slit3	0	0	1	1005	174045	NM_011412	+	FALSE	0	0	63.5714	1
chr1.135119521.135119640	chr1	135119521	135119640	*	0	0	38.4886	NA	0	0	0	1006	-23034	NM_001160268	+	FALSE	0	0	101.714	4
chr11.35231521.35231640	chr11	35231521	35231640	*	0	0	27.8541	Slit3	0	0	1	1007	-198678	NR_029799	+	FALSE	0	0	118.286	3
chr1.135294601.135294720	chr1	135294601	135294720	*	1.4968e-12	6.99108e-12	26.4942	Sox13	0	0	1	1008	26070	NM_011439	-	FALSE	0	0	60.7143	4
chr1.135349201.135349320	chr1	135349201	135349320	*	0	0	32.1476	NA	0	0	0	1009	-28413	NM_011439	-	FALSE	0	0	77	3
chr1.135383161.135383280	chr1	135383161	135383280	*	0	0	30.1274	NA	0	0	0	1010	-62373	NM_011439	-	FALSE	0	0	216.714	3
chr1.135592921.135593040	chr1	135592921	135593040	*	0	0	29.656	NA	0	0	0	1011	-6237	NM_001159649	-	FALSE	0	0	100.714	1
chr1.135638521.135638640	chr1	135638521	135638640	*	0	0	27.5642	Atp2b4	0	0	1	1012	11685	NM_001167949	-	FALSE	0	0	120.857	3
chr1.135638761.135638880	chr1	135638761	135638880	*	0	0	30.2233	Atp2b4	0	0	1	1013	11445	NM_001167949	-	FALSE	0	0	83.8571	4
chr1.13564081.13564200	chr1	13564081	13564200	*	0	0	-25.0558	Tram1	0	0	1	1014	15746	NM_028173	-	FALSE	0	0	313.571	2
chr11.35655601.35655720	chr11	35655601	35655720	*	0	0	-25.6949	Wwc1	0	0	1	1015	-7572	NM_025936	-	FALSE	0	0	645.571	5
chr1.135782761.135782880	chr1	135782761	135782880	*	0	0	-26.3902	NA	0	0	0	1016	20871	NM_001160421	-	FALSE	0	0	97	1
chr11.35784961.35785080	chr11	35784961	35785080	*	0	0	31.5316	Wwc1	0	0	1	1017	8512	NM_170779	-	FALSE	0	0	111.286	2
chr1.135814201.135814320	chr1	135814201	135814320	*	0	0	39.9762	Prelp	0	0	1	1018	3659	NM_054077	-	FALSE	0	0	59.8571	1
chr1.135814321.135814440	chr1	135814321	135814440	*	0	0	30.0132	Prelp	0	0	1	1019	3539	NM_054077	-	FALSE	0	0	93.7143	3
chr1.135814561.135814680	chr1	135814561	135814680	*	5.56333e-13	2.72456e-12	25.9345	Prelp	0	0	1	1020	3299	NM_054077	-	FALSE	0	0	62.8571	2
chr1.135830761.135830880	chr1	135830761	135830880	*	0	0	25.2943	NA	0	0	0	1021	-12784	NM_054077	-	FALSE	0	0	146.571	1
chr1.135831001.135831120	chr1	135831001	135831120	*	0	0	32.5649	NA	0	0	0	1022	-13024	NM_054077	-	FALSE	0	0	206.143	4
chr1.135831121.135831240	chr1	135831121	135831240	*	0	0	28.4241	NA	0	0	0	1023	-13144	NM_054077	-	FALSE	0	0	114.143	2
chr1.135997681.135997800	chr1	135997681	135997800	*	0	0	26.7315	NA	0	0	0	1024	-10019	NM_027979	+	FALSE	0	0	73.5714	1
chr1.136240561.136240680	chr1	136240561	136240680	*	0	0	29.0132	NA	0	0	0	1025	-11057	NM_001144855	-	FALSE	0	1	67.2857	5
chr1.136315441.136315560	chr1	136315441	136315560	*	0	0	26.1842	Adipor1	0	0	1	1026	3399	NM_028320	+	FALSE	0	0	122	1
chr1.136316761.136316880	chr1	136316761	136316880	*	4.4742e-14	2.46798e-13	25.9405	Adipor1	0	0	1	1027	4719	NM_028320	+	FALSE	0	0	54.5714	1
chr1.13659001.13659120	chr1	13659001	13659120	*	0	0	27.1869	Xkr9	1	0	1	1028	151	NM_001011873	+	TRUE	0	0	180.429	2
chr1.136601881.136602000	chr1	136601881	136602000	*	3.33067e-16	2.25203e-15	28.1218	Syt2	0	0	1	1029	58625	NM_009307	+	FALSE	0	0	69	1
chr1.136726321.136726440	chr1	136726321	136726440	*	1.06862e-11	4.52585e-11	31.2314	Ppp1r12b	0	0	1	1030	-26024	NR_015606	-	FALSE	0	0	39.2857	1
chr1.137029561.137029680	chr1	137029561	137029680	*	0	0	-40.5017	Ptpn7	1	0	1	1031	261	NM_177081	+	TRUE	0	0	110.857	2
chr1.137032081.137032200	chr1	137032081	137032200	*	2.22045e-16	1.52189e-15	-34.235	Ptpn7	0	0	1	1032	2781	NM_177081	+	FALSE	0	0	49.8571	1
chr1.137045161.137045280	chr1	137045161	137045280	*	3.32623e-13	1.67173e-12	26.4877	Arl8a	0	0	1	1033	1752	NM_026823	+	FALSE	0	1	48.1429	2
chr1.137101441.137101560	chr1	137101441	137101560	*	1.11022e-16	7.76597e-16	32.3028	NA	0	0	0	1034	-37184	NM_134438	-	FALSE	0	0	54	1
chr1.137114161.137114280	chr1	137114161	137114280	*	0	0	29.6454	NA	0	0	0	1035	40770	NM_001163131	-	FALSE	0	0	119.286	4
chr1.137154841.137154960	chr1	137154841	137154960	*	0	0	26.8296	Elf3	1	1	1	1036	90	NM_001163131	-	TRUE	0	0	141.571	5
chr1.137221201.137221320	chr1	137221201	137221320	*	0	0	31.2787	NA	1	0	0	1037	-70	NM_053106	+	TRUE	0	0	96.7143	4
chr1.137610961.137611080	chr1	137610961	137611080	*	0	0	-26.4492	NA	0	0	0	1038	-14694	NM_007791	+	FALSE	0	0	366.143	4
chr1.137611681.137611800	chr1	137611681	137611800	*	0	0	-30.1569	NA	0	0	0	1039	-13974	NM_007791	+	FALSE	0	0	97.7143	1
chr1.137628481.137628600	chr1	137628481	137628600	*	0	0	41.38	Csrp1	0	0	1	1040	2709	NM_007791	+	FALSE	0	0	123	2
chr1.137628601.137628720	chr1	137628601	137628720	*	0	0	37.0543	Csrp1	0	0	1	1041	2829	NM_007791	+	FALSE	0	0	95.1429	2
chr1.137652241.137652360	chr1	137652241	137652360	*	0	0	33.2071	NA	0	0	0	1042	-10302	NM_013750	+	FALSE	0	0	71.7143	1
chr1.137679481.137679600	chr1	137679481	137679600	*	0	0	29.1452	NA	0	0	0	1043	-16398	NM_021467	+	FALSE	0	0	104.429	4
chr1.137679721.137679840	chr1	137679721	137679840	*	0	0	28.6513	NA	0	0	0	1044	-16158	NM_021467	+	FALSE	0	0	208.143	3
chr1.138032041.138032160	chr1	138032041	138032160	*	0	0	-28.9663	Kif21b	0	0	1	1045	4065	NM_001039472	+	FALSE	0	0	98.4286	1
chr1.138240361.138240480	chr1	138240361	138240480	*	0	0	28.6014	Camsap1l1	0	0	1	1046	2202	NM_001081360	-	FALSE	0	1	145.143	1
chr1.138240601.138240720	chr1	138240601	138240720	*	2.22045e-16	1.52189e-15	28.6082	Camsap1l1	0	0	1	1047	1962	NM_001081360	-	FALSE	0	1	66.8571	1
chr1.138437521.138437640	chr1	138437521	138437640	*	0	0	29.2237	NA	0	0	0	1048	72988	NM_001081258	+	FALSE	0	0	281.429	4
chr1.138437641.138437760	chr1	138437641	138437760	*	0	0	28.3949	NA	0	0	0	1049	73108	NM_001081258	+	FALSE	0	0	100	1
chr1.138467401.138467520	chr1	138467401	138467520	*	4.6815e-08	1.24522e-07	25.2951	NA	0	0	0	1050	-53958	NM_177643	+	FALSE	0	0	40.7143	1
chr11.3931441.3931560	chr11	3931441	3931560	*	0	0	39.0577	NA	1	0	0	1051	-225	NM_146013	+	TRUE	0	0	88.1429	2
chr11.3931681.3931800	chr11	3931681	3931800	*	1.85618e-12	8.57333e-12	29.3016	Sec14l4	1	1	0	1052	0	NM_146013	+	TRUE	0	0	49.2857	3
chr11.3931801.3931920	chr11	3931801	3931920	*	0	0	49.8421	Sec14l4	1	1	1	1053	18	NM_146013	+	TRUE	0	0	31.7143	2
chr11.3931921.3932040	chr11	3931921	3932040	*	0	0	32.2352	Sec14l4	1	0	1	1054	138	NM_146013	+	TRUE	0	0	100.143	8
chr1.140031001.140031120	chr1	140031001	140031120	*	0	0	-25.5657	Ptprc	0	0	1	1055	40584	NM_001111316	-	FALSE	0	0	254.857	4
chr1.140032321.140032440	chr1	140032321	140032440	*	0	0	-29.1375	Ptprc	0	0	1	1056	39264	NM_001111316	-	FALSE	0	0	122	3
chr1.140033761.140033880	chr1	140033761	140033880	*	0	0	-25.8202	Ptprc	0	0	1	1057	37824	NM_001111316	-	FALSE	0	0	92.5714	1
chr1.140070961.140071080	chr1	140070961	140071080	*	0	0	-28.9774	Ptprc	1	0	1	1058	624	NM_001111316	-	TRUE	0	0	450.714	3
chr1.140071441.140071560	chr1	140071441	140071560	*	0	0	-26.9625	Ptprc	1	0	1	1059	144	NM_001111316	-	TRUE	0	0	364.143	3
chr1.140071921.140072040	chr1	140071921	140072040	*	0	0	-29.6461	NA	1	0	0	1060	-40	NM_001268286	-	TRUE	0	0	333.857	3
chr1.140072161.140072280	chr1	140072161	140072280	*	0	0	-25.69	NA	1	0	0	1061	-280	NM_001268286	-	TRUE	0	0	640.429	3
chr11.4019521.4019640	chr11	4019521	4019640	*	0	0	-33.5478	NA	1	0	0	1062	-790	NM_144520	-	TRUE	0	1	117.143	4
chr11.40503121.40503240	chr11	40503121	40503240	*	0	0	34.8042	Mat2b	0	0	1	1063	2945	NM_134017	-	FALSE	0	0	136.143	2
chr1.140503561.140503680	chr1	140503561	140503680	*	0	0	29.6092	Nek7	0	0	1	1064	12594	NM_021605	-	FALSE	0	0	129	2
chr11.40504081.40504200	chr11	40504081	40504200	*	0	0	30.9789	Mat2b	0	0	1	1065	1985	NM_134017	-	FALSE	0	1	49.4286	1
chr11.4137721.4137840	chr11	4137721	4137840	*	8.88178e-16	5.7972e-15	-28.1319	Osm	1	0	1	1066	935	NM_001013365	+	TRUE	0	0	61	4
chr11.4165921.4166040	chr11	4165921	4166040	*	7.77156e-16	5.09818e-15	-28.728	Lif	0	0	1	1067	-1058	NM_001039537	+	FALSE	0	1	66.2857	2
chr11.4171561.4171680	chr11	4171561	4171680	*	0	0	25.9953	Lif	0	1	0	1068	4465	NM_001039537	+	FALSE	0	0	111.143	5
chr11.4199161.4199280	chr11	4199161	4199280	*	0	0	28.8253	NA	0	0	0	1069	32065	NM_001039537	+	FALSE	0	0	212.143	5
chr11.4208401.4208520	chr11	4208401	4208520	*	0	0	28.6999	NA	0	0	0	1070	41305	NM_001039537	+	FALSE	0	0	180.714	3
chr11.44496601.44496720	chr11	44496601	44496720	*	1.11022e-16	7.76597e-16	33.9719	Ebf1	0	0	1	1071	64967	NM_007897	+	FALSE	0	0	46.8571	2
chr11.44498521.44498640	chr11	44498521	44498640	*	0	0	26.12	Ebf1	0	0	1	1072	66887	NM_007897	+	FALSE	0	0	150.429	3
chr11.44654641.44654760	chr11	44654641	44654760	*	0	0	31.7354	Ebf1	0	0	1	1073	223007	NM_007897	+	FALSE	0	0	109.714	2
chr1.144790681.144790800	chr1	144790681	144790800	*	0	0	-29.8843	NA	0	0	0	1074	-697027	NM_020025	+	FALSE	0	0	86.2857	1
chr11.45492241.45492360	chr11	45492241	45492360	*	5.66214e-15	3.41649e-14	26.7029	LOC100504732	0	0	0	1075	-129225	NR_045876	+	FALSE	0	0	65.7143	1
chr11.4561441.4561560	chr11	4561441	4561560	*	0	0	26.2471	Ascc2	0	0	1	1076	23647	NM_029291	+	FALSE	0	0	109.143	2
chr11.45694441.45694560	chr11	45694441	45694560	*	0	0	32.3389	Clint1	0	0	1	1077	28977	NM_001045520	+	FALSE	0	0	166.286	3
chr11.45696841.45696960	chr11	45696841	45696960	*	0	0	27.7325	Clint1	0	0	1	1078	31377	NM_001045520	+	TRUE	0	0	397	4
chr1.145763881.145764000	chr1	145763881	145764000	*	0	0	-33.5938	NA	0	0	0	1079	87280	NM_009061	-	FALSE	0	0	263.714	4
chr1.145764001.145764120	chr1	145764001	145764120	*	0	0	-26.0362	NA	0	0	0	1080	87160	NM_009061	-	FALSE	0	0	194	2
chr1.145837561.145837680	chr1	145837561	145837680	*	0	0	32.686	NA	0	0	0	1081	13600	NM_009061	-	FALSE	0	0	420.429	3
chr11.45883201.45883320	chr11	45883201	45883320	*	0	0	40.4584	Adam19	0	0	1	1082	13714	NM_009616	+	FALSE	0	0	107.857	5
chr11.45891241.45891360	chr11	45891241	45891360	*	0	0	27.3433	Adam19	0	0	1	1083	21754	NM_009616	+	FALSE	0	0	159	2
chr11.45891481.45891600	chr11	45891481	45891600	*	0	0	26.5082	Adam19	0	0	1	1084	21994	NM_009616	+	FALSE	0	0	80.5714	2
chr1.146096161.146096280	chr1	146096161	146096280	*	0	0	-30.0368	Rgs1	1	1	0	1085	0	NM_015811	-	TRUE	0	0	97.1429	3
chr11.46119001.46119120	chr11	46119001	46119120	*	0	0	-27.6095	Cyfip2	0	0	1	1086	6741	NM_133769	-	FALSE	0	0	142.429	2
chr11.46120441.46120560	chr11	46120441	46120560	*	0	0	-32.0037	Cyfip2	0	0	1	1087	5301	NM_133769	-	FALSE	0	0	215	2
chr11.46121401.46121520	chr11	46121401	46121520	*	4.28546e-14	2.36878e-13	-31.1076	Cyfip2	0	0	1	1088	4341	NM_133769	-	FALSE	0	0	49.2857	2
chr11.46123801.46123920	chr11	46123801	46123920	*	5.32907e-15	3.22612e-14	-35.6218	Cyfip2	0	0	1	1089	1941	NM_133769	-	FALSE	0	1	40	1
chr11.46123921.46124040	chr11	46123921	46124040	*	0	0	-32.685	Cyfip2	0	0	1	1090	1821	NM_133769	-	FALSE	0	1	64.7143	3
chr11.46124161.46124280	chr11	46124161	46124280	*	0	0	-35.8438	Cyfip2	0	0	1	1091	1581	NM_133769	-	FALSE	0	1	67	1
chr11.46124281.46124400	chr11	46124281	46124400	*	0	0	-32.3757	Cyfip2	0	0	1	1092	1461	NM_133769	-	FALSE	0	1	242.286	2
chr11.46124401.46124520	chr11	46124401	46124520	*	0	0	-29.7804	Cyfip2	0	0	1	1093	1341	NM_133769	-	TRUE	0	1	102.857	1
chr11.46124521.46124640	chr11	46124521	46124640	*	5.91438e-09	1.7797e-08	-28.5714	Cyfip2	0	0	1	1094	1221	NM_133769	-	TRUE	0	1	32.7143	3
chr1.146130601.146130720	chr1	146130601	146130720	*	0	0	-27.1331	NA	0	0	0	1095	-34368	NM_015811	-	FALSE	0	0	153.286	1
chr1.146154361.146154480	chr1	146154361	146154480	*	0	0	-30.2377	NA	0	0	0	1096	-58128	NM_015811	-	FALSE	0	0	350.571	3
chr11.46261441.46261560	chr11	46261441	46261560	*	0	0	-28.2112	NA	0	0	0	1097	-6873	NM_134250	+	FALSE	0	0	107.571	1
chr11.46261801.46261920	chr11	46261801	46261920	*	0	0	-28.5381	NA	0	0	0	1098	-6513	NM_134250	+	FALSE	0	0	337.286	3
chr11.46261921.46262040	chr11	46261921	46262040	*	0	0	-32.9039	NA	0	0	0	1099	-6393	NM_134250	+	FALSE	0	0	145.286	1
chr11.46262041.46262160	chr11	46262041	46262160	*	0	0	-27.9059	NA	0	0	0	1100	-6273	NM_134250	+	FALSE	0	0	104.429	1
chr1.146622241.146622360	chr1	146622241	146622360	*	0	0	-32.5371	Rgs18	1	1	1	1101	192	NM_022881	-	TRUE	0	0	113.286	1
chr1.146622601.146622720	chr1	146622601	146622720	*	0	0	-27.8764	NA	1	0	0	1102	-51	NM_022881	-	TRUE	0	0	223.429	3
chr1.14730001.14730120	chr1	14730001	14730120	*	6.57648e-09	1.96676e-08	26.3562	NA	0	0	0	1103	15928	NM_010827	-	FALSE	0	0	45.1429	2
chr11.4782961.4783080	chr11	4782961	4783080	*	0	0	33.9042	Nipsnap1	0	0	1	1104	8957	NM_008698	+	FALSE	0	0	131.571	5
chr11.4783081.4783200	chr11	4783081	4783200	*	0	0	32.62	Nipsnap1	0	0	1	1105	9077	NM_008698	+	FALSE	0	0	61.5714	2
chr11.4783321.4783440	chr11	4783321	4783440	*	0	0	39.1739	Nipsnap1	0	1	1	1106	9317	NM_008698	+	FALSE	0	0	99.1429	3
chr11.48622681.48622800	chr11	48622681	48622800	*	0	0	33.6569	Trim41	0	1	1	1107	6042	NR_028564	+	FALSE	0	0	85.2857	3
chr11.48885721.48885840	chr11	48885721	48885840	*	0	0	-30.0623	c("Olfr56", "LOC100502678")	0	0	1	1108	-4249	NM_001271677	+	FALSE	0	0	88.8571	2
chr11.4889161.4889280	chr11	4889161	4889280	*	0	0	-27.5793	Ap1b1	0	0	1	1109	2336	NM_007454	+	FALSE	0	1	301.286	2
chr11.4964161.4964280	chr11	4964161	4964280	*	0	0	30.6616	Gas2l1	0	1	0	1110	1051	NM_001190408	-	TRUE	1	1	94.8571	7
chr11.49848001.49848120	chr11	49848001	49848120	*	0	0	44.9027	Rnf130	0	0	1	1111	9170	NM_021540	+	FALSE	0	0	45.5714	1
chr11.50014321.50014440	chr11	50014321	50014440	*	0	0	28.6957	Sqstm1	0	1	0	1112	9853	NM_011018	-	FALSE	0	0	224.143	6
chr11.50031481.50031600	chr11	50031481	50031600	*	0	0	27.1796	NA	0	0	0	1113	-7190	NM_011018	-	FALSE	0	0	97.2857	4
chr11.5040721.5040840	chr11	5040721	5040840	*	0	0	34.3259	Emid1	0	0	1	1114	11386	NM_080595	-	FALSE	0	0	89.1429	3
chr11.51177841.51177960	chr11	51177841	51177960	*	7.29916e-12	3.15461e-11	27.3539	Col23a1	0	0	1	1115	74421	NM_153393	+	FALSE	0	0	53.2857	1
chr11.51447841.51447960	chr11	51447841	51447960	*	1.11022e-16	7.76597e-16	25.5218	Rmnd5b	0	0	1	1116	1439	NM_025346	-	FALSE	0	1	88.5714	1
chr11.51457921.51458040	chr11	51457921	51458040	*	0	0	-28.9742	C330016O10Rik	0	1	1	1117	-6416	NR_027958	+	FALSE	0	0	153.143	7
chr11.51458041.51458160	chr11	51458041	51458160	*	0	0	-31.0258	C330016O10Rik	0	0	1	1118	-6296	NR_027958	+	FALSE	0	0	69.7143	1
chr11.51462001.51462120	chr11	51462001	51462120	*	0	0	27.4224	C330016O10Rik	0	0	1	1119	-2336	NR_027958	+	FALSE	0	1	113.857	3
chr11.51568801.51568920	chr11	51568801	51568920	*	0	0	30.5147	Sec24a	0	0	1	1120	1417	NM_175255	-	FALSE	0	1	100.429	2
chr1.151704241.151704360	chr1	151704241	151704360	*	3.77476e-15	2.3192e-14	25.3235	Pla2g4a	0	0	1	1121	104055	NM_008869	-	FALSE	0	0	60	1
chr11.51754081.51754200	chr11	51754081	51754200	*	0	0	33.2942	NA	0	0	0	1122	-26933	NM_029976	+	FALSE	0	0	107.286	4
chr1.151795321.151795440	chr1	151795321	151795440	*	0	0	-28.2327	Pla2g4a	0	0	1	1123	12975	NM_008869	-	FALSE	0	0	127.571	3
chr1.151808881.151809000	chr1	151808881	151809000	*	0	0	-26.3368	NA	1	0	0	1124	-468	NM_008869	-	TRUE	0	0	457	2
chr1.151962481.151962600	chr1	151962481	151962600	*	0	0	32.4	NA	0	0	0	1125	15229	NM_011198	+	FALSE	0	0	108.714	1
chr1.151962601.151962720	chr1	151962601	151962720	*	0	0	31.4997	NA	0	0	0	1126	15349	NM_011198	+	FALSE	0	0	447.429	4
chr1.151962841.151962960	chr1	151962841	151962960	*	6.61915e-13	3.21377e-12	27.3239	NA	0	0	0	1127	15589	NM_011198	+	FALSE	0	0	57.5714	1
chr11.52042681.52042800	chr11	52042681	52042800	*	0	0	31.3557	NA	0	0	0	1128	-2697	NM_011543	+	FALSE	0	0	75.1429	1
chr11.52093321.52093440	chr11	52093321	52093440	*	0	0	-37.3645	c("Tcf7", "A630014C17Rik")	0	0	1	1129	2313	NM_009331	-	FALSE	0	0	71.8571	2
chr11.52113241.52113360	chr11	52113241	52113360	*	0	0	-26.5459	NA	0	0	0	1130	-17490	NM_009331	-	FALSE	0	0	147.286	3
chr11.52113481.52113600	chr11	52113481	52113600	*	0	0	-27.4272	NA	0	0	0	1131	-17730	NM_009331	-	FALSE	0	0	49.7143	2
chr11.52172041.52172160	chr11	52172041	52172160	*	0	0	25.8347	NA	0	0	0	1132	-2457	NM_011694	+	FALSE	0	1	123.571	2
chr11.52172161.52172280	chr11	52172161	52172280	*	0	0	33.6319	NA	0	0	0	1133	-2337	NM_011694	+	FALSE	0	1	47.4286	2
chr11.52251121.52251240	chr11	52251121	52251240	*	6.60308e-09	1.97408e-08	25.5904	NA	0	0	0	1134	41193	NM_153117	+	FALSE	0	0	40.2857	2
chr1.152313361.152313480	chr1	152313361	152313480	*	0	0	27.9343	NA	1	0	0	1135	-67	NM_001110146	-	TRUE	0	0	90.8571	1
chr1.152528281.152528400	chr1	152528281	152528400	*	0	0	36.8162	Hmcn1	0	0	1	1136	-214987	NM_001110146	-	FALSE	0	0	180.286	6
chr1.152921641.152921760	chr1	152921641	152921760	*	0	0	-31.5898	NA	0	0	0	1137	-63404	NR_038011	+	FALSE	0	0	236.857	2
chr1.152922121.152922240	chr1	152922121	152922240	*	0	0	-27.8843	NA	0	0	0	1138	-62924	NR_038011	+	FALSE	0	0	194	4
chr1.152922241.152922360	chr1	152922241	152922360	*	0	0	-31.4142	NA	0	0	0	1139	-62804	NR_038011	+	FALSE	0	0	225.429	4
chr11.53314561.53314680	chr11	53314561	53314680	*	0	0	36.9253	Gm12211	0	0	0	1140	-18558	NM_033144	+	FALSE	0	0	57.8571	2
chr11.53321761.53321880	chr11	53321761	53321880	*	0	0	27.9893	NA	0	0	0	1141	-11358	NM_033144	+	FALSE	0	0	123.286	2
chr11.53334121.53334240	chr11	53334121	53334240	*	4.87388e-14	2.67741e-13	31.0856	2014-09-08	1	0	1	1142	885	NM_001252332	+	TRUE	0	1	34.2857	2
chr11.53335441.53335560	chr11	53335441	53335560	*	0	0	30.1289	2014-09-08	0	0	1	1143	2205	NM_001252332	+	FALSE	0	1	187.286	2
chr11.53336641.53336760	chr11	53336641	53336760	*	0	0	27.8343	2014-09-08	0	0	1	1144	3405	NM_001252332	+	FALSE	0	0	128.857	1
chr11.53339041.53339160	chr11	53339041	53339160	*	0	0	25.8954	2014-09-08	0	0	1	1145	5805	NM_001252332	+	FALSE	0	0	287.714	3
chr11.53404081.53404200	chr11	53404081	53404200	*	0	0	-27.4842	Kif3a	0	0	1	1146	23202	NM_008443	+	FALSE	0	0	538.714	5
chr11.53404201.53404320	chr11	53404201	53404320	*	0	0	-30.0408	Kif3a	0	1	1	1147	23322	NM_008443	+	FALSE	0	0	96.1429	2
chr1.153418081.153418200	chr1	153418081	153418200	*	6.10623e-15	3.67248e-14	31.1047	NA	1	0	0	1148	-303	NM_022018	+	TRUE	0	1	46.1429	2
chr11.53423161.53423280	chr11	53423161	53423280	*	0	0	-33.1773	NA	0	0	0	1149	7561	NR_027491	-	FALSE	0	0	378	2
chr1.153455521.153455640	chr1	153455521	153455640	*	0	0	26.0546	Fam129a	0	0	1	1150	37020	NM_022018	+	FALSE	0	0	155.714	3
chr1.153540121.153540240	chr1	153540121	153540240	*	0	0	28.3751	Fam129a	0	0	1	1151	-62264	NM_001039644	+	FALSE	0	0	225.429	2
chr1.153540361.153540480	chr1	153540361	153540480	*	0	0	30.5014	Fam129a	0	0	1	1152	-62024	NM_001039644	+	FALSE	0	0	277.571	4
chr11.53601601.53601720	chr11	53601601	53601720	*	9.53414e-09	2.78819e-08	25.7402	RP23-303F24.3	0	0	1	1153	17628	NM_001159396	+	FALSE	0	0	43.8571	3
chr11.53601721.53601840	chr11	53601721	53601840	*	0	0	35.7629	RP23-303F24.3	0	0	1	1154	17748	NM_001159396	+	FALSE	0	0	64.7143	3
chr11.53610001.53610120	chr11	53610001	53610120	*	0	0	31.8746	RP23-303F24.3	0	0	1	1155	26028	NM_001159396	+	FALSE	0	0	75.5714	2
chr11.53610241.53610360	chr11	53610241	53610360	*	0	0	31.6673	RP23-303F24.3	0	0	1	1156	26268	NM_001159396	+	FALSE	0	0	164.857	3
chr11.53610721.53610840	chr11	53610721	53610840	*	0	0	34.0003	RP23-303F24.3	0	0	1	1157	26748	NM_001159396	+	FALSE	0	0	130.286	1
chr11.53610841.53610960	chr11	53610841	53610960	*	0	0	26.2411	RP23-303F24.3	0	0	1	1158	26868	NM_001159396	+	FALSE	0	0	255.857	1
chr11.53613721.53613840	chr11	53613721	53613840	*	0	0	-29.1321	RP23-303F24.3	0	0	1	1159	29748	NM_001159396	+	FALSE	0	0	87.4286	2
chr11.53702761.53702880	chr11	53702761	53702880	*	0	0	30.6071	Slc22a5	0	0	1	1160	2326	NM_011396	-	FALSE	0	1	63	1
chr11.53820481.53820600	chr11	53820481	53820600	*	0	0	27.3161	Slc22a4	0	0	1	1161	20993	NM_019687	-	FALSE	0	0	105.286	2
chr11.53905201.53905320	chr11	53905201	53905320	*	0	0	-25.3425	NA	0	0	0	1162	-9106	NM_011031	+	FALSE	0	0	107.571	1
chr1.154403401.154403520	chr1	154403401	154403520	*	0	0	33.5117	Rgl1	0	0	1	1163	68722	NM_016846	-	FALSE	0	0	97.7143	4
chr1.154403521.154403640	chr1	154403521	154403640	*	0	0	26.1344	Rgl1	0	0	1	1164	68602	NM_016846	-	FALSE	0	0	75.1429	1
chr1.154403641.154403760	chr1	154403641	154403760	*	0	0	32.2913	Rgl1	0	0	1	1165	68482	NM_016846	-	FALSE	0	0	148.857	2
chr1.154403761.154403880	chr1	154403761	154403880	*	0	0	40.6202	Rgl1	0	0	1	1166	68362	NM_016846	-	FALSE	0	0	52.5714	5
chr1.154464601.154464720	chr1	154464601	154464720	*	0	0	30.036	Rgl1	0	0	1	1167	7522	NM_016846	-	FALSE	0	0	68	1
chr1.154470001.154470120	chr1	154470001	154470120	*	0	0	36.6564	Rgl1	0	0	1	1168	2122	NM_016846	-	FALSE	0	1	152	3
chr1.154470121.154470240	chr1	154470121	154470240	*	0	0	30.8158	Rgl1	0	0	1	1169	2002	NM_016846	-	FALSE	0	1	276	2
chr1.154470241.154470360	chr1	154470241	154470360	*	0	0	33.154	Rgl1	0	0	1	1170	1882	NM_016846	-	FALSE	0	1	310.429	2
chr1.154470361.154470480	chr1	154470361	154470480	*	0	0	34.0987	Rgl1	0	0	1	1171	1762	NM_016846	-	FALSE	0	1	181.571	2
chr11.54587881.54588000	chr11	54587881	54588000	*	0	0	-26.9898	Cdc42se2	0	0	1	1172	13206	NM_178626	-	FALSE	0	0	119	1
chr1.154638601.154638720	chr1	154638601	154638720	*	0	0	26.1355	NA	0	0	0	1173	-16300	NM_010877	+	FALSE	0	0	91	1
chr11.54648241.54648360	chr11	54648241	54648360	*	0	0	36.4284	NA	0	0	0	1174	14822	NR_040284	+	FALSE	0	0	92.5714	1
chr1.154655041.154655160	chr1	154655041	154655160	*	0	0	-26.6226	Ncf2	1	1	0	1175	23	NM_010877	+	TRUE	0	0	126.143	4
chr11.54663721.54663840	chr11	54663721	54663840	*	0	0	-25.4049	Lyrm7	0	0	1	1176	10254	NM_029327	-	FALSE	0	0	138.857	2
chr11.54749761.54749880	chr11	54749761	54749880	*	9.69457e-09	2.83246e-08	-27.0479	Tnip1	0	0	1	1177	26563	NM_001199275	-	FALSE	0	0	38.2857	1
chr11.54749881.54750000	chr11	54749881	54750000	*	0	0	-29.9684	Tnip1	0	1	1	1178	26443	NM_001199275	-	FALSE	0	0	98	5
chr11.54785521.54785640	chr11	54785521	54785640	*	0	0	26.5424	NA	0	0	0	1179	-9080	NM_001271456	-	FALSE	0	0	79.8571	2
chr1.154862161.154862280	chr1	154862161	154862280	*	0	0	25.8653	Nmnat2	0	0	1	1180	59932	NM_175460	+	FALSE	0	0	355.571	4
chr11.54876481.54876600	chr11	54876481	54876600	*	0	0	29.4697	Ccdc69	0	0	1	1181	15034	NM_177471	-	FALSE	0	0	206	3
chr11.54876601.54876720	chr11	54876601	54876720	*	0	0	29.946	Ccdc69	0	0	1	1182	14914	NM_177471	-	FALSE	0	0	96.7143	1
chr1.154895281.154895400	chr1	154895281	154895400	*	0	0	35.1621	Nmnat2	0	0	1	1183	93052	NM_175460	+	FALSE	0	0	106.143	2
chr1.154895521.154895640	chr1	154895521	154895640	*	0	0	34.61	Nmnat2	0	0	1	1184	93292	NM_175460	+	FALSE	0	0	121.714	3
chr11.54900481.54900600	chr11	54900481	54900600	*	0	0	27.92	NA	0	0	0	1185	-8849	NM_177471	-	FALSE	0	0	138.143	2
chr11.54944761.54944880	chr11	54944761	54944880	*	0	0	-38.3109	Slc36a3	0	0	1	1186	20329	NM_172258	-	FALSE	0	0	156.143	1
chr11.54950521.54950640	chr11	54950521	54950640	*	2.10942e-14	1.20267e-13	-28.9091	Slc36a3	0	0	1	1187	14569	NM_172258	-	FALSE	0	0	51.4286	4
chr1.155038681.155038800	chr1	155038681	155038800	*	0	0	30.5407	NA	0	0	0	1188	-5105	NM_008485	-	FALSE	0	0	303.286	3
chr1.155048641.155048760	chr1	155048641	155048760	*	0	0	33.5164	NA	0	0	0	1189	-15065	NM_008485	-	FALSE	0	0	69.1429	4
chr11.55192321.55192440	chr11	55192321	55192440	*	0	0	32.792	NA	0	0	0	1190	41143	NM_009242	-	FALSE	0	0	68.1429	1
chr11.55241881.55242000	chr11	55241881	55242000	*	0	0	38.8976	NA	0	0	0	1191	-8300	NM_009242	-	FALSE	0	0	83.4286	3
chr11.55242001.55242120	chr11	55242001	55242120	*	0	0	38.3079	NA	0	0	0	1192	-8420	NM_009242	-	FALSE	0	0	70.2857	2
chr1.155261521.155261640	chr1	155261521	155261640	*	6.66134e-16	4.39546e-15	-26.58	NA	1	0	0	1193	-159	NR_033736	-	TRUE	0	0	76.4286	6
chr1.155262361.155262480	chr1	155262361	155262480	*	1.67805e-09	5.43274e-09	-27.3504	NA	1	0	0	1194	-999	NR_033736	-	TRUE	0	0	40	1
chr11.55315561.55315680	chr11	55315561	55315680	*	4.24161e-12	1.88399e-11	28.0565	NA	0	0	0	1195	19355	NR_028480	+	FALSE	0	0	50.8571	1
chr11.55316641.55316760	chr11	55316641	55316760	*	1.14819e-12	5.43207e-12	26.3002	NA	0	0	0	1196	20435	NR_028480	+	FALSE	0	0	31.1429	2
chr1.155341081.155341200	chr1	155341081	155341200	*	0	0	26.0718	NA	0	0	0	1197	-6292	NM_007842	-	FALSE	0	0	178.143	2
chr1.155341201.155341320	chr1	155341201	155341320	*	0	0	29.342	NA	0	0	0	1198	-6412	NM_007842	-	FALSE	0	0	176.857	3
chr11.55355761.55355880	chr11	55355761	55355880	*	4.97824e-13	2.45286e-12	31.5162	Glra1	0	0	1	1199	59555	NR_028480	+	FALSE	0	0	46.5714	1
chr1.155526241.155526360	chr1	155526241	155526360	*	0	0	27.1778	Rgs8	0	0	1	1200	26076	NM_026380	+	FALSE	0	0	194.286	1
chr1.155792401.155792520	chr1	155792401	155792520	*	2.13013e-10	7.72878e-10	32.3533	NA	0	0	0	1201	45328	NM_008131	+	FALSE	0	0	31.1429	1
chr1.155792521.155792640	chr1	155792521	155792640	*	0	0	30.9829	NA	0	0	0	1202	45448	NM_008131	+	FALSE	0	0	106.714	3
chr1.155997721.155997840	chr1	155997721	155997840	*	0	0	30.2685	NA	0	0	0	1203	-50477	NM_001204908	+	FALSE	0	0	143.143	1
chr11.5641921.5642040	chr11	5641921	5642040	*	2.93548e-09	9.20109e-09	27.9621	Urgcp	1	0	1	1204	-743	NM_178623	-	TRUE	0	1	36.2857	1
chr1.156508681.156508800	chr1	156508681	156508800	*	0	0	29.4338	Cacna1e	0	0	1	1205	64251	NM_009782	-	FALSE	0	0	113.714	3
chr1.156876361.156876480	chr1	156876361	156876480	*	0	0	-31.6611	NA	0	0	0	1206	70287	NM_010500	-	FALSE	0	0	213.857	8
chr1.156922201.156922320	chr1	156922201	156922320	*	0	0	45.3782	NA	0	0	0	1207	24447	NM_010500	-	FALSE	0	0	67.5714	1
chr1.156957241.156957360	chr1	156957241	156957360	*	0	0	29.3281	NA	0	0	0	1208	-10476	NM_010500	-	FALSE	0	0	160.714	7
chr1.157070161.157070280	chr1	157070161	157070280	*	0	0	-36.451	BC034090	0	0	0	1209	64330	NM_021433	+	FALSE	0	0	107.571	2
chr11.57604561.57604680	chr11	57604561	57604680	*	9.88098e-15	5.818e-14	26.3156	NA	0	0	0	1210	-10459	NM_001081168	+	FALSE	0	0	64.5714	2
chr1.157606561.157606680	chr1	157606561	157606680	*	0	0	34.6884	NA	0	0	0	1211	-17405	NM_010712	-	FALSE	0	0	135.429	4
chr11.5762521.5762640	chr11	5762521	5762640	*	0	0	27.7941	Aebp1	1	0	1	1212	654	NM_009636	+	TRUE	0	1	118.286	2
chr11.57835321.57835440	chr11	57835321	57835440	*	0	0	28.1507	Larp1	0	0	1	1213	12757	NM_028451	+	FALSE	0	0	75.1429	1
chr1.157842961.157843080	chr1	157842961	157843080	*	0	0	28.6337	NA	0	0	0	1214	-22577	NM_001039184	-	FALSE	0	0	78.7143	1
chr11.58037761.58037880	chr11	58037761	58037880	*	0	0	-29.9251	NA	0	0	0	1215	9284	NM_019440	+	FALSE	0	0	79.4286	2
chr11.58215961.58216080	chr11	58215961	58216080	*	8.8569e-08	2.26291e-07	25.4157	NA	0	0	0	1216	-18533	NM_027239	+	FALSE	0	0	37	1
chr11.58454761.58454880	chr11	58454761	58454880	*	0	0	-34.2643	Trim58	1	0	1	1217	796	NM_001039047	+	TRUE	0	1	150.429	2
chr1.158495641.158495760	chr1	158495641	158495760	*	1.55431e-15	9.92452e-15	36.6983	Abl2	0	0	1	1218	6725	NM_009595	+	FALSE	0	0	37.8571	1
chr1.158768881.158769000	chr1	158768881	158769000	*	1.50469e-12	7.02482e-12	25.4466	Ralgps2	1	0	1	1219	-154	NM_028333	+	TRUE	0	0	51.4286	2
chr11.58773481.58773600	chr11	58773481	58773600	*	0	0	30.0269	NA	0	0	0	1220	-3683	NM_031172	+	FALSE	0	1	241.714	10
chr1.159009841.159009960	chr1	159009841	159009960	*	0	0	28.1041	NA	0	0	0	1221	28817	NM_028540	-	FALSE	0	0	212.714	3
chr11.59198881.59199000	chr11	59198881	59199000	*	1.06949e-11	4.52934e-11	27.4226	NA	0	0	0	1222	-9727	NM_001045521	-	FALSE	0	0	53.2857	3
chr11.59245801.59245920	chr11	59245801	59245920	*	0	0	31.9429	Snap47	0	0	1	1223	17539	NM_144521	-	FALSE	0	0	98.7143	2
chr11.59272681.59272800	chr11	59272681	59272800	*	0	0	35.199	NA	0	0	0	1224	9136	NM_178659	+	FALSE	0	0	133.143	2
chr1.159370681.159370800	chr1	159370681	159370800	*	0	0	26.1057	NA	0	0	0	1225	-17913	NM_001033284	+	FALSE	0	0	125.143	4
chr1.159449641.159449760	chr1	159449641	159449760	*	3.55271e-15	2.18808e-14	26.2817	Sec16b	0	0	1	1226	-6541	NM_001159986	+	FALSE	0	0	76.5714	1
chr1.159456841.159456960	chr1	159456841	159456960	*	0	0	31.1208	Sec16b	1	0	1	1227	542	NM_001159986	+	TRUE	0	0	87.7143	1
chr11.59596561.59596680	chr11	59596561	59596680	*	0	0	28.2259	NA	0	0	0	1228	4480	NM_183139	-	FALSE	0	0	111.286	1
chr11.59624641.59624760	chr11	59624641	59624760	*	0	0	31.5007	LOC100504104	0	0	1	1229	1061	NR_045686	+	FALSE	0	1	81	1
chr11.59624761.59624880	chr11	59624761	59624880	*	0	0	28.6142	LOC100504104	0	0	1	1230	1181	NR_045686	+	FALSE	0	1	74.7143	1
chr11.59625001.59625120	chr11	59625001	59625120	*	0	0	33.2721	LOC100504104	0	0	1	1231	1421	NR_045686	+	FALSE	0	1	85.7143	1
chr11.59715481.59715600	chr11	59715481	59715600	*	0	0	26.9852	NA	0	0	0	1232	46050	NR_045273	-	FALSE	0	0	153.143	2
chr11.59715601.59715720	chr11	59715601	59715720	*	0	0	37.2272	NA	0	0	0	1233	45930	NR_045273	-	FALSE	0	0	234.714	3
chr11.59913121.59913240	chr11	59913121	59913240	*	1.11022e-16	7.76597e-16	-28.7689	NA	0	0	0	1234	-5275	NM_009021	+	FALSE	0	0	69	4
chr11.60153001.60153120	chr11	60153001	60153120	*	0	0	32.2407	Tom1l2	0	0	1	1235	13288	NM_153080	-	FALSE	0	0	63	2
chr11.6019201.6019320	chr11	6019201	6019320	*	0	0	28.826	Nudcd3	0	0	1	1236	-53451	NM_001174054	-	TRUE	0	0	121.857	2
chr11.6019321.6019440	chr11	6019321	6019440	*	1.11022e-16	7.76597e-16	26.9155	Nudcd3	0	0	1	1237	-53571	NM_001174054	-	TRUE	0	0	69.1429	3
chr11.60340081.60340200	chr11	60340081	60340200	*	0	0	37.343	Myo15	0	1	1	1238	-10985	NM_172943	+	FALSE	0	0	69.8571	2
chr1.160643761.160643880	chr1	160643761	160643880	*	0	0	30.4596	Pappa2	0	1	0	1239	208007	NR_030441	+	FALSE	0	0	282.714	2
chr1.16102081.16102200	chr1	16102081	16102200	*	0	0	34.3186	Rdh10	0	0	1	1240	6120	NM_133832	+	FALSE	0	0	97.2857	1
chr1.161065321.161065440	chr1	161065321	161065440	*	1.11022e-16	7.76597e-16	31.9895	NA	0	0	0	1241	-97017	NM_011931	+	FALSE	0	0	57.4286	3
chr11.61260841.61260960	chr11	61260841	61260960	*	9.99201e-16	6.49239e-15	30.6503	NA	0	0	0	1242	6429	NM_009548	-	FALSE	0	0	52.1429	1
chr11.61266721.61266840	chr11	61266721	61266840	*	0	0	-30.7587	Rnf112	1	0	1	1243	549	NM_009548	-	TRUE	0	0	84.1429	2
chr11.61306921.61307040	chr11	61306921	61307040	*	0	0	25.7709	Mapk7	1	0	1	1244	666	NM_011841	-	TRUE	1	1	93.8571	3
chr11.61487521.61487640	chr11	61487521	61487640	*	0	0	31.3694	Slc5a10	0	0	1	1245	-10272	NM_178618	+	FALSE	0	0	63.7143	1
chr11.61487761.61487880	chr11	61487761	61487880	*	0	0	28.6981	Slc5a10	0	0	1	1246	-10032	NM_178618	+	FALSE	0	0	273	2
chr1.161647081.161647200	chr1	161647081	161647200	*	0	0	34.6926	Tnr	0	0	1	1247	193183	NM_022312	+	FALSE	0	0	55.2857	1
chr11.61892641.61892760	chr11	61892641	61892760	*	0	0	-35.6878	Cytsb	0	0	1	1248	2044	NM_001029936	+	FALSE	0	1	57.2857	1
chr11.61962121.61962240	chr11	61962121	61962240	*	0	0	-26.7848	Cytsb	0	0	1	1249	71524	NM_001029936	+	FALSE	0	0	218	3
chr11.61962241.61962360	chr11	61962241	61962360	*	0	0	-27.0283	Cytsb	0	0	1	1250	71644	NM_001029936	+	FALSE	0	0	85.1429	1
chr11.61962361.61962480	chr11	61962361	61962480	*	0	0	-34.1906	Cytsb	0	0	1	1251	71764	NM_001029936	+	FALSE	0	0	87.1429	1
chr1.162198481.162198600	chr1	162198481	162198600	*	4.99489e-13	2.46073e-12	-27.1682	Rabgap1l	0	0	1	1252	-55459	NM_009786	-	FALSE	0	0	64.1429	1
chr1.162198601.162198720	chr1	162198601	162198720	*	0	0	-26.8302	Rabgap1l	0	0	1	1253	-55579	NM_009786	-	FALSE	0	0	132	2
chr1.162230161.162230280	chr1	162230161	162230280	*	0	0	-25.1606	Rabgap1l	0	0	1	1254	51423	NM_001038621	-	FALSE	0	0	118.286	3
chr1.162237361.162237480	chr1	162237361	162237480	*	0	0	-40.0106	Rabgap1l	0	0	1	1255	44223	NM_001038621	-	FALSE	0	0	66.4286	1
chr1.162237601.162237720	chr1	162237601	162237720	*	0	0	-25.9209	Rabgap1l	0	0	1	1256	43983	NM_001038621	-	FALSE	0	0	152.286	2
chr1.162237721.162237840	chr1	162237721	162237840	*	0	0	-30.7228	Rabgap1l	0	0	1	1257	43863	NM_001038621	-	FALSE	0	0	263.571	2
chr11.62308201.62308320	chr11	62308201	62308320	*	0	0	27.574	Pigl	0	0	1	1258	36241	NM_001039536	+	FALSE	0	0	81.2857	2
chr11.62308801.62308920	chr11	62308801	62308920	*	0	0	31.6667	Pigl	0	0	1	1259	36841	NM_001039536	+	FALSE	0	0	55.7143	4
chr11.62387761.62387880	chr11	62387761	62387880	*	4.14113e-14	2.29233e-13	-33.4976	NA	1	0	0	1260	-108	NM_011706	+	TRUE	0	0	35.4286	1
chr11.62390161.62390280	chr11	62390161	62390280	*	0	0	-26.9175	Trpv2	0	0	1	1261	2175	NM_011706	+	TRUE	0	0	139.143	3
chr11.62735041.62735160	chr11	62735041	62735160	*	1.11022e-16	7.76597e-16	25.3927	NA	0	0	0	1262	-29535	NM_025496	+	FALSE	0	0	85.1429	2
chr1.162761281.162761400	chr1	162761281	162761400	*	0	0	-25.654	NA	0	0	0	1263	-38213	NM_013862	-	FALSE	0	0	155.571	2
chr11.62853721.62853840	chr11	62853721	62853840	*	0	0	26.1506	NA	0	0	0	1264	-21321	NM_027660	+	FALSE	0	0	95.5714	3
chr1.162934441.162934560	chr1	162934441	162934560	*	0	0	33.3759	NA	0	0	0	1265	25706	NM_080844	+	FALSE	0	0	88	4
chr11.63164041.63164160	chr11	63164041	63164160	*	0	0	26.68	NA	0	0	0	1266	219031	NM_008885	+	FALSE	0	0	101.143	2
chr1.163198321.163198440	chr1	163198321	163198440	*	0	0	28.3776	NA	0	0	0	1267	-17025	NM_007453	-	FALSE	0	0	142.857	1
chr1.163198561.163198680	chr1	163198561	163198680	*	0	0	32.8093	NA	0	0	0	1268	-17265	NM_007453	-	FALSE	0	0	118.571	3
chr1.163643401.163643520	chr1	163643401	163643520	*	0	0	-27.8637	NA	0	0	0	1269	75107	NM_010177	-	FALSE	0	0	101.429	2
chr11.63731041.63731160	chr11	63731041	63731160	*	0	0	-26.2366	Hs3st3b1	0	0	1	1270	4627	NM_018805	-	FALSE	0	1	276.857	3
chr11.63813961.63814080	chr11	63813961	63814080	*	0	0	33.1733	Cox10	0	0	1	1271	-78176	NM_018805	-	FALSE	0	0	75.8571	1
chr11.6420241.6420360	chr11	6420241	6420360	*	0	0	-46.1347	Myo1g	1	0	1	1272	602	NM_178440	-	TRUE	0	0	74.1429	2
chr11.64331761.64331880	chr11	64331761	64331880	*	0	0	28.3488	Hs3st3a1	0	0	1	1273	-81586	NR_028445	-	FALSE	0	1	99	1
chr1.164479441.164479560	chr1	164479441	164479560	*	0	0	29.0091	NA	1	0	0	1274	-966	NM_144877	-	TRUE	0	1	75.4286	1
chr1.164495161.164495280	chr1	164495161	164495280	*	0	0	-27.1313	NA	0	0	0	1275	-5679	NM_016796	+	FALSE	0	0	115.714	1
chr1.164574361.164574480	chr1	164574361	164574480	*	0	0	42.3193	Myoc	0	0	1	1276	5082	NM_010865	+	FALSE	0	0	44.8571	1
chr1.164590321.164590440	chr1	164590321	164590440	*	1.37652e-11	5.75726e-11	25.4972	NA	0	0	0	1277	-1972	NM_001177581	-	FALSE	0	0	55.2857	1
chr11.65592841.65592960	chr11	65592841	65592960	*	0	0	27.8708	Map2k4	0	0	1	1278	8840	NM_009157	-	FALSE	0	0	92.5714	1
chr1.166004041.166004160	chr1	166004041	166004160	*	0	0	-28.5403	Sell	0	0	1	1279	11836	NM_001164059	+	FALSE	0	0	135.571	2
chr1.166004161.166004280	chr1	166004161	166004280	*	0	0	-26.9729	Sell	0	0	1	1280	11956	NM_001164059	+	FALSE	0	0	377.429	3
chr1.166296841.166296960	chr1	166296841	166296960	*	3.15303e-14	1.7664e-13	25.3724	Nme7	0	0	1	1281	59037	NM_178071	+	FALSE	0	0	76.5714	1
chr1.166644001.166644120	chr1	166644001	166644120	*	0	0	34.1021	NA	0	0	0	1282	-82743	NM_019759	+	FALSE	0	0	107.429	1
chr1.166829881.166830000	chr1	166829881	166830000	*	0	0	25.9969	NA	0	0	0	1283	35642	NM_008510	-	FALSE	0	0	248.857	2
chr1.166830001.166830120	chr1	166830001	166830120	*	0	0	25.2531	NA	0	0	0	1284	35522	NM_008510	-	FALSE	0	0	173.714	2
chr1.166924321.166924440	chr1	166924321	166924440	*	0	0	32.1907	NA	0	0	0	1285	-58681	NM_008510	-	FALSE	0	0	213	3
chr1.166924441.166924560	chr1	166924441	166924560	*	0	0	26.6076	NA	0	0	0	1286	-58801	NM_008510	-	FALSE	0	0	118.286	3
chr1.167213161.167213280	chr1	167213161	167213280	*	0	0	28.6118	NA	0	0	0	1287	-12617	NM_001081126	+	FALSE	0	1	116.286	3
chr1.167518081.167518200	chr1	167518081	167518200	*	0	0	31.9069	NA	0	0	0	1288	46473	NM_001083897	-	FALSE	0	0	125.143	2
chr1.167546761.167546880	chr1	167546761	167546880	*	0	0	25.0441	Mpzl1	0	0	1	1289	17793	NM_001083897	-	FALSE	0	0	150.714	1
chr1.167546881.167547000	chr1	167546881	167547000	*	0	0	26.9519	Mpzl1	0	0	1	1290	17673	NM_001083897	-	FALSE	0	0	285.143	2
chr1.167547121.167547240	chr1	167547121	167547240	*	0	0	29.4223	Mpzl1	0	0	1	1291	17433	NM_001083897	-	FALSE	0	0	221.571	2
chr1.167547481.167547600	chr1	167547481	167547600	*	0	0	25.9557	Mpzl1	0	0	1	1292	17073	NM_001083897	-	FALSE	0	0	414.143	3
chr1.167547961.167548080	chr1	167547961	167548080	*	2.74891e-12	1.2478e-11	25.9568	Mpzl1	0	0	1	1293	16593	NM_001083897	-	FALSE	0	0	62	2
chr1.167597521.167597640	chr1	167597521	167597640	*	0	0	26.0886	Rcsd1	0	0	1	1294	-32850	NM_001001880	-	FALSE	0	0	240.143	5
chr1.167609761.167609880	chr1	167609761	167609880	*	0	0	37.1458	Rcsd1	0	0	1	1295	28346	NM_178593	-	FALSE	0	0	88.4286	3
chr1.167637361.167637480	chr1	167637361	167637480	*	0	0	-28.4484	Rcsd1	1	0	1	1296	746	NM_178593	-	TRUE	0	1	128.571	3
chr1.167639881.167640000	chr1	167639881	167640000	*	0	0	-35.8567	LOC100503283	0	0	0	1297	-1657	NM_001038846	-	TRUE	0	1	275.857	4
chr1.167648761.167648880	chr1	167648761	167648880	*	8.21565e-15	4.87791e-14	-28.9082	NA	0	0	0	1298	-10537	NM_001038846	-	FALSE	0	0	59.1429	2
chr1.167915881.167916000	chr1	167915881	167916000	*	0	0	-32.5733	Pou2f1	0	0	1	1299	16766	NM_011137	-	FALSE	0	0	49.2857	1
chr11.68099881.68100000	chr11	68099881	68100000	*	0	0	29.9754	Ntn1	0	0	1	1300	100329	NM_008744	-	FALSE	0	0	81.5714	1
chr11.68134681.68134800	chr11	68134681	68134800	*	2.40419e-12	1.09766e-11	30.8597	Ntn1	0	0	1	1301	65529	NM_008744	-	FALSE	0	0	46.5714	1
chr11.68244721.68244840	chr11	68244721	68244840	*	0	0	-31.0075	NA	1	0	0	1302	-787	NM_177320	+	TRUE	0	1	100.571	2
chr11.68530801.68530920	chr11	68530801	68530920	*	0	0	26.7106	Myh10	0	0	1	1303	25386	NM_175260	+	FALSE	0	0	256.571	2
chr11.68720161.68720280	chr11	68720161	68720280	*	0	0	26.5442	NA	0	0	0	1304	5072	NR_003373	+	FALSE	0	0	138.286	2
chr11.68903761.68903880	chr11	68903761	68903880	*	0	0	26.4488	Vamp2	0	0	1	1305	1733	NM_009497	+	FALSE	0	1	222.857	3
chr11.68947201.68947320	chr11	68947201	68947320	*	2.22045e-16	1.52189e-15	25.0656	Aloxe3	0	0	1	1306	7324	NM_011786	+	FALSE	0	1	97.4286	3
chr11.69135601.69135720	chr11	69135601	69135720	*	0	0	-27.5194	Cntrob	0	0	1	1307	1656	NM_172560	-	FALSE	0	1	52	1
chr11.69178081.69178200	chr11	69178081	69178200	*	0	0	26.0432	Chd3	0	1	1	1308	4729	NM_146019	-	FALSE	0	0	143.857	2
chr11.69178201.69178320	chr11	69178201	69178320	*	0	0	29.2468	Chd3	0	1	1	1309	4609	NM_146019	-	FALSE	0	0	316.143	5
chr11.69178921.69179040	chr11	69178921	69179040	*	0	0	26.5952	Chd3	0	0	1	1310	3889	NM_146019	-	FALSE	0	0	153	3
chr11.69211681.69211800	chr11	69211681	69211800	*	0	0	33.5954	Tmem88	1	1	0	1311	0	NM_025915	-	TRUE	0	1	86.7143	9
chr11.69503041.69503160	chr11	69503041	69503160	*	8.17531e-10	2.75643e-09	28.4712	c("LOC100503827", "Tnfsf12-Tnfsf13", "Tnfsf12")	0	0	1	1312	-3986	NM_023517	-	FALSE	0	0	40.4286	1
chr11.69508201.69508320	chr11	69508201	69508320	*	0	0	28.0312	c("Tnfsf12-Tnfsf13", "Tnfsf12")	0	1	1	1313	1281	NM_001159503	-	FALSE	0	0	82.7143	2
chr11.69508561.69508680	chr11	69508561	69508680	*	0	0	29.3771	c("Tnfsf12-Tnfsf13", "Tnfsf12")	1	0	1	1314	921	NM_001159503	-	TRUE	0	0	430.714	2
chr11.69508681.69508800	chr11	69508681	69508800	*	0	0	30.8394	c("Tnfsf12-Tnfsf13", "Tnfsf12")	1	0	1	1315	801	NM_001159503	-	TRUE	0	0	582.286	3
chr11.69508801.69508920	chr11	69508801	69508920	*	0	0	34.1637	c("Tnfsf12-Tnfsf13", "Tnfsf12")	1	1	1	1316	681	NM_001159503	-	TRUE	0	0	146.571	5
chr11.69528241.69528360	chr11	69528241	69528360	*	0	0	28.3677	NA	0	0	0	1317	-18642	NM_001034097	-	FALSE	0	0	86.2857	6
chr11.69580681.69580800	chr11	69580681	69580800	*	0	0	39.8336	Zbtb4	0	0	1	1318	1269	NM_029348	+	FALSE	0	1	126.143	3
chr11.69581161.69581280	chr11	69581161	69581280	*	0	0	30.5162	Zbtb4	0	0	1	1319	1749	NM_029348	+	FALSE	0	1	144.571	2
chr11.69647401.69647520	chr11	69647401	69647520	*	0	0	-29.8126	Nlgn2	1	1	1	1320	832	NM_198862	-	TRUE	0	1	157.143	6
chr11.69647521.69647640	chr11	69647521	69647640	*	0	0	-30.2625	Nlgn2	1	1	0	1321	712	NM_198862	-	TRUE	1	1	136.429	10
chr11.69689401.69689520	chr11	69689401	69689520	*	0	0	33.6188	NA	0	0	0	1322	2001	NM_001195710	-	FALSE	0	0	143	2
chr11.69700801.69700920	chr11	69700801	69700920	*	0	0	34.5851	Centb1	0	0	1	1323	-6315	NM_153143	-	FALSE	0	0	50.4286	1
chr11.69750481.69750600	chr11	69750481	69750600	*	0	0	32.235	Ybx2	0	0	1	1324	1082	NM_016875	+	FALSE	0	1	92.2857	2
chr11.69841801.69841920	chr11	69841801	69841920	*	1.0425e-13	5.53492e-13	26.232	Dlg4	0	0	1	1325	9696	NM_007864	+	FALSE	0	1	70.1429	2
chr11.69909361.69909480	chr11	69909361	69909480	*	0	0	27.0807	Asgr2	0	0	1	1326	3217	NM_007493	+	FALSE	0	0	78	2
chr11.70041961.70042080	chr11	70041961	70042080	*	1.0103e-14	5.94233e-14	27.1767	Bcl6b	0	1	1	1327	1221	NM_007528	-	FALSE	0	1	57.7143	4
chr11.70050121.70050240	chr11	70050121	70050240	*	8.80407e-14	4.71039e-13	32.1314	0610010K14Rik	0	0	1	1328	1177	NM_026757	-	FALSE	0	1	44.2857	1
chr1.170155681.170155800	chr1	170155681	170155800	*	0	0	-27.2877	Pbx1	0	0	1	1329	206590	NM_008783	-	FALSE	0	0	155.143	2
chr1.170217961.170218080	chr1	170217961	170218080	*	0	0	28.0168	Pbx1	0	0	1	1330	144310	NM_008783	-	FALSE	0	0	92.7143	2
chr11.70251001.70251120	chr11	70251001	70251120	*	0	0	-31.5402	Arrb2	0	1	1	1331	4921	NM_001271358	+	FALSE	0	0	69.7143	1
chr11.70279561.70279680	chr11	70279561	70279680	*	0	0	26.6902	Zmynd15	0	1	0	1332	-6076	NM_023158	-	FALSE	1	1	125.429	9
chr11.70333921.70334040	chr11	70333921	70334040	*	0	0	40.5943	Gltpd2	0	1	0	1333	1212	NM_146020	+	FALSE	1	1	95.5714	10
chr11.70398961.70399080	chr11	70398961	70399080	*	0	0	32.3131	Mink1	0	0	1	1334	22580	NM_001045959	+	FALSE	0	0	86.7143	2
chr11.70399081.70399200	chr11	70399081	70399200	*	0	0	26.6309	Mink1	0	0	1	1335	22700	NM_001045959	+	FALSE	0	0	77.7143	3
chr11.70464481.70464600	chr11	70464481	70464600	*	6.66134e-16	4.39546e-15	-26.4908	Rnf167	0	1	0	1336	3392	NM_027445	+	FALSE	0	0	79.4286	3
chr11.70515241.70515360	chr11	70515241	70515360	*	3.88578e-15	2.38424e-14	26.3451	Kif1c	0	0	1	1337	1193	NM_153103	+	FALSE	0	1	59.7143	1
chr11.70515361.70515480	chr11	70515361	70515480	*	2.22045e-16	1.52189e-15	28.0509	Kif1c	0	0	1	1338	1313	NM_153103	+	FALSE	0	1	59.8571	1
chr11.70534321.70534440	chr11	70534321	70534440	*	0	0	-35.8538	Kif1c	0	0	1	1339	20273	NM_153103	+	FALSE	0	0	58.2857	1
chr11.70617361.70617480	chr11	70617361	70617480	*	0	0	-30.815	A430084P05Rik	0	0	1	1340	8584	NM_001045526	-	FALSE	0	0	95	1
chr11.70657681.70657800	chr11	70657681	70657800	*	0	0	25.3295	NA	1	0	0	1341	-465	NM_019400	+	TRUE	0	1	121.714	2
chr11.70685521.70685640	chr11	70685521	70685640	*	7.77156e-16	5.09818e-15	25.9168	c("Rabep1", "LOC100503922")	0	0	1	1342	27258	NM_019400	+	FALSE	0	0	77.7143	1
chr11.71891761.71891880	chr11	71891761	71891880	*	0	0	27.6651	Pitpnm3	0	0	1	1343	35759	NM_144526	+	FALSE	0	0	99.5714	2
chr1.172077841.172077960	chr1	172077841	172077960	*	4.46421e-13	2.21275e-12	-25.0806	Uap1	0	0	1	1344	27118	NM_133806	-	FALSE	0	0	70.5714	1
chr11.72231841.72231960	chr11	72231841	72231960	*	0	0	33.534	NA	0	0	0	1345	-6627	NM_177776	-	FALSE	0	0	73.5714	4
chr11.72260281.72260400	chr11	72260281	72260400	*	0	0	-29.5172	Mybbp1a	0	0	1	1346	5403	NM_016776	+	FALSE	0	0	77.8571	1
chr11.72272281.72272400	chr11	72272281	72272400	*	5.36793e-13	2.63463e-12	29.6026	Spns2	0	0	1	1347	16130	NM_001276383	-	FALSE	0	0	41.7143	1
chr11.72279961.72280080	chr11	72279961	72280080	*	5.55112e-15	3.35282e-14	-30.2008	Spns2	0	0	1	1348	8450	NM_001276383	-	FALSE	0	0	47.2857	2
chr11.72355441.72355560	chr11	72355441	72355560	*	0	0	27.5182	Spns3	0	0	1	1349	8189	NM_029932	-	FALSE	0	0	169.714	4
chr11.72363481.72363600	chr11	72363481	72363600	*	0	0	-34.1284	Spns3	1	1	1	1350	149	NM_029932	-	TRUE	0	0	53.5714	2
chr11.72363841.72363960	chr11	72363841	72363960	*	0	0	-26.1482	NA	1	0	0	1351	-94	NM_029932	-	TRUE	0	0	133.286	3
chr1.172469761.172469880	chr1	172469761	172469880	*	0	0	-33.1733	Nos1ap	0	0	1	1352	17362	NM_027528	-	FALSE	0	0	56.4286	1
chr1.172469881.172470000	chr1	172469881	172470000	*	0	0	-32.9103	Nos1ap	0	0	1	1353	17242	NM_027528	-	FALSE	0	0	74	1
chr11.72501721.72501840	chr11	72501721	72501840	*	0	0	29.7624	NA	0	0	0	1354	-1664	NM_009671	+	FALSE	0	1	233.286	3
chr1.172540081.172540200	chr1	172540081	172540200	*	3.052e-13	1.54057e-12	-27.1671	NA	0	0	0	1355	-20102	NM_001109985	-	FALSE	0	0	63	3
chr11.72548521.72548640	chr11	72548521	72548640	*	0	0	34.0623	Ankfy1	0	0	1	1356	45019	NM_009671	+	FALSE	0	0	120.571	2
chr1.172581481.172581600	chr1	172581481	172581600	*	0	0	29.094	Olfml2b	0	0	1	1357	6820	NM_177068	+	FALSE	0	0	99.1429	1
chr11.72585121.72585240	chr11	72585121	72585240	*	0	0	30.2763	Ankfy1	0	1	0	1358	24102	NM_001024926	-	FALSE	0	0	102	1
chr11.72767641.72767760	chr11	72767641	72767760	*	2.22045e-16	1.52189e-15	-27.3804	NA	0	0	0	1359	-6911	NM_016745	+	FALSE	0	0	79.2857	1
chr1.172827241.172827360	chr1	172827241	172827360	*	0	0	-34.5084	NA	0	0	0	1360	-11571	NM_023173	-	FALSE	0	0	117.857	2
chr11.72829441.72829560	chr11	72829441	72829560	*	0	0	39.1812	NA	0	0	0	1361	-2950	NM_018883	+	FALSE	0	0	45.5714	1
chr1.172854841.172854960	chr1	172854841	172854960	*	0	0	-32.9225	Fcrla	0	0	1	1362	2755	NM_001160215	-	FALSE	0	0	101.286	3
chr1.172897801.172897920	chr1	172897801	172897920	*	2.57552e-08	7.10285e-08	-28.5505	Fcgr2b	0	0	1	1363	8283	NM_010187	-	FALSE	0	0	33.1429	1
chr11.73014601.73014720	chr11	73014601	73014720	*	7.07878e-13	3.42592e-12	29.0347	Shpk	0	0	1	1364	1619	NM_029031	+	FALSE	0	1	52.5714	1
chr11.73137841.73137960	chr11	73137841	73137960	*	0	0	27.525	Aspa	1	1	0	1365	180	NM_023113	-	TRUE	0	0	261	2
chr1.173181361.173181480	chr1	173181361	173181480	*	0	0	31.9201	Adamts4	1	1	0	1366	810	NM_172845	+	TRUE	0	0	207.857	6
chr1.173274481.173274600	chr1	173274481	173274600	*	0	0	25.1114	Nit1	0	1	0	1367	1177	NM_012049	-	FALSE	0	1	111.286	2
chr1.173318881.173319000	chr1	173318881	173319000	*	0	0	-26.8769	NA	1	0	0	1368	-91	NM_001005508	+	TRUE	0	0	225.714	3
chr1.173319361.173319480	chr1	173319361	173319480	*	0	0	-28.6894	Arhgap30	1	1	0	1369	272	NM_001005508	+	TRUE	0	0	114.571	4
chr1.173319481.173319600	chr1	173319481	173319600	*	0	0	-30.2555	Arhgap30	1	1	1	1370	392	NM_001005508	+	TRUE	0	0	189.143	5
chr1.173320081.173320200	chr1	173320081	173320200	*	0	0	-32.7346	Arhgap30	1	0	1	1371	992	NM_001005508	+	TRUE	0	0	101	2
chr1.173355481.173355600	chr1	173355481	173355600	*	0	0	32.2654	NA	0	0	0	1372	6319	NM_001164525	+	FALSE	0	0	61.1429	2
chr1.173611321.173611440	chr1	173611321	173611440	*	0	0	-33.044	NA	1	0	0	1373	-746	NM_007649	+	TRUE	0	1	165.714	1
chr1.173611441.173611560	chr1	173611441	173611560	*	0	0	-28.8886	NA	1	0	0	1374	-626	NM_007649	+	TRUE	0	1	298.286	2
chr1.173611681.173611800	chr1	173611681	173611800	*	0	0	-26.1239	NA	1	0	0	1375	-386	NM_007649	+	TRUE	0	1	99	1
chr1.173615161.173615280	chr1	173615161	173615280	*	0	0	-29.6911	Cd48	0	0	1	1376	2977	NM_007649	+	FALSE	0	0	150	3
chr1.173718841.173718960	chr1	173718841	173718960	*	0	0	-31.6448	Slamf1	0	0	1	1377	21580	NM_013730	+	FALSE	0	0	112.286	2
chr1.173770681.173770800	chr1	173770681	173770800	*	0	0	-31.0971	Cd84	1	1	1	1378	855	NM_001252472	+	TRUE	0	0	295.714	2
chr1.173775241.173775360	chr1	173775241	173775360	*	4.42535e-13	2.19477e-12	-27.4011	Cd84	0	0	1	1379	5415	NM_001252472	+	FALSE	0	0	58	1
chr1.173847721.173847840	chr1	173847721	173847840	*	0	0	-27.9736	Slamf6	1	1	0	1380	55	NM_030710	+	TRUE	0	0	167.286	2
chr1.173848321.173848440	chr1	173848321	173848440	*	1.67499e-12	7.77627e-12	-29.0817	Slamf6	1	0	1	1381	655	NM_030710	+	TRUE	0	0	48.1429	1
chr1.173851801.173851920	chr1	173851801	173851920	*	2.20985e-11	9.02685e-11	-26.5874	Slamf6	0	0	1	1382	4135	NM_030710	+	FALSE	0	0	51.5714	1
chr1.174057721.174057840	chr1	174057721	174057840	*	8.1374e-11	3.10311e-10	28.7247	c("LOC100504176", "Pex19")	1	0	1	1383	837	NM_023041	+	TRUE	0	0	40.8571	2
chr1.174133681.174133800	chr1	174133681	174133800	*	1.44329e-15	9.24501e-15	33.549	Pea15a	0	0	1	1384	3113	NM_011063	-	FALSE	0	0	44	1
chr1.174134761.174134880	chr1	174134761	174134880	*	0	0	26.587	Pea15a	0	0	1	1385	2033	NM_011063	-	FALSE	0	0	112.857	2
chr1.174137281.174137400	chr1	174137281	174137400	*	6.66134e-15	3.9909e-14	25.3445	NA	1	0	0	1386	-370	NM_011063	-	TRUE	0	0	70.2857	2
chr1.174146881.174147000	chr1	174146881	174147000	*	0	0	25.9347	Casq1	0	1	1	1387	3027	NM_009813	-	FALSE	0	0	175	2
chr1.174280921.174281040	chr1	174280921	174281040	*	0	0	35.5331	Kcnj10	0	0	1	1388	9582	NM_001039484	+	FALSE	0	0	64.1429	2
chr11.74362441.74362560	chr11	74362441	74362560	*	0	0	31.0733	Rap1gap2	0	0	1	1389	41101	NM_001015046	-	FALSE	0	0	268.143	3
chr11.74385961.74386080	chr11	74385961	74386080	*	1.11022e-16	7.76597e-16	-27.8437	Rap1gap2	0	0	1	1390	17581	NM_001015046	-	FALSE	0	0	77.5714	2
chr11.74386081.74386200	chr11	74386081	74386200	*	0	0	-30.3605	Rap1gap2	0	0	1	1391	17461	NM_001015046	-	FALSE	0	0	126	3
chr1.174443641.174443760	chr1	174443641	174443760	*	3.21965e-15	1.99164e-14	-26.0528	NA	0	0	0	1392	-7501	NM_027972	+	FALSE	0	0	74.2857	2
chr11.74577841.74577960	chr11	74577841	74577960	*	1.23457e-13	6.50568e-13	33.1079	NA	0	0	0	1393	-6405	NM_026197	+	FALSE	0	0	38.2857	1
chr11.74695081.74695200	chr11	74695081	74695200	*	0	0	26.9892	Sgsm2	0	0	1	1394	15383	NM_197943	-	FALSE	0	0	130.286	3
chr11.74868121.74868240	chr11	74868121	74868240	*	0	0	26.2286	Smg6	0	0	1	1395	11254	NR_030454	-	FALSE	0	0	61	1
chr11.74947561.74947680	chr11	74947561	74947680	*	0	0	28.8399	Smg6	0	0	1	1396	33975	NM_001098203	-	FALSE	0	0	86.1429	1
chr11.74947681.74947800	chr11	74947681	74947800	*	0	0	42.3751	Smg6	0	0	1	1397	33855	NM_001098203	-	FALSE	0	0	77.7143	1
chr11.75242641.75242760	chr11	75242641	75242760	*	0	0	-26.4566	NA	0	0	0	1398	-6517	NM_011340	-	FALSE	0	0	375.857	3
chr11.75270001.75270120	chr11	75270001	75270120	*	0	0	-25.8189	NA	0	0	0	1399	-1783	NM_138950	-	FALSE	0	1	77	1
chr11.75323401.75323520	chr11	75323401	75323520	*	0	0	27.8799	NA	1	0	0	1400	-76	NM_001029938	+	TRUE	0	1	50.7143	1
chr11.75324481.75324600	chr11	75324481	75324600	*	0	0	33.38	Rilp	1	1	1	1401	887	NM_001029938	+	TRUE	0	1	162.571	4
chr11.75324841.75324960	chr11	75324841	75324960	*	0	0	33.4759	Rilp	0	1	1	1402	1247	NM_001029938	+	FALSE	0	1	157.714	4
chr11.75347041.75347160	chr11	75347041	75347160	*	0	0	-28.7886	Slc43a2	0	0	1	1403	1429	NM_001199283	+	FALSE	0	1	71	1
chr11.75461521.75461640	chr11	75461521	75461640	*	0	0	27.9782	Inpp5k	0	1	0	1404	-3371	NM_008659	+	FALSE	0	0	169.857	1
chr11.75582241.75582360	chr11	75582241	75582360	*	1.91736e-13	9.90031e-13	28.7836	NA	0	0	0	1405	27200	NM_007873	-	FALSE	0	0	53.8571	2
chr11.76076521.76076640	chr11	76076521	76076640	*	0	0	27.9413	Nxn	0	1	0	1406	19285	NM_183263	+	FALSE	0	0	121	8
chr1.176089441.176089560	chr1	176089441	176089560	*	0	0	-32.0276	Olfr420	1	1	0	1407	590	NM_146305	+	TRUE	0	0	312.143	4
chr11.76176841.76176960	chr11	76176841	76176960	*	0	0	46.1521	Nxn	0	0	1	1408	35684	NM_008750	-	FALSE	0	0	53.4286	3
chr11.76177081.76177200	chr11	76177081	76177200	*	0	0	34.3444	Nxn	0	0	1	1409	35444	NM_008750	-	FALSE	0	0	65.1429	1
chr11.76177201.76177320	chr11	76177201	76177320	*	0	0	33.731	Nxn	0	0	1	1410	35324	NM_008750	-	FALSE	0	0	87.1429	2
chr11.76177441.76177560	chr11	76177441	76177560	*	0	0	33.0035	Nxn	0	0	1	1411	35084	NM_008750	-	FALSE	0	0	74.5714	2
chr11.76188121.76188240	chr11	76188121	76188240	*	0	0	41.9112	Nxn	0	0	1	1412	24404	NM_008750	-	FALSE	0	0	68.1429	3
chr11.76188241.76188360	chr11	76188241	76188360	*	0	0	27.1754	Nxn	0	0	1	1413	24284	NM_008750	-	FALSE	0	0	161.857	4
chr11.76188481.76188600	chr11	76188481	76188600	*	0	0	30.3065	Nxn	0	0	1	1414	24044	NM_008750	-	FALSE	0	0	80.2857	2
chr11.76270561.76270680	chr11	76270561	76270680	*	0	0	-31.2006	Abr	0	0	1	1415	49894	NM_023355	+	FALSE	0	0	392	4
chr11.76270681.76270800	chr11	76270681	76270800	*	0	0	-25.6799	Abr	0	0	1	1416	50014	NM_023355	+	FALSE	0	0	179.571	4
chr11.76425841.76425960	chr11	76425841	76425960	*	7.81597e-14	4.20434e-13	30.7026	NA	0	0	0	1417	-34613	NM_198894	-	FALSE	0	0	48.1429	2
chr11.76673041.76673160	chr11	76673041	76673160	*	1.77636e-15	1.1269e-14	-25.0325	NA	0	0	0	1418	-12532	NM_007754	-	FALSE	0	0	85.7143	1
chr11.76946401.76946520	chr11	76946401	76946520	*	3.62277e-12	1.62178e-11	25.1522	Efcab5	0	0	1	1419	-54463	NM_001012309	-	FALSE	0	0	60.7143	1
chr11.77200081.77200200	chr11	77200081	77200200	*	0	0	-27.6605	Ssh2	0	0	1	1420	-77215	NM_139130	+	FALSE	0	0	68.2857	1
chr11.77258521.77258640	chr11	77258521	77258640	*	7.51901e-11	2.87972e-10	25.5864	Ssh2	0	0	1	1421	-18775	NM_139130	+	FALSE	0	0	46.5714	1
chr11.77311321.77311440	chr11	77311321	77311440	*	0	0	31.0694	Git1	0	0	1	1422	4409	NM_001004144	+	FALSE	0	0	82.2857	1
chr1.177455161.177455280	chr1	177455161	177455280	*	6.04625e-11	2.34464e-10	-27.3576	NA	0	0	0	1423	-32486	NM_011880	-	FALSE	0	0	51.1429	1
chr1.177467281.177467400	chr1	177467281	177467400	*	0	0	27.1638	NA	0	0	0	1424	-44606	NM_011880	-	FALSE	0	0	87.4286	2
chr1.177561961.177562080	chr1	177561961	177562080	*	0	0	-31.9678	NA	1	0	0	1425	-244	NM_133809	+	TRUE	0	0	143.857	3
chr11.77576401.77576520	chr11	77576401	77576520	*	0	0	25.9166	NA	0	0	0	1426	-14247	NM_011586	+	TRUE	0	1	273.286	3
chr11.77598961.77599080	chr11	77598961	77599080	*	1.53988e-13	8.03559e-13	31.7634	c("Myo18a", "Gm10277")	0	0	1	1427	8196	NM_011586	+	FALSE	0	0	46.8571	2
chr11.77845201.77845320	chr11	77845201	77845320	*	0	0	31.5018	LOC100504178	1	0	0	1428	-495	NM_183286	+	TRUE	0	1	75.2857	2
chr11.77982841.77982960	chr11	77982841	77982960	*	0	0	-31.9056	Nek8	0	1	1	1429	-3790	NM_009423	-	FALSE	0	0	76.7143	6
chr11.78158161.78158280	chr11	78158161	78158280	*	0	0	32.5147	Unc119	0	0	1	1430	1139	NM_011676	+	FALSE	0	1	85.1429	2
chr11.78158281.78158400	chr11	78158281	78158400	*	0	0	32.1715	Unc119	0	0	1	1431	1259	NM_011676	+	FALSE	0	1	84.4286	2
chr11.78210601.78210720	chr11	78210601	78210720	*	1.39345e-10	5.16824e-10	26.9197	Gm11194	0	0	1	1432	2616	NR_003282	+	FALSE	0	1	49.8571	3
chr11.78380281.78380400	chr11	78380281	78380400	*	0	0	30.3128	NA	0	0	0	1433	-16045	NM_133706	-	FALSE	0	0	119.714	2
chr11.78380401.78380520	chr11	78380401	78380520	*	0	0	25.2491	NA	0	0	0	1434	-16165	NM_133706	-	FALSE	0	0	135.857	2
chr11.78380641.78380760	chr11	78380641	78380760	*	0	0	27.1718	Nlk	0	1	0	1435	-16405	NM_133706	-	FALSE	0	0	359.571	4
chr11.78617161.78617280	chr11	78617161	78617280	*	0	0	30.645	NA	0	0	0	1436	-22817	NM_001076681	+	FALSE	0	0	574.143	4
chr11.78617281.78617400	chr11	78617281	78617400	*	0	0	28.6894	NA	0	0	0	1437	-22697	NM_001076681	+	FALSE	0	0	322.286	4
chr11.78621361.78621480	chr11	78621361	78621480	*	0	0	30.2788	NA	0	0	0	1438	-18617	NM_001076681	+	FALSE	0	0	66	1
chr1.178742641.178742760	chr1	178742641	178742760	*	0	0	30.2636	NA	0	0	0	1439	-2183	NM_029756	+	FALSE	0	1	108.857	1
chr11.78816121.78816240	chr11	78816121	78816240	*	5.77982e-13	2.82461e-12	30.1612	NA	0	0	0	1440	-17696	NM_010708	-	FALSE	0	0	46.1429	1
chr11.78819361.78819480	chr11	78819361	78819480	*	1.75593e-12	8.13145e-12	-25.7865	NA	0	0	0	1441	-17619	NR_045873	+	FALSE	0	0	57.7143	1
chr11.78885121.78885240	chr11	78885121	78885240	*	0	0	26.1361	Ksr1	0	0	1	1442	48024	NR_045873	+	FALSE	0	0	111.286	3
chr11.78901921.78902040	chr11	78901921	78902040	*	0	0	-41.9096	Ksr1	0	0	1	1443	57817	NM_013571	-	FALSE	0	0	114.143	4
chr1.178923481.178923600	chr1	178923481	178923600	*	0	0	-28.5253	Sdccag8	0	0	1	1444	-157218	NR_037996	-	FALSE	0	0	195.571	2
chr11.78966241.78966360	chr11	78966241	78966360	*	0	0	-36.7195	NA	0	0	0	1445	-6386	NM_013571	-	FALSE	0	0	170.714	1
chr11.79038481.79038600	chr11	79038481	79038600	*	0	0	32.2426	NA	0	0	0	1446	17927	NM_001042565	-	FALSE	0	0	227.571	6
chr1.179298121.179298240	chr1	179298121	179298240	*	1.11022e-16	7.76597e-16	-28.5987	NA	0	0	0	1447	-76552	NM_001012330	+	FALSE	0	0	62.2857	1
chr11.79335961.79336080	chr11	79335961	79336080	*	0	0	-26.971	c("Nf1", "Evi2b")	0	0	1	1448	1185	NM_001077496	-	FALSE	0	0	106	1
chr11.79337401.79337520	chr11	79337401	79337520	*	0	0	-32.1262	c("Nf1", "Evi2b")	1	0	1	1449	-138	NM_001077496	-	TRUE	0	0	89.2857	1
chr11.79337521.79337640	chr11	79337521	79337640	*	0	0	-31.1748	c("Nf1", "Evi2b")	1	0	1	1450	-258	NM_001077496	-	TRUE	0	0	92	1
chr11.79337641.79337760	chr11	79337641	79337760	*	0	0	-32.1198	c("Nf1", "Evi2b")	1	0	1	1451	-378	NM_001077496	-	TRUE	0	0	91.2857	1
chr11.79340401.79340520	chr11	79340401	79340520	*	0	0	-26.3441	c("Nf1", "Evi2b", "Evi2a")	0	1	1	1452	-3138	NM_001077496	-	FALSE	0	0	221.429	2
chr11.79341001.79341120	chr11	79341001	79341120	*	0	0	-31.0266	c("Nf1", "Evi2b", "Evi2a")	0	1	1	1453	2972	NM_146023	-	FALSE	0	0	223.286	3
chr11.79341121.79341240	chr11	79341121	79341240	*	0	0	-30.5169	c("Nf1", "Evi2b", "Evi2a")	0	1	1	1454	2852	NM_146023	-	FALSE	0	0	328.571	3
chr11.79341601.79341720	chr11	79341601	79341720	*	0	0	-27.6261	c("Nf1", "Evi2b", "Evi2a")	0	1	1	1455	2372	NM_146023	-	FALSE	0	0	111.714	1
chr11.79341841.79341960	chr11	79341841	79341960	*	0	0	-25.9725	c("Nf1", "Evi2b", "Evi2a")	0	1	1	1456	2132	NM_146023	-	FALSE	0	0	126.714	2
chr11.79526761.79526880	chr11	79526761	79526880	*	0	0	28.6573	NA	0	0	0	1457	1292	NR_029579	+	FALSE	0	1	258.143	5
chr11.79527121.79527240	chr11	79527121	79527240	*	0	0	27.2876	NA	0	0	0	1458	1652	NR_029579	+	FALSE	0	1	95.1429	2
chr11.79530601.79530720	chr11	79530601	79530720	*	2.38698e-14	1.3537e-13	25.8913	NA	0	0	0	1459	5132	NR_029579	+	FALSE	0	0	70.7143	2
chr11.79532641.79532760	chr11	79532641	79532760	*	1.55431e-15	9.92452e-15	30.9567	NA	0	0	0	1460	-7142	NR_029959	+	FALSE	0	0	54.2857	1
chr11.79537081.79537200	chr11	79537081	79537200	*	0	0	32.4931	NA	0	0	0	1461	-2702	NR_029959	+	FALSE	0	0	65.5714	2
chr11.79543561.79543680	chr11	79543561	79543680	*	0	0	34.2626	NA	0	0	0	1462	3661	NR_029959	+	FALSE	0	0	159.429	5
chr11.79603681.79603800	chr11	79603681	79603800	*	0	0	-26.6596	NA	0	0	0	1463	63781	NR_029959	+	FALSE	0	0	93.4286	1
chr11.79645321.79645440	chr11	79645321	79645440	*	0	0	30.9914	NA	0	0	0	1464	105421	NR_029959	+	FALSE	0	0	71.2857	2
chr11.79656481.79656600	chr11	79656481	79656600	*	3.54938e-13	1.77843e-12	28.1352	NA	0	0	0	1465	116581	NR_029959	+	FALSE	0	0	58.5714	1
chr11.79885681.79885800	chr11	79885681	79885800	*	0	0	-31.6878	Crlf3	0	0	1	1466	8658	NM_018776	-	FALSE	0	0	64.2857	1
chr11.79885921.79886040	chr11	79885921	79886040	*	0	0	-30.2242	Crlf3	0	0	1	1467	8418	NM_018776	-	FALSE	0	0	86.5714	3
chr11.79889281.79889400	chr11	79889281	79889400	*	0	0	-36.2433	Crlf3	0	0	1	1468	5058	NM_018776	-	FALSE	0	0	132.143	1
chr11.79893121.79893240	chr11	79893121	79893240	*	0	0	-27.2091	Crlf3	0	0	1	1469	1218	NM_018776	-	FALSE	0	1	145.286	1
chr11.79893361.79893480	chr11	79893361	79893480	*	0	0	-30.533	Crlf3	1	0	1	1470	978	NM_018776	-	TRUE	0	1	129.571	1
chr1.180148921.180149040	chr1	180148921	180149040	*	1.41331e-13	7.40362e-13	27.6237	Pppde1	0	0	1	1471	31375	NM_024282	+	FALSE	0	0	61.7143	1
chr11.80241481.80241600	chr11	80241481	80241600	*	3.65686e-10	1.28878e-09	26.0737	NA	1	0	0	1472	-517	NM_178616	+	TRUE	0	1	52.5714	1
chr1.180288361.180288480	chr1	180288361	180288480	*	3.48721e-13	1.7486e-12	30.7104	NA	0	0	0	1473	-20447	NM_016805	-	FALSE	0	0	47.8571	1
chr1.180288481.180288600	chr1	180288481	180288600	*	0	0	28.5843	NA	0	0	0	1474	-20567	NM_016805	-	FALSE	0	0	367.143	3
chr1.180288601.180288720	chr1	180288601	180288720	*	0	0	38.8201	NA	0	0	0	1475	-20687	NM_016805	-	FALSE	0	0	63.4286	1
chr11.80291401.80291520	chr11	80291401	80291520	*	0	0	30.8872	Cdk5r1	1	1	0	1476	855	NM_009871	+	TRUE	1	0	81.5714	7
chr11.80557201.80557320	chr11	80557201	80557320	*	0	0	-26.5852	Myo1d	0	0	1	1477	36208	NM_177390	-	FALSE	0	0	224.571	1
chr11.80557441.80557560	chr11	80557441	80557560	*	0	0	-27.8108	Myo1d	0	0	1	1478	35968	NM_177390	-	FALSE	0	0	161.857	1
chr11.81400801.81400920	chr11	81400801	81400920	*	6.66134e-16	4.39546e-15	29.2998	Accn1	0	0	1	1479	-13761	NM_001033765	-	FALSE	0	0	51.7143	7
chr1.181423201.181423320	chr1	181423201	181423320	*	0	0	-26.3038	Smyd3	0	0	1	1480	24815	NM_027188	-	FALSE	0	0	453	3
chr1.181437241.181437360	chr1	181437241	181437360	*	0	0	31.9894	Smyd3	0	0	1	1481	10775	NM_027188	-	FALSE	0	0	48.1429	1
chr1.181498801.181498920	chr1	181498801	181498920	*	0	0	27.5441	Cnst	0	0	1	1482	22143	NM_146105	+	FALSE	0	0	89.1429	1
chr11.82064881.82065000	chr11	82064881	82065000	*	6.10623e-14	3.32046e-13	31.6264	NA	0	0	0	1483	-71568	NM_011329	-	FALSE	0	0	43.1429	1
chr1.182105041.182105160	chr1	182105041	182105160	*	0	0	27.557	Cabc1	0	0	1	1484	18457	NM_001163290	-	FALSE	0	0	131.286	2
chr1.18213721.18213840	chr1	18213721	18213840	*	0	0	31.8053	NA	1	0	0	1485	-77	NR_002879	-	TRUE	0	0	107	1
chr1.18213841.18213960	chr1	18213841	18213960	*	0	0	29.6659	NA	1	0	0	1486	-197	NR_002879	-	TRUE	0	0	126.429	2
chr1.182140321.182140440	chr1	182140321	182140440	*	0	0	28.4989	NA	0	0	0	1487	-14171	NM_023341	-	FALSE	0	0	89.2857	2
chr1.182258881.182259000	chr1	182258881	182259000	*	0	0	29.2345	Gm5069	0	1	0	1488	-1607	NM_001081175	+	FALSE	0	1	90.8571	1
chr11.82258921.82259040	chr11	82258921	82259040	*	0	0	27.1946	Tmem132e	0	1	0	1489	56521	NM_023438	+	FALSE	0	0	86	2
chr1.182325721.182325840	chr1	182325721	182325840	*	0	0	26.4025	Itpkb	0	0	1	1490	-65042	NR_003623	-	FALSE	0	0	169.286	1
chr1.182352601.182352720	chr1	182352601	182352720	*	1.11022e-16	7.76597e-16	27.2078	Itpkb	0	1	0	1491	60916	NM_001081227	-	FALSE	0	0	80.2857	1
chr1.182361961.182362080	chr1	182361961	182362080	*	0	0	-31.8163	NA	0	0	0	1492	51556	NM_001081227	-	FALSE	0	0	215.286	4
chr11.82702201.82702320	chr11	82702201	82702320	*	0	0	29.8969	Rad51l3	0	0	1	1493	1798	NM_011235	-	FALSE	0	1	209.857	5
chr1.182760721.182760840	chr1	182760721	182760840	*	0	0	29.703	NA	0	0	0	1494	-16988	NM_008210	-	FALSE	0	0	111.143	2
chr11.82785121.82785240	chr11	82785121	82785240	*	4.76286e-14	2.61926e-13	25.0971	Gm11424	0	0	0	1495	-10939	NR_045932	-	FALSE	0	0	69.1429	5
chr1.182856481.182856600	chr1	182856481	182856600	*	0	0	-27.4329	NA	0	0	0	1496	-8570	NM_010094	+	FALSE	0	0	149.429	2
chr1.182873761.182873880	chr1	182873761	182873880	*	1.11022e-16	7.76597e-16	28.18	Tmem63a	0	0	1	1497	1114	NM_144794	+	TRUE	0	1	61.7143	2
chr11.83037721.83037840	chr11	83037721	83037840	*	0	0	-25.9522	AI662270	1	1	1	1498	645	NR_015519	+	TRUE	0	0	274.143	3
chr11.83240881.83241000	chr11	83240881	83241000	*	0	0	-26.9444	Gas2l2	0	1	1	1499	2024	NM_001013759	-	FALSE	0	0	238.714	12
chr1.183242521.183242640	chr1	183242521	183242640	*	0	0	-28.4843	NA	0	0	0	1500	-40119	NM_001160212	+	FALSE	0	0	82.7143	1
chr1.183242641.183242760	chr1	183242641	183242760	*	0	0	-33.6456	NA	0	0	0	1501	-39999	NM_001160212	+	FALSE	0	0	296	4
chr1.183247201.183247320	chr1	183247201	183247320	*	0	0	-27.032	NA	0	0	0	1502	-35439	NM_001160212	+	FALSE	0	0	243.429	6
chr11.83261761.83261880	chr11	83261761	83261880	*	0	0	39.6797	Mmp28	0	0	1	1503	10567	NM_025492	+	FALSE	0	0	197.714	3
chr11.83261881.83262000	chr11	83261881	83262000	*	0	0	41.4225	Mmp28	0	0	1	1504	10687	NM_025492	+	FALSE	0	0	91.2857	1
chr11.83273881.83274000	chr11	83273881	83274000	*	0	0	25.8386	Mmp28	0	0	1	1505	2464	NM_080453	-	FALSE	0	0	110.286	2
chr11.83285761.83285880	chr11	83285761	83285880	*	0	0	26.3278	NA	1	0	0	1506	-730	NM_027427	+	TRUE	0	1	344.429	3
chr1.183348121.183348240	chr1	183348121	183348240	*	9.44267e-12	4.02729e-11	26.381	Cnih3	0	0	1	1507	65364	NM_028408	+	FALSE	0	0	62	2
chr1.183348361.183348480	chr1	183348361	183348480	*	5.68212e-13	2.77935e-12	29.9598	Cnih3	0	0	1	1508	65604	NM_028408	+	FALSE	0	0	53	1
chr11.83382721.83382840	chr11	83382721	83382840	*	0	0	-27.6154	NA	0	0	0	1509	9299	NM_011338	-	FALSE	0	0	76.4286	3
chr11.83382841.83382960	chr11	83382841	83382960	*	0	0	-27.7297	NA	0	0	0	1510	9179	NM_011338	-	FALSE	0	0	155.571	4
chr11.8346001.8346120	chr11	8346001	8346120	*	0	0	29.847	Tns3	0	0	1	1511	218419	NM_001083587	-	FALSE	0	0	55.4286	2
chr1.183794881.183795000	chr1	183794881	183795000	*	5.54001e-13	2.71377e-12	26.0585	NA	0	0	0	1512	-22350	NM_133815	-	FALSE	0	0	61.4286	1
chr1.183958921.183959040	chr1	183958921	183959040	*	0	0	29.5316	NA	0	0	0	1513	-8811	NM_001083121	-	FALSE	0	0	119.286	8
chr1.184019401.184019520	chr1	184019401	184019520	*	0	0	26.8299	NA	0	0	0	1514	-35348	NM_012058	+	FALSE	0	0	365.571	4
chr11.84164761.84164880	chr11	84164761	84164880	*	0	0	-26.7749	Acaca	0	0	1	1515	155823	NM_133360	+	FALSE	0	0	97	1
chr1.184184761.184184880	chr1	184184761	184184880	*	0	0	-29.6459	NA	0	0	0	1516	28011	NM_007853	-	FALSE	0	0	156.571	3
chr1.184185001.184185120	chr1	184185001	184185120	*	0	0	-26.8056	NA	0	0	0	1517	27771	NM_007853	-	FALSE	0	0	225.286	5
chr1.184185121.184185240	chr1	184185121	184185240	*	7.21645e-15	4.30832e-14	-26.982	NA	0	0	0	1518	27651	NM_007853	-	FALSE	0	0	64.5714	1
chr1.184185601.184185720	chr1	184185601	184185720	*	0	0	-26.9486	NA	0	0	0	1519	27171	NM_007853	-	FALSE	0	0	423.857	5
chr1.184200961.184201080	chr1	184200961	184201080	*	0	0	32.9029	NA	0	0	0	1520	11811	NM_007853	-	FALSE	0	0	57.8571	1
chr11.84286921.84287040	chr11	84286921	84287040	*	0	0	34.6666	Aatf	0	0	1	1521	39964	NM_019816	-	FALSE	0	0	127.286	1
chr1.184391161.184391280	chr1	184391161	184391280	*	4.57501e-12	2.02561e-11	26.9463	Trp53bp2	0	0	1	1522	51865	NM_173378	+	FALSE	0	0	53.8571	1
chr1.184391281.184391400	chr1	184391281	184391400	*	4.29656e-13	2.13343e-12	29.8333	Trp53bp2	0	0	1	1523	51985	NM_173378	+	FALSE	0	0	48.7143	1
chr1.184485721.184485840	chr1	184485721	184485840	*	0	0	38.6513	NA	0	0	0	1524	-9298	NM_130890	+	FALSE	0	0	45.5714	3
chr1.184485841.184485960	chr1	184485841	184485960	*	0	0	40.0725	NA	0	0	0	1525	-9178	NM_130890	+	FALSE	0	0	39	2
chr11.8515921.8516040	chr11	8515921	8516040	*	0	0	37.2393	Tns3	0	0	1	1526	48499	NM_001083587	-	FALSE	0	0	46.4286	2
chr11.8529001.8529120	chr11	8529001	8529120	*	0	0	-28.0009	Tns3	0	0	1	1527	35419	NM_001083587	-	FALSE	0	0	247.286	4
chr11.85305601.85305720	chr11	85305601	85305720	*	3.33067e-16	2.25203e-15	33.9141	Bcas3	0	0	1	1528	138937	NM_001166642	+	FALSE	0	0	50.4286	1
chr1.185334721.185334840	chr1	185334721	185334840	*	0	0	-26.5132	NA	0	0	0	1529	449804	NM_016928	+	FALSE	0	0	141.714	3
chr11.85589041.85589160	chr11	85589041	85589160	*	3.33067e-16	2.25203e-15	33.4518	Bcas3	1	1	1	1530	23	NR_046194	-	FALSE	0	0	52.7143	1
chr11.85653961.85654080	chr11	85653961	85654080	*	1.6398e-13	8.53045e-13	-26.3041	Tbx2	0	1	1	1531	7846	NM_009324	+	FALSE	0	1	70	1
chr11.85654561.85654680	chr11	85654561	85654680	*	0	0	-31.1166	Tbx2	0	1	0	1532	8446	NM_009324	+	FALSE	1	1	162	6
chr11.85664641.85664760	chr11	85664641	85664760	*	5.1706e-11	2.02231e-10	32.5727	NA	0	0	0	1533	18526	NM_009324	+	FALSE	0	0	34.2857	3
chr11.85809121.85809240	chr11	85809121	85809240	*	0	0	27.0291	NA	0	0	0	1534	28613	NR_046030	-	FALSE	0	0	498.571	3
chr11.85864801.85864920	chr11	85864801	85864920	*	0	0	27.3831	NA	0	0	0	1535	-26950	NR_046030	-	FALSE	0	0	162.857	1
chr11.85864921.85865040	chr11	85864921	85865040	*	0	0	28.6178	NA	0	0	0	1536	-27070	NR_046030	-	FALSE	0	0	313.714	2
chr11.85865041.85865160	chr11	85865041	85865160	*	0	0	29.8167	NA	0	0	0	1537	-27190	NR_046030	-	FALSE	0	0	200.714	2
chr11.86195161.86195280	chr11	86195161	86195280	*	0	0	25.6068	NA	0	0	0	1538	-24135	NM_001080931	-	FALSE	0	0	146.429	1
chr11.86197681.86197800	chr11	86197681	86197800	*	0	0	-33.3162	NA	0	0	0	1539	-26655	NM_001080931	-	FALSE	0	0	100.714	3
chr11.86209201.86209320	chr11	86209201	86209320	*	0	0	28.6189	NA	0	0	0	1540	-38175	NM_001080931	-	FALSE	0	0	413.714	2
chr11.86393401.86393520	chr11	86393401	86393520	*	0	0	36.4723	Gm9975	0	0	0	1541	4141	NR_029738	-	FALSE	0	0	62.4286	1
chr11.86531281.86531400	chr11	86531281	86531400	*	0	0	-28.1867	Cltc	0	1	1	1542	33700	NM_001098810	+	FALSE	0	0	276.714	2
chr11.86531401.86531520	chr11	86531401	86531520	*	0	0	-28.7212	Cltc	0	1	0	1543	33820	NM_001098810	+	FALSE	0	0	372.286	3
chr1.186553201.186553320	chr1	186553201	186553320	*	0	0	37.0242	Hlx	0	0	1	1544	3053	NM_008250	-	FALSE	0	1	197.571	2
chr11.86559121.86559240	chr11	86559121	86559240	*	0	0	28.2652	Cltc	0	0	1	1545	11755	NM_001003908	-	FALSE	0	0	131.714	1
chr1.186651361.186651480	chr1	186651361	186651480	*	0	0	30.1459	Mosc2	0	0	1	1546	-4995	NR_035502	-	FALSE	0	0	437	4
chr11.86654281.86654400	chr11	86654281	86654400	*	0	0	26.873	NA	0	0	0	1547	-33120	NM_026191	-	FALSE	0	0	160.286	1
chr1.186707641.186707760	chr1	186707641	186707760	*	0	0	28.4556	NA	1	0	0	1548	-727	NM_178692	-	TRUE	0	1	191.143	3
chr1.186759481.186759600	chr1	186759481	186759600	*	0	0	28.6769	Mark1	0	0	1	1549	-52567	NM_178692	-	FALSE	0	0	98.4286	1
chr1.186759721.186759840	chr1	186759721	186759840	*	0	0	32.1867	Mark1	0	0	1	1550	-52807	NM_178692	-	FALSE	0	0	115.429	1
chr11.86987281.86987400	chr11	86987281	86987400	*	0	0	34.2691	Trim37	0	0	1	1551	46706	NM_197987	+	FALSE	0	0	73.2857	2
chr1.187032121.187032240	chr1	187032121	187032240	*	6.61693e-14	3.58627e-13	-26.6234	Rab3gap2	0	0	1	1552	4076	NM_001163754	+	FALSE	0	0	69	2
chr11.8711881.8712000	chr11	8711881	8712000	*	0	0	28.2711	NA	0	0	0	1553	-147344	NM_001083587	-	FALSE	0	0	107.571	1
chr11.8726161.8726280	chr11	8726161	8726280	*	0	0	30.3348	NA	0	0	0	1554	-161624	NM_001083587	-	FALSE	0	0	98.8571	1
chr1.187305841.187305960	chr1	187305841	187305960	*	1.33472e-10	4.96286e-10	28.1119	NA	0	0	0	1555	-15225	NR_033600	+	FALSE	0	0	40.5714	1
chr1.187306081.187306200	chr1	187306081	187306200	*	0	0	33.1322	NA	0	0	0	1556	-14985	NR_033600	+	FALSE	0	0	268.714	7
chr11.87368041.87368160	chr11	87368041	87368160	*	0	0	28.4648	Tex14	0	0	1	1557	-26473	NM_011129	+	FALSE	0	0	122	2
chr11.87391201.87391320	chr11	87391201	87391320	*	0	0	29.1603	NA	0	0	0	1558	-3313	NM_011129	+	TRUE	0	1	91.4286	2
chr11.87563281.87563400	chr11	87563281	87563400	*	2.60436e-11	1.05451e-10	-26.0922	NA	0	0	0	1559	-6966	NR_029555	+	FALSE	0	0	49.2857	2
chr11.87563881.87564000	chr11	87563881	87564000	*	3.31957e-13	1.66862e-12	-28.1582	NA	0	0	0	1560	-6366	NR_029555	+	FALSE	0	0	58.8571	1
chr11.87564721.87564840	chr11	87564721	87564840	*	0	0	-26.1071	NA	0	0	0	1561	-5526	NR_029555	+	FALSE	0	0	113.429	3
chr11.87564841.87564960	chr11	87564841	87564960	*	0	0	-26.7462	NA	0	0	0	1562	-5406	NR_029555	+	FALSE	0	0	112.286	4
chr11.87565681.87565800	chr11	87565681	87565800	*	2.05791e-11	8.43677e-11	-27.1603	NA	0	0	0	1563	-4566	NR_029555	+	FALSE	0	0	56	3
chr11.87567481.87567600	chr11	87567481	87567600	*	0	0	-31.2263	NA	0	0	0	1564	-2766	NR_029555	+	FALSE	0	0	73.5714	2
chr11.87567841.87567960	chr11	87567841	87567960	*	0	0	-25.8522	NA	0	0	0	1565	-2406	NR_029555	+	FALSE	0	0	112.571	2
chr11.87570361.87570480	chr11	87570361	87570480	*	0	0	-35.3166	Mir142	1	1	0	1566	0	NR_029555	+	TRUE	0	0	330.429	6
chr11.87570481.87570600	chr11	87570481	87570600	*	0	0	-37.2549	NA	1	0	0	1567	117	NR_029555	+	TRUE	0	0	242.286	3
chr11.87570601.87570720	chr11	87570601	87570720	*	0	0	-45.0674	NA	1	0	0	1568	237	NR_029555	+	TRUE	0	0	289.143	9
chr11.87570721.87570840	chr11	87570721	87570840	*	0	0	-28.9778	NA	1	0	0	1569	357	NR_029555	+	TRUE	0	0	271	5
chr11.87570841.87570960	chr11	87570841	87570960	*	0	0	-36.8631	NA	1	0	0	1570	477	NR_029555	+	TRUE	0	0	134	3
chr11.87611041.87611160	chr11	87611041	87611160	*	0	0	32.7072	Mpo	0	1	1	1571	3757	NM_010824	+	FALSE	0	0	231.571	6
chr11.87883441.87883560	chr11	87883441	87883560	*	0	0	27.337	Vezf1	0	0	1	1572	1662	NM_016686	+	FALSE	0	1	166.429	2
chr11.87932281.87932400	chr11	87932281	87932400	*	2.56411e-10	9.2086e-10	25.0145	Cuedc1	0	0	1	1573	19635	NM_198013	+	FALSE	0	0	32.4286	1
chr11.87959041.87959160	chr11	87959041	87959160	*	0	0	-30.5474	Cuedc1	0	0	1	1574	-23907	NM_001172099	+	FALSE	0	0	94.8571	1
chr11.88000921.88001040	chr11	88000921	88001040	*	2.22045e-16	1.52189e-15	25.2342	Cuedc1	0	0	1	1575	-16880	NM_024174	+	FALSE	0	0	67	4
chr11.88006921.88007040	chr11	88006921	88007040	*	0	0	-41.5196	Cuedc1	0	1	0	1576	-10880	NM_024174	+	FALSE	1	1	71	6
chr1.188058361.188058480	chr1	188058361	188058480	*	0	0	28.7719	NA	0	0	0	1577	-117173	NM_146106	-	FALSE	0	0	99.1429	2
chr11.88074001.88074120	chr11	88074001	88074120	*	4.36257e-10	1.52305e-09	27.6276	NA	0	0	0	1578	-33425	NM_028859	+	FALSE	0	0	43.2857	2
chr1.188085361.188085480	chr1	188085361	188085480	*	0	0	31.6209	NA	0	0	0	1579	-144173	NM_146106	-	FALSE	0	0	67.5714	1
chr1.188085601.188085720	chr1	188085601	188085720	*	0	0	38.9668	NA	0	0	0	1580	-144413	NM_146106	-	FALSE	0	0	68.7143	1
chr11.88170721.88170840	chr11	88170721	88170840	*	0	0	32.04	Msi2	0	0	1	1581	4448	NR_039545	+	FALSE	0	0	88.5714	1
chr11.88329721.88329840	chr11	88329721	88329840	*	0	0	-35.3101	Msi2	0	0	1	1582	163448	NR_039545	+	FALSE	0	0	100	2
chr1.188434081.188434200	chr1	188434081	188434200	*	0	0	29.6849	NA	0	0	0	1583	95672	NM_009367	-	FALSE	0	0	124.143	2
chr11.88460041.88460160	chr11	88460041	88460160	*	9.99201e-16	6.49239e-15	-27.5962	NA	0	0	1	1584	119384	NM_054043	-	FALSE	0	0	65.7143	3
chr11.88488601.88488720	chr11	88488601	88488720	*	0	0	-26.3927	NA	0	0	1	1585	90824	NM_054043	-	FALSE	0	0	97.2857	1
chr1.188526361.188526480	chr1	188526361	188526480	*	0	0	28.4253	Tgfb2	0	0	1	1586	3392	NM_009367	-	FALSE	0	1	170.143	2
chr11.88664641.88664760	chr11	88664641	88664760	*	0	0	28.6043	NA	0	0	0	1587	48058	NM_009648	-	FALSE	0	0	122	5
chr1.188754481.188754600	chr1	188754481	188754600	*	1.11022e-16	7.76597e-16	25.4842	NA	0	0	0	1588	-36695	NM_033077	+	FALSE	0	0	97.1429	1
chr11.88758961.88759080	chr11	88758961	88759080	*	5.973e-13	2.9144e-12	25.9221	NA	0	0	0	1589	-8162	NR_045955	+	FALSE	0	0	63.7143	2
chr11.88857601.88857720	chr11	88857601	88857720	*	0	0	25.9948	NA	0	0	0	1590	-2997	NM_009546	+	FALSE	0	0	161.143	2
chr11.88858081.88858200	chr11	88858081	88858200	*	5.55112e-16	3.68631e-15	31.2662	NA	0	0	0	1591	-2517	NM_009546	+	FALSE	0	0	48.5714	1
chr11.88922521.88922640	chr11	88922521	88922640	*	0	0	36.0086	A930013B10Rik	1	0	0	1592	-460	NM_019505	-	TRUE	0	1	44.7143	1
chr11.89201641.89201760	chr11	89201641	89201760	*	0	0	43.7739	NA	0	0	0	1593	-37769	NM_008711	-	FALSE	0	0	63.7143	5
chr1.189530041.189530160	chr1	189530041	189530160	*	3.46089e-10	1.22371e-09	29.3863	LOC100504550	0	0	1	1594	97158	NM_001243792	+	FALSE	0	0	41.5714	1
chr11.89817241.89817360	chr11	89817241	89817360	*	0	0	28.5076	NA	0	0	0	1595	46849	NM_008796	-	FALSE	0	0	266.714	3
chr11.89839801.89839920	chr11	89839801	89839920	*	2.91989e-14	1.64175e-13	25.1687	NA	0	0	0	1596	24289	NM_008796	-	FALSE	0	0	73.4286	1
chr11.89840041.89840160	chr11	89840041	89840160	*	0	0	27.6714	NA	0	0	0	1597	24049	NM_008796	-	FALSE	0	0	255.286	3
chr11.89840161.89840280	chr11	89840161	89840280	*	0	0	25.9748	NA	0	0	0	1598	23929	NM_008796	-	FALSE	0	0	331	2
chr11.89840281.89840400	chr11	89840281	89840400	*	0	0	33.3721	NA	0	0	0	1599	23809	NM_008796	-	FALSE	0	0	138	2
chr11.89846521.89846640	chr11	89846521	89846640	*	2.78363e-09	8.75449e-09	-27.6398	Pctp	0	0	1	1600	17569	NM_008796	-	FALSE	0	0	36.2857	1
chr1.189942001.189942120	chr1	189942001	189942120	*	3.88578e-15	2.38424e-14	28.8091	Esrrg	0	0	1	1601	-109133	NR_038007	-	FALSE	0	0	59.7143	1
chr1.189942121.189942240	chr1	189942121	189942240	*	0	0	37.7282	Esrrg	0	0	1	1602	-109253	NR_038007	-	FALSE	0	0	52.5714	1
chr11.90120721.90120840	chr11	90120721	90120840	*	0	0	32.9069	Mmd	0	0	1	1603	9933	NM_026178	+	FALSE	0	0	67.2857	1
chr11.90249241.90249360	chr11	90249241	90249360	*	0	0	-29.9955	Hlf	0	1	0	1604	2872	NM_172563	-	TRUE	0	1	93.1429	4
chr11.90252721.90252840	chr11	90252721	90252840	*	0	0	27.5261	NA	1	0	0	1605	-491	NM_172563	-	TRUE	0	1	409	3
chr11.90252841.90252960	chr11	90252841	90252960	*	0	0	26.3559	NA	1	0	0	1606	-611	NM_172563	-	TRUE	0	1	241.429	2
chr11.90281161.90281280	chr11	90281161	90281280	*	5.35683e-13	2.6299e-12	-29.5043	NA	0	0	0	1607	-28931	NM_172563	-	FALSE	0	1	50.8571	1
chr11.90281401.90281520	chr11	90281401	90281520	*	0	0	-28.0089	NA	0	0	0	1608	-29171	NM_172563	-	FALSE	0	1	87.5714	1
chr11.90281521.90281640	chr11	90281521	90281640	*	0	0	-26.147	NA	0	0	0	1609	-29291	NM_172563	-	FALSE	0	1	141.286	2
chr1.190654681.190654800	chr1	190654681	190654800	*	9.28924e-13	4.43701e-12	25.6	Ush2a	0	0	1	1610	176920	NM_172650	-	FALSE	0	0	64.4286	2
chr11.90663961.90664080	chr11	90663961	90664080	*	0	0	-27.5322	NA	0	0	0	1611	-1925	NR_045956	+	FALSE	0	0	217.429	4
chr1.190826161.190826280	chr1	190826161	190826280	*	0	0	25.9219	Kctd3	0	0	1	1612	5440	NM_172650	-	FALSE	0	0	167.571	2
chr1.190909321.190909440	chr1	190909321	190909440	*	0	0	-31.8479	NA	0	0	0	1613	-77603	NM_172650	-	FALSE	0	0	99.1429	1
chr1.191597641.191597760	chr1	191597641	191597760	*	2.66454e-15	1.66168e-14	29.8354	Ptpn14	0	0	1	1614	45496	NM_008976	+	FALSE	0	0	56.4286	1
chr1.191602321.191602440	chr1	191602321	191602440	*	0	0	27.1246	Ptpn14	0	0	1	1615	50176	NM_008976	+	FALSE	0	0	250	2
chr1.191930521.191930640	chr1	191930521	191930640	*	0	0	30.3877	NA	0	0	0	1616	63920	NM_008937	-	FALSE	0	0	104	1
chr1.192028201.192028320	chr1	192028201	192028320	*	0	0	26.7024	LOC100504619	0	0	0	1617	-33643	NM_008937	-	FALSE	0	0	237.857	3
chr1.192899401.192899520	chr1	192899401	192899520	*	0	0	35.2294	Nsl1	0	0	1	1618	12503	NM_198654	+	FALSE	0	0	117.143	1
chr1.192899641.192899760	chr1	192899641	192899760	*	7.99361e-15	4.7515e-14	25.6116	Nsl1	0	0	1	1619	12743	NM_198654	+	FALSE	0	0	74.2857	2
chr1.193074121.193074240	chr1	193074121	193074240	*	3.64473e-10	1.28481e-09	-29.4251	NA	0	0	0	1620	-66910	NM_007498	-	FALSE	0	0	42.1429	1
chr1.193080841.193080960	chr1	193080841	193080960	*	0	0	27.1783	NA	0	0	0	1621	61038	NM_025424	-	FALSE	0	0	136.143	3
chr1.193177081.193177200	chr1	193177081	193177200	*	0	0	31.4297	Ppp2r5a	0	0	1	1622	27239	NM_025864	+	FALSE	0	0	95	4
chr1.193319161.193319280	chr1	193319161	193319280	*	0	0	35.9213	NA	0	0	0	1623	80134	NM_029766	-	FALSE	0	0	88.2857	2
chr1.193319281.193319400	chr1	193319281	193319400	*	0	0	33.8615	NA	0	0	0	1624	80014	NM_029766	-	FALSE	0	0	230	3
chr1.193387081.193387200	chr1	193387081	193387200	*	0	0	27.6582	Dtl	0	0	1	1625	12214	NM_029766	-	FALSE	0	0	290.429	3
chr1.193770481.193770600	chr1	193770481	193770600	*	0	0	28.5281	NA	0	0	0	1626	-30654	NM_001177900	+	FALSE	0	0	132.571	2
chr11.93858961.93859080	chr11	93858961	93859080	*	0	0	28.0887	Spag9	0	0	1	1627	1558	NM_001199204	+	FALSE	0	1	232.857	2
chr11.93995521.93995640	chr11	93995521	93995640	*	0	0	36.5498	NA	0	0	0	1628	-77128	NM_009427	+	FALSE	0	0	139.857	3
chr11.93995641.93995760	chr11	93995641	93995760	*	0	0	26.328	NA	0	0	0	1629	-77008	NM_009427	+	FALSE	0	0	109.857	2
chr11.93998161.93998280	chr11	93998161	93998280	*	1.44329e-15	9.24501e-15	25.7538	NA	0	0	0	1630	-74488	NM_009427	+	FALSE	0	0	85	4
chr11.94019761.94019880	chr11	94019761	94019880	*	1.11022e-16	7.76597e-16	26.9401	NA	0	0	0	1631	-52888	NM_009427	+	FALSE	0	0	79	1
chr11.94020001.94020120	chr11	94020001	94020120	*	0	0	27.3572	NA	0	0	0	1632	-52648	NM_009427	+	FALSE	0	0	124.857	6
chr11.94020361.94020480	chr11	94020361	94020480	*	0	0	28.7975	NA	0	0	0	1633	-52288	NM_009427	+	FALSE	0	0	168.286	3
chr11.94023601.94023720	chr11	94023601	94023720	*	0	0	31.7454	NA	0	0	0	1634	-49048	NM_009427	+	FALSE	0	0	113.714	2
chr11.94023721.94023840	chr11	94023721	94023840	*	0	0	31.659	NA	0	0	0	1635	-48928	NM_009427	+	FALSE	0	0	184.714	3
chr11.94188121.94188240	chr11	94188121	94188240	*	0	0	27.006	NA	0	0	0	1636	-1075	NM_027799	+	FALSE	0	1	392.571	3
chr11.94190641.94190760	chr11	94190641	94190760	*	1.00302e-11	4.26327e-11	27.5765	Ankrd40	0	0	1	1637	1328	NM_146024	+	FALSE	0	1	40.7143	1
chr11.94460401.94460520	chr11	94460401	94460520	*	0	0	26.2783	Acsf2	0	0	1	1638	2581	NM_153807	-	FALSE	0	0	190.286	2
chr1.194649121.194649240	chr1	194649121	194649240	*	0	0	30.5353	NA	0	0	0	1639	-18659	NR_040468	+	FALSE	0	0	175.571	3
chr1.194916721.194916840	chr1	194916721	194916840	*	0	0	31.8852	NA	0	0	0	1640	39606	NM_145415	-	FALSE	0	0	176.857	5
chr1.195027361.195027480	chr1	195027361	195027480	*	0	0	-29.3582	Traf3ip3	1	0	1	1641	261	NM_153137	-	TRUE	0	0	153	3
chr1.195098761.195098880	chr1	195098761	195098880	*	0	0	38.2098	c("LOC100503531", "G0s2")	1	1	0	1642	503	NM_008059	-	TRUE	0	0	179.857	10
chr1.195098881.195099000	chr1	195098881	195099000	*	0	0	40.1823	c("LOC100503531", "G0s2")	1	1	1	1643	383	NM_008059	-	TRUE	0	0	88.7143	3
chr1.195154081.195154200	chr1	195154081	195154200	*	0	0	32.4826	Lamb3	0	1	1	1644	25895	NM_008484	+	FALSE	0	0	61.2857	3
chr11.95215561.95215680	chr11	95215561	95215680	*	0	0	-33.5299	Fam117a	0	0	1	1645	17231	NM_172543	+	FALSE	0	0	470	5
chr11.95215681.95215800	chr11	95215681	95215800	*	0	0	-27.5069	Fam117a	0	0	1	1646	17351	NM_172543	+	FALSE	0	0	267.429	2
chr11.95215801.95215920	chr11	95215801	95215920	*	0	0	-29.2184	Fam117a	0	0	1	1647	17471	NM_172543	+	FALSE	0	0	179.571	2
chr11.95218321.95218440	chr11	95218321	95218440	*	0	0	-30.572	Fam117a	0	0	1	1648	19991	NM_172543	+	FALSE	0	0	414.714	3
chr11.95437201.95437320	chr11	95437201	95437320	*	2.75335e-14	1.5525e-13	32.4206	Ngfr	0	0	1	1649	11693	NM_033217	-	FALSE	0	1	35.8571	4
chr11.95437321.95437440	chr11	95437321	95437440	*	0	0	27.2804	Ngfr	0	0	1	1650	11573	NM_033217	-	FALSE	0	1	137	5
chr11.95444881.95445000	chr11	95444881	95445000	*	8.88178e-16	5.7972e-15	28.4224	Ngfr	0	0	1	1651	4013	NM_033217	-	FALSE	0	1	69.2857	2
chr11.95632201.95632320	chr11	95632201	95632320	*	0	0	28.4413	NA	0	0	0	1652	21822	NM_201609	+	FALSE	0	0	76.8571	1
chr11.95632321.95632440	chr11	95632321	95632440	*	0	0	30.2779	NA	0	0	0	1653	21942	NM_201609	+	FALSE	0	0	113.143	2
chr11.95697841.95697960	chr11	95697841	95697960	*	2.22045e-16	1.52189e-15	29.842	Abi3	0	0	1	1654	-5649	NM_023121	+	FALSE	0	0	55.1429	1
chr11.95697961.95698080	chr11	95697961	95698080	*	0	0	27.7447	Abi3	0	0	1	1655	-5529	NM_023121	+	FALSE	0	0	162.857	3
chr11.95853001.95853120	chr11	95853001	95853120	*	0	0	32.9735	Igf2bp1	0	0	1	1656	14139	NM_009951	-	FALSE	0	1	69.8571	5
chr11.96182161.96182280	chr11	96182161	96182280	*	0	0	25.389	Hoxb4	0	1	0	1657	-2160	NM_001079869	+	FALSE	0	1	303.429	6
chr11.96203161.96203280	chr11	96203161	96203280	*	0	0	29.6758	Hoxb3	0	0	1	1658	-1803	NM_010458	+	FALSE	1	1	147.143	6
chr11.96203281.96203400	chr11	96203281	96203400	*	0	0	25.5608	Hoxb3	0	0	1	1659	-1683	NM_010458	+	FALSE	1	0	198.571	10
chr11.96203521.96203640	chr11	96203521	96203640	*	0	0	32.7161	Hoxb3	0	0	1	1660	-1443	NM_010458	+	FALSE	1	1	639.286	9
chr11.96203761.96203880	chr11	96203761	96203880	*	0	0	28.1109	Hoxb3	0	0	1	1661	-1203	NM_010458	+	FALSE	0	1	184.143	2
chr11.96210961.96211080	chr11	96210961	96211080	*	0	0	26.3028	NA	0	0	0	1662	-1866	NM_134032	+	FALSE	0	0	83.5714	1
chr11.96211321.96211440	chr11	96211321	96211440	*	0	0	26.5218	NA	0	0	0	1663	-1506	NM_134032	+	FALSE	0	0	172.143	6
chr11.96211441.96211560	chr11	96211441	96211560	*	0	0	29.3635	NA	0	0	0	1664	-1386	NM_134032	+	FALSE	0	0	131.571	3
chr11.96688561.96688680	chr11	96688561	96688680	*	0	0	30.7492	Nfe2l1	0	1	0	1665	2137	NM_001130450	-	TRUE	0	0	230.429	6
chr11.96688681.96688800	chr11	96688681	96688800	*	1.72709e-11	7.14544e-11	25.4465	Nfe2l1	0	1	0	1666	2017	NM_001130450	-	TRUE	0	1	62.1429	4
chr11.96689281.96689400	chr11	96689281	96689400	*	0	0	27.6799	Nfe2l1	0	1	0	1667	1417	NM_001130450	-	TRUE	0	1	255.143	2
chr11.96689761.96689880	chr11	96689761	96689880	*	0	0	25.8939	Nfe2l1	1	0	1	1668	937	NM_001130450	-	TRUE	0	1	222.286	1
chr11.96724801.96724920	chr11	96724801	96724920	*	0	0	28.1833	NA	0	0	0	1669	13096	NR_029562	+	FALSE	0	1	75.2857	4
chr11.96740401.96740520	chr11	96740401	96740520	*	0	0	-30.117	NA	0	0	0	1670	28696	NR_029562	+	FALSE	0	0	87.8571	2
chr11.96790201.96790320	chr11	96790201	96790320	*	0	0	25.5253	NA	1	0	0	1671	-318	NM_146026	+	TRUE	0	0	95.1429	3
chr11.96790321.96790440	chr11	96790321	96790440	*	0	0	28.7184	NA	1	0	0	1672	-198	NM_146026	+	TRUE	0	0	78.5714	4
chr11.96790681.96790800	chr11	96790681	96790800	*	5.80413e-12	2.53888e-11	25.5709	Prr15l	1	1	0	1673	45	NM_146026	+	TRUE	0	0	58.4286	4
chr1.196844281.196844400	chr1	196844281	196844400	*	0	0	32.7242	C030002C11Rik	1	0	1	1674	690	NR_015566	+	TRUE	0	0	162.571	1
chr11.96848881.96849000	chr11	96848881	96849000	*	0	0	37.0735	NA	0	0	0	1675	-9880	NM_001080964	-	FALSE	0	0	71.1429	6
chr11.96855721.96855840	chr11	96855721	96855840	*	1.11022e-15	7.18395e-15	31.5731	NA	0	0	0	1676	-16720	NM_001080964	-	FALSE	0	0	56.8571	1
chr11.96990361.96990480	chr11	96990361	96990480	*	0	0	-32.3059	NA	0	0	0	1677	-13717	NM_019507	-	FALSE	0	0	62.5714	1
chr11.97005001.97005120	chr11	97005001	97005120	*	4.44089e-16	2.9725e-15	-29.9656	Tbkbp1	0	0	1	1678	5907	NM_198100	-	FALSE	0	0	62.2857	2
chr11.97150801.97150920	chr11	97150801	97150920	*	0	0	29.3655	NA	0	0	0	1679	-8912	NM_008942	-	FALSE	0	0	154	3
chr11.97151401.97151520	chr11	97151401	97151520	*	0	0	27.6165	NA	0	0	0	1680	-9512	NM_008942	-	FALSE	0	0	246.857	2
chr11.97163521.97163640	chr11	97163521	97163640	*	0	0	27.6069	NA	0	0	0	1681	-13390	NM_025927	+	FALSE	0	0	289.714	2
chr11.97163641.97163760	chr11	97163641	97163760	*	0	0	30.8088	NA	0	0	0	1682	-13270	NM_025927	+	FALSE	0	0	63.5714	2
chr11.97299001.97299120	chr11	97299001	97299120	*	2.52576e-13	1.28618e-12	30.0487	NA	0	0	0	1683	-12354	NM_021493	+	FALSE	0	0	42.2857	1
chr11.97299361.97299480	chr11	97299361	97299480	*	0	0	36.6927	NA	0	0	0	1684	-11994	NM_021493	+	FALSE	0	1	73.7143	1
chr11.97299481.97299600	chr11	97299481	97299600	*	0	0	34.8199	NA	0	0	0	1685	-11874	NM_021493	+	FALSE	0	1	102.571	1
chr11.97311361.97311480	chr11	97311361	97311480	*	0	0	33.7831	Arhgap23	1	1	0	1686	0	NM_021493	+	TRUE	0	0	105.429	6
chr11.97489561.97489680	chr11	97489561	97489680	*	0	0	29.4674	E130012A19Rik	0	1	0	1687	1351	NM_175332	-	FALSE	1	1	146	8
chr11.97559641.97559760	chr11	97559641	97559760	*	0	0	25.4505	Pcgf2	1	0	1	1688	939	NM_001163307	-	TRUE	0	1	197.286	5
chr11.97604281.97604400	chr11	97604281	97604400	*	1.93623e-13	9.99219e-13	27.9938	Pip4k2b	0	0	1	1689	1619	NM_054051	-	FALSE	0	1	56.7143	1
chr11.97667281.97667400	chr11	97667281	97667400	*	0	0	30.74	Lasp1	0	0	1	1690	6297	NM_010688	+	FALSE	0	0	69.4286	1
chr11.97667401.97667520	chr11	97667401	97667520	*	0	0	25.7581	Lasp1	0	0	1	1691	6417	NM_010688	+	FALSE	0	0	212.286	3
chr11.97674721.97674840	chr11	97674721	97674840	*	0	0	39.1836	Lasp1	0	0	1	1692	13737	NM_010688	+	FALSE	0	0	42.8571	1
chr11.97675201.97675320	chr11	97675201	97675320	*	0	0	28.187	Lasp1	0	0	1	1693	14217	NM_010688	+	FALSE	0	0	162.714	6
chr11.97677121.97677240	chr11	97677121	97677240	*	0	0	30.3418	Lasp1	0	0	1	1694	16137	NM_010688	+	FALSE	0	0	103	2
chr11.97683961.97684080	chr11	97683961	97684080	*	6.76348e-13	3.28025e-12	26.6705	Lasp1	0	0	1	1695	-18014	NM_001080935	+	FALSE	0	0	57	1
chr11.97684081.97684200	chr11	97684081	97684200	*	0	0	32.7674	Lasp1	0	0	1	1696	-17894	NM_001080935	+	FALSE	0	0	74.2857	2
chr11.97816201.97816320	chr11	97816201	97816320	*	0	0	-31.3636	Plxdc1	0	0	1	1697	31441	NM_001163608	-	FALSE	0	0	77.1429	3
chr11.98145241.98145360	chr11	98145241	98145360	*	0	0	40.2694	NA	0	0	0	1698	21323	NR_039579	+	FALSE	0	0	83.5714	5
chr11.98254201.98254320	chr11	98254201	98254320	*	0	0	-30.2637	Pgap3	0	0	1	1699	6257	NM_008890	+	FALSE	0	0	56.5714	1
chr11.98255041.98255160	chr11	98255041	98255160	*	0	0	-25.5066	Pgap3	0	0	1	1700	6645	NM_001033537	-	FALSE	0	0	138.143	2
chr11.98255161.98255280	chr11	98255161	98255280	*	0	0	-28.1217	Pgap3	0	0	1	1701	6525	NM_001033537	-	FALSE	0	0	110.714	1
chr11.98308681.98308800	chr11	98308681	98308800	*	0	0	30.8716	Grb7	1	0	1	1702	535	NM_010346	+	TRUE	0	0	59.4286	5
chr11.98450641.98450760	chr11	98450641	98450760	*	0	0	34.4375	NA	0	0	0	1703	-2083	NM_025661	-	FALSE	0	1	60.7143	2
chr11.98582881.98583000	chr11	98582881	98583000	*	0	0	30.1064	Med24	0	0	1	1704	7750	NM_011869	-	FALSE	0	0	362.714	4
chr11.98604721.98604840	chr11	98604721	98604840	*	0	0	28.9902	Thra	0	0	1	1705	1536	NM_178060	+	FALSE	0	1	296	3
chr11.98604961.98605080	chr11	98604961	98605080	*	0	0	32.57	Thra	0	0	1	1706	1776	NM_178060	+	FALSE	0	1	247.714	2
chr11.98700361.98700480	chr11	98700361	98700480	*	0	0	26.5459	Rapgefl1	0	0	1	1707	2264	NM_001080925	+	FALSE	0	1	86.4286	2
chr11.98783281.98783400	chr11	98783281	98783400	*	0	0	28.5425	Cdc6	0	1	0	1708	13818	NM_011799	+	FALSE	0	0	82.8571	7
chr11.98905081.98905200	chr11	98905081	98905200	*	0	0	31.5171	Igfbp4	0	0	1	1709	2509	NM_010517	+	FALSE	0	1	294.286	3
chr11.98908201.98908320	chr11	98908201	98908320	*	0	0	31.6499	Igfbp4	0	0	1	1710	5629	NM_010517	+	FALSE	0	0	107	1
chr11.98908321.98908440	chr11	98908321	98908440	*	0	0	34.1468	Igfbp4	0	0	1	1711	5749	NM_010517	+	FALSE	0	0	150.429	2
chr11.99011881.99012000	chr11	99011881	99012000	*	0	0	-28.5609	Ccr7	0	0	1	1712	4392	NM_007719	-	FALSE	0	0	264.571	6
chr11.99029401.99029520	chr11	99029401	99029520	*	0	0	-26.2674	NA	0	0	0	1713	-13011	NM_007719	-	FALSE	0	0	235.714	5
chr11.99050881.99051000	chr11	99050881	99051000	*	1.2943e-12	6.08543e-12	29.4893	NA	0	0	0	1714	-34491	NM_007719	-	FALSE	0	0	53.4286	1
chr1.20918761.20918880	chr1	20918761	20918880	*	0	0	-26.1813	Paqr8	0	0	1	1715	-22827	NM_027974	+	FALSE	0	0	260.286	2
chr12.100038721.100038840	chr12	100038721	100038840	*	0	0	-35.0559	Eml5	0	0	1	1716	29491	NM_001160108	+	FALSE	0	0	106.286	2
chr12.100335721.100335840	chr12	100335721	100335840	*	0	0	31.6535	NA	0	0	0	1717	65179	NR_038130	-	FALSE	0	0	153	3
chr12.100468081.100468200	chr12	100468081	100468200	*	4.32987e-15	2.64378e-14	25.9624	Foxn3	0	0	1	1718	-67064	NR_038130	-	FALSE	0	0	76.1429	2
chr12.100584001.100584120	chr12	100584001	100584120	*	0	0	27.0754	Foxn3	0	0	1	1719	104165	NM_183186	-	FALSE	0	0	119.143	1
chr12.100584121.100584240	chr12	100584121	100584240	*	0	0	30.4306	Foxn3	0	0	1	1720	104045	NM_183186	-	FALSE	0	0	383.143	4
chr12.100587961.100588080	chr12	100587961	100588080	*	0	0	25.1444	c("Foxn3", "LOC100503812")	0	0	1	1721	100205	NM_183186	-	FALSE	0	0	152.286	2
chr12.100590001.100590120	chr12	100590001	100590120	*	0	0	31.604	c("Foxn3", "LOC100503812")	0	0	1	1722	98165	NM_183186	-	FALSE	0	0	634.429	6
chr12.100590121.100590240	chr12	100590121	100590240	*	0	0	32.6593	c("Foxn3", "LOC100503812")	0	0	1	1723	98045	NM_183186	-	FALSE	0	0	400.429	3
chr12.100601401.100601520	chr12	100601401	100601520	*	0	0	29.4151	Foxn3	0	0	1	1724	86765	NM_183186	-	FALSE	0	0	784.429	3
chr12.100602481.100602600	chr12	100602481	100602600	*	0	0	26.5453	Foxn3	0	0	1	1725	85685	NM_183186	-	FALSE	0	0	149	3
chr12.100624441.100624560	chr12	100624441	100624560	*	4.44089e-16	2.9725e-15	39.7605	Foxn3	0	0	1	1726	63725	NM_183186	-	FALSE	0	0	37.4286	1
chr12.100629361.100629480	chr12	100629361	100629480	*	0	0	25.999	Foxn3	0	0	1	1727	58805	NM_183186	-	FALSE	0	1	356.571	2
chr12.100995241.100995360	chr12	100995241	100995360	*	0	0	30.9635	2610021K21Rik	0	0	1	1728	126293	NM_030172	-	FALSE	0	0	324.857	3
chr12.101451481.101451600	chr12	101451481	101451600	*	0	0	30.9572	NA	0	0	0	1729	13732	NM_009790	+	FALSE	0	0	169.286	1
chr12.101660641.101660760	chr12	101660641	101660760	*	1.08802e-14	6.38145e-14	29.9941	Ttc7b	0	0	1	1730	98273	NM_001033213	-	FALSE	0	0	52.1429	1
chr12.101758081.101758200	chr12	101758081	101758200	*	0	0	29.4964	Ttc7b	1	0	1	1731	833	NM_001033213	-	TRUE	0	1	286.429	2
chr12.102186601.102186720	chr12	102186601	102186720	*	0	0	25.7494	c("Ccdc88c", "A630072L19Rik")	0	1	1	1732	-40194	NM_001177673	-	FALSE	0	0	67.7143	2
chr12.102197281.102197400	chr12	102197281	102197400	*	4.47309e-13	2.21684e-12	29.9677	Ccdc88c	0	0	1	1733	-50874	NM_001177673	-	FALSE	0	0	39.7143	1
chr12.102234961.102235080	chr12	102234961	102235080	*	0	0	28.7313	Ccdc88c	0	0	1	1734	24924	NR_035421	-	FALSE	0	0	94.8571	3
chr12.102253561.102253680	chr12	102253561	102253680	*	0	0	-26.5139	Ccdc88c	0	0	1	1735	6324	NR_035421	-	FALSE	0	0	353.571	5
chr12.103113361.103113480	chr12	103113361	103113480	*	0	0	31.689	Trip11	0	0	1	1736	37902	NM_028446	-	FALSE	0	0	80	1
chr12.103500121.103500240	chr12	103500121	103500240	*	0	0	27.2701	Slc24a4	0	0	1	1737	-21044	NM_177620	+	FALSE	0	0	162.429	2
chr12.103522561.103522680	chr12	103522561	103522680	*	0	0	25.0066	Rin3	1	0	1	1738	712	NM_001161365	+	TRUE	0	1	115.143	2
chr12.103565761.103565880	chr12	103565761	103565880	*	0	0	26.2722	Rin3	0	0	1	1739	43912	NM_001161365	+	FALSE	0	0	124.429	2
chr12.103606081.103606200	chr12	103606081	103606200	*	0	0	-32.2914	Rin3	0	0	1	1740	71708	NM_011175	-	FALSE	0	0	143.429	2
chr12.103835521.103835640	chr12	103835521	103835640	*	7.92144e-13	3.8157e-12	28.3784	Itpk1	0	0	1	1741	42344	NM_007693	+	FALSE	0	0	56.4286	1
chr12.103855201.103855320	chr12	103855201	103855320	*	3.65238e-11	1.45424e-10	27.4189	c("Itpk1", "LOC100504113")	0	0	1	1742	62024	NM_007693	+	FALSE	0	0	44.1429	1
chr12.104567161.104567280	chr12	104567161	104567280	*	0	0	27.9754	Asb2	0	0	1	1743	13994	NM_001195726	+	FALSE	0	0	75.2857	2
chr12.105938041.105938160	chr12	105938041	105938160	*	0	0	28.1597	Dicer1	0	0	1	1744	52003	NM_148948	-	TRUE	0	0	102.571	2
chr12.106090201.106090320	chr12	106090201	106090320	*	0	0	27.9736	Clmn	0	0	1	1745	12967	NM_053155	-	FALSE	0	0	79.1429	4
chr12.106216681.106216800	chr12	106216681	106216800	*	0	0	30.3977	4831426I19Rik	0	0	1	1746	20088	NM_001042699	-	FALSE	0	0	60.8571	3
chr12.106216921.106217040	chr12	106216921	106217040	*	0	0	26.8379	4831426I19Rik	0	0	1	1747	19848	NM_001042699	-	FALSE	0	0	288.286	3
chr12.106217041.106217160	chr12	106217041	106217160	*	0	0	31.0664	4831426I19Rik	0	0	1	1748	19728	NM_001042699	-	FALSE	0	0	250.429	4
chr12.106217161.106217280	chr12	106217161	106217280	*	3.9968e-14	2.2163e-13	31.9135	4831426I19Rik	0	0	1	1749	19608	NM_001042699	-	FALSE	0	0	48.5714	1
chr12.106314601.106314720	chr12	106314601	106314720	*	0	0	33.5382	NA	0	0	0	1750	43704	NM_028419	+	FALSE	0	0	53.2857	2
chr12.106314721.106314840	chr12	106314721	106314840	*	0	0	38.7823	NA	0	0	0	1751	43824	NM_028419	+	FALSE	0	0	37.2857	2
chr12.106337041.106337160	chr12	106337041	106337160	*	0	0	-39.3162	NA	0	0	0	1752	-48083	NM_013775	+	FALSE	0	0	45	1
chr12.106367881.106368000	chr12	106367881	106368000	*	4.43154e-11	1.74728e-10	25.8862	NA	0	0	0	1753	-17243	NM_013775	+	FALSE	0	0	46.4286	1
chr12.106784401.106784520	chr12	106784401	106784520	*	0	0	25.7511	NA	0	0	0	1754	-16862	NM_009747	+	FALSE	0	0	487.429	6
chr12.107145241.107145360	chr12	107145241	107145360	*	6.41642e-12	2.79123e-11	29.8119	NA	0	0	0	1755	-103113	NM_001029844	+	FALSE	0	0	44.5714	1
chr12.107175361.107175480	chr12	107175361	107175480	*	0	0	-27.1392	NA	0	0	0	1756	-72993	NM_001029844	+	FALSE	0	1	302.857	3
chr12.109237921.109238040	chr12	109237921	109238040	*	0	0	-26.9038	Bcl11b	0	0	1	1757	3585	NM_021399	-	FALSE	0	0	100.714	2
chr12.109785721.109785840	chr12	109785721	109785840	*	0	0	33.2307	LOC100504467	0	0	1	1758	-7090	NM_007965	+	FALSE	0	0	134.714	4
chr12.109791241.109791360	chr12	109791241	109791360	*	5.10569e-12	2.24828e-11	29.4797	LOC100504467	0	0	1	1759	-1570	NM_007965	+	FALSE	0	1	48.4286	1
chr12.109936561.109936680	chr12	109936561	109936680	*	5.00711e-14	2.74713e-13	27.0955	Degs2	0	0	1	1760	3837	NM_001171002	-	FALSE	0	0	59	1
chr12.110142601.110142720	chr12	110142601	110142720	*	0	0	32.2131	Wdr25	0	0	1	1761	10121	NM_177602	+	FALSE	0	0	113.143	7
chr12.111656041.111656160	chr12	111656041	111656160	*	0	0	28.8842	NA	0	0	0	1762	-29229	NM_001135001	+	FALSE	0	0	114.714	3
chr12.111743401.111743520	chr12	111743401	111743520	*	1.51957e-11	6.32501e-11	-25.3505	Ppp2r5c	0	0	1	1763	19454	NM_012023	+	FALSE	0	0	65.8571	1
chr12.111847321.111847440	chr12	111847321	111847440	*	0	0	31.7851	Dync1h1	0	0	1	1764	7718	NM_030238	+	FALSE	0	0	64.5714	3
chr12.111926161.111926280	chr12	111926161	111926280	*	1.11022e-16	7.76597e-16	31.7313	NA	0	0	0	1765	-5333	NM_025488	-	FALSE	0	0	55.8571	1
chr12.111926401.111926520	chr12	111926401	111926520	*	0	0	45.8663	NA	0	0	0	1766	-5573	NM_025488	-	FALSE	0	0	107.429	3
chr12.112016281.112016400	chr12	112016281	112016400	*	0	0	-32.5383	Wdr20a	0	0	1	1767	40124	NM_027149	+	FALSE	0	0	59.4286	1
chr12.112089601.112089720	chr12	112089601	112089720	*	0	0	-30.2362	Zfp839	0	0	1	1768	1114	NM_001199785	+	FALSE	0	1	166.714	3
chr12.112089721.112089840	chr12	112089721	112089840	*	0	0	-32.2338	Zfp839	0	0	1	1769	1234	NM_001199785	+	FALSE	0	1	288.429	5
chr12.112246921.112247040	chr12	112246921	112247040	*	1.88738e-15	1.19405e-14	31.8324	NA	0	0	1	1770	14315	NR_036598	+	FALSE	0	0	46	4
chr12.112591561.112591680	chr12	112591561	112591680	*	0	0	28.0754	Cdc42bpb	0	0	1	1771	24250	NM_183016	-	FALSE	0	0	185.429	7
chr12.112591801.112591920	chr12	112591801	112591920	*	0	0	38.4555	Cdc42bpb	0	0	1	1772	24010	NM_183016	-	FALSE	0	0	263	7
chr12.112591921.112592040	chr12	112591921	112592040	*	0	0	42.2007	Cdc42bpb	0	0	1	1773	23890	NM_183016	-	FALSE	0	0	70.1429	2
chr12.112613041.112613160	chr12	112613041	112613160	*	0	0	25.0025	Cdc42bpb	0	0	1	1774	2770	NM_183016	-	FALSE	0	0	301	4
chr12.112613281.112613400	chr12	112613281	112613400	*	0	0	27.925	Cdc42bpb	0	0	1	1775	2530	NM_183016	-	FALSE	0	1	144	2
chr12.112613401.112613520	chr12	112613401	112613520	*	0	0	29.9796	Cdc42bpb	0	0	1	1776	2410	NM_183016	-	FALSE	0	1	70.1429	1
chr12.112613761.112613880	chr12	112613761	112613880	*	0	0	29.0913	Cdc42bpb	0	0	1	1777	2050	NM_183016	-	FALSE	0	1	146.429	2
chr12.112661881.112662000	chr12	112661881	112662000	*	0	0	-31.6579	1200009I06Rik	0	1	0	1778	6242	NM_028807	+	FALSE	1	0	81.1429	10
chr12.112788721.112788840	chr12	112788721	112788840	*	0	0	34.4998	NA	0	0	0	1779	9566	NR_033168	+	FALSE	0	0	55.5714	1
chr12.112788841.112788960	chr12	112788841	112788960	*	0	0	34.1129	NA	0	0	0	1780	9686	NR_033168	+	FALSE	0	0	77.1429	1
chr12.112913401.112913520	chr12	112913401	112913520	*	0	0	-31.8245	NA	0	0	0	1781	-2796	NM_001099793	+	FALSE	0	0	76.8571	1
chr12.112947001.112947120	chr12	112947001	112947120	*	0	0	26.7289	NA	0	0	0	1782	4348	NM_027404	-	FALSE	0	0	376	4
chr12.112947121.112947240	chr12	112947121	112947240	*	0	0	30.2711	NA	0	0	0	1783	4228	NM_027404	-	FALSE	0	0	85	1
chr12.112998361.112998480	chr12	112998361	112998480	*	0	0	25.0654	Klc1	0	0	1	1784	1303	NM_001025360	+	FALSE	0	1	164.286	2
chr12.113263201.113263320	chr12	113263201	113263320	*	0	0	25.1601	Tdrd9	0	0	1	1785	-44240	NM_001127685	-	FALSE	0	0	252.429	3
chr12.113393521.113393640	chr12	113393521	113393640	*	0	0	28.6935	Kif26a	0	0	1	1786	9104	NM_001097621	+	FALSE	0	0	75.4286	5
chr12.113726641.113726760	chr12	113726641	113726760	*	0	0	31.4529	NA	1	0	0	1787	-899	NM_177039	+	TRUE	0	0	86.4286	4
chr12.113726761.113726880	chr12	113726761	113726880	*	0	0	30.9341	NA	1	0	0	1788	-779	NM_177039	+	TRUE	0	0	125	4
chr12.113815201.113815320	chr12	113815201	113815320	*	0	0	27.166	NA	0	0	0	1789	-11675	NM_198411	+	FALSE	0	0	117	2
chr12.113836921.113837040	chr12	113836921	113837040	*	0	0	33.6392	Inf2	0	0	1	1790	9928	NM_198411	+	FALSE	0	1	47.7143	2
chr12.113842321.113842440	chr12	113842321	113842440	*	0	0	30.9305	Inf2	0	1	0	1791	15328	NM_198411	+	TRUE	0	0	71.4286	1
chr12.113884681.113884800	chr12	113884681	113884800	*	0	0	33.9958	Siva1	0	0	1	1792	1644	NM_001161737	+	FALSE	0	1	76.7143	1
chr12.113903761.113903880	chr12	113903761	113903880	*	0	0	34.6065	Akt1	0	0	1	1793	8608	NM_009652	-	FALSE	0	0	118.429	7
chr12.113952361.113952480	chr12	113952361	113952480	*	0	0	28.3358	NA	0	0	0	1794	-7905	NM_001024602	+	FALSE	0	0	70.8571	1
chr12.114032521.114032640	chr12	114032521	114032640	*	0	0	29.8548	LOC100503606	0	0	0	1795	-14546	NM_145450	+	FALSE	0	0	124	3
chr12.114032761.114032880	chr12	114032761	114032880	*	0	0	35.2795	LOC100503606	0	0	0	1796	-14306	NM_145450	+	FALSE	0	0	50.1429	2
chr12.114099121.114099240	chr12	114099121	114099240	*	0	0	-26.1064	Gpr132	1	1	0	1797	0	NM_019925	-	TRUE	0	0	233.714	3
chr12.114099241.114099360	chr12	114099241	114099360	*	0	0	-28.3587	NA	1	0	0	1798	-115	NM_019925	-	TRUE	0	0	107.571	2
chr12.114106561.114106680	chr12	114106561	114106680	*	0	0	-32.3982	NA	0	0	0	1799	-7435	NM_019925	-	FALSE	0	0	62.1429	2
chr12.114114121.114114240	chr12	114114121	114114240	*	0	0	37.9274	NA	0	0	0	1800	-14995	NM_019925	-	FALSE	0	1	42.8571	1
chr12.114136321.114136440	chr12	114136321	114136440	*	0	0	27.4757	NA	0	0	0	1801	31267	NM_010588	-	FALSE	0	0	91.7143	2
chr12.114389281.114389400	chr12	114389281	114389400	*	0	0	26.384	NA	1	0	0	1802	-823	NM_007763	+	TRUE	0	1	131.143	2
chr12.114406321.114406440	chr12	114406321	114406440	*	0	0	-27.5182	NA	0	0	0	1803	11691	NM_134041	+	FALSE	0	0	176	2
chr12.117554281.117554400	chr12	117554281	117554400	*	0	0	-32.0695	Esyt2	0	0	1	1804	34588	NM_028731	+	FALSE	0	0	60.1429	1
chr12.118499881.118500000	chr12	118499881	118500000	*	0	0	28.0115	Ptprn2	0	0	1	1805	10593	NR_029563	+	FALSE	0	0	94.4286	1
chr12.118771801.118771920	chr12	118771801	118771920	*	0	0	29.0147	Rapgef5	0	0	1	1806	16851	NM_175930	+	TRUE	0	1	96.4286	2
chr12.118830481.118830600	chr12	118830481	118830600	*	0	0	34.244	Rapgef5	0	0	1	1807	75531	NM_175930	+	FALSE	0	0	94.1429	1
chr12.118830721.118830840	chr12	118830721	118830840	*	2.22045e-16	1.52189e-15	25.7828	Rapgef5	0	0	1	1808	75771	NM_175930	+	FALSE	0	0	92	1
chr12.118989721.118989840	chr12	118989721	118989840	*	0	0	34.0954	Rapgef5	0	0	1	1809	-92494	NM_146040	+	FALSE	0	0	137.857	1
chr12.118989841.118989960	chr12	118989841	118989960	*	0	0	31.8294	Rapgef5	0	0	1	1810	-92374	NM_146040	+	FALSE	0	0	166.286	1
chr12.118990081.118990200	chr12	118990081	118990200	*	0	0	33.2117	Rapgef5	0	0	1	1811	-92134	NM_146040	+	FALSE	0	0	150.714	2
chr12.118990441.118990560	chr12	118990441	118990560	*	0	0	29.6823	Rapgef5	0	0	1	1812	-91774	NM_146040	+	FALSE	0	0	493.143	4
chr12.119153041.119153160	chr12	119153041	119153160	*	5.32907e-15	3.22612e-14	27.6024	Dnahc11	0	1	1	1813	70709	NM_146040	+	FALSE	0	0	71.2857	1
chr12.119153281.119153400	chr12	119153281	119153400	*	0	0	26.1075	Dnahc11	0	0	1	1814	70949	NM_146040	+	FALSE	0	0	158.429	4
chr12.119424961.119425080	chr12	119424961	119425080	*	0	0	29.0014	Dnahc11	0	0	1	1815	12437	NM_010060	-	FALSE	0	0	113	1
chr12.119425561.119425680	chr12	119425561	119425680	*	0	0	25.2927	Dnahc11	0	1	1	1816	11837	NM_010060	-	FALSE	0	0	97.2857	2
chr12.12156961.12157080	chr12	12156961	12157080	*	1.04346e-09	3.47043e-09	29.4598	NA	0	0	0	1817	-111865	NM_001146119	+	FALSE	0	0	33.5714	1
chr12.12700921.12701040	chr12	12700921	12701040	*	0	0	35.4197	NA	0	0	0	1818	247603	NM_008709	-	FALSE	0	0	326.143	7
chr12.12715921.12716040	chr12	12715921	12716040	*	1.4877e-14	8.61062e-14	30.0246	NA	0	0	0	1819	232603	NM_008709	-	FALSE	0	0	54.5714	5
chr12.12790921.12791040	chr12	12790921	12791040	*	0	0	32.6205	NA	0	0	0	1820	157603	NM_008709	-	FALSE	0	0	67.8571	1
chr12.12809281.12809400	chr12	12809281	12809400	*	0	0	27.174	NA	0	0	0	1821	139243	NM_008709	-	FALSE	0	0	132.571	5
chr12.12817561.12817680	chr12	12817561	12817680	*	0	0	32.3358	NA	0	0	0	1822	130963	NM_008709	-	FALSE	0	0	88.8571	3
chr12.12821641.12821760	chr12	12821641	12821760	*	0	0	26.8727	NA	0	0	0	1823	126883	NM_008709	-	FALSE	0	0	150.857	1
chr12.12834361.12834480	chr12	12834361	12834480	*	0	0	25.7192	NA	0	0	0	1824	114163	NM_008709	-	FALSE	0	0	103.286	2
chr12.12847681.12847800	chr12	12847681	12847800	*	0	0	28.5475	NA	0	0	0	1825	100843	NM_008709	-	FALSE	0	0	79.7143	4
chr12.12911281.12911400	chr12	12911281	12911400	*	0	0	30.6051	NA	0	0	0	1826	37243	NM_008709	-	FALSE	0	0	113.571	6
chr12.12911401.12911520	chr12	12911401	12911520	*	0	0	31.6301	NA	0	0	0	1827	37123	NM_008709	-	FALSE	0	0	71.8571	4
chr12.12911521.12911640	chr12	12911521	12911640	*	0	0	32.381	NA	0	0	0	1828	37003	NM_008709	-	FALSE	0	0	150.571	9
chr12.12911641.12911760	chr12	12911641	12911760	*	0	0	36.7377	NA	0	0	0	1829	36883	NM_008709	-	FALSE	0	0	102.429	4
chr12.12911761.12911880	chr12	12911761	12911880	*	5.55112e-16	3.68631e-15	27.4005	NA	0	0	0	1830	36763	NM_008709	-	FALSE	0	0	77.7143	6
chr12.14062921.14063040	chr12	14062921	14063040	*	0	0	25.8863	NA	0	0	0	1831	95805	NM_029007	-	FALSE	0	0	110.714	1
chr12.15660481.15660600	chr12	15660481	15660600	*	5.17919e-13	2.54681e-12	27.5728	NA	0	0	0	1832	162992	NM_144551	-	FALSE	0	0	57.1429	1
chr12.15859801.15859920	chr12	15859801	15859920	*	1.29818e-12	6.10222e-12	25.1819	NA	0	0	0	1833	-36211	NM_144551	-	FALSE	0	0	65	2
chr12.16028641.16028760	chr12	16028641	16028760	*	0	0	25.2942	NA	0	0	0	1834	-205051	NM_144551	-	FALSE	0	0	122.286	1
chr12.16144801.16144920	chr12	16144801	16144920	*	0	0	-26.9994	NA	0	0	0	1835	-321211	NM_144551	-	FALSE	0	0	204.143	1
chr12.16232521.16232640	chr12	16232521	16232640	*	0	0	-27.6153	NA	0	0	0	1836	363937	NM_172950	-	FALSE	0	0	124	1
chr12.16637161.16637280	chr12	16637161	16637280	*	1.03795e-12	4.9311e-12	28.579	NA	0	0	0	1837	-22996	NM_008747	+	FALSE	0	0	47.4286	1
chr12.16740841.16740960	chr12	16740841	16740960	*	0	0	28.5591	Greb1	0	0	1	1838	23086	NM_001252071	-	FALSE	0	0	92.5714	4
chr12.16847881.16848000	chr12	16847881	16848000	*	0	0	28.4547	NA	0	0	0	1839	30112	NR_027677	+	FALSE	0	0	673.571	4
chr12.16860481.16860600	chr12	16860481	16860600	*	0	0	35.0688	NA	0	0	0	1840	-41184	NM_009072	+	FALSE	0	0	86.8571	3
chr12.17272801.17272920	chr12	17272801	17272920	*	0	0	35.8182	NA	1	0	0	1841	-481	NM_027959	+	TRUE	0	1	72.4286	2
chr12.17475361.17475480	chr12	17475361	17475480	*	0	0	31.0158	NA	0	0	0	1842	-76199	NM_013614	+	FALSE	0	0	202.571	3
chr12.17517001.17517120	chr12	17517001	17517120	*	1.11022e-16	7.76597e-16	25.8196	NA	0	0	0	1843	-34559	NM_013614	+	FALSE	0	0	92.2857	5
chr12.17668561.17668680	chr12	17668561	17668680	*	0	0	27.2927	NA	0	0	0	1844	-28940	NM_016677	+	FALSE	0	0	70	2
chr12.17722561.17722680	chr12	17722561	17722680	*	0	0	-36.6436	Hpcal1	0	0	1	1845	24943	NM_016677	+	FALSE	0	0	131.143	2
chr12.17731441.17731560	chr12	17731441	17731560	*	1.49227e-10	5.51604e-10	-26.3951	Hpcal1	0	0	1	1846	33823	NM_016677	+	FALSE	0	0	46.7143	1
chr12.21118921.21119040	chr12	21118921	21119040	*	0	0	30.9601	Asap2	0	0	1	1847	1306	NM_001004364	+	FALSE	0	1	230.286	6
chr12.22891441.22891560	chr12	22891441	22891560	*	1.13243e-14	6.62968e-14	27.3395	NA	0	0	0	1848	-99137	NR_015504	+	FALSE	0	0	65.4286	1
chr12.25221481.25221600	chr12	25221481	25221600	*	0	0	27.7876	Taf1b	0	0	1	1849	-35552	NM_001161406	+	FALSE	0	0	89.4286	1
chr12.25409281.25409400	chr12	25409281	25409400	*	0	0	30.142	NA	0	0	0	1850	16164	NM_009104	+	FALSE	0	0	87	1
chr12.25578961.25579080	chr12	25578961	25579080	*	0	0	27.7043	Mboat2	0	0	1	1851	62499	NM_026037	+	FALSE	0	0	310.571	3
chr12.25648201.25648320	chr12	25648201	25648320	*	0	0	-29.0656	NA	0	0	0	1852	-11477	NM_001081378	+	FALSE	0	0	80	1
chr12.25648441.25648560	chr12	25648441	25648560	*	0	0	-25.4918	NA	0	0	0	1853	-11237	NM_001081378	+	FALSE	0	0	97.1429	1
chr12.25744801.25744920	chr12	25744801	25744920	*	0	0	25.1839	NA	0	0	0	1854	36038	NM_010496	-	FALSE	0	0	138.714	1
chr12.25782001.25782120	chr12	25782001	25782120	*	5.836e-12	2.55208e-11	-26.2008	NA	0	0	0	1855	-1045	NM_010496	-	FALSE	0	1	56.2857	1
chr12.25782721.25782840	chr12	25782721	25782840	*	0	0	-25.2151	NA	0	0	0	1856	-1765	NM_010496	-	FALSE	0	1	168.429	5
chr12.27097081.27097200	chr12	27097081	27097200	*	0	0	28.2787	Rnf144a	0	0	1	1857	2922	NM_080563	-	FALSE	0	0	88.4286	3
chr12.27218161.27218280	chr12	27218161	27218280	*	0	0	37.0725	NA	0	0	0	1858	64083	NM_020557	+	FALSE	0	0	122.286	4
chr12.29583721.29583840	chr12	29583721	29583840	*	0	0	25.7124	NA	0	0	0	1859	147030	NM_201357	+	FALSE	0	0	169.571	2
chr12.30592201.30592320	chr12	30592201	30592320	*	0	0	28.6951	Myt1l	0	0	1	1860	-30581	NM_181395	+	FALSE	0	0	78.8571	1
chr12.30592321.30592440	chr12	30592321	30592440	*	0	0	32.5048	Myt1l	0	0	1	1861	-30461	NM_181395	+	FALSE	0	0	87.4286	2
chr12.32635921.32636040	chr12	32635921	32636040	*	0	0	29.6974	NA	1	0	0	1862	-522	NM_153198	-	TRUE	0	1	146.714	1
chr12.32808601.32808720	chr12	32808601	32808720	*	5.61773e-14	3.06681e-13	25.5341	NA	0	0	0	1863	-62458	NM_011158	-	FALSE	0	0	77.8571	1
chr12.32819281.32819400	chr12	32819281	32819400	*	1.44329e-15	9.24501e-15	-28.4955	NA	0	0	0	1864	-73138	NM_011158	-	FALSE	0	0	63.5714	2
chr12.32891761.32891880	chr12	32891761	32891880	*	0	0	-30.3066	Pik3cg	0	0	1	1865	1324	NM_001146201	-	FALSE	0	0	330.571	2
chr12.32930641.32930760	chr12	32930641	32930760	*	5.55112e-16	3.68631e-15	33.5756	NA	0	0	0	1866	-37128	NM_001146200	-	FALSE	0	0	52.7143	1
chr12.33595441.33595560	chr12	33595441	33595560	*	0	0	31.4781	NA	0	0	0	1867	43095	NR_044986	-	FALSE	0	0	104.571	1
chr12.33611161.33611280	chr12	33611161	33611280	*	6.43929e-15	3.86254e-14	25.9155	NA	0	0	1	1868	27375	NR_044986	-	FALSE	0	0	61.5714	1
chr12.33867481.33867600	chr12	33867481	33867600	*	0	0	-28.9075	Atxn7l1	0	0	1	1869	34932	NM_028139	+	FALSE	0	0	82.8571	3
chr12.33867601.33867720	chr12	33867601	33867720	*	0	0	-25.591	Atxn7l1	0	0	1	1870	35052	NM_028139	+	FALSE	0	0	350.429	4
chr12.33867721.33867840	chr12	33867721	33867840	*	0	0	-33.0892	Atxn7l1	0	0	1	1871	35172	NM_028139	+	FALSE	0	0	140.286	1
chr12.33867841.33867960	chr12	33867841	33867960	*	0	0	-31.0903	Atxn7l1	0	0	1	1872	35292	NM_028139	+	FALSE	0	0	471.857	2
chr12.33868201.33868320	chr12	33868201	33868320	*	0	0	-27.9106	Atxn7l1	0	0	1	1873	35652	NM_028139	+	FALSE	0	0	125.429	2
chr12.33878401.33878520	chr12	33878401	33878520	*	0	0	29.3755	Atxn7l1	0	0	1	1874	45852	NM_028139	+	FALSE	0	0	272.857	3
chr12.33886441.33886560	chr12	33886441	33886560	*	1.23057e-12	5.80054e-12	26.1299	c("Atxn7l1", "LOC100504517")	0	0	1	1875	53892	NM_028139	+	FALSE	0	0	61	1
chr12.3390721.3390840	chr12	3390721	3390840	*	0	0	33.5845	Kif3c	0	0	1	1876	25591	NM_008445	+	FALSE	0	0	94.2857	2
chr12.33990001.33990120	chr12	33990001	33990120	*	0	0	-25.9521	Atxn7l1	0	0	1	1877	2623	NM_001033436	+	FALSE	0	0	209.286	3
chr12.33999721.33999840	chr12	33999721	33999840	*	0	0	-27.5908	Atxn7l1	0	0	1	1878	12343	NM_001033436	+	TRUE	0	0	486.857	5
chr12.33999841.33999960	chr12	33999841	33999960	*	0	0	-27.465	Atxn7l1	0	0	1	1879	12463	NM_001033436	+	TRUE	0	0	286.714	3
chr12.34080121.34080240	chr12	34080121	34080240	*	0	0	35.2157	Efcab10	1	0	1	1880	404	NM_029152	+	TRUE	0	0	97.4286	7
chr12.35343121.35343240	chr12	35343121	35343240	*	0	0	29.7262	NA	0	0	1	1881	-129368	NM_024124	-	FALSE	0	0	269.857	2
chr12.35343241.35343360	chr12	35343241	35343360	*	0	0	28.649	NA	0	0	1	1882	-129488	NM_024124	-	FALSE	0	0	79	1
chr12.35997721.35997840	chr12	35997721	35997840	*	0	0	44.941	NA	0	0	0	1883	-118153	NR_030449	-	FALSE	0	0	99.2857	4
chr12.35997841.35997960	chr12	35997841	35997960	*	0	0	31.2552	NA	0	0	0	1884	-118273	NR_030449	-	FALSE	0	0	217.857	3
chr12.36917041.36917160	chr12	36917041	36917160	*	6.99441e-15	4.18126e-14	-26.0804	Ankmy2	0	0	1	1885	27630	NM_027699	-	FALSE	0	0	81.1429	1
chr12.36941281.36941400	chr12	36941281	36941400	*	0	0	-26.5898	1700108M19Rik	0	0	1	1886	3390	NM_027699	-	FALSE	0	0	142.286	1
chr12.3739081.3739200	chr12	3739081	3739200	*	5.55112e-16	3.68631e-15	28.6422	Dtnb	0	0	1	1887	-67780	NM_007872	+	FALSE	0	0	74.4286	1
chr12.37967761.37967880	chr12	37967761	37967880	*	1.11022e-16	7.76597e-16	33.6184	NA	1	0	0	1888	-346	NM_178767	+	TRUE	0	0	49.4286	1
chr12.37968001.37968120	chr12	37968001	37968120	*	0	0	28.3604	NA	1	0	0	1889	-106	NM_178767	+	TRUE	0	0	120.857	1
chr12.37968601.37968720	chr12	37968601	37968720	*	0	0	40.8045	Tmem195	1	1	0	1890	377	NM_178767	+	TRUE	0	0	64.2857	2
chr12.3866761.3866880	chr12	3866761	3866880	*	0	0	30.766	Dnmt3a	0	0	1	1891	-4518	NR_045884	-	FALSE	0	0	67.8571	2
chr1.23941921.23942040	chr1	23941921	23942040	*	0	0	27.7445	NA	0	0	0	1892	-12794	NM_028534	-	FALSE	0	0	101.429	1
chr12.39515161.39515280	chr12	39515161	39515280	*	0	0	32.7775	Etv1	0	0	1	1893	4865	NM_001163154	+	FALSE	0	0	417.143	5
chr12.39515281.39515400	chr12	39515281	39515400	*	0	0	37.707	Etv1	0	0	1	1894	4985	NM_001163154	+	FALSE	0	0	72.1429	1
chr12.3960841.3960960	chr12	3960841	3960960	*	9.45355e-13	4.51155e-12	28.4362	NA	0	0	0	1895	5892	NM_008895	+	FALSE	0	1	47.8571	1
chr12.40724881.40725000	chr12	40724881	40725000	*	0	0	33.6889	NA	0	0	0	1896	38964	NM_007487	-	FALSE	0	0	74.2857	2
chr12.40725601.40725720	chr12	40725601	40725720	*	0	0	30.1503	NA	0	0	0	1897	38244	NM_007487	-	FALSE	0	0	71	2
chr12.40829521.40829640	chr12	40829521	40829640	*	0	0	-31.3456	Scin	0	0	1	1898	31176	NM_009132	-	FALSE	0	0	62.7143	1
chr12.40835041.40835160	chr12	40835041	40835160	*	0	0	-28.48	Scin	0	0	1	1899	25656	NM_009132	-	FALSE	0	0	85.4286	1
chr12.40975201.40975320	chr12	40975201	40975320	*	0	0	-33.4784	NA	0	0	0	1900	25252	NR_045157	+	FALSE	0	0	53.7143	1
chr12.40975321.40975440	chr12	40975321	40975440	*	0	0	-25.3911	NA	0	0	0	1901	25372	NR_045157	+	FALSE	0	0	152.286	1
chr1.24115081.24115200	chr1	24115081	24115200	*	0	0	30.2416	NA	0	0	0	1902	-7902	NM_026604	-	FALSE	0	0	144.286	2
chr12.41225641.41225760	chr12	41225641	41225760	*	0	0	38.5542	Dock4	0	0	1	1903	53003	NM_172803	+	FALSE	0	0	97.5714	4
chr12.41226121.41226240	chr12	41226121	41226240	*	0	0	29.4414	Dock4	0	0	1	1904	53483	NM_172803	+	FALSE	0	0	169	2
chr12.42875161.42875280	chr12	42875161	42875280	*	0	0	29.8354	Immp2l	0	0	1	1905	-662518	NM_010733	-	FALSE	0	0	118.286	1
chr12.4386361.4386480	chr12	4386361	4386480	*	3.53051e-13	1.76943e-12	27.4345	Ncoa1	0	0	1	1906	97581	NM_010881	-	FALSE	0	0	65	2
chr12.45020521.45020640	chr12	45020521	45020640	*	0	0	30.8388	NA	0	0	0	1907	290416	NM_013760	-	FALSE	0	0	100	1
chr12.4543441.4543560	chr12	4543441	4543560	*	0	0	-33.7204	NA	0	0	0	1908	-56254	NM_011365	+	FALSE	0	0	48.7143	1
chr12.45950041.45950160	chr12	45950041	45950160	*	0	0	27.8855	NA	0	0	0	1909	225311	NM_144552	-	FALSE	0	0	92.1429	1
chr12.52801201.52801320	chr12	52801201	52801320	*	0	0	32.3565	Ap4s1	0	0	1	1910	-8301	NM_052973	-	FALSE	0	0	87.8571	2
chr12.52957921.52958040	chr12	52957921	52958040	*	0	0	-26.0905	NA	0	0	0	1911	-27399	NM_144788	-	FALSE	0	0	286.143	4
chr12.52966561.52966680	chr12	52966561	52966680	*	4.92828e-13	2.42954e-12	30.2291	NA	0	0	0	1912	-36039	NM_144788	-	FALSE	0	0	31.7143	2
chr12.52972561.52972680	chr12	52972561	52972680	*	0	0	-32.2397	NA	0	0	0	1913	-42039	NM_144788	-	FALSE	0	0	146.286	3
chr12.53497201.53497320	chr12	53497201	53497320	*	0	0	45.4674	NA	0	0	0	1914	-119744	NM_009706	+	FALSE	0	0	60.1429	2
chr12.53497321.53497440	chr12	53497321	53497440	*	0	0	39.1287	NA	0	0	0	1915	-119624	NM_009706	+	FALSE	0	0	84.7143	3
chr12.53497801.53497920	chr12	53497801	53497920	*	5.55112e-15	3.35282e-14	25.3971	NA	0	0	0	1916	-119144	NM_009706	+	FALSE	0	0	88.1429	3
chr12.53603281.53603400	chr12	53603281	53603400	*	0	0	-28.4331	NA	0	0	0	1917	-13664	NM_009706	+	FALSE	0	1	152.857	1
chr12.53606641.53606760	chr12	53606641	53606760	*	0	0	31.9724	NA	0	0	0	1918	-10304	NM_009706	+	FALSE	0	1	113.857	2
chr12.53772481.53772600	chr12	53772481	53772600	*	0	0	32.5343	NA	0	0	0	1919	-27770	NM_198111	+	FALSE	0	0	191.571	2
chr12.53772601.53772720	chr12	53772601	53772720	*	0	0	32.553	NA	0	0	0	1920	-27650	NM_198111	+	FALSE	0	0	71.5714	3
chr12.53996641.53996760	chr12	53996641	53996760	*	0	0	33.9164	Akap6	0	0	1	1921	196273	NM_198111	+	FALSE	0	0	110.286	2
chr12.54162841.54162960	chr12	54162841	54162960	*	0	0	25.545	Akap6	0	0	1	1922	-186704	NM_013780	+	FALSE	0	0	181	3
chr12.54247681.54247800	chr12	54247681	54247800	*	0	0	27.1523	Akap6	0	0	1	1923	-101864	NM_013780	+	FALSE	0	0	255.143	4
chr12.54808801.54808920	chr12	54808801	54808920	*	4.64295e-13	2.29638e-12	31.1602	Npas3	0	0	1	1924	459139	NM_013780	+	FALSE	0	1	34.7143	2
chr12.55961401.55961520	chr12	55961401	55961520	*	1.11022e-16	7.76597e-16	29.1066	Cfl2	0	1	0	1925	2345	NM_007688	-	FALSE	0	1	69.2857	1
chr12.56160241.56160360	chr12	56160241	56160360	*	3.17191e-13	1.59795e-12	28.2563	2700097O09Rik	0	0	1	1926	20738	NR_030764	-	FALSE	0	0	54	1
chr12.56768161.56768280	chr12	56768161	56768280	*	0	0	31.1952	Ralgapa1	0	0	1	1927	68259	NM_020287	+	FALSE	0	0	85.1429	1
chr12.57397681.57397800	chr12	57397681	57397800	*	2.44249e-15	1.52907e-14	28.0359	NA	0	0	0	1928	43453	NR_045048	+	FALSE	0	0	72.5714	2
chr12.60109921.60110040	chr12	60109921	60110040	*	0	0	28.9596	Sec23a	0	0	1	1929	2965	NM_009147	-	FALSE	0	0	90	1
chr12.60141121.60141240	chr12	60141121	60141240	*	0	0	27.7519	NA	0	0	0	1930	21209	NM_030057	-	FALSE	0	0	98.5714	6
chr12.66529201.66529320	chr12	66529201	66529320	*	0	0	30.1586	NA	0	0	0	1931	202699	NM_027614	+	FALSE	0	0	518.286	4
chr12.70529401.70529520	chr12	70529401	70529520	*	0	0	31.7661	NA	0	0	0	1932	47018	NR_038061	-	FALSE	0	0	92.5714	1
chr12.70538281.70538400	chr12	70538281	70538400	*	0	0	31.7976	NA	0	0	0	1933	38138	NR_038061	-	FALSE	0	0	156.286	3
chr12.70980481.70980600	chr12	70980481	70980600	*	0	0	30.4696	Map4k5	0	0	1	1934	-13492	NM_178628	+	FALSE	0	0	85.5714	2
chr12.71086681.71086800	chr12	71086681	71086800	*	0	0	31.3362	Sav1	0	0	1	1935	1190	NM_022028	-	FALSE	0	1	116	2
chr12.71808721.71808840	chr12	71808721	71808840	*	0	0	26.5543	NA	0	0	0	1936	-117661	NM_028127	+	FALSE	0	0	72.8571	2
chr12.71813401.71813520	chr12	71813401	71813520	*	1.11022e-16	7.76597e-16	27.7333	NA	0	0	0	1937	-112981	NM_028127	+	FALSE	0	0	78.7143	1
chr12.71900761.71900880	chr12	71900761	71900880	*	0	0	27.911	NA	0	0	0	1938	-25621	NM_028127	+	FALSE	0	0	85.1429	3
chr12.72398041.72398160	chr12	72398041	72398160	*	9.66247e-11	3.65418e-10	28.5744	Gm7959	0	0	0	1939	-12711	NM_021532	+	FALSE	0	0	43.1429	1
chr12.72398161.72398280	chr12	72398161	72398280	*	0	0	28.1496	Gm7959	0	0	0	1940	-12591	NM_021532	+	FALSE	0	0	144.857	2
chr12.72551161.72551280	chr12	72551161	72551280	*	1.20544e-11	5.07319e-11	25.7966	NA	0	0	0	1941	-90314	NR_045941	+	FALSE	0	0	47.8571	1
chr12.72551281.72551400	chr12	72551281	72551400	*	0	0	32.9796	NA	0	0	0	1942	-90194	NR_045941	+	FALSE	0	0	105.286	2
chr12.72937921.72938040	chr12	72937921	72938040	*	1.42283e-11	5.94277e-11	29.0614	Daam1	0	0	1	1943	5858	NM_026102	+	FALSE	0	0	41.5714	1
chr12.72938041.72938160	chr12	72938041	72938160	*	2.1201e-11	8.67972e-11	32.7213	Daam1	0	0	1	1944	5978	NM_026102	+	FALSE	0	0	36.8571	1
chr12.73386481.73386600	chr12	73386481	73386600	*	0	0	27.6427	Rtn1	0	0	1	1945	-48771	NM_001007596	-	FALSE	0	0	176.143	6
chr12.73775521.73775640	chr12	73775521	73775640	*	4.44089e-16	2.9725e-15	-25.8427	NA	0	0	0	1946	-9707	NM_025522	-	FALSE	0	0	77.1429	2
chr12.74388841.74388960	chr12	74388841	74388960	*	0	0	29.3183	Slc38a6	0	0	1	1947	1008	NM_001037717	+	TRUE	0	1	96.2857	2
chr12.74577601.74577720	chr12	74577601	74577720	*	0	0	31.5289	NA	0	0	0	1948	-67052	NR_046013	-	FALSE	0	0	69.8571	4
chr12.74582401.74582520	chr12	74582401	74582520	*	0	0	26.9569	NA	0	0	0	1949	64863	NM_178715	-	FALSE	0	0	125.286	4
chr12.74684881.74685000	chr12	74684881	74685000	*	0	0	28.4425	NA	0	0	0	1950	-1028	NM_008856	+	FALSE	0	1	108.714	3
chr12.74982481.74982600	chr12	74982481	74982600	*	0	0	-29.1462	NA	0	0	0	1951	-26254	NM_010431	+	FALSE	0	0	127.143	2
chr12.74982721.74982840	chr12	74982721	74982840	*	0	0	-30.8116	NA	0	0	0	1952	-26014	NM_010431	+	FALSE	0	0	83.8571	2
chr12.76802641.76802760	chr12	76802641	76802760	*	1.45439e-14	8.42494e-14	32.1529	NA	0	0	0	1953	-32118	NM_028203	-	FALSE	0	0	44.2857	1
chr12.76827721.76827840	chr12	76827721	76827840	*	0	0	-31.3153	Sgpp1	0	0	1	1954	8877	NM_030750	-	FALSE	0	0	63.5714	2
chr12.77172961.77173080	chr12	77172961	77173080	*	1.33227e-15	8.56348e-15	28.5677	Syne2	0	0	1	1955	105167	NM_207707	-	FALSE	0	0	76	3
chr12.77289121.77289240	chr12	77289121	77289240	*	0	0	27.4959	NA	0	0	0	1956	-10876	NM_010157	-	FALSE	0	0	189.857	4
chr12.77463361.77463480	chr12	77463361	77463480	*	0	0	-31.0768	Zbtb25	0	0	1	1957	6972	NM_001172104	-	FALSE	0	0	246.286	5
chr12.77516641.77516760	chr12	77516641	77516760	*	0	0	-34.4102	NA	0	0	0	1958	-1826	NM_001163103	+	FALSE	0	1	66.1429	3
chr12.77516761.77516880	chr12	77516761	77516880	*	0	0	-35.1037	NA	0	0	0	1959	-1706	NM_001163103	+	FALSE	0	1	207.571	4
chr12.77635801.77635920	chr12	77635801	77635920	*	1.40998e-14	8.17993e-14	25.6792	Plekhg3	0	0	1	1960	1256	NM_153804	+	FALSE	0	1	69.7143	1
chr12.77642521.77642640	chr12	77642521	77642640	*	0	0	30.2673	Plekhg3	0	0	1	1961	6273	NR_046044	-	FALSE	0	0	135.286	3
chr12.77652481.77652600	chr12	77652481	77652600	*	7.83325e-09	2.31713e-08	26.8536	Plekhg3	0	0	1	1962	-3570	NR_046044	-	FALSE	0	0	38.5714	1
chr12.77920921.77921040	chr12	77920921	77921040	*	0	0	26.7499	Rab15	0	0	1	1963	2472	NM_134050	-	FALSE	0	0	112.714	2
chr12.77984641.77984760	chr12	77984641	77984760	*	8.23433e-10	2.77558e-09	25.0342	Fntb	0	0	1	1964	46189	NM_145927	+	FALSE	0	0	50.7143	3
chr12.78055801.78055920	chr12	78055801	78055920	*	0	0	26.5376	Max	0	0	1	1965	7316	NM_001146176	-	FALSE	0	0	110	1
chr12.78056041.78056160	chr12	78056041	78056160	*	0	0	28.4412	Max	0	0	1	1966	7076	NM_001146176	-	FALSE	0	0	130.714	1
chr12.78056161.78056280	chr12	78056161	78056280	*	0	0	27.0345	Max	0	0	1	1967	6956	NM_001146176	-	FALSE	0	0	360	5
chr12.78102001.78102120	chr12	78102001	78102120	*	0	0	31.8179	NA	0	0	0	1968	-38767	NM_008558	-	FALSE	0	0	74.5714	1
chr12.78102121.78102240	chr12	78102121	78102240	*	0	0	33.9028	NA	0	0	0	1969	-38887	NM_008558	-	FALSE	0	0	96	2
chr12.78105841.78105960	chr12	78105841	78105960	*	0	0	30.446	NA	0	0	0	1970	-42607	NM_008558	-	FALSE	0	0	131.286	2
chr12.78110041.78110160	chr12	78110041	78110160	*	0	0	-26.5997	NA	0	0	0	1971	-46807	NM_008558	-	FALSE	0	0	96	2
chr12.78162481.78162600	chr12	78162481	78162600	*	0	0	30.8368	NA	0	0	0	1972	-99247	NM_008558	-	FALSE	0	0	215.286	2
chr12.78166921.78167040	chr12	78166921	78167040	*	0	0	-26.821	NA	0	0	0	1973	-103687	NM_008558	-	FALSE	0	0	237.571	2
chr12.80081521.80081640	chr12	80081521	80081640	*	1.66755e-13	8.66827e-13	-26.4318	Tmem229b	0	0	1	1974	2826	NM_001170401	-	TRUE	0	0	70.7143	1
chr12.80084521.80084640	chr12	80084521	80084640	*	5.21916e-13	2.56527e-12	25.0685	Tmem229b	1	0	1	1975	-57	NM_001170401	-	TRUE	0	0	70.8571	1
chr12.80084641.80084760	chr12	80084641	80084760	*	4.10783e-14	2.27502e-13	26.1201	Tmem229b	1	0	1	1976	-177	NM_001170401	-	TRUE	0	0	73	1
chr12.80274841.80274960	chr12	80274841	80274960	*	0	0	29.7327	NA	0	0	0	1977	-1397	NM_016800	-	FALSE	0	1	73.4286	1
chr12.80699521.80699640	chr12	80699521	80699640	*	0	0	33.1277	Rad51l1	0	0	1	1978	301185	NM_001252562	+	FALSE	0	0	116.571	1
chr12.80699641.80699760	chr12	80699641	80699760	*	0	0	28.4339	Rad51l1	0	0	1	1979	301305	NM_001252562	+	FALSE	0	0	432	2
chr12.80699881.80700000	chr12	80699881	80700000	*	0	0	33.7033	Rad51l1	0	0	1	1980	301545	NM_001252562	+	FALSE	0	0	109	1
chr12.80833441.80833560	chr12	80833441	80833560	*	5.92841e-11	2.30133e-10	25.8877	Rad51l1	0	0	1	1981	380441	NM_007564	-	FALSE	0	0	52	2
chr12.80938801.80938920	chr12	80938801	80938920	*	0	0	26.1092	NA	0	0	0	1982	275081	NM_007564	-	FALSE	0	0	106.429	1
chr12.80938921.80939040	chr12	80938921	80939040	*	0	0	26.7113	NA	0	0	0	1983	274961	NM_007564	-	FALSE	0	0	136.571	3
chr12.81045961.81046080	chr12	81045961	81046080	*	4.21885e-14	2.33305e-13	28.6024	NA	0	0	0	1984	167921	NM_007564	-	FALSE	0	0	53.5714	2
chr12.81068161.81068280	chr12	81068161	81068280	*	0	0	25.687	NA	0	0	0	1985	145721	NM_007564	-	FALSE	0	0	142.143	2
chr12.81211201.81211320	chr12	81211201	81211320	*	0	0	27.8458	Zfp36l1	0	1	0	1986	2681	NM_007564	-	FALSE	1	0	204.286	9
chr12.81232561.81232680	chr12	81232561	81232680	*	2.77556e-15	1.72869e-14	-26.1142	2310015A10Rik	0	0	1	1987	1152	NR_033514	-	TRUE	0	1	74.8571	1
chr12.81309601.81309720	chr12	81309601	81309720	*	0	0	31.7359	Actn1	0	0	1	1988	51639	NM_134156	-	FALSE	0	0	127.143	6
chr12.81317281.81317400	chr12	81317281	81317400	*	0	0	27.4114	Actn1	0	0	1	1989	43959	NM_134156	-	FALSE	0	0	169.429	2
chr12.81317401.81317520	chr12	81317401	81317520	*	0	0	31.2209	Actn1	0	0	1	1990	43839	NM_134156	-	FALSE	0	0	88.1429	1
chr12.81324601.81324720	chr12	81324601	81324720	*	0	0	31.0156	Actn1	0	0	1	1991	36639	NM_134156	-	FALSE	0	0	133.857	2
chr12.81332041.81332160	chr12	81332041	81332160	*	0	0	28.0635	Actn1	0	0	1	1992	29199	NM_134156	-	FALSE	0	0	196.571	2
chr12.81362401.81362520	chr12	81362401	81362520	*	0	0	28.2353	NA	0	0	0	1993	-1044	NM_134156	-	FALSE	0	1	60.4286	3
chr12.81716881.81717000	chr12	81716881	81717000	*	6.07736e-13	2.96301e-12	26.4395	NA	0	0	0	1994	27849	NM_007951	-	FALSE	0	0	61.4286	1
chr12.81913321.81913440	chr12	81913321	81913440	*	0	0	29.0103	4933426M11Rik	0	0	1	1995	21804	NM_001242419	+	FALSE	0	0	54.2857	1
chr12.81944761.81944880	chr12	81944761	81944880	*	0	0	27.0638	4933426M11Rik	0	0	1	1996	53244	NM_001242419	+	FALSE	0	0	179.143	2
chr12.82027201.82027320	chr12	82027201	82027320	*	1.95556e-11	8.03806e-11	27.2907	NA	0	0	0	1997	-1768	NR_033786	-	FALSE	0	0	53.8571	1
chr12.82209481.82209600	chr12	82209481	82209600	*	0	0	28.0929	Smoc1	0	0	1	1998	-57538	NR_037227	+	FALSE	0	0	127.857	3
chr12.82209601.82209720	chr12	82209601	82209720	*	0	0	38.3599	Smoc1	0	0	1	1999	-57418	NR_037227	+	FALSE	0	0	95	2
[truncated: 6,885 more rows]

## Sheet: Diff.Methylation Early
id	chr	start	end	strand	pvalue	qvalue	meth.diff	Gene.annotate	prom	exon	intron	dist.to.feature	feature.name	feature.strand	Upstream.promoter.indicator	CpGi	shores	coverage	No.CpG.window
chr10.100165081.100165200	chr10	100165081	100165200	*	2.79016e-07	9.98583e-07	-28.8038	NA	0	0	0	110063	NM_001081246	+	FALSE	0	0	30.6667	1
chr10.104936881.104937000	chr10	104936881	104937000	*	0	0	-29.3928	Tmtc2	0	0	1	74536	NM_177368	-	FALSE	0	0	54.8333	1
chr10.107377321.107377440	chr10	107377321	107377440	*	6.21725e-15	8.04416e-14	-35.7072	NA	0	0	0	-28132	NM_001177567	-	FALSE	0	0	45.5	3
chr10.107480641.107480760	chr10	107480641	107480760	*	1.84972e-08	8.36234e-08	-28.497	NA	0	0	0	-118696	NM_027892	+	FALSE	0	0	36.6667	1
chr10.107550841.107550960	chr10	107550841	107550960	*	0	0	-27.9845	NA	0	0	0	-48496	NM_027892	+	FALSE	0	0	207.833	5
chr10.109102441.109102560	chr10	109102441	109102560	*	5.21281e-09	2.6076e-08	29.2505	NA	0	0	0	334716	NM_001081035	-	FALSE	0	0	36.3333	2
chr10.110315761.110315880	chr10	110315761	110315880	*	0	0	-25.6035	NA	0	0	1	17684	NR_045979	-	FALSE	0	0	121.167	2
chr10.110337121.110337240	chr10	110337121	110337240	*	0	0	-32.2654	NA	0	0	0	-3559	NR_045979	-	FALSE	0	0	57.3333	2
chr10.110544721.110544840	chr10	110544721	110544840	*	0	0	46.3287	NA	0	0	0	-57018	NM_175489	+	FALSE	0	0	72.8333	3
chr10.110908561.110908680	chr10	110908561	110908680	*	2.34109e-11	1.7667e-10	-31.3189	NA	0	0	0	-1568	NM_015781	+	FALSE	0	1	43.6667	1
chr10.110958841.110958960	chr10	110958841	110958960	*	1.66533e-14	2.03397e-13	-28.5713	NA	0	0	0	15501	NM_009344	+	FALSE	0	0	71.1667	1
chr10.111045961.111046080	chr10	111045961	111046080	*	1.38863e-11	1.08785e-10	-26.9725	NA	0	0	0	-14633	NR_045344	-	FALSE	0	0	55	2
chr10.111113401.111113520	chr10	111113401	111113520	*	1.60989e-11	1.24778e-10	-25.6491	NA	0	0	0	-82073	NR_045344	-	FALSE	0	0	65.1667	1
chr10.111137041.111137160	chr10	111137041	111137160	*	1.22125e-15	1.7405e-14	-32.6526	NA	0	0	0	-105713	NR_045344	-	FALSE	0	0	50	1
chr10.111828721.111828840	chr10	111828721	111828840	*	3.49276e-13	3.51219e-12	-27.3065	Kcnc2	0	0	1	120544	NM_001025581	+	FALSE	0	0	61.6667	1
chr10.112366441.112366560	chr10	112366441	112366560	*	8.51346e-08	3.38635e-07	-29.8719	NA	1	0	0	-360	NM_001033474	-	TRUE	0	1	30.5	1
chr10.11366161.11366280	chr10	11366161	11366280	*	7.05711e-07	2.32135e-06	29.778	NA	0	0	0	302920	NM_010146	+	FALSE	0	0	26.5	1
chr10.114622201.114622320	chr10	114622201	114622320	*	7.07212e-14	7.89555e-13	-27.4037	NA	1	0	0	-124	NM_173391	-	TRUE	0	0	81.5	4
chr10.116368201.116368320	chr10	116368201	116368320	*	0	0	28.097	Rab3ip	0	0	1	19117	NM_001003950	-	FALSE	0	0	109.667	3
chr10.116583961.116584080	chr10	116583961	116584080	*	8.3595e-11	5.73593e-10	25.8756	Frs2	0	0	1	1451	NM_177798	-	FALSE	0	1	49.1667	3
chr10.116957281.116957400	chr10	116957281	116957400	*	5.91906e-10	3.51049e-09	-36.2975	Kifc5c	0	0	0	-109156	NM_027468	+	FALSE	0	0	27.5	1
chr10.117065041.117065160	chr10	117065041	117065160	*	3.82165e-09	1.95886e-08	-31.4659	NA	0	0	0	-1396	NM_027468	+	FALSE	0	1	25.8333	1
chr10.117615721.117615840	chr10	117615721	117615840	*	7.36883e-10	4.29436e-09	28.8634	NA	0	0	0	-26180	NM_016971	+	FALSE	0	0	43	1
chr10.118038121.118038240	chr10	118038121	118038240	*	1.46883e-13	1.56225e-12	-30.0654	NA	0	0	0	160020	NM_008337	+	FALSE	0	0	29.6667	1
chr10.118492201.118492320	chr10	118492201	118492320	*	0	0	-28.2045	NA	0	0	0	-37641	NR_045348	+	FALSE	0	0	511.5	3
chr10.119674441.119674560	chr10	119674441	119674560	*	5.55112e-16	8.28013e-15	-30.9169	NA	0	0	0	10327	NM_025431	+	FALSE	0	0	63.8333	4
chr10.119745841.119745960	chr10	119745841	119745960	*	0	0	-34.8553	NA	0	0	0	-80619	NR_040626	+	FALSE	0	0	88	1
chr10.119866321.119866440	chr10	119866321	119866440	*	0	0	-39.2391	Hmga2	0	0	1	18727	NR_030434	-	FALSE	0	0	61.5	4
chr10.119958841.119958960	chr10	119958841	119958960	*	4.65949e-06	1.28378e-05	-26.3916	NA	0	0	0	-44851	NM_010441	-	FALSE	0	0	27.3333	1
chr10.120041641.120041760	chr10	120041641	120041760	*	0	0	-40.6699	NA	0	0	0	-127651	NM_010441	-	FALSE	0	0	91.5	2
chr10.120047281.120047400	chr10	120047281	120047400	*	0	0	-26.2334	NA	0	0	0	-133291	NM_010441	-	FALSE	0	0	122.5	5
chr10.120832921.120833040	chr10	120832921	120833040	*	0	0	-31.5226	Gns	0	1	0	30777	NM_029364	+	FALSE	0	0	122.167	3
chr10.120947041.120947160	chr10	120947041	120947160	*	1.53918e-07	5.81061e-07	-25.8079	NA	0	0	0	-33736	NM_138956	-	FALSE	0	0	40	1
chr10.121126921.121127040	chr10	121126921	121127040	*	0	0	-50.728	D930020B18Rik	0	1	1	48166	NM_177335	+	FALSE	0	0	72.6667	3
chr10.121168201.121168320	chr10	121168201	121168320	*	3.2781e-10	2.03526e-09	27.0816	NA	0	0	0	-8673	NM_173022	+	FALSE	0	0	51.5	1
chr10.121168321.121168440	chr10	121168321	121168440	*	1.07849e-09	6.10674e-09	25.92	NA	0	0	0	-8553	NM_173022	+	FALSE	0	0	57.3333	1
chr10.121179721.121179840	chr10	121179721	121179840	*	4.25175e-07	1.4662e-06	-25.4564	BC048403	0	0	1	2730	NM_173022	+	FALSE	0	0	34.5	1
chr10.121443721.121443840	chr10	121443721	121443840	*	0	0	-28.7507	Srgap1	0	0	1	40532	NM_001242411	-	FALSE	0	0	95	3
chr10.122237761.122237880	chr10	122237761	122237880	*	0	0	28.9761	Ppm1h	0	0	1	121945	NM_001110218	+	FALSE	0	1	172.5	2
chr10.122239681.122239800	chr10	122239681	122239800	*	1.02141e-14	1.28528e-13	-25.5657	Ppm1h	0	0	1	123865	NM_001110218	+	FALSE	0	1	85.8333	3
chr10.122323561.122323680	chr10	122323561	122323680	*	6.66134e-16	9.83807e-15	-30.4077	Ppm1h	0	0	1	99101	NR_029527	-	FALSE	0	0	45	1
chr10.122350201.122350320	chr10	122350201	122350320	*	0	0	-25.7814	Ppm1h	0	0	1	72461	NR_029527	-	FALSE	0	0	122.667	2
chr10.124931881.124932000	chr10	124931881	124932000	*	0	0	-31.0105	NA	0	0	0	-166291	NM_011391	-	FALSE	0	0	63.6667	1
chr10.12511801.12511920	chr10	12511801	12511920	*	0	0	-41.5937	Utrn	0	0	1	69614	NM_011682	-	FALSE	0	0	97.8333	2
chr10.125276401.125276520	chr10	125276401	125276520	*	4.54197e-10	2.74963e-09	-28.7611	NA	0	0	0	-126755	NM_177152	+	FALSE	0	0	42.6667	1
chr10.125968321.125968440	chr10	125968321	125968440	*	5.76171e-08	2.36773e-07	-26.6261	NA	0	0	0	369988	NM_001159559	-	FALSE	0	0	38.6667	1
chr10.125968441.125968560	chr10	125968441	125968560	*	7.38098e-08	2.97179e-07	-29.0468	NA	0	0	0	369868	NM_001159559	-	FALSE	0	0	32.8333	1
chr10.126115561.126115680	chr10	126115561	126115680	*	0	0	-30.5743	NA	0	0	0	222748	NM_001159559	-	FALSE	0	0	123	4
chr10.126418561.126418680	chr10	126418561	126418680	*	2.71904e-10	1.71052e-09	-25.6527	Ctdsp2	0	0	1	2790	NM_001113470	+	FALSE	0	1	50.8333	1
chr10.126513121.126513240	chr10	126513121	126513240	*	7.60417e-08	3.05272e-07	26.4599	NA	0	0	0	-2723	NM_001033263	+	FALSE	0	0	37	1
chr10.126518521.126518640	chr10	126518521	126518640	*	0	0	-40.8301	Agap2	0	0	1	2560	NM_001033263	+	FALSE	1	1	181.167	9
chr10.126607201.126607320	chr10	126607201	126607320	*	0	0	-27.811	B4galnt1	0	1	1	4316	NM_001244618	+	FALSE	0	1	308.833	6
chr10.126633361.126633480	chr10	126633361	126633480	*	0	0	-31.1413	F420014N23Rik	1	0	1	-597	NM_030714	-	TRUE	0	1	52.8333	2
chr10.126705601.126705720	chr10	126705601	126705720	*	1.09853e-09	6.21214e-09	-26.3474	Dctn2	0	0	1	2285	NM_001190454	+	FALSE	0	1	48.8333	2
chr10.126760801.126760920	chr10	126760801	126760920	*	0	0	25.0193	Arhgap9	1	1	1	20	NM_146011	+	TRUE	0	0	109.833	4
chr10.126763561.126763680	chr10	126763561	126763680	*	0	0	-25.3962	Arhgap9	0	1	1	2780	NM_146011	+	TRUE	1	0	337.167	11
chr10.126763801.126763920	chr10	126763801	126763920	*	0	0	-52.0634	Arhgap9	0	0	1	3020	NM_146011	+	FALSE	1	0	88.8333	5
chr10.126952561.126952680	chr10	126952561	126952680	*	3.33751e-10	2.06855e-09	-26.0821	Ndufa4l2	1	0	1	568	NM_001098789	+	TRUE	0	0	48.1667	2
chr10.127055641.127055760	chr10	127055641	127055760	*	0	0	-28.2769	Lrp1	0	0	1	2445	NM_008512	-	FALSE	0	0	108.5	2
chr10.127073881.127074000	chr10	127073881	127074000	*	1.02893e-10	6.9527e-10	-26.9772	NA	0	0	0	-6042	NM_009284	+	FALSE	0	0	56.6667	2
chr10.127518841.127518960	chr10	127518841	127518960	*	1.95355e-12	1.75195e-11	-27.9656	NA	0	0	0	-1403	NM_016774	+	FALSE	0	1	50.8333	1
chr10.127664761.127664880	chr10	127664761	127664880	*	3.02141e-10	1.88695e-09	-25.472	Mip	0	1	1	1869	NM_008600	+	FALSE	0	0	41.5	1
chr10.127802401.127802520	chr10	127802401	127802520	*	0	0	-39.2103	Coq10a	0	0	1	4574	NM_001081040	-	FALSE	0	0	66.3333	1
chr10.12780721.12780840	chr10	12780721	12780840	*	0	0	-32.2479	NA	0	0	0	-29754	NM_009538	+	TRUE	1	1	103.667	10
chr10.127834681.127834800	chr10	127834681	127834800	*	3.38738e-11	2.48621e-10	-31.9995	Slc39a5	0	1	1	2723	NM_028051	-	FALSE	0	0	42.1667	1
chr10.128020681.128020800	chr10	128020681	128020800	*	0	0	-33.4297	Erbb3	0	1	1	5758	NM_010153	-	FALSE	0	0	285.833	3
chr10.16933801.16933920	chr10	16933801	16933920	*	1.35481e-12	1.24522e-11	-31.1011	NA	0	0	0	-118214	NR_038020	-	FALSE	0	0	45.1667	1
chr10.18221881.18222000	chr10	18221881	18222000	*	0	0	-36.9586	Nhsl1	0	0	1	32096	NM_001163592	+	FALSE	0	0	45.5	1
chr10.18245641.18245760	chr10	18245641	18245760	*	8.88593e-11	6.06952e-10	-29.1268	Nhsl1	0	1	0	20123	NM_019487	-	FALSE	0	0	46.8333	2
chr10.18247321.18247440	chr10	18247321	18247440	*	0	0	25.9855	Nhsl1	0	1	1	18443	NM_019487	-	FALSE	0	0	182.5	3
chr10.18928201.18928320	chr10	18928201	18928320	*	0	0	-31.1224	NA	0	0	0	41159	NR_038022	+	FALSE	0	0	143.333	1
chr10.19079521.19079640	chr10	19079521	19079640	*	0	0	-33.608	NA	0	0	0	3178	NM_053008	+	FALSE	0	0	58.3333	1
chr10.19079641.19079760	chr10	19079641	19079760	*	8.8835e-05	0.000180957	-25.8814	NA	0	0	0	3298	NM_053008	+	FALSE	0	0	22.1667	1
chr10.19766161.19766280	chr10	19766161	19766280	*	1.72275e-10	1.12161e-09	-25.2137	Map3k5	0	1	1	-102446	NM_008635	+	FALSE	0	0	56.3333	1
chr10.19766281.19766400	chr10	19766281	19766400	*	0	0	-27.0509	Map3k5	0	1	1	-102326	NM_008635	+	FALSE	0	0	91.3333	2
chr10.19797001.19797120	chr10	19797001	19797120	*	1.11022e-16	1.78722e-15	-35.338	Map3k5	0	0	1	-71606	NM_008635	+	FALSE	0	0	44.1667	1
chr10.19898521.19898640	chr10	19898521	19898640	*	7.86818e-07	2.56237e-06	-27.1355	Mtap7	0	0	1	23021	NR_045350	-	FALSE	0	0	33.5	1
chr10.20157361.20157480	chr10	20157361	20157480	*	2.22933e-13	2.30775e-12	27.9214	Pde7b	0	0	1	89738	NM_027930	+	FALSE	0	0	68.5	1
chr10.20352241.20352360	chr10	20352241	20352360	*	5.82867e-14	6.58564e-13	-31.524	Pde7b	0	0	1	92515	NM_013875	-	FALSE	0	0	56.3333	2
chr10.20674201.20674320	chr10	20674201	20674320	*	0	0	-57.934	Ahi1	0	0	1	1850	NM_026203	+	FALSE	0	1	164	16
chr10.21083281.21083400	chr10	21083281	21083400	*	0	0	25.7714	Hbs1l	0	0	1	-13706	NM_178713	+	FALSE	0	0	586.5	3
chr10.21119881.21120000	chr10	21119881	21120000	*	9.04943e-13	8.55699e-12	-25.0493	NA	0	0	0	22777	NM_178713	+	FALSE	0	0	68.3333	1
chr10.21555241.21555360	chr10	21555241	21555360	*	0	0	-30.7273	NA	0	0	0	-46630	NM_001161845	+	FALSE	0	0	58.5	1
chr10.23615521.23615640	chr10	23615521	23615640	*	9.31148e-10	5.33084e-09	-27.5172	Vnn1	0	0	1	1029	NM_011704	+	FALSE	0	0	39	1
chr10.23657881.23658000	chr10	23657881	23658000	*	4.08486e-10	2.49181e-09	-26.7053	NA	1	0	0	-378	NM_001007266	+	TRUE	0	0	42.1667	2
chr10.23680561.23680680	chr10	23680561	23680680	*	0	0	30.9542	Taar4	1	1	0	263	NM_001008499	+	TRUE	0	0	65.6667	3
chr10.24099361.24099480	chr10	24099361	24099480	*	1.10449e-09	6.24313e-09	-30.8452	NA	0	0	0	156040	NM_021509	+	FALSE	0	0	39	1
chr10.24316681.24316800	chr10	24316681	24316800	*	1.33116e-13	1.42564e-12	-27.974	Ctgf	0	1	1	1435	NM_010217	+	FALSE	0	1	60.1667	3
chr10.24355801.24355920	chr10	24355801	24355920	*	0	0	28.1969	NA	0	0	0	40555	NM_010217	+	FALSE	0	0	301.333	6
chr10.24451081.24451200	chr10	24451081	24451200	*	2.22045e-15	3.06368e-14	-40.7424	NA	0	0	0	-19174	NM_008813	-	FALSE	0	0	31.8333	1
chr10.24860041.24860160	chr10	24860041	24860160	*	5.81757e-14	6.57403e-13	-28.1331	NA	0	0	0	158810	NM_018747	-	FALSE	0	0	68.5	3
chr10.25152241.25152360	chr10	25152241	25152360	*	0	0	-36.0822	Epb4.1l2	0	0	1	24069	NM_013511	+	FALSE	0	0	118.333	2
chr10.27905401.27905520	chr10	27905401	27905520	*	0	0	-28.4524	Ptprk	0	0	1	110777	NM_008983	+	FALSE	0	0	89	1
chr10.3154681.3154800	chr10	3154681	3154800	*	0	0	-28.6373	Cnksr3	0	0	1	20379	NM_172546	+	FALSE	0	0	74.6667	1
chr10.38883001.38883120	chr10	38883001	38883120	*	0	0	-28.7364	Wisp3	1	0	1	481	NM_001127376	-	TRUE	0	0	89.6667	7
chr10.39872041.39872160	chr10	39872041	39872160	*	5.15143e-14	5.86782e-13	-35.6586	NA	0	0	0	-9982	NM_001114332	-	FALSE	0	0	39.8333	1
chr10.40070761.40070880	chr10	40070761	40070880	*	0	0	26.2518	Cdk19	0	0	1	1649	NM_001168304	+	FALSE	0	1	124.333	3
chr10.40171801.40171920	chr10	40171801	40171920	*	0	0	26.2294	Cdk19	0	0	1	102689	NM_001168304	+	FALSE	0	0	221.667	3
chr10.40478281.40478400	chr10	40478281	40478400	*	5.27356e-14	5.99808e-13	-33.3641	9030224M15Rik	0	0	1	75195	NM_177793	+	FALSE	0	0	40.8333	1
chr10.40601161.40601280	chr10	40601161	40601280	*	0	0	-36.6463	Cdc40	0	0	1	1670	NM_027879	-	FALSE	0	1	107.333	1
chr10.40924441.40924560	chr10	40924441	40924560	*	0	0	-39.1967	Fig4	0	0	1	98488	NM_133999	-	FALSE	0	0	43.6667	3
chr10.41525761.41525880	chr10	41525761	41525880	*	5.00297e-10	3.00439e-09	-30.2869	2410017P07Rik	0	0	1	3590	NM_029132	-	FALSE	0	0	34.8333	1
chr10.41927521.41927640	chr10	41927521	41927640	*	0	0	-26.8924	Foxo3	0	0	1	68909	NM_019740	-	FALSE	0	0	124.5	4
chr10.41970841.41970960	chr10	41970841	41970960	*	3.84005e-09	1.96758e-08	-25.8458	Foxo3	0	0	1	25589	NM_019740	-	FALSE	0	0	47	1
chr10.41970961.41971080	chr10	41970961	41971080	*	0	0	-25.2017	Foxo3	0	0	1	25469	NM_019740	-	FALSE	0	0	148.833	3
chr10.42028441.42028560	chr10	42028441	42028560	*	3.01911e-11	2.23558e-10	-25.8631	NA	0	0	0	-31894	NM_019740	-	FALSE	0	0	48.6667	1
chr10.42569161.42569280	chr10	42569161	42569280	*	9.61335e-08	3.78236e-07	-27.0385	NA	0	0	0	-11038	NM_172938	+	FALSE	0	0	38.3333	1
chr10.42584401.42584520	chr10	42584401	42584520	*	0	0	-28.3728	Scml4	0	0	1	4085	NM_172938	+	FALSE	0	0	117.167	3
chr10.42678721.42678840	chr10	42678721	42678840	*	1.23611e-05	3.09133e-05	-27.7729	Scml4	0	1	0	98405	NM_172938	+	FALSE	0	0	23	1
chr10.42763321.42763440	chr10	42763321	42763440	*	0	0	-34.8107	Sobp	0	0	1	130897	NM_175407	-	FALSE	0	0	56.5	1
chr10.43462561.43462680	chr10	43462561	43462680	*	3.85589e-09	1.97509e-08	-26.8887	NA	0	0	0	-3284	NR_040581	+	FALSE	0	0	30.8333	3
chr10.43639201.43639320	chr10	43639201	43639320	*	2.99372e-12	2.60059e-11	-33.4286	Rtn4ip1	0	0	1	17590	NM_130892	+	FALSE	0	0	36.8333	3
chr10.43713001.43713120	chr10	43713001	43713120	*	7.54952e-15	9.66086e-14	-31.8812	Aim1	0	0	1	11533	NM_172393	-	FALSE	0	0	62.6667	1
chr10.44129881.44130000	chr10	44129881	44130000	*	0	0	31.8718	NA	0	0	0	48494	NM_007548	-	FALSE	0	0	216.333	4
chr10.44475241.44475360	chr10	44475241	44475360	*	0	0	-42.5005	NA	0	0	0	-296749	NM_007548	-	FALSE	0	0	194.667	2
chr10.44475361.44475480	chr10	44475361	44475480	*	0	0	-25.7355	NA	0	0	0	-296869	NM_007548	-	FALSE	0	0	237	2
chr10.44913481.44913600	chr10	44913481	44913600	*	7.16583e-11	4.97684e-10	-25.3648	NA	0	0	0	-95511	NM_024286	+	FALSE	0	0	57.6667	2
chr10.45527401.45527520	chr10	45527401	45527520	*	0	0	-44.7198	NA	1	1	0	0	NR_040624	+	FALSE	0	0	69	2
chr10.5118841.5118960	chr10	5118841	5118960	*	0	0	-37.8155	Syne1	0	0	0	-32874	NM_001079686	+	FALSE	0	0	106	3
chr10.5238001.5238120	chr10	5238001	5238120	*	7.50397e-10	4.36684e-09	35.8261	Syne1	0	1	1	-39358	NM_022027	+	TRUE	0	0	26.8333	1
chr10.53182561.53182680	chr10	53182561	53182680	*	0	0	-38.356	NA	0	0	0	56116	NR_037973	-	FALSE	0	0	54	1
chr10.57834361.57834480	chr10	57834361	57834480	*	0	0	34.8717	Lims1	1	1	1	161	NM_201242	+	TRUE	0	0	169	5
chr10.57835201.57835320	chr10	57835201	57835320	*	0	0	34.3066	Lims1	1	0	1	1001	NM_201242	+	TRUE	0	0	56.3333	2
chr10.58064041.58064160	chr10	58064041	58064160	*	7.77156e-16	1.13822e-14	-27.5307	Edar	0	1	0	74285	NM_010100	-	FALSE	0	0	83.8333	2
chr10.5863921.5864040	chr10	5863921	5864040	*	7.21645e-15	9.26039e-14	-33.3763	NA	0	0	0	-27253	NM_001195672	-	FALSE	0	0	48.5	4
chr10.5864881.5865000	chr10	5864881	5865000	*	0	0	-30.3321	NA	0	0	0	-28213	NM_001195672	-	FALSE	0	0	132.833	1
chr10.58759321.58759440	chr10	58759321	58759440	*	1.14721e-07	4.44406e-07	-25.6245	NA	0	0	0	-26604	NM_011030	+	FALSE	0	0	42.5	1
chr10.58821601.58821720	chr10	58821601	58821720	*	1.5194e-09	8.38188e-09	-26.9002	P4ha1	0	0	1	35559	NM_011030	+	FALSE	0	0	34.8333	2
chr10.59000401.59000520	chr10	59000401	59000520	*	0	0	-29.3719	Ccdc109a	0	0	1	78921	NM_001033259	-	FALSE	0	0	296.5	3
chr10.59052481.59052600	chr10	59052481	59052600	*	0	0	27.725	Ccdc109a	0	0	1	26841	NM_001033259	-	FALSE	0	0	144	3
chr10.5914681.5914800	chr10	5914681	5914800	*	3.43409e-11	2.5174e-10	32.0106	Rmnd1	1	0	1	494	NM_025343	+	TRUE	0	1	36.5	1
chr10.59406361.59406480	chr10	59406361	59406480	*	0	0	-33.2437	NA	0	0	0	8039	NM_029083	-	FALSE	0	0	110.667	4
chr10.59420761.59420880	chr10	59420761	59420880	*	0	0	-31.7224	NA	0	0	0	-6244	NM_029083	-	FALSE	0	0	113.167	2
chr10.59428081.59428200	chr10	59428081	59428200	*	0	0	-35.7277	NA	0	0	0	-13564	NM_029083	-	FALSE	0	0	73.8333	4
chr10.59682721.59682840	chr10	59682721	59682840	*	0	0	28.0547	NA	1	0	0	-714	NM_016803	-	TRUE	0	1	91.3333	2
chr10.60277321.60277440	chr10	60277321	60277440	*	1.71785e-07	6.42312e-07	-29.5057	c("Unc5b", "LOC100503834")	0	0	1	16890	NM_029770	-	FALSE	0	0	28	1
chr10.60415441.60415560	chr10	60415441	60415560	*	0	0	-35.3856	NA	0	0	0	-14562	NR_033616	-	FALSE	0	0	66.5	3
chr10.60454441.60454560	chr10	60454441	60454560	*	0	0	-40.2439	NA	0	0	0	-39491	NR_040638	+	FALSE	0	0	50.1667	1
chr10.60486241.60486360	chr10	60486241	60486360	*	2.94648e-08	1.28182e-07	-27.9786	NA	0	0	0	-7691	NR_040638	+	FALSE	0	0	36.6667	1
chr10.60828601.60828720	chr10	60828601	60828720	*	0	0	-41.5686	X99384	0	0	1	17552	NM_013753	-	FALSE	0	0	36.5	1
chr10.60844081.60844200	chr10	60844081	60844200	*	0	0	31.0724	X99384	0	0	1	2072	NM_013753	-	FALSE	0	1	95.3333	2
chr10.60865801.60865920	chr10	60865801	60865920	*	0	0	-32.9378	NA	0	0	0	-14800	NM_013611	+	FALSE	0	0	64	1
chr10.60999721.60999840	chr10	60999721	60999840	*	0	0	-35.7627	Lrrc20	0	0	1	-58392	NM_001177511	+	FALSE	0	0	64.3333	2
chr10.61483081.61483200	chr10	61483081	61483200	*	5.15233e-11	3.66552e-10	-29.3607	NA	0	0	0	-41226	NM_007731	-	FALSE	0	0	45.8333	1
chr10.61572601.61572720	chr10	61572601	61572720	*	0	0	-25.5957	2010107G23Rik	0	1	1	1042	NM_027251	-	FALSE	0	1	100.333	3
chr10.61777441.61777560	chr10	61777441	61777560	*	8.31557e-14	9.18652e-13	-34.9687	Hk1	0	0	1	25610	NM_001146100	-	FALSE	0	0	32.1667	1
chr10.62016841.62016960	chr10	62016841	62016960	*	3.33067e-16	5.10257e-15	28.2857	NA	0	0	0	24246	NM_028197	-	FALSE	0	0	77.8333	2
chr10.62127841.62127960	chr10	62127841	62127960	*	0	0	30.764	Stox1	0	1	0	-13896	NM_053183	-	FALSE	0	0	114.333	7
chr10.62367481.62367600	chr10	62367481	62367600	*	1.77636e-15	2.48184e-14	-39.3434	NA	0	0	0	-15781	NM_175194	+	FALSE	0	0	30.1667	2
chr10.62552161.62552280	chr10	62552161	62552280	*	0	0	28.2352	NA	0	0	0	-10624	NM_016864	+	FALSE	0	0	90.6667	2
chr10.62598601.62598720	chr10	62598601	62598720	*	9.76996e-15	1.23225e-13	-32.7644	Mypn	0	1	0	35699	NM_016864	+	FALSE	0	0	41.3333	4
chr10.62627521.62627640	chr10	62627521	62627640	*	0	0	-33.9739	Mypn	0	0	1	39061	NM_182992	-	FALSE	0	0	58.6667	3
chr10.62687161.62687280	chr10	62687161	62687280	*	0	0	-26.8998	NA	0	0	0	-19265	NM_030114	+	FALSE	0	0	141	3
chr10.6304441.6304560	chr10	6304441	6304560	*	0	0	-28.5158	Mthfd1l	0	0	1	68907	NM_001170785	-	FALSE	0	0	113.333	1
chr10.63152521.63152640	chr10	63152521	63152640	*	5.64437e-13	5.50152e-12	-27.0536	Ctnna3	0	0	1	-131163	NM_001164519	+	FALSE	0	0	48	2
chr10.66374041.66374160	chr10	66374041	66374160	*	0	0	-30.6084	NA	0	0	0	185577	NM_001204915	-	FALSE	0	0	158.167	5
chr10.66391081.66391200	chr10	66391081	66391200	*	0	0	-29.8613	NA	0	0	0	168537	NM_001204915	-	FALSE	0	0	82.1667	2
chr10.66792481.66792600	chr10	66792481	66792600	*	1.62093e-14	1.98216e-13	-29.9165	NA	0	0	0	-44453	NM_001036293	-	FALSE	0	0	64	3
chr10.67552681.67552800	chr10	67552681	67552800	*	0	0	-27.8679	NA	0	0	0	110337	NM_001081346	+	FALSE	0	0	101.167	1
chr10.67589041.67589160	chr10	67589041	67589160	*	0	0	-38.0553	Arid5b	0	0	1	146697	NM_001081346	+	FALSE	0	0	58.5	1
chr10.67597681.67597800	chr10	67597681	67597800	*	5.03356e-09	2.52553e-08	-25.1938	Arid5b	0	1	1	143675	NM_023598	-	FALSE	0	0	38.3333	1
chr10.67597921.67598040	chr10	67597921	67598040	*	0	0	-47.8943	Arid5b	0	0	1	143435	NM_023598	-	FALSE	0	0	51.1667	1
chr10.69046801.69046920	chr10	69046801	69046920	*	0	0	-32.4174	Ank3	0	0	1	50347	NM_170689	+	FALSE	0	0	183.167	2
chr10.69239881.69240000	chr10	69239881	69240000	*	0	0	-42.6763	Ank3	0	0	1	-148280	NM_170687	+	FALSE	0	0	71.6667	3
chr10.69381721.69381840	chr10	69381721	69381840	*	8.86651e-10	5.09351e-09	30.3514	Ank3	0	0	1	-6440	NM_170687	+	FALSE	0	0	32.1667	2
chr10.69583921.69584040	chr10	69583921	69584040	*	0	0	-27.0124	Ccdc6	0	0	1	24054	NM_001111121	+	FALSE	0	0	96.3333	3
chr10.69601201.69601320	chr10	69601201	69601320	*	8.77076e-15	1.1132e-13	-25.671	Ccdc6	0	0	1	41334	NM_001111121	+	FALSE	0	0	66.6667	1
chr10.69786241.69786360	chr10	69786241	69786360	*	0	0	-27.9306	NA	0	0	0	78219	NM_025807	+	FALSE	0	0	111.5	1
chr10.70521361.70521480	chr10	70521361	70521480	*	0	0	-27.6825	Bicc1	0	0	1	100903	NM_031397	-	FALSE	0	0	68.1667	2
chr10.70521481.70521600	chr10	70521481	70521600	*	0	0	-25.6523	Bicc1	0	0	1	100783	NM_031397	-	FALSE	0	0	196.833	3
chr10.70521961.70522080	chr10	70521961	70522080	*	7.34073e-11	5.08724e-10	-30.8848	Bicc1	0	0	1	100303	NM_031397	-	FALSE	0	0	45.5	1
chr10.70789921.70790040	chr10	70789921	70790040	*	0	0	-35.9186	LOC100504436	0	0	0	17558	NM_134007	-	FALSE	0	0	88.1667	1
chr10.7107721.7107840	chr10	7107721	7107840	*	2.32203e-12	2.05575e-11	28.0773	NA	0	0	0	28953	NM_001204916	+	FALSE	0	0	53	2
chr10.7107841.7107960	chr10	7107841	7107960	*	2.50577e-08	1.10588e-07	29.0382	NA	0	0	0	29073	NM_001204916	+	FALSE	0	0	32.5	1
chr10.74676121.74676240	chr10	74676121	74676240	*	0	0	-26.2769	Cytsa	1	0	1	988	NM_001145826	+	TRUE	0	1	150.5	3
chr10.74745361.74745480	chr10	74745361	74745480	*	4.55191e-15	6.00602e-14	39.0683	Cytsa	0	0	1	-34208	NM_009630	+	FALSE	0	0	38.6667	1
chr10.74745481.74745600	chr10	74745481	74745600	*	0	0	34.3962	Cytsa	0	0	1	-34088	NM_009630	+	FALSE	0	0	115	1
chr10.74836561.74836680	chr10	74836561	74836680	*	0	0	-34.0476	NA	0	0	0	21763	NR_033602	+	FALSE	0	0	140.167	4
chr10.74836681.74836800	chr10	74836681	74836800	*	0	0	-46.1283	NA	0	0	0	21883	NR_033602	+	FALSE	0	0	69.6667	3
chr10.74919121.74919240	chr10	74919121	74919240	*	0	0	-36.2861	NA	0	0	1	6868	NR_045841	+	FALSE	0	0	133.167	3
chr10.74919361.74919480	chr10	74919361	74919480	*	0	0	-28.2953	NA	0	0	1	7108	NR_045841	+	FALSE	0	0	117	6
chr10.74978881.74979000	chr10	74978881	74979000	*	3.02068e-08	1.31122e-07	32.9111	1110038D17Rik	0	0	1	1068	NM_175133	-	FALSE	0	1	23.8333	1
chr10.76196401.76196520	chr10	76196401	76196520	*	5.34834e-10	3.19665e-09	-29.9126	NA	0	0	0	-7613	NM_009933	-	FALSE	0	0	43.1667	1
chr10.76365481.76365600	chr10	76365481	76365600	*	0	0	-25.0159	Pcbp3	0	0	1	59093	NM_021568	-	FALSE	0	0	257.333	2
chr10.76426681.76426800	chr10	76426681	76426800	*	7.62057e-13	7.28182e-12	-30.8803	NA	0	0	0	-1990	NM_021568	-	FALSE	0	1	52.1667	1
chr10.76426801.76426920	chr10	76426801	76426920	*	0	0	-28.893	NA	0	0	0	-2110	NM_021568	-	FALSE	0	1	148.667	3
chr10.76576201.76576320	chr10	76576201	76576320	*	0	0	-26.7753	Col18a1	1	1	1	131	NM_001109991	-	TRUE	0	0	171.667	5
chr10.76576801.76576920	chr10	76576801	76576920	*	0	0	-25.7689	Col18a1	1	0	1	-352	NM_001109991	-	TRUE	0	0	131	2
chr10.76714201.76714320	chr10	76714201	76714320	*	0	0	-36.4374	NA	0	0	0	7649	NR_026944	-	FALSE	0	0	193.667	5
chr10.7679161.7679280	chr10	7679161	7679280	*	3.87328e-11	2.81676e-10	26.7515	NA	0	0	0	-3241	NM_138667	-	FALSE	0	0	59.5	2
chr10.76829881.76830000	chr10	76829881	76830000	*	0	0	28.3219	Adarb1	0	0	1	51019	NR_004429	-	FALSE	0	0	206.667	1
chr10.76903801.76903920	chr10	76903801	76903920	*	0	0	-40.2255	LOC100503477	0	0	0	22682	NR_027377	+	FALSE	0	0	70.6667	5
chr10.76904281.76904400	chr10	76904281	76904400	*	0	0	-32.0804	LOC100503477	0	0	0	23162	NR_027377	+	FALSE	0	0	83.6667	3
chr10.77033041.77033160	chr10	77033041	77033160	*	1.66929e-09	9.14047e-09	-30.5541	NA	0	0	0	-11352	NM_145925	+	FALSE	0	0	33.3333	1
chr10.77076121.77076240	chr10	77076121	77076240	*	1.45742e-09	8.05997e-09	-26.9502	Sumo3	0	0	1	7144	NM_019929	+	FALSE	0	0	48.1667	2
chr10.77330401.77330520	chr10	77330401	77330520	*	1.15374e-11	9.15189e-11	-34.4009	C330046G03Rik	0	0	0	5683	NM_001101631	+	FALSE	0	0	35.6667	1
chr10.77939521.77939640	chr10	77939521	77939640	*	1.5099e-14	1.85378e-13	37.1974	NA	0	0	0	-11829	NM_172134	-	FALSE	0	0	39.1667	1
chr10.7806721.7806840	chr10	7806721	7806840	*	1.48437e-13	1.57738e-12	-32.2354	NA	0	0	0	-130801	NM_138667	-	FALSE	0	0	50.1667	1
chr10.79164241.79164360	chr10	79164241	79164360	*	1.62481e-10	1.06244e-09	-28.4027	NA	0	0	0	-2743	NM_009768	+	FALSE	0	0	50.1667	2
chr10.79324201.79324320	chr10	79324201	79324320	*	0	0	-40.2988	c("Ptbp1", "BC005764")	0	1	1	-6486	NR_029447	-	FALSE	0	0	98.6667	4
chr10.79344121.79344240	chr10	79344121	79344240	*	5.89238e-11	4.15263e-10	29.5048	Prtn3	0	0	1	1711	NM_011178	+	TRUE	0	1	48.8333	1
chr10.79396801.79396920	chr10	79396801	79396920	*	1.00919e-13	1.10107e-12	-31.0422	Arid3a	0	0	1	6986	NM_007880	+	FALSE	0	0	54.1667	2
chr10.79397161.79397280	chr10	79397161	79397280	*	0	0	-33.3789	Arid3a	0	0	1	7346	NM_007880	+	FALSE	0	0	254.667	5
chr10.79479841.79479960	chr10	79479841	79479960	*	0	0	28.7512	Hmha1	1	0	1	426	NM_001142701	+	TRUE	0	0	95.6667	5
chr10.79511281.79511400	chr10	79511281	79511400	*	0	0	-33.2704	NA	0	0	0	-4855	NM_008162	+	FALSE	0	0	56	3
chr10.79511401.79511520	chr10	79511401	79511520	*	0	0	-49.4156	NA	0	0	0	-4735	NM_008162	+	FALSE	0	0	26.6667	1
chr10.79733761.79733880	chr10	79733761	79733880	*	5.72953e-12	4.7653e-11	-46.2621	Dazap1	0	0	1	6027	NM_133188	+	FALSE	0	0	19.1667	1
chr10.79743961.79744080	chr10	79743961	79744080	*	1.23235e-14	1.53139e-13	-34.3818	Dazap1	0	0	1	-11096	NM_009091	+	FALSE	0	0	49	2
chr10.79881121.79881240	chr10	79881121	79881240	*	0	0	-29.9756	Tcf3	0	0	1	-11556	NM_025650	-	FALSE	0	0	116.667	2
chr10.79973281.79973400	chr10	79973281	79973400	*	3.77476e-15	5.03893e-14	30.4242	Onecut3	0	0	1	15632	NM_139226	+	FALSE	0	0	49.6667	2
chr10.80158681.80158800	chr10	80158681	80158800	*	1.25344e-12	1.15828e-11	31.9063	Mobkl2a	0	0	1	5766	NM_172457	-	FALSE	0	0	42.5	2
chr10.80229001.80229120	chr10	80229001	80229120	*	0	0	-33.7035	Dot1l	0	0	1	11052	NM_199322	+	FALSE	0	0	81.5	3
chr10.80272801.80272920	chr10	80272801	80272920	*	2.91989e-14	3.43682e-13	-34.5539	Jsrp1	0	0	1	3324	NM_028001	-	FALSE	0	0	47.3333	2
chr10.80291041.80291160	chr10	80291041	80291160	*	0	0	-26.2647	Oaz1	1	1	1	-382	NR_035503	+	TRUE	0	1	107.5	4
chr10.80602081.80602200	chr10	80602081	80602200	*	0	0	-30.2899	Zbtb7a	0	0	1	3067	NM_010731	+	FALSE	0	1	120.667	3
chr10.80827441.80827560	chr10	80827441	80827560	*	0	0	-28.8105	4930404N11Rik	0	1	1	1006	NM_001014836	-	FALSE	1	0	229.667	13
chr10.80871241.80871360	chr10	80871241	80871360	*	0	0	-43.4777	Nfic	0	0	1	15434	NM_001099917	+	FALSE	0	0	32.5	4
chr10.80874121.80874240	chr10	80874121	80874240	*	0	0	-35.5341	Nfic	0	0	1	15679	NM_026756	-	FALSE	0	0	131.5	4
chr10.80874241.80874360	chr10	80874241	80874360	*	0	0	-26.2327	Nfic	0	0	1	15559	NM_026756	-	FALSE	0	0	94	2
chr10.80874361.80874480	chr10	80874361	80874480	*	1.50111e-10	9.86188e-10	-27.5905	Nfic	0	0	1	15439	NM_026756	-	FALSE	0	0	52.1667	2
chr10.80874481.80874600	chr10	80874481	80874600	*	0	0	-37.9093	Nfic	0	0	1	15319	NM_026756	-	FALSE	0	0	107.667	5
chr10.80874721.80874840	chr10	80874721	80874840	*	4.58766e-12	3.87061e-11	-26.4715	Nfic	0	0	1	15079	NM_026756	-	FALSE	0	0	56.1667	2
chr10.80875201.80875320	chr10	80875201	80875320	*	0	0	-32.4815	Nfic	0	0	1	14599	NM_026756	-	FALSE	0	0	105.167	3
chr10.80888161.80888280	chr10	80888161	80888280	*	0	0	-34.1376	Nfic	0	0	1	1639	NM_026756	-	FALSE	0	0	110	5
chr10.80961601.80961720	chr10	80961601	80961720	*	0	0	31.3399	S1pr4	0	1	0	1163	NM_010102	-	FALSE	0	1	209	7
chr10.81035881.81036000	chr10	81035881	81036000	*	1.11022e-15	1.5929e-14	-30.9744	NA	0	0	0	-2032	NM_001252401	+	FALSE	0	1	62.5	4
chr10.82453441.82453560	chr10	82453441	82453560	*	2.22045e-16	3.47375e-15	-35.6513	Chst11	0	0	1	5201	NM_021439	+	FALSE	0	0	44.1667	1
chr10.83904601.83904720	chr10	83904601	83904720	*	0	0	-26.1252	NA	0	0	0	-1386	NM_001004363	-	FALSE	0	1	161.5	2
chr10.83995201.83995320	chr10	83995201	83995320	*	0	0	-27.3174	Ckap4	0	0	1	1314	NM_175451	-	FALSE	0	1	164.667	5
chr10.84164041.84164160	chr10	84164041	84164160	*	0	0	-27.5113	Polr3b	0	0	1	-54633	NM_001024918	+	FALSE	0	0	131.5	4
chr10.84283201.84283320	chr10	84283201	84283320	*	1.41099e-08	6.52023e-08	29.7619	Rfx4	0	0	1	-17573	NM_027689	+	FALSE	0	0	31.6667	1
chr10.84372241.84372360	chr10	84372241	84372360	*	0	0	-49.5214	NA	0	0	0	-7998	NM_183172	+	FALSE	0	0	68.5	2
chr10.84967921.84968040	chr10	84967921	84968040	*	7.72005e-12	6.28993e-11	-36.0544	Btbd11	0	0	1	-93116	NM_001017525	+	FALSE	0	0	34	1
chr10.85002601.85002720	chr10	85002601	85002720	*	2.72544e-11	2.03494e-10	-27.9213	Btbd11	0	0	1	-58436	NM_001017525	+	FALSE	0	0	51.1667	1
chr10.8515441.8515560	chr10	8515441	8515560	*	3.21665e-12	2.77932e-11	-26.4672	Sash1	0	0	1	90309	NM_175155	-	FALSE	0	0	60.6667	1
chr10.8551561.8551680	chr10	8551561	8551680	*	0	0	-44.7931	Sash1	0	0	1	54189	NM_175155	-	FALSE	0	0	34.5	3
chr10.8671201.8671320	chr10	8671201	8671320	*	0	0	-40.929	NA	0	0	0	-65334	NM_175155	-	FALSE	0	0	57.1667	2
chr10.87009121.87009240	chr10	87009121	87009240	*	0	0	-27.5256	Pah	0	0	1	24583	NM_008777	+	FALSE	0	0	169.167	5
chr10.87258241.87258360	chr10	87258241	87258360	*	3.93463e-13	3.92896e-12	-27.1072	NA	0	0	0	-63441	NM_010512	+	FALSE	0	0	68.6667	1
chr10.88984921.88985040	chr10	88984921	88985040	*	1.11022e-16	1.78722e-15	31.0529	Nr1h4	0	0	1	11328	NM_001163504	-	FALSE	0	0	55.1667	1
chr10.89158201.89158320	chr10	89158201	89158320	*	0	0	28.3037	1500026H17Rik	0	0	0	-9172	NM_198021	-	FALSE	0	0	119.333	5
chr10.90326401.90326520	chr10	90326401	90326520	*	1.23679e-13	1.33268e-12	-32.1664	Anks1b	0	0	1	218969	NM_009684	-	FALSE	0	0	41	1
chr10.90640321.90640440	chr10	90640321	90640440	*	2.80742e-12	2.45139e-11	28.1821	NA	0	0	0	-5995	NM_001080130	-	FALSE	0	0	61.1667	2
chr10.92606641.92606760	chr10	92606641	92606760	*	0	0	27.8906	NA	0	0	0	-16861	NM_146239	+	FALSE	0	0	117.333	2
chr10.92754241.92754360	chr10	92754241	92754360	*	0	0	-31.215	Elk3	0	0	1	19545	NM_013508	-	FALSE	0	0	80	3
chr10.92901121.92901240	chr10	92901121	92901240	*	2.22045e-16	3.47375e-15	27.2368	NA	0	0	0	-14901	NM_008517	+	FALSE	0	0	83.3333	3
chr10.93381601.93381720	chr10	93381601	93381720	*	1.11022e-16	1.78722e-15	-46.4888	NA	0	0	0	-27655	NM_019648	-	FALSE	0	0	28.6667	2
chr10.94291321.94291440	chr10	94291321	94291440	*	0	0	32.3019	Plxnc1	0	0	1	115773	NM_018797	-	FALSE	0	0	200.5	4
chr10.94579561.94579680	chr10	94579561	94579680	*	0	0	-30.6252	NA	0	0	0	-172350	NM_018797	-	FALSE	0	0	104	3
chr10.94618801.94618920	chr10	94618801	94618920	*	0	0	-25.2368	NA	0	0	0	167812	NM_009950	-	FALSE	0	0	115	5
chr10.94654681.94654800	chr10	94654681	94654800	*	0	0	-29.1114	Cradd	0	0	1	131932	NM_009950	-	FALSE	0	0	79.1667	1
chr10.9474841.9474960	chr10	9474841	9474960	*	0	0	-32.4641	NA	0	0	0	70323	NR_038036	+	FALSE	0	0	80.6667	1
chr10.94784401.94784520	chr10	94784401	94784520	*	1.9118e-13	1.99972e-12	-31.4657	Cradd	0	0	1	2212	NM_009950	-	FALSE	0	1	32.8333	1
chr10.95030881.95031000	chr10	95030881	95031000	*	1.86517e-14	2.26052e-13	-29.5698	NA	0	0	0	-4081	NM_027722	-	FALSE	0	0	55.1667	1
chr10.95067721.95067840	chr10	95067721	95067840	*	0	0	30.5807	NA	0	0	0	-40921	NM_027722	-	FALSE	0	0	128.5	4
chr10.95140561.95140680	chr10	95140561	95140680	*	2.76669e-11	2.06303e-10	25.6987	NA	0	0	0	-113761	NM_027722	-	FALSE	0	0	69	5
chr10.95650801.95650920	chr10	95650801	95650920	*	0	0	-29.4842	NA	0	0	0	247506	NM_001001932	+	FALSE	0	0	218.333	1
chr10.95943961.95944080	chr10	95943961	95944080	*	0	0	37.8748	NA	0	0	0	-135555	NM_007569	+	FALSE	0	0	97.8333	3
chr10.98589721.98589840	chr10	98589721	98589840	*	0	0	36.6493	Wdr51b	0	0	1	18954	NM_015737	+	FALSE	0	0	207	7
chr10.98660761.98660880	chr10	98660761	98660880	*	1.11022e-16	1.78722e-15	27.4462	NA	0	0	0	-64985	NM_026268	+	FALSE	0	0	89.8333	3
chr10.98671921.98672040	chr10	98671921	98672040	*	0	0	-30.3371	NA	0	0	0	-53825	NM_026268	+	FALSE	0	0	82	3
chr10.98695681.98695800	chr10	98695681	98695800	*	2.33358e-07	8.48766e-07	-28.0564	NA	0	0	0	-30065	NM_026268	+	FALSE	0	0	26.3333	1
chr10.98756041.98756160	chr10	98756041	98756160	*	0	0	-25.2991	NA	0	0	0	30178	NM_026268	+	FALSE	0	0	115.333	1
chr10.98847601.98847720	chr10	98847601	98847720	*	7.10543e-15	9.12526e-14	-32.3944	NA	0	0	0	121738	NM_026268	+	FALSE	0	0	37.8333	1
chr10.99039721.99039840	chr10	99039721	99039840	*	9.53614e-08	3.75501e-07	-25.5295	Gm8671	0	0	0	-31965	NR_038019	+	FALSE	0	0	38.3333	1
chr1.100206601.100206720	chr1	100206601	100206720	*	1.64408e-08	7.50176e-08	-27.9449	NA	0	0	0	-110981	NM_001164233	+	FALSE	0	0	36.6667	1
chr1.10030441.10030560	chr1	10030441	10030560	*	0	0	-33.958	Cspp1	0	0	1	2144	NM_026493	+	TRUE	0	1	72.3333	1
chr1.107787961.107788080	chr1	107787961	107788080	*	0	0	-28.242	NA	0	0	0	-98903	NM_001122675	+	FALSE	0	0	78.5	1
chr1.107805001.107805120	chr1	107805001	107805120	*	4.77396e-15	6.28237e-14	-32.8449	NA	0	0	0	-81863	NM_001122675	+	FALSE	0	0	53.3333	1
chr1.108410761.108410880	chr1	108410761	108410880	*	0	0	-28.1803	NA	0	0	0	199988	NM_009741	-	FALSE	0	0	89.6667	2
chr1.108509521.108509640	chr1	108509521	108509640	*	0	0	31.1368	Bcl2	0	0	1	101228	NM_009741	-	FALSE	0	0	187.333	4
chr11.100183561.100183680	chr11	100183561	100183680	*	1.01854e-10	6.88773e-10	-27.7059	NA	0	0	0	2253	NM_011508	+	FALSE	0	1	42.1667	1
chr11.100195441.100195560	chr11	100195441	100195560	*	0	0	-28.5088	NA	1	0	0	-166	NM_010257	+	TRUE	0	0	94.5	1
chr11.100234201.100234320	chr11	100234201	100234320	*	0	0	-39.6023	Jup	0	0	1	-16747	NM_010404	-	FALSE	0	0	74.8333	2
chr11.100249801.100249920	chr11	100249801	100249920	*	6.79456e-14	7.60341e-13	-28.232	Jup	0	0	1	9185	NM_010593	-	FALSE	0	0	67.5	2
chr11.100252321.100252440	chr11	100252321	100252440	*	0	0	-54.4751	Jup	0	0	1	6665	NM_010593	-	FALSE	0	0	129.333	3
chr11.100252801.100252920	chr11	100252801	100252920	*	0	0	-32.3025	Jup	0	0	1	6185	NM_010593	-	FALSE	0	0	63.5	2
chr11.100257121.100257240	chr11	100257121	100257240	*	0	0	-25.827	Jup	0	0	1	1865	NM_010593	-	FALSE	0	1	104.667	4
chr11.100386241.100386360	chr11	100386241	100386360	*	1.5552e-12	1.41614e-11	-25.6613	Acly	0	0	1	2955	NM_001199296	-	FALSE	0	0	68	2
chr11.100474681.100474800	chr11	100474681	100474800	*	2.12399e-11	1.61452e-10	-28.2361	Dnajc7	0	0	1	6683	NM_019795	-	FALSE	0	0	52.6667	1
chr11.100563721.100563840	chr11	100563721	100563840	*	0	0	-28.6448	Dhx58	0	0	1	1746	NM_030150	-	FALSE	0	0	158.833	4
chr11.100678201.100678320	chr11	100678201	100678320	*	3.94326e-08	1.6721e-07	-25.9409	Stat5b	0	0	1	5565	NM_011489	-	FALSE	0	0	44	1
chr11.100683241.100683360	chr11	100683241	100683360	*	0	0	28.9711	Stat5b	1	0	1	525	NM_011489	-	TRUE	0	0	157.833	3
chr11.100731841.100731960	chr11	100731841	100731960	*	0	0	-25.2489	Stat5a	0	0	1	10045	NM_001164062	+	FALSE	0	0	338.333	3
chr11.100753081.100753200	chr11	100753081	100753200	*	1.93179e-13	2.01877e-12	31.9589	Stat3	0	0	1	31285	NM_001164062	+	FALSE	0	0	46.6667	2
chr11.100753201.100753320	chr11	100753201	100753320	*	0	0	28.7365	Stat3	0	0	1	31405	NM_001164062	+	FALSE	0	0	95.8333	4
chr11.100995841.100995960	chr11	100995841	100995960	*	1.65065e-06	5.01789e-06	-27.5758	NA	0	0	0	14398	NM_134024	+	FALSE	0	0	30	1
chr11.101120761.101120880	chr11	101120761	101120880	*	3.45723e-13	3.4791e-12	-28.692	Vps25	1	1	0	-1001	NM_175638	+	FALSE	0	1	62	3
chr11.101184961.101185080	chr11	101184961	101185080	*	3.52274e-13	3.5404e-12	-29.8015	NA	0	0	0	-1297	NM_178932	+	FALSE	0	0	56.8333	1
chr11.101518921.101519040	chr11	101518921	101519040	*	4.13447e-13	4.11495e-12	-33.7075	NA	0	0	0	-7815	NM_025404	+	FALSE	0	1	28.6667	1
chr11.101528521.101528640	chr11	101528521	101528640	*	4.55191e-15	6.00602e-14	-30.1896	Arl4d	0	1	0	1668	NM_025404	+	FALSE	0	1	62	5
chr11.102119521.102119640	chr11	102119521	102119640	*	6.61693e-14	7.41989e-13	-30.9604	BC030867	0	0	1	9327	NM_153544	+	FALSE	0	0	32.5	1
chr11.102256561.102256680	chr11	102256561	102256680	*	2.22045e-16	3.47375e-15	-33.3535	Rundc3a	0	0	1	1846	NM_001252347	+	FALSE	0	1	40.3333	1
chr11.102441241.102441360	chr11	102441241	102441360	*	0	0	-28.1812	NA	1	0	0	-809	NR_040286	-	FALSE	0	0	113.667	3
chr11.102441361.102441480	chr11	102441361	102441480	*	1.38134e-12	1.26791e-11	-31.8139	NA	1	0	0	-929	NR_040286	-	FALSE	0	0	46	2
chr11.102864601.102864720	chr11	102864601	102864720	*	1.21014e-14	1.50529e-13	-34.0611	Dcakd	0	0	1	13742	NM_026551	-	FALSE	0	0	51.5	3
chr11.102929041.102929160	chr11	102929041	102929160	*	2.55351e-15	3.48964e-14	-27.324	NA	0	0	0	33813	NM_152813	-	FALSE	0	0	80.6667	1
chr11.103034881.103035000	chr11	103034881	103035000	*	5.10703e-14	5.81972e-13	28.9396	Fmnl1	0	0	1	2431	NM_001077698	+	FALSE	0	0	61.6667	2
chr11.103037401.103037520	chr11	103037401	103037520	*	6.79343e-11	4.73807e-10	28.1028	Fmnl1	0	0	1	4951	NM_001077698	+	FALSE	0	0	39.5	2
chr11.103060681.103060800	chr11	103060681	103060800	*	0	0	-32.4708	1700023F06Rik	0	1	1	9063	NM_001254724	-	FALSE	1	1	156.333	10
chr11.103205521.103205640	chr11	103205521	103205640	*	0	0	41.9979	Arhgap27	1	0	1	377	NM_133715	-	TRUE	0	0	61.6667	2
chr11.103279441.103279560	chr11	103279441	103279560	*	0	0	-28.8561	NA	0	0	0	-5464	NM_183034	-	FALSE	0	0	72.1667	2
chr11.103701841.103701960	chr11	103701841	103701960	*	0	0	-26.532	Nsf	0	0	1	66354	NM_009521	+	FALSE	0	0	97.1667	2
chr11.103822561.103822680	chr11	103822561	103822680	*	7.94587e-13	7.57331e-12	-30.0989	NA	0	0	0	-5505	NM_007477	+	FALSE	0	0	53.8333	2
chr11.103822681.103822800	chr11	103822681	103822800	*	0	0	-30.9749	NA	0	0	0	-5385	NM_007477	+	FALSE	0	0	294.833	5
chr11.103851721.103851840	chr11	103851721	103851840	*	0	0	-25.872	NA	0	0	0	23538	NM_007477	+	FALSE	0	0	104.167	3
chr11.104164081.104164200	chr11	104164081	104164200	*	4.44089e-16	6.71236e-15	-32.1326	Mapt	0	0	1	71333	NM_001038609	+	FALSE	0	0	57.6667	3
chr11.105225001.105225120	chr11	105225001	105225120	*	0	0	-26.6673	2014-03-10	0	0	1	71043	NM_008626	+	FALSE	0	1	139	4
chr11.105926641.105926760	chr11	105926641	105926760	*	3.83291e-09	1.96429e-08	-27.8049	NA	1	0	0	-661	NM_027346	+	TRUE	0	1	40	2
chr11.105967681.105967800	chr11	105967681	105967800	*	0	0	40.175	Map3k3	0	0	1	21467	NM_011947	+	FALSE	0	0	41.6667	2
chr11.105996841.105996960	chr11	105996841	105996960	*	2.0095e-14	2.42256e-13	-41.2553	Map3k3	0	0	1	24497	NM_172397	-	FALSE	0	0	30.6667	1
chr11.106189201.106189320	chr11	106189201	106189320	*	6.04494e-11	4.25077e-10	-30.8305	Scn4a	0	0	1	-13359	NM_008339	-	FALSE	0	0	35.5	1
chr11.106343041.106343160	chr11	106343041	106343160	*	0	0	26.3445	Ern1	0	0	1	5951	NM_023913	-	FALSE	0	0	212.833	2
chr11.106343281.106343400	chr11	106343281	106343400	*	0	0	35.1792	Ern1	0	0	1	5711	NM_023913	-	FALSE	0	0	48	1
chr11.106441801.106441920	chr11	106441801	106441920	*	0	0	-34.0767	Tex2	0	0	1	32325	NM_198292	-	FALSE	0	0	82	1
chr11.106459801.106459920	chr11	106459801	106459920	*	0	0	27.346	Tex2	0	0	1	14325	NM_198292	-	FALSE	0	0	91.5	3
chr11.107227801.107227920	chr11	107227801	107227920	*	0	0	-27.3349	Pitpnc1	0	0	1	104115	NM_145823	-	FALSE	0	0	218.833	2
chr11.107239921.107240040	chr11	107239921	107240040	*	0	0	-36.7403	Pitpnc1	0	0	1	91995	NM_145823	-	FALSE	0	0	55.1667	6
chr11.107269081.107269200	chr11	107269081	107269200	*	9.65894e-15	1.21921e-13	32.3718	Pitpnc1	0	0	1	62835	NM_145823	-	FALSE	0	0	51.6667	2
chr11.107270041.107270160	chr11	107270041	107270160	*	3.8447e-13	3.84493e-12	-25.0609	Pitpnc1	0	0	1	61875	NM_145823	-	FALSE	0	0	56.8333	4
chr11.107564641.107564760	chr11	107564641	107564760	*	1.11022e-16	1.78722e-15	-26.4654	Cacng1	0	1	0	13031	NM_007582	-	FALSE	0	0	76.8333	6
chr11.109205641.109205760	chr11	109205641	109205760	*	0	0	-31.0289	NA	0	0	0	-2421	NR_027883	+	FALSE	0	0	112.833	2
chr11.109237681.109237800	chr11	109237681	109237800	*	4.32987e-15	5.73295e-14	-25.9845	Gna13	0	0	1	-12714	NR_038097	-	FALSE	0	0	70.8333	3
chr11.112820881.112821000	chr11	112820881	112821000	*	0	0	36.5456	NA	0	0	0	177359	NM_011448	+	FALSE	0	0	72	1
chr11.112957441.112957560	chr11	112957441	112957560	*	1.11022e-16	1.78722e-15	-28.6829	2610035D17Rik	0	0	1	105593	NR_015556	-	FALSE	0	0	82	3
chr11.113611441.113611560	chr11	113611441	113611560	*	4.39315e-13	4.35647e-12	-32.4711	Cdc42ep4	1	0	1	915	NM_020006	-	TRUE	0	1	39.6667	2
chr11.113646361.113646480	chr11	113646361	113646480	*	7.77156e-16	1.13822e-14	-28.736	Sdk2	0	0	1	-33233	NM_001163346	-	FALSE	0	0	64.8333	1
chr11.113663761.113663880	chr11	113663761	113663880	*	3.33067e-16	5.10257e-15	29.9839	Sdk2	0	0	1	-50633	NM_001163346	-	FALSE	0	0	71.5	3
chr11.113667241.113667360	chr11	113667241	113667360	*	3.88578e-15	5.17731e-14	34.553	Sdk2	0	0	1	-54113	NM_001163346	-	FALSE	0	0	48	1
chr11.113667361.113667480	chr11	113667361	113667480	*	0	0	27.4437	Sdk2	0	0	1	-54233	NM_001163346	-	FALSE	0	0	124.833	2
chr11.113696761.113696880	chr11	113696761	113696880	*	4.70382e-10	2.83871e-09	-32.6128	Sdk2	0	0	1	-83633	NM_001163346	-	FALSE	0	0	38.1667	1
chr11.113852041.113852160	chr11	113852041	113852160	*	5.55112e-16	8.28013e-15	-33.4832	Sdk2	0	0	1	75106	NM_172800	-	FALSE	0	0	29.1667	1
chr11.11422081.11422200	chr11	11422081	11422200	*	0	0	25.8794	NA	0	0	0	32814	NM_028669	+	FALSE	0	0	98.3333	2
chr11.11428681.11428800	chr11	11428681	11428800	*	0	0	30.3283	NA	0	0	0	39414	NM_028669	+	FALSE	0	0	286	3
chr11.11429281.11429400	chr11	11429281	11429400	*	0	0	28.4856	NA	0	0	0	40014	NM_028669	+	FALSE	0	0	93.5	4
chr11.114422521.114422640	chr11	114422521	114422640	*	1.22125e-15	1.7405e-14	-33.7458	NA	0	0	0	-107217	NM_023372	+	FALSE	0	0	54.8333	5
chr11.11459641.11459760	chr11	11459641	11459760	*	0	0	-29.197	NA	0	0	0	70374	NM_028669	+	FALSE	0	0	65.6667	3
chr11.11470681.11470800	chr11	11470681	11470800	*	0	0	32.5486	NA	0	0	0	81414	NM_028669	+	FALSE	0	0	51.8333	1
chr11.115227481.115227600	chr11	115227481	115227600	*	0	0	26.4943	C630004H02Rik	0	0	1	1434	NM_175454	-	FALSE	0	1	214.167	2
chr11.115289521.115289640	chr11	115289521	115289640	*	3.01643e-09	1.57517e-08	-26.1381	Kctd2	0	0	1	8083	NM_183285	+	FALSE	0	0	50.8333	1
chr11.115461481.115461600	chr11	115461481	115461600	*	3.41949e-14	3.98528e-13	-29.1991	Gga3	0	0	1	3631	NM_001252067	-	FALSE	0	0	63.5	1
chr11.115637281.115637400	chr11	115637281	115637400	*	6.77236e-15	8.7195e-14	-30.0105	2310067B10Rik	0	0	1	10536	NM_028014	+	FALSE	0	0	62.5	2
chr11.115637401.115637520	chr11	115637401	115637520	*	9.51671e-10	5.44065e-09	-27.5711	2310067B10Rik	0	0	1	10656	NM_028014	+	FALSE	0	0	47	2
chr11.115637641.115637760	chr11	115637641	115637760	*	1.0496e-12	9.81631e-12	-28.6564	2310067B10Rik	0	0	1	10896	NM_028014	+	FALSE	0	0	53	2
chr11.115703281.115703400	chr11	115703281	115703400	*	8.29562e-08	3.30591e-07	-25.1315	Llgl2	0	0	1	17911	NM_001252532	+	FALSE	0	0	38.8333	2
chr11.11588881.11589000	chr11	11588881	11589000	*	0	0	28.7146	Ikzf1	0	0	1	2667	NM_001025597	+	FALSE	0	0	131.667	1
chr11.115938241.115938360	chr11	115938241	115938360	*	5.75739e-12	4.78665e-11	29.372	Unc13d	1	0	1	916	NM_001009573	-	TRUE	0	0	55.8333	1
chr11.115957081.115957200	chr11	115957081	115957200	*	3.13187e-10	1.95049e-09	-25.7701	NA	0	0	0	-8804	NM_016852	-	FALSE	0	0	55.3333	1
chr11.116508481.116508600	chr11	116508481	116508600	*	0	0	-25.563	Cygb	0	0	1	7028	NM_030206	-	FALSE	0	0	168.833	6
chr11.116513761.116513880	chr11	116513761	116513880	*	0	0	-32.8791	Cygb	0	0	1	1748	NM_030206	-	TRUE	0	1	267.333	5
chr11.116675401.116675520	chr11	116675401	116675520	*	7.51177e-13	7.18417e-12	37.4428	Mxra7	0	0	1	13841	NM_026280	-	FALSE	0	0	31.3333	2
chr11.116688241.116688360	chr11	116688241	116688360	*	2.22045e-16	3.47375e-15	-25.7253	Mxra7	1	0	1	1001	NM_026280	-	FALSE	0	1	93.1667	2
chr11.116701921.116702040	chr11	116701921	116702040	*	0	0	-30.1722	Jmjd6	0	0	1	2724	NM_033398	-	FALSE	0	1	162.5	3
chr11.116725801.116725920	chr11	116725801	116725920	*	0	0	-27.2519	Mfsd11	0	0	1	10474	NM_178620	+	FALSE	0	0	71	3
chr11.116942521.116942640	chr11	116942521	116942640	*	1.79856e-13	1.88779e-12	-33.8483	NA	0	0	0	4426	NR_027059	+	FALSE	0	0	40.6667	1
chr11.116944801.116944920	chr11	116944801	116944920	*	1.38445e-13	1.47861e-12	-26.3753	NA	0	0	0	6706	NR_027059	+	FALSE	0	0	77.3333	2
chr11.116964841.116964960	chr11	116964841	116964960	*	0	0	-31.8383	NA	0	0	0	-11526	NM_001166506	+	FALSE	0	0	76.3333	3
chr11.116978041.116978160	chr11	116978041	116978160	*	0	0	-29.5058	Sec14l1	0	0	1	1557	NM_028777	+	FALSE	0	1	230	2
chr11.116978761.116978880	chr11	116978761	116978880	*	0	0	-30.7606	Sec14l1	0	0	1	2277	NM_028777	+	FALSE	0	1	246.167	7
chr11.116978881.116979000	chr11	116978881	116979000	*	5.38458e-14	6.1165e-13	-26.2028	Sec14l1	0	0	1	2397	NM_028777	+	FALSE	0	1	82.5	3
chr11.116996881.116997000	chr11	116996881	116997000	*	0	0	-28.4744	Sec14l1	0	0	1	20397	NM_028777	+	FALSE	0	0	227	7
chr11.116997121.116997240	chr11	116997121	116997240	*	0	0	-33.4074	Sec14l1	0	0	1	20637	NM_028777	+	FALSE	0	0	66	2
chr11.117154081.117154200	chr11	117154081	117154200	*	2.77556e-15	3.7767e-14	30.378	2014-09-09	0	0	1	26523	NM_001113487	+	FALSE	0	0	64	3
chr11.117186601.117186720	chr11	117186601	117186720	*	5.32793e-08	2.20446e-07	27.8846	2014-09-09	0	0	1	-6309	NM_017380	+	FALSE	0	0	33.3333	3
chr11.117195961.117196080	chr11	117195961	117196080	*	0	0	28.4841	2014-09-09	0	0	1	2336	NM_001113488	+	FALSE	0	1	138.167	2
chr11.117655681.117655800	chr11	117655681	117655800	*	6.19826e-12	5.12506e-11	27.6525	NA	0	0	0	-3174	NM_029964	+	FALSE	0	0	46.5	1
chr11.117750361.117750480	chr11	117750361	117750480	*	4.44089e-16	6.71236e-15	-28.5517	NA	0	0	0	-15522	NM_027919	-	FALSE	0	0	75.3333	5
chr11.117750601.117750720	chr11	117750601	117750720	*	0	0	-40.2353	NA	0	0	0	-15762	NM_027919	-	FALSE	0	0	75.6667	7
chr11.11779441.11779560	chr11	11779441	11779560	*	4.5436e-08	1.90477e-07	-27.1941	c("Ddc", "1700042O10Rik")	0	0	1	10852	NM_016672	-	FALSE	0	0	37.3333	1
chr11.117823801.117823920	chr11	117823801	117823920	*	1.88216e-12	1.69268e-11	-34.3619	NA	0	0	0	6761	NM_007707	-	FALSE	0	1	41.3333	1
chr11.117896521.117896640	chr11	117896521	117896640	*	1.80697e-11	1.3896e-10	-28.3467	Dnahc17	0	0	1	48352	NM_133757	+	FALSE	0	0	48.1667	4
chr11.117962641.117962760	chr11	117962641	117962760	*	2.42939e-10	1.54102e-09	-34.1526	Dnahc17	0	1	1	27774	NM_001167746	-	FALSE	0	0	26.6667	2
chr11.118217161.118217280	chr11	118217161	118217280	*	0	0	-41.1147	NA	1	0	0	-437	NM_011594	-	TRUE	0	1	50.1667	2
chr11.118330921.118331040	chr11	118330921	118331040	*	5.74417e-10	3.41481e-09	37.037	NA	0	0	0	-7234	NM_172573	+	FALSE	0	0	24	1
chr11.118413481.118413600	chr11	118413481	118413600	*	0	0	-38.6426	D11Bwg0517e	0	0	1	75209	NM_172573	+	FALSE	0	0	80.3333	3
chr11.118414561.118414680	chr11	118414561	118414680	*	0	0	-34.347	D11Bwg0517e	0	0	1	76289	NM_172573	+	FALSE	0	0	124	4
chr11.11842561.11842680	chr11	11842561	11842680	*	1.0103e-14	1.27191e-13	-26.4175	Grb10	0	0	1	-44415	NM_001190448	-	FALSE	0	0	85.1667	1
chr11.118994881.118995000	chr11	118994881	118995000	*	1.99633e-07	7.3634e-07	25.7646	NA	0	0	0	-47331	NM_007625	-	FALSE	0	0	30.5	1
chr11.119081641.119081760	chr11	119081641	119081760	*	0	0	-31.4552	Tbc1d16	0	0	1	8054	NM_172443	-	FALSE	0	0	47.3333	4
chr11.119532481.119532600	chr11	119532481	119532600	*	0	0	26.8215	Rptor	0	1	1	68174	NM_028898	+	FALSE	0	0	135	3
chr11.119774401.119774520	chr11	119774401	119774520	*	1.99174e-13	2.07771e-12	-31.4338	NA	1	0	0	-604	NM_001085498	+	TRUE	0	1	52.3333	2
chr11.119961361.119961480	chr11	119961361	119961480	*	7.64522e-12	6.23321e-11	35.9476	1810043H04Rik	0	0	1	1115	NM_001110242	+	FALSE	0	1	22.5	1
chr11.120045361.120045480	chr11	120045361	120045480	*	0	0	-33.4677	NA	0	0	0	5691	NR_030682	-	FALSE	0	1	41.3333	4
chr11.120046561.120046680	chr11	120046561	120046680	*	0	0	-42.6773	Gm9734	0	0	0	4491	NR_030682	-	FALSE	0	1	63.6667	3
chr11.120090001.120090120	chr11	120090001	120090120	*	0	0	-25.1183	NA	0	0	0	-4141	NM_198423	+	FALSE	0	0	114.833	1
chr11.120100921.120101040	chr11	120100921	120101040	*	0	0	-36.0987	Bahcc1	0	0	1	6662	NM_198423	+	FALSE	0	1	90.5	1
chr11.120102241.120102360	chr11	120102241	120102360	*	0	0	-31.0403	Bahcc1	0	0	1	7982	NM_198423	+	FALSE	0	0	234.833	6
chr11.120141481.120141600	chr11	120141481	120141600	*	6.66134e-16	9.83807e-15	-27.315	Bahcc1	0	1	1	47222	NM_198423	+	FALSE	0	0	78.1667	2
chr11.120240601.120240720	chr11	120240601	120240720	*	1.82643e-06	5.49896e-06	-28.3951	NA	1	0	0	-542	NM_027980	-	TRUE	0	1	27.6667	1
chr11.120400801.120400920	chr11	120400801	120400920	*	0	0	-30.4341	NA	0	0	0	8762	NM_008101	+	FALSE	0	0	91.3333	4
chr11.120400921.120401040	chr11	120400921	120401040	*	0	0	-30.1934	NA	0	0	0	8882	NM_008101	+	FALSE	0	0	90.5	2
chr11.120490801.120490920	chr11	120490801	120490920	*	0	0	41.7733	Mafg	0	1	0	3942	NM_010756	-	FALSE	0	0	127.333	9
chr11.120490921.120491040	chr11	120490921	120491040	*	0	0	28.2985	Mafg	0	1	0	3822	NM_010756	-	FALSE	0	0	117.333	7
chr11.120527041.120527160	chr11	120527041	120527160	*	0	0	-26.1171	NA	0	0	0	-4891	NM_175263	-	FALSE	0	0	106.167	1
chr11.120714001.120714120	chr11	120714001	120714120	*	4.44089e-16	6.71236e-15	-26.9638	Ccdc57	0	0	1	-28141	NM_007988	-	FALSE	0	0	79.8333	2
chr11.120920401.120920520	chr11	120920401	120920520	*	3.66374e-15	4.90029e-14	-27.3677	Sectm1b	0	0	1	4364	NM_026907	-	FALSE	0	0	71.8333	1
chr11.121062961.121063080	chr11	121062961	121063080	*	0	0	-33.2694	1110031I02Rik	0	0	1	-2667	NM_001001333	+	FALSE	0	0	70.5	3
chr11.121093441.121093560	chr11	121093441	121093560	*	0	0	-27.404	NA	0	0	0	-2819	NM_001252550	-	FALSE	0	0	130.167	1
chr11.121385761.121385880	chr11	121385761	121385880	*	6.0271e-09	2.98135e-08	34.3909	Tbcd	0	0	1	-5106	NM_178763	-	FALSE	0	0	21	1
chr11.121421041.121421160	chr11	121421041	121421160	*	0	0	39.0171	Tbcd	0	0	1	-40386	NM_178763	-	FALSE	0	0	115.5	2
chr11.121421161.121421280	chr11	121421161	121421280	*	2.94149e-08	1.2798e-07	28.2943	Tbcd	0	0	1	-40506	NM_178763	-	FALSE	0	0	37.8333	1
chr11.12432121.12432240	chr11	12432121	12432240	*	0	0	-32.5646	NA	0	0	0	-67159	NM_172496	-	FALSE	0	0	74.5	2
chr11.16908841.16908960	chr11	16908841	16908960	*	4.85541e-10	2.92231e-09	28.8869	NA	1	0	0	-121	NM_019549	-	TRUE	0	0	39	1
chr11.17035681.17035800	chr11	17035681	17035800	*	2.5183e-11	1.89113e-10	-29.3023	NA	0	0	0	-23501	NM_024459	+	FALSE	0	0	48.5	2
chr11.17566321.17566440	chr11	17566321	17566440	*	2.9077e-09	1.52257e-08	-28.3589	NA	0	0	0	287439	NM_026576	-	FALSE	0	0	41.6667	4
chr11.18907921.18908040	chr11	18907921	18908040	*	4.73555e-12	3.9868e-11	-25.4154	Meis1	0	0	1	10933	NM_001193271	-	FALSE	0	0	65	6
chr11.18908881.18909000	chr11	18908881	18909000	*	6.04702e-10	3.57912e-09	-29.215	Meis1	0	0	1	9973	NM_001193271	-	FALSE	0	0	39.5	1
chr1.120722401.120722520	chr1	120722401	120722520	*	0	0	-27.2147	NA	0	0	0	197881	NM_023755	+	FALSE	0	0	163	5
chr1.121191841.121191960	chr1	121191841	121191960	*	0	0	-33.2371	NA	0	0	0	126866	NM_008381	-	FALSE	0	0	130.5	3
chr1.121732201.121732320	chr1	121732201	121732320	*	0	0	-38.3427	Ptpn4	0	0	1	1329	NM_019933	-	FALSE	0	1	65	1
chr1.121972921.121973040	chr1	121972921	121973040	*	1.25577e-12	1.16021e-11	-31.1296	NA	0	0	0	-2565	NM_019432	-	FALSE	0	0	52.1667	1
chr11.22662721.22662840	chr11	22662721	22662840	*	0	0	34.8291	NA	0	0	0	96896	NM_016888	-	FALSE	0	0	374.167	7
chr11.22748641.22748760	chr11	22748641	22748760	*	1.79571e-08	8.14027e-08	26.1594	B3gnt2	0	0	1	10976	NM_016888	-	FALSE	0	0	43.5	1
chr11.22757521.22757640	chr11	22757521	22757640	*	1.38437e-10	9.14738e-10	30.3458	B3gnt2	0	0	1	2096	NM_016888	-	FALSE	0	1	43.6667	2
chr11.22771441.22771560	chr11	22771441	22771560	*	0	0	45.5486	NA	0	0	0	-11106	NM_001169114	-	FALSE	0	0	37.6667	1
chr11.25057441.25057560	chr11	25057441	25057560	*	1.55431e-15	2.18655e-14	-25.7976	NA	0	0	0	-168547	NR_045853	+	FALSE	0	0	94.3333	3
chr11.26540641.26540760	chr11	26540641	26540760	*	0	0	28.9297	NA	0	0	0	-46722	NM_001252447	-	FALSE	0	0	92.6667	2
chr1.126868921.126869040	chr1	126868921	126869040	*	2.39908e-12	2.11887e-11	-26.5536	NA	0	0	0	463265	NM_001205386	-	FALSE	0	0	38.1667	7
chr11.28635001.28635120	chr11	28635001	28635120	*	0	0	-25.8578	NA	0	0	0	-11071	NR_030419	+	FALSE	0	0	141	4
chr1.129218401.129218520	chr1	129218401	129218520	*	0	0	35.7456	Mgat5	0	0	1	116840	NM_145128	+	FALSE	0	0	71.1667	3
chr1.129356041.129356160	chr1	129356041	129356160	*	1.04829e-05	2.66634e-05	-27.1104	Mgat5	0	0	1	218439	NM_028135	-	FALSE	0	0	24.5	1
chr1.129473281.129473400	chr1	129473281	129473400	*	0	0	-32.0096	Tmem163	0	0	1	101199	NM_028135	-	FALSE	0	0	104.833	2
chr11.29725081.29725200	chr11	29725081	29725200	*	0	0	29.1395	c("Eml6", "4931440F15Rik")	1	1	1	469	NM_176829	-	TRUE	1	0	86.6667	16
chr1.129801241.129801360	chr1	129801241	129801360	*	1.36047e-12	1.24995e-11	-26.2994	Rab3gap1	0	0	1	35893	NM_178690	+	FALSE	0	0	65.5	1
chr1.130756561.130756680	chr1	130756561	130756680	*	2.77268e-09	1.45764e-08	-26.1264	NA	0	0	0	-267686	NM_009911	-	FALSE	0	0	53.1667	1
chr11.31670401.31670520	chr11	31670401	31670520	*	1.44329e-15	2.03923e-14	-29.7326	NA	0	0	0	-98540	NM_001024919	-	FALSE	0	0	57.6667	1
chr11.31738681.31738800	chr11	31738681	31738800	*	2.70894e-14	3.20587e-13	-26.2215	NA	0	0	0	-33411	NM_026252	+	FALSE	0	0	81	2
chr11.32167921.32168040	chr11	32167921	32168040	*	6.72795e-14	7.53344e-13	-25.6956	NA	1	0	0	-308	NM_181569	-	TRUE	0	1	71	1
chr11.32193601.32193720	chr11	32193601	32193720	*	2.31315e-12	2.04835e-11	-25.3784	NA	0	0	0	-2769	NM_008218	+	FALSE	0	0	63.3333	2
chr1.132405121.132405240	chr1	132405121	132405240	*	0	0	-29.3374	NA	0	0	0	-45805	NM_010016	-	FALSE	0	0	78.5	1
chr1.132628561.132628680	chr1	132628561	132628680	*	3.85267e-09	1.97362e-08	-28.2669	AA986860	1	1	0	10	NM_177604	+	TRUE	0	0	39.6667	2
chr1.133085281.133085400	chr1	133085281	133085400	*	0	0	29.9474	Rassf5	0	0	1	35499	NM_010709	+	FALSE	0	0	219.5	3
chr1.133095841.133095960	chr1	133095841	133095960	*	0	0	29.0241	Rassf5	0	0	1	45796	NM_018750	-	TRUE	0	0	214.5	2
chr1.133095961.133096080	chr1	133095961	133096080	*	0	0	25.8321	Rassf5	0	0	1	45676	NM_018750	-	TRUE	0	0	568.5	4
chr1.133096561.133096680	chr1	133096561	133096680	*	0	0	37.4263	Rassf5	0	0	1	45076	NM_018750	-	TRUE	0	0	92.8333	6
chr1.133096681.133096800	chr1	133096681	133096800	*	0	0	39.9514	Rassf5	0	0	1	44956	NM_018750	-	TRUE	0	0	68.6667	4
chr1.133171681.133171800	chr1	133171681	133171800	*	0	0	-40.6276	Ikbke	0	1	1	4341	NM_019777	-	FALSE	0	0	83.3333	5
chr11.33787801.33787920	chr11	33787801	33787920	*	1.62819e-10	1.06445e-09	-28.6498	NA	0	0	1	-44217	NM_027398	-	FALSE	0	0	33.8333	1
chr1.133851241.133851360	chr1	133851241	133851360	*	3.63121e-12	3.11369e-11	33.0334	NA	0	0	0	-8132	NM_001177628	+	FALSE	0	0	39.6667	2
chr1.134229601.134229720	chr1	134229601	134229720	*	9.39316e-09	4.48414e-08	-29.8557	Nuak2	0	1	0	16901	NM_028778	+	FALSE	0	0	32.1667	1
chr1.134230441.134230560	chr1	134230441	134230560	*	3.71977e-08	1.58539e-07	-30.438	NA	0	0	0	17741	NM_028778	+	FALSE	0	0	30.8333	1
chr1.134232001.134232120	chr1	134232001	134232120	*	0	0	-38.6209	NA	0	0	0	19301	NM_028778	+	FALSE	0	0	121.667	4
chr1.134232121.134232240	chr1	134232121	134232240	*	0	0	-37.3094	NA	0	0	0	19421	NM_028778	+	FALSE	0	0	136.333	2
chr1.134232241.134232360	chr1	134232241	134232360	*	6.11733e-14	6.89097e-13	-27.2723	NA	0	0	0	19541	NM_028778	+	FALSE	0	0	75.8333	4
chr1.134278681.134278800	chr1	134278681	134278800	*	0	0	32.7121	Tmcc2	0	0	1	9059	NM_178874	-	FALSE	0	0	85.1667	5
chr11.34289401.34289520	chr11	34289401	34289520	*	2.72835e-10	1.71587e-09	27.1941	c("Dock2", "Fam196b")	0	0	1	74581	NM_001025382	+	FALSE	0	0	36.1667	1
chr1.134417161.134417280	chr1	134417161	134417280	*	0	0	-39.8284	Cntn2	0	0	1	14356	NM_029025	+	FALSE	0	0	92.6667	2
chr11.34596961.34597080	chr11	34596961	34597080	*	7.43849e-14	8.27525e-13	30.9401	Dock2	1	0	1	246	NM_033374	-	TRUE	0	0	53.8333	1
chr11.3474601.3474720	chr11	3474601	3474720	*	0	0	-28.1278	NA	0	0	0	-35307	NM_001159284	-	FALSE	0	0	256.5	3
chr11.3487441.3487560	chr11	3487441	3487560	*	8.80751e-08	3.49211e-07	-29.0531	NA	0	0	0	-48147	NM_001159284	-	FALSE	0	0	30.6667	1
chr1.134992201.134992320	chr1	134992201	134992320	*	0	0	-26.7809	Pik3c2b	0	0	1	-35423	NM_133819	+	FALSE	0	0	264.667	3
chr11.35139841.35139960	chr11	35139841	35139960	*	6.66134e-16	9.83807e-15	27.7942	Slit3	0	0	1	204885	NM_011412	+	FALSE	0	0	78.3333	1
chr1.135150361.135150480	chr1	135150361	135150480	*	0	0	-33.8735	c("Plekha6", "LOC100502933")	0	0	1	7689	NM_182930	+	FALSE	0	0	85.6667	2
chr11.35265841.35265960	chr11	35265841	35265960	*	1.05516e-12	9.8636e-12	27.6315	Slit3	0	0	1	-164358	NR_029799	+	FALSE	0	0	41.1667	2
chr1.135294601.135294720	chr1	135294601	135294720	*	0	0	-34.2448	Sox13	0	0	1	26070	NM_011439	-	FALSE	0	0	65.5	4
chr11.35452681.35452800	chr11	35452681	35452800	*	1.31879e-08	6.13089e-08	-26.3246	Slit3	0	0	1	22365	NR_029799	+	FALSE	0	0	43.1667	1
chr11.35551801.35551920	chr11	35551801	35551920	*	0	0	-28.1562	NA	0	0	0	-31077	NM_145962	+	FALSE	0	0	84.3333	1
chr1.135592921.135593040	chr1	135592921	135593040	*	2.22045e-16	3.47375e-15	-27.2892	NA	0	0	0	-6237	NM_001159649	-	FALSE	0	0	91.6667	1
chr1.135814321.135814440	chr1	135814321	135814440	*	0	0	-26.3679	Prelp	0	0	1	3539	NM_054077	-	FALSE	0	0	92.8333	3
chr1.136316761.136316880	chr1	136316761	136316880	*	4.11156e-09	2.09543e-08	-25.2253	Adipor1	0	0	1	4719	NM_028320	+	FALSE	0	0	43.8333	1
chr1.136410721.136410840	chr1	136410721	136410840	*	1.11022e-16	1.78722e-15	-27.314	LOC100503055	0	0	0	19486	NM_145510	+	FALSE	0	1	93.6667	2
chr1.136451881.136452000	chr1	136451881	136452000	*	0	0	-26.7577	NA	0	0	0	-4755	NM_152895	+	FALSE	0	1	80.6667	3
chr1.13646401.13646520	chr1	13646401	13646520	*	1.23235e-13	1.3285e-12	-32.387	Lactb2	0	0	1	4071	NM_145381	-	FALSE	0	0	48.8333	1
chr1.136547521.136547640	chr1	136547521	136547640	*	0	0	-25.3157	Syt2	0	0	1	4265	NM_009307	+	FALSE	0	0	76.8333	2
chr1.137029561.137029680	chr1	137029561	137029680	*	0	0	26.1968	Ptpn7	1	0	1	261	NM_177081	+	TRUE	0	0	115.667	2
chr1.137029681.137029800	chr1	137029681	137029800	*	1.11022e-16	1.78722e-15	35.8108	Ptpn7	1	0	1	381	NM_177081	+	TRUE	0	0	53.1667	3
chr1.137032081.137032200	chr1	137032081	137032200	*	9.09247e-10	5.21343e-09	28.7503	Ptpn7	0	0	1	2781	NM_177081	+	FALSE	0	0	44.8333	1
chr1.137033521.137033640	chr1	137033521	137033640	*	0	0	-37.1681	Ptpn7	0	0	1	4221	NM_177081	+	FALSE	0	0	51.5	2
chr1.137114041.137114160	chr1	137114041	137114160	*	0	0	-38.9283	NA	0	0	0	40890	NM_001163131	-	FALSE	0	0	44.1667	1
chr1.137460481.137460600	chr1	137460481	137460600	*	0	0	-25.5265	Nav1	0	0	1	21333	NM_173437	-	FALSE	0	0	203.333	3
chr1.137503921.137504040	chr1	137503921	137504040	*	3.33067e-16	5.10257e-15	-31.3665	NA	0	0	0	-21990	NM_173437	-	TRUE	0	0	60.3333	2
chr1.137565961.137566080	chr1	137565961	137566080	*	6.06079e-07	2.02286e-06	-27.669	NA	0	0	0	-59694	NM_007791	+	FALSE	0	0	32.3333	4
chr1.137667361.137667480	chr1	137667361	137667480	*	1.84375e-12	1.66038e-11	-33.9201	NA	0	0	0	4701	NM_013750	+	FALSE	0	0	35.1667	4
chr1.137667841.137667960	chr1	137667841	137667960	*	1.73494e-10	1.12893e-09	-28.527	NA	0	0	0	5181	NM_013750	+	FALSE	0	0	49.8333	4
chr1.138075601.138075720	chr1	138075601	138075720	*	0	0	-47.3677	NA	0	0	0	47625	NM_001039472	+	FALSE	0	0	40.8333	2
chr11.3812401.3812520	chr11	3812401	3812520	*	0	0	-31.6114	Slc35e4	0	0	1	2148	NM_153142	-	FALSE	0	1	72	1
chr1.138240241.138240360	chr1	138240241	138240360	*	0	0	-34.2833	Camsap1l1	0	0	1	2322	NM_001081360	-	FALSE	0	1	82.1667	1
chr1.138274201.138274320	chr1	138274201	138274320	*	0	0	25.798	NA	0	0	0	-31521	NM_001081360	-	FALSE	0	0	121.167	5
chr1.138291841.138291960	chr1	138291841	138291960	*	7.13299e-10	4.16645e-09	-32.815	NA	0	0	0	-19888	NM_026500	+	FALSE	0	0	34.5	2
chr1.13836961.13837080	chr1	13836961	13837080	*	9.03722e-14	9.93788e-13	-36.9987	NA	0	0	0	-59952	NR_004447	-	FALSE	0	0	33.8333	2
chr1.138452641.138452760	chr1	138452641	138452760	*	0	0	-30.9911	NA	0	0	0	-68718	NM_177643	+	FALSE	0	0	111.333	2
chr1.138476881.138477000	chr1	138476881	138477000	*	0	0	26.3503	NA	0	0	0	-44478	NM_177643	+	FALSE	0	0	151.833	3
chr1.138542521.138542640	chr1	138542521	138542640	*	0	0	-29.3527	NA	0	0	0	21045	NM_001160251	+	FALSE	0	0	81	1
chr1.138592921.138593040	chr1	138592921	138593040	*	0	0	-31.7272	LOC100503474	1	1	1	135	NR_037986	+	FALSE	0	0	254	5
chr1.138735841.138735960	chr1	138735841	138735960	*	1.11022e-16	1.78722e-15	-31.5007	NA	0	0	0	114248	NM_001159769	-	FALSE	0	0	74	3
chr11.3932041.3932160	chr11	3932041	3932160	*	0	0	-33.9917	Sec14l4	1	0	1	258	NM_146013	+	TRUE	0	0	80.6667	6
chr1.140016841.140016960	chr1	140016841	140016960	*	0	0	-32.0852	Ptprc	0	0	1	54744	NM_001111316	-	FALSE	0	0	76.3333	2
chr11.4019521.4019640	chr11	4019521	4019640	*	0	0	28.5509	NA	1	0	0	-790	NM_144520	-	TRUE	0	1	139.667	4
chr1.140503321.140503440	chr1	140503321	140503440	*	0	0	-31.0423	Nek7	0	0	1	12834	NM_021605	-	FALSE	0	0	71.8333	2
chr1.140503441.140503560	chr1	140503441	140503560	*	0	0	-35.3835	Nek7	0	0	1	12714	NM_021605	-	FALSE	0	0	129.167	2
chr11.4137241.4137360	chr11	4137241	4137360	*	0	0	41.8059	Osm	1	0	1	455	NM_001013365	+	TRUE	0	0	123.167	3
chr11.4137361.4137480	chr11	4137361	4137480	*	2.02183e-12	1.80837e-11	26.4101	Osm	1	0	1	575	NM_001013365	+	TRUE	0	0	75.1667	2
chr11.4137721.4137840	chr11	4137721	4137840	*	2.77556e-15	3.7767e-14	35.4867	Osm	1	0	1	935	NM_001013365	+	TRUE	0	0	45.3333	4
chr11.4137841.4137960	chr11	4137841	4137960	*	0	0	35.3338	Osm	0	0	1	1055	NM_001013365	+	FALSE	0	0	97.3333	5
chr11.4199881.4200000	chr11	4199881	4200000	*	0	0	-26.4834	NA	0	0	0	32785	NM_001039537	+	FALSE	0	0	332.333	6
chr1.142636081.142636200	chr1	142636081	142636200	*	4.52338e-12	3.82055e-11	-28.8952	NA	0	0	0	-83103	NR_040604	-	FALSE	0	0	54	1
chr1.14302561.14302680	chr1	14302561	14302680	*	0	0	-40.5536	NA	0	0	0	-2282	NM_001252192	-	FALSE	0	0	47.3333	1
chr11.43077361.43077480	chr11	43077361	43077480	*	0	0	-25.9886	NA	0	0	0	110484	NR_029558	-	FALSE	0	0	122.667	1
chr11.43560601.43560720	chr11	43560601	43560720	*	7.20538e-09	3.5123e-08	-25.67	Ttc1	1	0	1	756	NM_133795	-	TRUE	0	1	50.5	3
chr11.43648081.43648200	chr11	43648081	43648200	*	5.61318e-11	3.96954e-10	-33.3696	Adra1b	0	0	1	1635	NM_007416	-	FALSE	0	1	35	3
chr11.43740841.43740960	chr11	43740841	43740960	*	1.0645e-10	7.17121e-10	-26.9617	NA	0	0	0	-91008	NM_007416	-	FALSE	0	0	47.5	2
chr11.44342761.44342880	chr11	44342761	44342880	*	0	0	37.6984	Rnf145	0	0	1	9884	NM_001166553	+	FALSE	0	0	72.3333	5
chr11.45879001.45879120	chr11	45879001	45879120	*	0	0	-28.1023	Adam19	0	0	1	9514	NM_009616	+	FALSE	0	0	149.5	3
chr11.45879241.45879360	chr11	45879241	45879360	*	1.44329e-15	2.03923e-14	-35.5454	Adam19	0	0	1	9754	NM_009616	+	FALSE	0	0	47.1667	1
chr11.45883201.45883320	chr11	45883201	45883320	*	0	0	-31.3809	Adam19	0	0	1	13714	NM_009616	+	FALSE	0	0	103.5	5
chr11.45899281.45899400	chr11	45899281	45899400	*	0	0	-26.1738	Adam19	0	0	1	29794	NM_009616	+	FALSE	0	0	124.833	2
chr11.45900121.45900240	chr11	45900121	45900240	*	0	0	30.046	Adam19	0	0	1	30634	NM_009616	+	FALSE	0	0	69.1667	1
chr11.45920761.45920880	chr11	45920761	45920880	*	1.80906e-08	8.19582e-08	-30.3084	Adam19	0	0	1	51274	NM_009616	+	FALSE	0	0	26.3333	1
chr11.46031641.46031760	chr11	46031641	46031760	*	0	0	-27.2321	Cyfip2	0	0	1	-17299	NM_177075	+	FALSE	0	0	126.833	3
chr1.146096281.146096400	chr1	146096281	146096400	*	0	0	32.6027	NA	1	0	0	-48	NM_015811	-	TRUE	0	0	73.6667	3
chr11.46120201.46120320	chr11	46120201	46120320	*	0	0	28.587	Cyfip2	0	0	1	5541	NM_133769	-	FALSE	0	0	95.6667	3
chr11.46123801.46123920	chr11	46123801	46123920	*	1.75304e-13	1.84357e-12	30.7228	Cyfip2	0	0	1	1941	NM_133769	-	FALSE	0	1	52.8333	1
chr11.46123921.46124040	chr11	46123921	46124040	*	2.64233e-14	3.13091e-13	28.3088	Cyfip2	0	0	1	1821	NM_133769	-	FALSE	0	1	68	3
chr11.4621201.4621320	chr11	4621201	4621320	*	0	0	-30.2925	c("Zmat5", "LOC100503092")	0	0	1	16522	NM_026015	+	FALSE	0	0	105.5	4
chr11.46261441.46261560	chr11	46261441	46261560	*	0	0	29.875	NA	0	0	0	-6873	NM_134250	+	FALSE	0	0	94.3333	1
chr11.46261921.46262040	chr11	46261921	46262040	*	0	0	29.3532	NA	0	0	0	-6393	NM_134250	+	FALSE	0	0	124	1
chr11.47704081.47704200	chr11	47704081	47704200	*	1.05288e-06	3.33698e-06	-26.0276	NA	0	0	0	-511278	NM_011891	-	FALSE	0	0	28	1
chr11.4915801.4915920	chr11	4915801	4915920	*	3.33067e-16	5.10257e-15	-32.2969	Ap1b1	0	0	1	28976	NM_007454	+	FALSE	0	0	56.8333	1
chr11.4940401.4940520	chr11	4940401	4940520	*	3.37329e-10	2.0887e-09	-26.7172	Ap1b1	0	1	1	-17611	NM_145216	+	FALSE	0	0	32.3333	1
chr11.4968361.4968480	chr11	4968361	4968480	*	3.33067e-16	5.10257e-15	-31.1513	NA	0	0	0	-3032	NM_144560	-	FALSE	0	0	60.5	2
chr11.50044801.50044920	chr11	50044801	50044920	*	3.33067e-16	5.10257e-15	-32.5456	Mgat4b	0	1	1	5966	NM_145926	+	FALSE	1	1	59.3333	7
chr11.5040721.5040840	chr11	5040721	5040840	*	0	0	-27.364	Emid1	0	0	1	11386	NM_080595	-	FALSE	0	0	77	3
chr11.50790841.50790960	chr11	50790841	50790960	*	0	0	-42.0168	LOC100418042	0	0	0	-7245	NM_146911	+	FALSE	0	0	39.3333	1
chr11.51459841.51459960	chr11	51459841	51459960	*	0	0	-30.7704	C330016O10Rik	0	0	1	-4496	NR_027958	+	FALSE	0	0	52	2
chr11.51461161.51461280	chr11	51461161	51461280	*	0	0	-33.1592	C330016O10Rik	0	0	1	-3176	NR_027958	+	FALSE	0	0	56.8333	1
chr11.51673201.51673320	chr11	51673201	51673320	*	9.92345e-09	4.71603e-08	-29.0724	NA	0	0	0	-2219	NM_199299	-	FALSE	0	1	38	1
chr11.52093441.52093560	chr11	52093441	52093560	*	0	0	30.4735	c("Tcf7", "A630014C17Rik")	0	0	1	2193	NM_009331	-	FALSE	0	0	57.6667	1
chr11.52093561.52093680	chr11	52093561	52093680	*	0	0	29.9188	c("Tcf7", "A630014C17Rik")	0	0	1	2073	NM_009331	-	FALSE	0	0	169.167	4
chr11.52095361.52095480	chr11	52095361	52095480	*	1.33227e-15	1.88973e-14	26.1511	c("Tcf7", "A630014C17Rik")	1	0	1	273	NM_009331	-	TRUE	0	1	87.1667	4
chr11.52187881.52188000	chr11	52187881	52188000	*	7.18642e-09	3.50384e-08	-28.6871	Vdac1	0	0	1	13266	NM_011694	+	FALSE	0	0	42.3333	1
chr11.52432441.52432560	chr11	52432441	52432560	*	1.59167e-09	8.74505e-09	-28.0975	NA	0	0	0	-145648	NM_177059	+	FALSE	0	0	38.5	1
chr1.152921641.152921760	chr1	152921641	152921760	*	0	0	29.5426	NA	0	0	0	-63404	NR_038011	+	FALSE	0	0	219	2
chr11.52998481.52998600	chr11	52998481	52998600	*	0	0	35.912	Fstl4	0	0	1	-64924	NR_046047	-	FALSE	0	0	154	2
chr11.53073721.53073840	chr11	53073721	53073840	*	2.61013e-12	2.29057e-11	-26.6387	Hspa4	0	1	0	40142	NM_008300	-	FALSE	0	0	59.8333	1
chr1.153112081.153112200	chr1	153112081	153112200	*	8.08242e-14	8.94629e-13	-30.1112	NA	0	0	0	-79428	NM_054102	+	FALSE	0	0	59.3333	1
chr11.53122801.53122920	chr11	53122801	53122920	*	1.32275e-10	8.77122e-10	-29.5674	NA	0	0	0	-8821	NM_008300	-	FALSE	0	0	43	1
chr11.53156281.53156400	chr11	53156281	53156400	*	0	0	33.0018	NA	0	0	0	-7869	NM_033565	+	FALSE	0	0	63.5	1
chr11.53275561.53275680	chr11	53275561	53275680	*	1.80363e-08	8.17338e-08	-28.9608	Shroom1	0	0	1	4856	NM_027917	+	FALSE	0	1	33.5	1
chr1.153304321.153304440	chr1	153304321	153304440	*	0	0	26.1182	1190005F20Rik	0	0	1	28545	NM_026876	+	FALSE	0	0	130.667	2
chr11.53335321.53335440	chr11	53335321	53335440	*	0	0	-28.4394	2014-09-08	0	0	1	2085	NM_001252332	+	FALSE	0	1	162.667	4
chr11.53404081.53404200	chr11	53404081	53404200	*	0	0	28.1899	Kif3a	0	0	1	23202	NM_008443	+	FALSE	0	0	522.167	5
chr11.53519761.53519880	chr11	53519761	53519880	*	2.32494e-10	1.47939e-09	-27.2673	Rad50	1	0	1	942	NM_009012	-	TRUE	0	1	47	1
chr11.53610361.53610480	chr11	53610361	53610480	*	0	0	-31.3586	RP23-303F24.3	0	0	1	26388	NM_001159396	+	FALSE	0	0	99.5	2
chr11.53820481.53820600	chr11	53820481	53820600	*	1.75415e-14	2.13461e-13	-25.0975	Slc22a4	0	0	1	20993	NM_019687	-	FALSE	0	0	87.5	2
chr11.53820601.53820720	chr11	53820601	53820720	*	0	0	-38.8682	Slc22a4	0	0	1	20873	NM_019687	-	FALSE	0	0	45.6667	1
chr1.154079041.154079160	chr1	154079041	154079160	*	0	0	-26.5263	NA	0	0	0	-141592	NM_197990	-	FALSE	0	0	96.5	3
chr11.54126241.54126360	chr11	54126241	54126360	*	2.09388e-13	2.17686e-12	-27.8397	Acsl6	0	0	1	-2045	NM_001033599	+	FALSE	0	0	64.6667	1
chr1.154470121.154470240	chr1	154470121	154470240	*	0	0	-25.645	Rgl1	0	0	1	2002	NM_016846	-	FALSE	0	1	276.667	2
chr11.54525481.54525600	chr11	54525481	54525600	*	0	0	-30.676	NA	0	0	0	75606	NM_178626	-	FALSE	0	0	308	3
chr1.154645561.154645680	chr1	154645561	154645680	*	0	0	39.0163	NA	0	0	0	-9340	NM_010877	+	FALSE	0	0	48.1667	2
chr11.5466601.5466720	chr11	5466601	5466720	*	0	0	36.8476	NA	0	0	0	-2967	NM_023816	+	FALSE	0	0	59.5	1
chr11.54749881.54750000	chr11	54749881	54750000	*	0	0	32.7878	Tnip1	0	1	1	26443	NM_001199275	-	FALSE	0	0	90.3333	5
chr11.54767881.54768000	chr11	54767881	54768000	*	0	0	-27.8938	Tnip1	0	0	1	8443	NM_001199275	-	FALSE	0	1	89.6667	4
chr1.154862041.154862160	chr1	154862041	154862160	*	0	0	-31.4954	Nmnat2	0	0	1	59812	NM_175460	+	FALSE	0	0	74.1667	1
chr1.154932241.154932360	chr1	154932241	154932360	*	0	0	32.4526	Nmnat2	0	0	1	101218	NM_008485	-	FALSE	0	0	100.167	2
chr11.55763281.55763400	chr11	55763281	55763400	*	8.99809e-10	5.16377e-09	-30.7757	LOC100502790	0	0	0	91090	NM_153079	-	FALSE	0	0	38.3333	2
chr11.55806121.55806240	chr11	55806121	55806240	*	7.60503e-14	8.45187e-13	-27.9933	LOC100502790	0	0	0	48250	NM_153079	-	FALSE	0	0	62.1667	2
chr1.156921961.156922080	chr1	156921961	156922080	*	1.19328e-09	6.70723e-09	-27.1216	NA	0	0	0	24687	NM_010500	-	FALSE	0	0	48.5	1
chr1.156957241.156957360	chr1	156957241	156957360	*	0	0	-25.117	NA	0	0	0	-10476	NM_010500	-	FALSE	0	0	167.833	7
chr1.157070281.157070400	chr1	157070281	157070400	*	2.27917e-10	1.45215e-09	36.4056	BC034090	0	0	0	64450	NM_021433	+	FALSE	0	0	30	1
chr11.57280801.57280920	chr11	57280801	57280920	*	1.49281e-12	1.36353e-11	38.0461	NA	0	0	0	51227	NM_001168668	-	FALSE	0	0	32.8333	2
chr1.157376401.157376520	chr1	157376401	157376520	*	6.59342e-10	3.87626e-09	-26.8588	NA	0	0	0	-28730	NM_028250	+	FALSE	0	0	48.8333	1
chr11.57533161.57533280	chr11	57533161	57533280	*	7.92699e-14	8.78806e-13	-33.2274	Galnt10	0	0	1	74219	NM_134189	+	FALSE	0	0	45.5	2
chr1.157657081.157657200	chr1	157657081	157657200	*	2.71561e-13	2.77229e-12	-27.9102	Qsox1	0	0	1	2830	NM_023268	-	FALSE	0	0	64.5	1
chr11.57795121.57795240	chr11	57795121	57795240	*	9.86988e-14	1.07857e-12	-30.4805	NA	0	0	0	-27326	NM_028451	+	FALSE	0	0	53.3333	3
chr11.57800161.57800280	chr11	57800161	57800280	*	0	0	-29.5914	NA	0	0	0	-22286	NM_028451	+	FALSE	0	0	76.6667	2
chr11.57911281.57911400	chr11	57911281	57911400	*	0	0	28.1955	c("Gm12248", "Gm12247")	0	0	0	-6255	NM_026949	+	FALSE	1	0	101.5	8
chr1.157923601.157923720	chr1	157923601	157923720	*	3.37552e-12	2.90693e-11	30.3561	Fam163a	0	1	0	35612	NM_022329	+	FALSE	0	0	48.8333	1
chr1.158470561.158470680	chr1	158470561	158470680	*	0	0	-26.8465	NA	0	0	0	-18238	NM_001136104	+	FALSE	0	0	103.333	2
chr1.158578801.158578920	chr1	158578801	158578920	*	1.07408e-07	4.18492e-07	-26.7321	Abl2	0	1	0	25551	NM_023141	-	FALSE	0	0	32.6667	1
chr11.58761601.58761720	chr11	58761601	58761720	*	0	0	-25.8605	NA	1	0	0	-693	NM_030082	+	TRUE	0	1	99.3333	1
chr11.59272441.59272560	chr11	59272441	59272560	*	1.68876e-12	1.53036e-11	-27.4101	NA	0	0	0	8896	NM_178659	+	FALSE	0	0	56.3333	1
chr11.59272801.59272920	chr11	59272801	59272920	*	3.3987e-11	2.49345e-10	-32.2145	NA	0	0	0	9256	NM_178659	+	FALSE	0	0	41	1
chr1.159374641.159374760	chr1	159374641	159374760	*	0	0	-46.9551	NA	0	0	0	-13953	NM_001033284	+	FALSE	0	0	32.8333	3
chr1.159478081.159478200	chr1	159478081	159478200	*	0	0	25.3678	Sec16b	0	0	1	21782	NM_001159986	+	FALSE	0	0	116.5	1
chr1.159524761.159524880	chr1	159524761	159524880	*	5.44009e-15	7.10043e-14	-38.6871	NA	0	0	0	68462	NM_001159986	+	FALSE	0	0	35.6667	1
chr11.59883961.59884080	chr11	59883961	59884080	*	0	0	-28.6297	NA	0	0	0	-33621	NM_008819	-	FALSE	0	0	99.6667	1
chr11.60149401.60149520	chr11	60149401	60149520	*	0	0	-33.0737	Tom1l2	0	0	1	16888	NM_153080	-	FALSE	0	0	74.5	1
chr11.60594721.60594840	chr11	60594721	60594840	*	2.45551e-11	1.84769e-10	-32.0288	Smcr8	0	0	1	3696	NM_175491	+	FALSE	0	0	43	1
chr11.60746881.60747000	chr11	60746881	60747000	*	1.91092e-12	1.71667e-11	-25.3028	Map2k3	0	0	1	1324	NM_008928	+	FALSE	0	1	78.6667	2
chr11.60942961.60943080	chr11	60942961	60943080	*	8.69971e-13	8.24519e-12	-29.964	NA	0	0	0	-11257	NM_021349	+	FALSE	0	0	55.8333	2
chr11.60960721.60960840	chr11	60960721	60960840	*	0	0	-27.6607	Tnfrsf13b	0	0	1	6386	NM_021349	+	FALSE	1	1	161	9
chr11.61261201.61261320	chr11	61261201	61261320	*	0	0	-27.1537	NA	0	0	0	6069	NM_009548	-	FALSE	0	0	116.5	2
chr11.61672801.61672920	chr11	61672801	61672920	*	4.21996e-13	4.19585e-12	-34.506	NA	0	0	0	-4208	NM_013881	-	FALSE	0	0	41.6667	1
chr11.61841041.61841160	chr11	61841041	61841160	*	0	0	-28.9562	NA	0	0	0	-49439	NM_001029936	+	FALSE	0	0	190.333	2
chr11.61921081.61921200	chr11	61921081	61921200	*	0	0	-27.5275	Cytsb	0	0	1	30484	NM_001029936	+	FALSE	0	0	55	1
chr11.61962121.61962240	chr11	61962121	61962240	*	0	0	30.5036	Cytsb	0	0	1	71524	NM_001029936	+	FALSE	0	0	120.833	3
chr11.62054281.62054400	chr11	62054281	62054400	*	9.59372e-09	4.57159e-08	-38.8742	NA	0	0	0	-8086	NM_007413	+	FALSE	0	0	19.8333	2
chr1.16218961.16219080	chr1	16218961	16219080	*	5.57819e-10	3.32472e-09	-25.0723	Stau2	0	1	0	123000	NM_133832	+	FALSE	0	0	53.5	2
chr1.162198481.162198600	chr1	162198481	162198600	*	0	0	40.968	Rabgap1l	0	0	1	-55459	NM_009786	-	FALSE	0	0	43.8333	1
chr11.62563081.62563200	chr11	62563081	62563200	*	0	0	38.8782	Gm12282	0	0	0	-20487	NM_133208	-	FALSE	0	0	85.1667	4
[truncated: 3,794 more rows]

[truncated: 3 more sheets: IPA Persistently Hypermeth, IPA Persistently Hypometh, IPA Combined Hyper-Hypo]
