# Supplementary material for: Targeted DNA Methylation Screen in the Mouse Mammary Genome Reveals a Parity-Induced Hypermethylation of Igf1r That Persists Long after Parturition
Source: Oxford University Press journal article supplement (doi:10.1158/1940-6207.capr-15-0178), 2015-08-19
Supplement: 19406207capr150178-sup-148893_1_supp_3063686_nrn0cr.docx [file 19406207capr150178-sup-148893_1_supp_3063686_nrn0cr.docx]

*Supplemental Table S1. Primers used for quantitative PCR and bisulfite sequencing.*

| **Gene** | **Application** | **Forward** | **Reverse** |
| --- | --- | --- | --- |
| **Igf1r** | qPCR | taacatccggagaggcaataa | agaccaaggcatgagaatgg |
| **Igfbp4** | qPCR | tcatccccattccaaactgtg | gcttcacccctgtcttcc |
| **Igf1** | qPCR | tggatgctcttcagttcgtg | agtacatctccagtctcctcag |
| **Irs1** | qPCR | ctcagtcccaaccataaccag | tccaaagggcaccgtattg |
| **Prlr** | qPCR | acaaatgtcgttcccctgac | gccactggttttgtagtctgg |
| **Stat5b** | qPCR | cgatgcccttcaccagatg | tggccttaatgttctcctgtg |
| **Ck18** | qPCR | acaccaacatcacaaggctg | ttccacagtcaatccagagc |
| **Esr1** | qPCR | aaccgcccatgatctattctg | agattcaagtccccaaagcc |
| **Ck14** | qPCR | caaagactacagcccctacttc | tctgctccgtctcaaacttg |
| **Sma** | qPCR | gtgaagaggaagacagcacag | gcccattccaaccattactcc |
| **Cd45** | qPCR | gacagagttagtgaatggagacc | aaaagttcggagagtgtaggc |
| **Fsp** | qPCR | tgaacaagacagagctcaagg | gaagacacagtactcctggaag |
| **Adipo** | qPCR | gagaagggagagaaaggagatg | tgagcgatacacataagcgg |
| **Irf2** | Bis-Seq | atttttattttattgtattggaagttagtt | aaataatctactccaaaccctcctt |
| **Ece1** | Bis-Seq | tagggaggtttaagaatgttagggt | tcatcatcaaacaacacaaaaaaata |
| **Lck** | Bis-Seq | tttgaaggaatgtagagaggtttg | caaaaaaaacccaatcaaaaactta |
| **St6gal1** | Bis-Seq | taaaattaatatttaatggggagggtta | ctctcaaaatcaaaaccactatacaaa |
| **Pstpip2** | Bis-Seq | ttgtaatattttggtggtttttttt | ccctctaacatccaaacaacaata |
| **Igf1r** | Bis-Seq | agataggagtttttttaataatatagtagg | aaaaaaaatactcaaacaccaactc |
